# Supplementary material for: Activation of PPARα by Fenofibrate Attenuates the Effect of Local Heart High Dose Irradiation on the Mouse Cardiac Proteome
Source: MDPI journal article supplement (doi:10.3390/biomedicines9121845), 2021-12-06
Supplement: s1 [file s1]

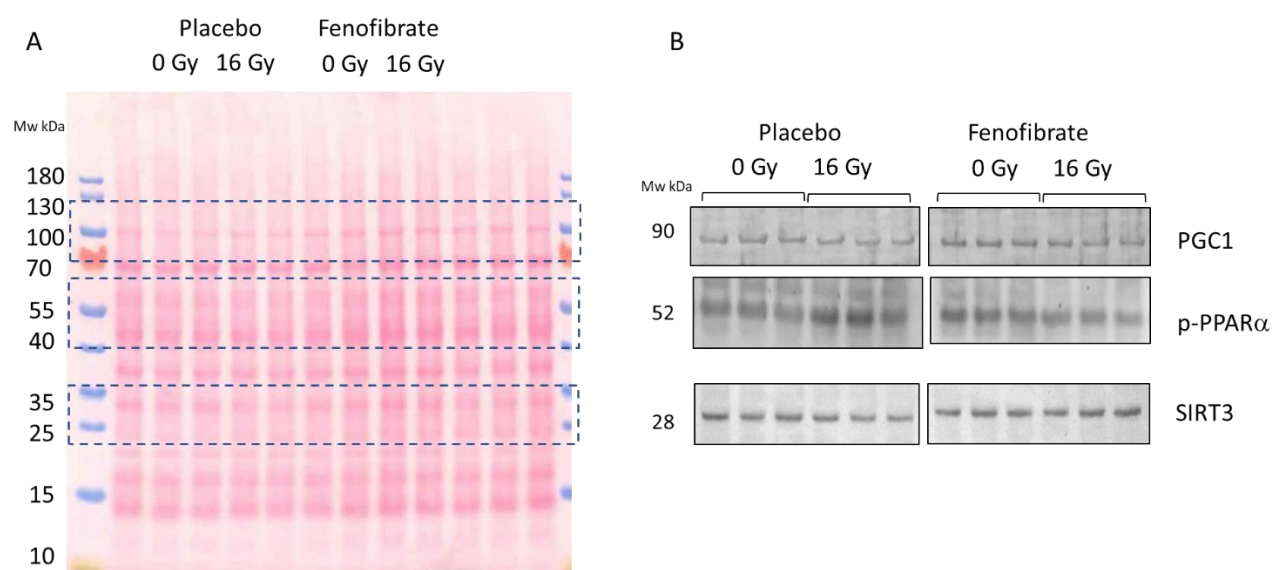

Figure S1. Full-length images of Ponceau S staining and antibody detections of replicates for PGC1, p-PPAR $\alpha$  and SIRT3.

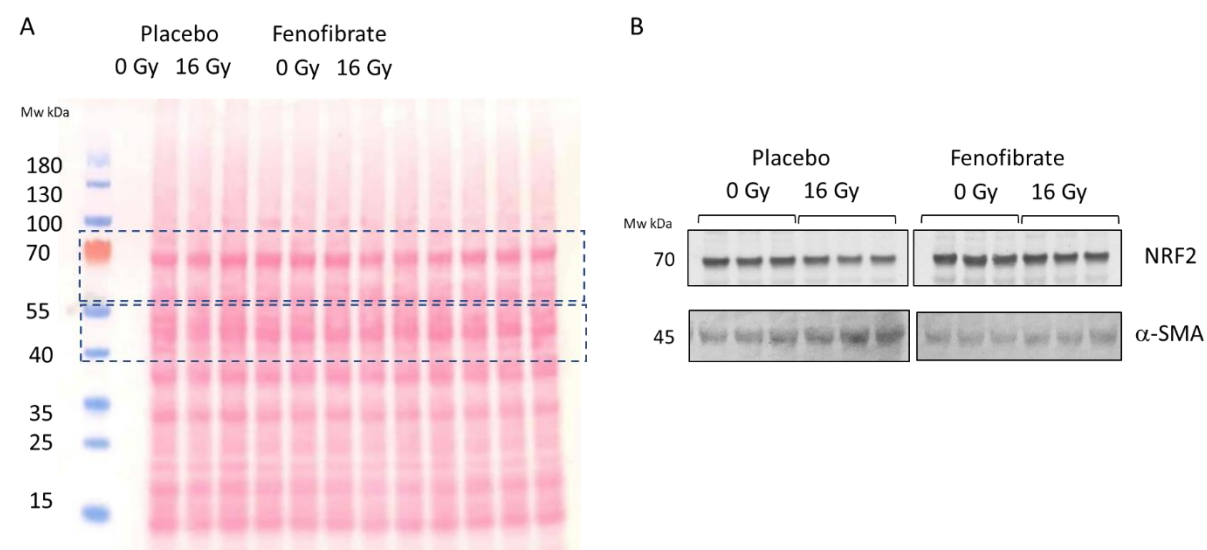

Figure S2. Full-length images of Ponceau S staining and antibody detections of replicates for NRF2 and  $\alpha$ -SMA.

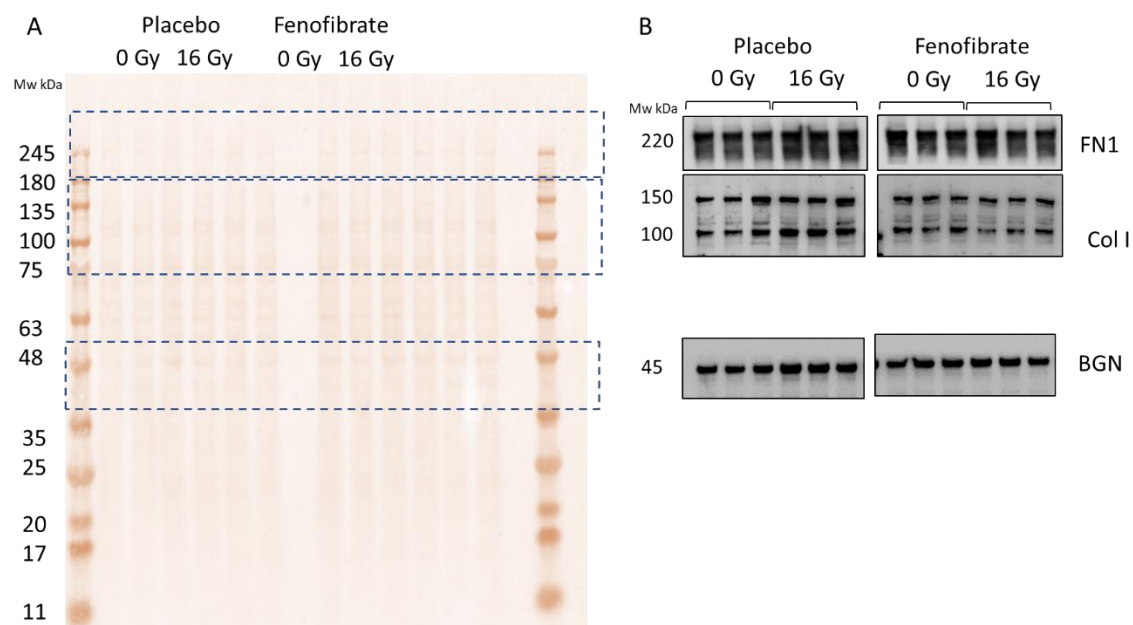

Figure S3. Full-length images of Ponceau S staining and antibody detections of replicates for FN1, Col I and BGN.

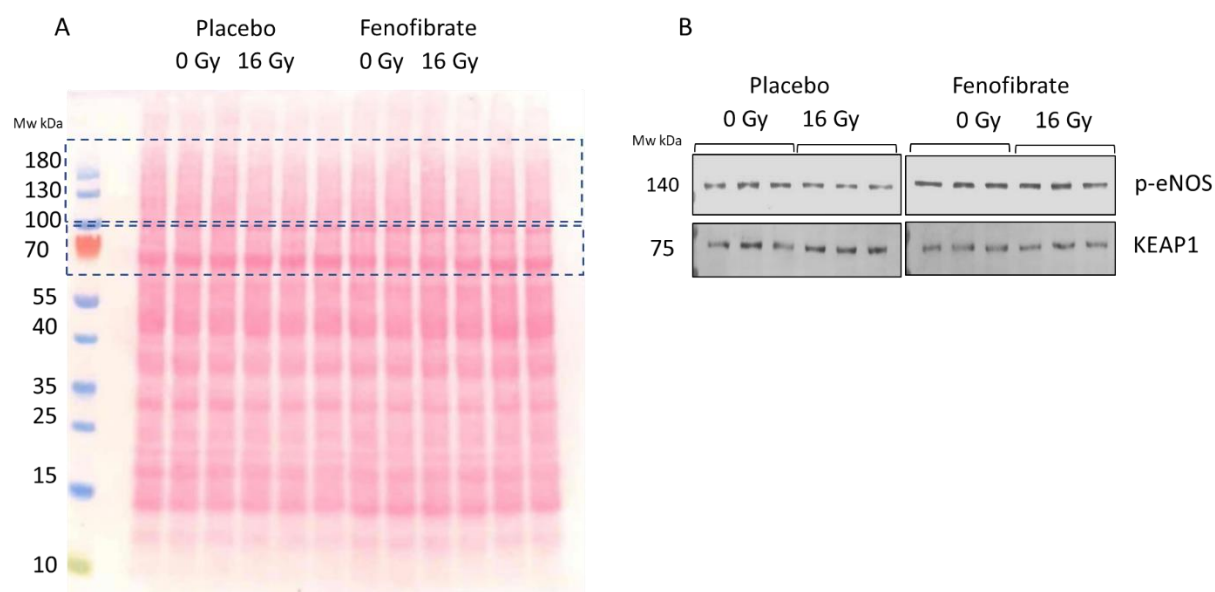

Figure S4. Full-length images of Ponceau S staining and antibody detections of replicates for p-eNOS and KEAP1.

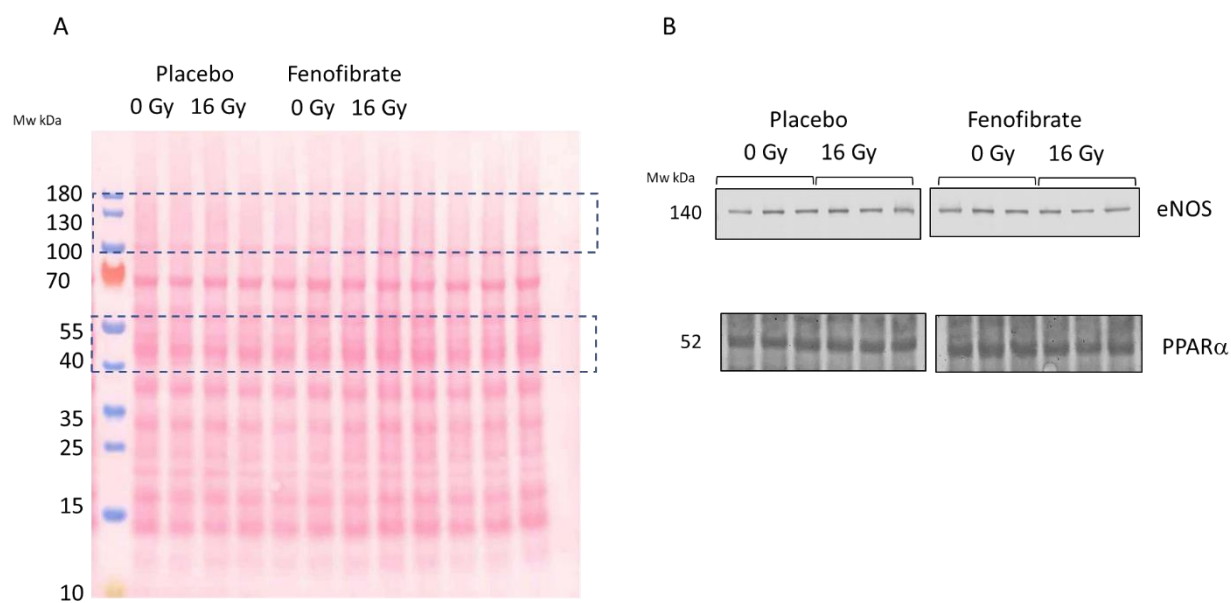

Figure S5. Full-length images of Ponceau S staining and antibody detections of replicates for PPAR $\alpha$  and eNOS
