# Supplementary material for: Activation of PPARα by Fenofibrate Attenuates the Effect of Local Heart High Dose Irradiation on the Mouse Cardiac Proteome
Source: Biomedicines. 2021 Dec 6;9(12):1845. doi: 10.3390/biomedicines9121845 (PMC8698387; doi:10.3390/biomedicines9121845)
Supplement: Supplementary file 1 [file biomedicines-09-01845-s001.zip › biomedicines-1441126.Supplementary Tables.xlsx]

## Sheet: S1
Tabel S1. All identified and quantified proteins
The proteins identified at least with 2 unique peptides are shown in bold.
													Normalized abundance
				Feno 16Gy vs Feno 0Gy		Placebo 16Gy vs Placebo 0Gy		Feno 0Gy vs Placebo 0Gy			Feno_0Gy					Feno_16Gy					Placebo_0Gy					Placebo_16Gy
Accession	Unique peptides	Confidence score	Name	ratio	p-value	ratio	p-value	ratio	p-value	Description	Replicate1	Replicate2	Replicate3	Replicate4	Replicate5	Replicate1	Replicate2	Replicate3	Replicate4	Replicate5	Replicate1	Replicate2	Replicate3	Replicate4	Replicate5	Replicate1	Replicate2	Replicate3	Replicate4	Replicate5
Q8R0P4	2	38.64	Aamdc	0.533629	0.0132842	1.05429	0.593961	1.37087	0.0431991	Q8R0P4|AAMDC_MOUSE Mth938 domain-containing protein OS=Mus musculus GN=Aamdc PE=1 SV=1	372316	561760	340407	586098	374618	390021	153584	209416	206665	233082	373848	311204	290393	317173	337883	248640	362548	323656	422623	361546
Q80YE4	1	17.68	Aatk	1.1544	0.526784	0.828476	0.310203	0.764059	0.257115	Q80YE4|LMTK1_MOUSE Serine/threonine-protein kinase LMTK1 OS=Mus musculus GN=Aatk PE=1 SV=1	19421.8	26053	31049	59047.4	29547.5	43083.8	44481.7	24665.7	41690	36692.2	24190.7	49358.4	57089.6	34373.7	51094.9	34697.4	28196.8	30831.2	46283.8	39030.6
P61922	6	265.45	Abat	1.06714	0.289354	1.39439	0.0103609	1.10145	0.344026	P61922|GABT_MOUSE 4-aminobutyrate aminotransferase, mitochondrial OS=Mus musculus GN=Abat PE=1 SV=1	2.4461e+06	2.24463e+06	2.291e+06	2.23055e+06	2.23377e+06	2.29614e+06	2.44836e+06	2.63032e+06	2.79142e+06	2.04833e+06	2.61926e+06	1.80297e+06	2.37018e+06	2.27374e+06	1.32562e+06	2.77977e+06	2.97901e+06	2.62039e+06	3.00495e+06	3.10607e+06
Q8K441	1	14.41	Abca6	0.564275	0.0252116	1.41425	0.286438	1.06636	0.818704	Q8K441|ABCA6_MOUSE ATP-binding cassette sub-family A member 6 OS=Mus musculus GN=Abca6 PE=1 SV=2	1.90165e+06	2.88732e+06	2.45661e+06	3.52424e+06	4.25714e+06	1.2017e+06	1.25504e+06	2.50245e+06	1.96175e+06	1.55841e+06	3.59842e+06	2.9029e+06	2.55271e+06	2.76406e+06	2.27375e+06	5.33111e+06	6.99831e+06	3.83817e+06	1.61066e+06	2.15117e+06
Q9CXJ4	3	213.51	Abcb8	0.910109	0.836059	1.15435	0.543422	1.13213	0.90663	Q9CXJ4|ABCB8_MOUSE ATP-binding cassette sub-family B member 8, mitochondrial OS=Mus musculus GN=Abcb8 PE=1 SV=1	375298	766258	303354	129080	169755	273961	638234	300958	57439.2	316406	103250	281348	434663	250566	470408	258209	380004	373159	460801	305803
P61222	2	90.74	Abce1	1.22983	0.162181	0.877305	0.375862	1.01322	0.809922	P61222|ABCE1_MOUSE ATP-binding cassette sub-family E member 1 OS=Mus musculus GN=Abce1 PE=1 SV=1	180573	217606	207821	212734	240684	303869	263836	148809	321824	264559	161202	246108	174126	256237	207922	148068	148666	158822	218652	243099
Q7TMS5	1	13.16	Abcg2	1.22016	0.0604124	1.44635	0.0176956	0.967247	0.570299	Q7TMS5|ABCG2_MOUSE ATP-binding cassette sub-family G member 2 OS=Mus musculus GN=Abcg2 PE=1 SV=1	1.67182e+06	1.97104e+06	1.72378e+06	1.50557e+06	1.75282e+06	2.11437e+06	2.00913e+06	1.85879e+06	2.69927e+06	1.84235e+06	1.89228e+06	1.58964e+06	1.67129e+06	1.94988e+06	1.814e+06	2.29103e+06	2.70349e+06	3.49847e+06	1.96549e+06	2.43881e+06
Q6PE15	2	128.15	Abhd10	1.25113	0.0687192	0.975283	0.761398	0.863829	0.0827545	Q6PE15|ABHDA_MOUSE Mycophenolic acid acyl-glucuronide esterase, mitochondrial OS=Mus musculus GN=Abhd10 PE=1 SV=1	163168	199748	178671	230033	219267	270091	298221	199758	271251	200408	225877	258887	241040	202433	218851	263449	246959	225236	176267	206825
Q8K4F5;Q9QY06	4	167.99	Abhd11	0.944744	0.300085	0.889882	0.215154	0.939281	0.519063	Q8K4F5|ABHDB_MOUSE Protein ABHD11 OS=Mus musculus GN=Abhd11 PE=1 SV=1	3.42675e+06	3.85037e+06	3.57218e+06	3.44321e+06	3.68688e+06	3.86204e+06	3.37003e+06	2.86424e+06	3.52329e+06	3.36632e+06	4.76088e+06	4.02782e+06	3.83795e+06	3.46803e+06	3.04697e+06	3.55402e+06	2.91293e+06	3.58017e+06	3.47114e+06	3.51554e+06
Q8VCR7	2	61.72	Abhd14b	0.830099	0.0423122	1.2514	0.0989945	1.13969	0.0492167	Q8VCR7|ABHEB_MOUSE Protein ABHD14B OS=Mus musculus GN=Abhd14b PE=1 SV=1	6.4402e+06	7.14821e+06	7.13645e+06	8.41655e+06	7.78475e+06	7.21323e+06	4.89509e+06	5.68771e+06	6.654e+06	6.20234e+06	6.84963e+06	5.93483e+06	6.07419e+06	6.53924e+06	7.0024e+06	1.08135e+07	8.8071e+06	8.30011e+06	6.12024e+06	6.50478e+06
Q8K4G5	28	1292.7	Ablim1	1.02788	0.578789	1.00079	0.985897	1.03877	0.259915	Q8K4G5|ABLM1_MOUSE Actin-binding LIM protein 1 OS=Mus musculus GN=Ablim1 PE=1 SV=1	4.30934e+07	4.38937e+07	3.96387e+07	4.44438e+07	4.49069e+07	4.99575e+07	4.35837e+07	3.84825e+07	4.40519e+07	4.59223e+07	4.30015e+07	4.27079e+07	4.03009e+07	4.32523e+07	3.86522e+07	4.28739e+07	3.65091e+07	3.98949e+07	4.55591e+07	4.32425e+07
Q4KML4	1	20.64	Abracl	0.734737	0.261034	0.956041	0.893349	1.26983	0.353046	Q4KML4|ABRAL_MOUSE Costars family protein ABRACL OS=Mus musculus GN=Abracl PE=1 SV=1	46751.5	90252.7	73917.5	130386	55356.8	78195.6	81191.7	48194	49221.7	34640.9	30453.7	115890	50516.4	25472.1	90044.1	49888	39569	54016.4	60975.5	94195
Q921H8;Q8VCH0	7	606.7	Acaa1a	1.15664	0.33763	0.753577	0.00495909	0.850748	0.0165733	Q921H8|THIKA_MOUSE 3-ketoacyl-CoA thiolase A, peroxisomal OS=Mus musculus GN=Acaa1a PE=1 SV=1	3.69881e+06	3.42419e+06	3.3852e+06	3.7788e+06	4.03948e+06	6.26844e+06	4.52535e+06	3.53134e+06	3.26854e+06	3.60343e+06	3.82798e+06	4.90062e+06	4.23207e+06	4.48412e+06	4.09684e+06	3.20541e+06	2.55962e+06	3.26716e+06	3.33359e+06	3.8675e+06
Q8BWT1	47	4769.46	Acaa2	0.864964	0.12713	0.641193	2.67288e-05	0.927751	0.0942635	Q8BWT1|THIM_MOUSE 3-ketoacyl-CoA thiolase, mitochondrial OS=Mus musculus GN=Acaa2 PE=1 SV=3	1.36145e+09	1.2098e+09	1.20312e+09	1.29077e+09	1.30133e+09	1.19204e+09	1.43151e+09	9.35459e+08	9.06786e+08	1.04098e+09	1.38639e+09	1.48707e+09	1.22497e+09	1.3762e+09	1.38765e+09	8.19862e+08	8.05165e+08	8.3096e+08	9.38175e+08	1.00587e+09
Q8K370	11	516.88	Acad10	0.989284	0.863991	0.96098	0.560334	0.904526	0.258971	Q8K370|ACD10_MOUSE Acyl-CoA dehydrogenase family member 10 OS=Mus musculus GN=Acad10 PE=1 SV=1	9.65316e+07	1.16456e+08	1.04969e+08	1.17317e+08	1.26539e+08	1.03439e+08	9.90267e+07	1.14558e+08	1.22959e+08	1.15809e+08	1.3064e+08	1.38927e+08	1.05831e+08	1.05479e+08	1.40236e+08	1.21015e+08	1.18991e+08	1.24527e+08	1.19309e+08	1.13035e+08
Q80XL6	2	39.26	Acad11	0.821018	0.099399	0.368858	0.000819952	0.779554	0.10588	Q80XL6|ACD11_MOUSE Acyl-CoA dehydrogenase family member 11 OS=Mus musculus GN=Acad11 PE=1 SV=2	197499	155126	152521	189899	184599	148422	183810	162113	102655	125203	209495	272179	192067	295575	159078	65830.2	71049.6	85413.1	71627.9	122296
Q9D7B6	8	497.22	Acad8	0.988642	0.844278	0.703776	0.00017645	0.810672	0.00322798	Q9D7B6|ACAD8_MOUSE Isobutyryl-CoA dehydrogenase, mitochondrial OS=Mus musculus GN=Acad8 PE=1 SV=2	8.05348e+06	6.48574e+06	7.41006e+06	7.26334e+06	8.25457e+06	8.38872e+06	7.56061e+06	6.73063e+06	7.1393e+06	7.22238e+06	9.79638e+06	9.6107e+06	8.873e+06	8.4305e+06	9.50684e+06	7.36307e+06	6.75099e+06	5.34221e+06	6.42406e+06	6.64638e+06
Q8JZN5	16	1045.91	Acad9	1.25879	0.0166317	0.7815	0.0333367	0.838897	0.107916	Q8JZN5|ACAD9_MOUSE Acyl-CoA dehydrogenase family member 9, mitochondrial OS=Mus musculus GN=Acad9 PE=1 SV=2	1.48638e+07	1.27076e+07	1.17577e+07	1.07419e+07	1.2317e+07	1.76076e+07	1.71163e+07	1.3058e+07	1.47554e+07	1.59961e+07	1.42497e+07	1.1373e+07	1.62699e+07	1.80305e+07	1.4446e+07	9.94174e+06	1.03762e+07	1.26332e+07	1.27982e+07	1.237e+07
P51174	36	3145.43	Acadl	0.983475	0.726017	0.801329	0.000311687	0.848924	0.0099696	P51174|ACADL_MOUSE Long-chain specific acyl-CoA dehydrogenase, mitochondrial OS=Mus musculus GN=Acadl PE=1 SV=2	1.1215e+09	9.29825e+08	1.13146e+09	1.02005e+09	1.02215e+09	1.04e+09	1.12057e+09	9.52155e+08	1.04907e+09	9.76853e+08	1.28775e+09	1.23256e+09	1.32325e+09	1.22017e+09	1.09111e+09	9.53482e+08	9.89529e+08	9.96953e+08	9.90804e+08	1.00128e+09
P45952	38	1965.11	Acadm	0.981168	0.613466	0.882661	0.0376145	0.911607	0.0864735	P45952|ACADM_MOUSE Medium-chain specific acyl-CoA dehydrogenase, mitochondrial OS=Mus musculus GN=Acadm PE=1 SV=1	8.06097e+08	8.0143e+08	8.18878e+08	7.39111e+08	8.13571e+08	7.80945e+08	8.17439e+08	6.93095e+08	8.35723e+08	7.76948e+08	9.22107e+08	8.96477e+08	9.58755e+08	8.30608e+08	7.56966e+08	7.20412e+08	7.40256e+08	7.95233e+08	8.35289e+08	7.61548e+08
Q07417	26	2090.14	Acads	0.981283	0.741137	0.749068	2.83395e-05	0.873051	0.00928716	Q07417|ACADS_MOUSE Short-chain specific acyl-CoA dehydrogenase, mitochondrial OS=Mus musculus GN=Acads PE=1 SV=2	2.22278e+08	2.01809e+08	2.2127e+08	1.93478e+08	1.99572e+08	2.26719e+08	2.1842e+08	1.71819e+08	2.08293e+08	1.9372e+08	2.39149e+08	2.24149e+08	2.48716e+08	2.5573e+08	2.21657e+08	1.81885e+08	1.70213e+08	1.7657e+08	1.80283e+08	1.81991e+08
Q9DBL1	13	969.69	Acadsb	1.21622	0.0101088	0.837857	0.00657155	0.823465	8.85114e-05	Q9DBL1|ACDSB_MOUSE Short/branched chain specific acyl-CoA dehydrogenase, mitochondrial OS=Mus musculus GN=Acadsb PE=1 SV=1	1.91842e+07	1.8558e+07	1.85897e+07	2.06074e+07	1.93307e+07	2.79972e+07	2.34631e+07	2.17413e+07	2.2032e+07	2.18522e+07	2.42754e+07	2.34087e+07	2.23589e+07	2.44454e+07	2.24201e+07	1.96894e+07	1.75952e+07	1.80716e+07	1.96187e+07	2.29777e+07
P50544	54	4239.22	Acadvl	0.966938	0.481842	0.830002	0.00392638	0.908382	0.0583054	P50544|ACADV_MOUSE Very long-chain specific acyl-CoA dehydrogenase, mitochondrial OS=Mus musculus GN=Acadvl PE=1 SV=3	7.27779e+08	6.86431e+08	6.97111e+08	6.51403e+08	6.87158e+08	6.46092e+08	7.80468e+08	6.38654e+08	6.38301e+08	6.32307e+08	7.80197e+08	7.85553e+08	7.64881e+08	8.14667e+08	6.52531e+08	6.11406e+08	5.78165e+08	6.55013e+08	6.67668e+08	6.39955e+08
Q8QZT1	36	2857.44	Acat1	0.938812	0.170135	0.843734	0.000893429	0.91457	0.0446774	Q8QZT1|THIL_MOUSE Acetyl-CoA acetyltransferase, mitochondrial OS=Mus musculus GN=Acat1 PE=1 SV=1	4.8084e+08	4.44962e+08	5.00591e+08	4.5096e+08	4.54929e+08	4.86099e+08	4.45129e+08	4.29359e+08	4.41128e+08	3.87857e+08	5.239e+08	5.38455e+08	5.23925e+08	5.09712e+08	4.54147e+08	4.36476e+08	4.12131e+08	4.32441e+08	4.28828e+08	4.41764e+08
P28271	11	447.37	Aco1	1.06496	0.195879	1.04499	0.143209	1.08476	0.0697048	P28271|ACOC_MOUSE Cytoplasmic aconitate hydratase OS=Mus musculus GN=Aco1 PE=1 SV=3	5.53417e+06	4.9845e+06	5.23056e+06	4.56015e+06	4.98736e+06	5.03306e+06	5.97075e+06	5.10135e+06	5.31581e+06	5.51913e+06	4.46488e+06	4.54469e+06	4.50064e+06	4.864e+06	4.94587e+06	5.06107e+06	4.62101e+06	4.74818e+06	4.99323e+06	4.94571e+06
Q99KI0	86	6948.16	Aco2	1.04753	0.238412	0.833304	5.72205e-05	0.910028	0.0104013	Q99KI0|ACON_MOUSE Aconitate hydratase, mitochondrial OS=Mus musculus GN=Aco2 PE=1 SV=1	3.57172e+09	3.23211e+09	3.53557e+09	3.40666e+09	3.57831e+09	3.7898e+09	3.95691e+09	3.3213e+09	3.58091e+09	3.49885e+09	3.79571e+09	3.80378e+09	4.02619e+09	3.86759e+09	3.54391e+09	3.149e+09	3.08586e+09	3.2062e+09	3.17631e+09	3.24639e+09
O55137	2	465.23	Acot1	0.528128	0.152964	0.346887	0.00105276	0.737478	0.176336	O55137|ACOT1_MOUSE Acyl-coenzyme A thioesterase 1 OS=Mus musculus GN=Acot1 PE=1 SV=1	270738	107461	238291	89326.2	72642.3	28333.1	159651	71146	60126.1	91869.8	167811	294204	229475	192384	171696	59732.7	52353.5	123764	86202.5	44110.7
Q9CQR4	9	535.56	Acot13	1.03537	0.497286	0.791083	0.0690128	0.911972	0.476815	Q9CQR4|ACO13_MOUSE Acyl-coenzyme A thioesterase 13 OS=Mus musculus GN=Acot13 PE=1 SV=1	9.06425e+07	8.61679e+07	8.79752e+07	8.53815e+07	7.16289e+07	9.64928e+07	8.65583e+07	8.07307e+07	8.50965e+07	8.78379e+07	7.66562e+07	8.26246e+07	1.06643e+08	1.20963e+08	7.56224e+07	7.0376e+07	7.43718e+07	6.93092e+07	7.34595e+07	7.83671e+07
Q9QYR9;Q6Q2Z6;Q32Q92	11	1387.82	Acot2	0.902589	0.175542	0.747363	0.000178825	0.899071	0.0647943	Q9QYR9|ACOT2_MOUSE Acyl-coenzyme A thioesterase 2, mitochondrial OS=Mus musculus GN=Acot2 PE=1 SV=2	4.12322e+07	3.6695e+07	4.49241e+07	4.06174e+07	3.63631e+07	3.76593e+07	4.35568e+07	3.25719e+07	3.38691e+07	3.27089e+07	4.37857e+07	4.52272e+07	4.94719e+07	4.12912e+07	4.24885e+07	3.32973e+07	3.05966e+07	3.56715e+07	3.49815e+07	3.15654e+07
Q91V12	2	56.04	Acot7	1.19808	0.267899	1.42962	0.00108894	1.20946	0.0790159	Q91V12|BACH_MOUSE Cytosolic acyl coenzyme A thioester hydrolase OS=Mus musculus GN=Acot7 PE=1 SV=2	407816	456405	367513	578355	525887	769724	631230	565038	439519	393174	421131	370039	415828	362734	361686	625327	527858	601062	450155	556796
Q9R0X4;Q32MW3	8	299.49	Acot9	1.03672	0.423378	1.11895	0.0928844	1.06893	0.312488	Q9R0X4|ACOT9_MOUSE Acyl-coenzyme A thioesterase 9, mitochondrial OS=Mus musculus GN=Acot9 PE=1 SV=1	3.22196e+06	3.22744e+06	3.59079e+06	3.42567e+06	3.29354e+06	3.06428e+06	3.58229e+06	3.48322e+06	3.85018e+06	3.39488e+06	3.16069e+06	3.15204e+06	3.52839e+06	3.40762e+06	2.42986e+06	3.46619e+06	3.62526e+06	3.59647e+06	3.40192e+06	3.45381e+06
Q9R0H0	8	415.57	Acox1	0.729302	0.038717	0.809442	0.038457	1.13587	0.697375	Q9R0H0|ACOX1_MOUSE Peroxisomal acyl-coenzyme A oxidase 1 OS=Mus musculus GN=Acox1 PE=1 SV=5	3.2974e+06	2.56592e+06	2.68287e+06	2.67106e+06			2.65019e+06	2.15047e+06	1.56173e+06	1.81837e+06	2.69168e+06	2.59634e+06	2.63259e+06	2.52308e+06	1.90068e+06	1.63098e+06	1.98522e+06	2.34591e+06	1.8598e+06	2.17014e+06
Q9D358	3	157.43	Acp1	0.458366	0.000557514	1.74493	0.0117595	1.78042	0.00032714	Q9D358|PPAC_MOUSE Low molecular weight phosphotyrosine protein phosphatase OS=Mus musculus GN=Acp1 PE=1 SV=3	2.88693e+06	4.68484e+06	3.25422e+06	4.48576e+06	3.73304e+06	1.4551e+06	1.60592e+06	2.14579e+06	2.02197e+06	1.50072e+06	2.13255e+06	2.09211e+06	2.22004e+06	2.0438e+06	2.20831e+06	3.95964e+06	5.02347e+06	4.3626e+06	3.09532e+06	2.22417e+06
Q8BP40	3	121.25	Acp6	1.14506	0.172276	0.847555	0.0118516	0.996154	0.922528	Q8BP40|PPA6_MOUSE Lysophosphatidic acid phosphatase type 6 OS=Mus musculus GN=Acp6 PE=1 SV=1	2.05199e+06	1.67163e+06	2.02626e+06	1.60843e+06	1.68732e+06	2.65507e+06	1.92819e+06	1.85742e+06	1.94336e+06	1.97372e+06	1.73086e+06	1.87566e+06	2.01774e+06	1.84178e+06	1.6145e+06	1.56958e+06	1.39841e+06	1.47997e+06	1.53917e+06	1.70913e+06
Q8VCW8	11	556.13	Acsf2	0.937498	0.590901	0.879539	0.186623	1.11824	0.394827	Q8VCW8|ACSF2_MOUSE Acyl-CoA synthetase family member 2, mitochondrial OS=Mus musculus GN=Acsf2 PE=1 SV=1	4.772e+06	5.72513e+06	3.90134e+06	6.30549e+06	6.83174e+06	5.40941e+06	5.758e+06	4.40546e+06	4.41057e+06	5.83122e+06	5.31981e+06	4.87176e+06	4.62121e+06	5.028e+06	4.78326e+06	5.39113e+06	3.72013e+06	3.34317e+06	4.11549e+06	5.08787e+06
Q3URE1	5	217.02	Acsf3	1.01974	0.750149	0.834888	0.0139133	0.919819	0.171403	Q3URE1|ACSF3_MOUSE Acyl-CoA synthetase family member 3, mitochondrial OS=Mus musculus GN=Acsf3 PE=1 SV=2	1.22686e+06	1.4437e+06	1.26599e+06	1.29802e+06	1.19756e+06	1.37564e+06	1.3559e+06	1.07243e+06	1.30671e+06	1.44844e+06	1.20897e+06	1.39785e+06	1.47627e+06	1.566e+06	1.34373e+06	1.28021e+06	1.05759e+06	1.11331e+06	1.2502e+06	1.13691e+06
P41216;Q8JZR0	39	2473.66	Acsl1	1.02082	0.80892	0.751752	0.0290324	0.95112	0.61602	P41216|ACSL1_MOUSE Long-chain-fatty-acid--CoA ligase 1 OS=Mus musculus GN=Acsl1 PE=1 SV=2	2.28608e+08	1.89061e+08	1.71459e+08	1.72468e+08	2.11038e+08	1.89184e+08	2.41631e+08	1.71555e+08	1.89259e+08	2.01252e+08	1.89519e+08	1.9363e+08	1.74319e+08	2.62164e+08	2.02987e+08	1.51646e+08	1.21468e+08	1.41516e+08	1.62058e+08	1.92068e+08
Q99NB1	22	1640.05	Acss1	1.04564	0.45346	0.790535	0.000423925	0.841348	0.00612819	Q99NB1|ACS2L_MOUSE Acetyl-coenzyme A synthetase 2-like, mitochondrial OS=Mus musculus GN=Acss1 PE=1 SV=1	8.52271e+07	6.92573e+07	8.21383e+07	7.54044e+07	8.39521e+07	8.16377e+07	9.53297e+07	7.49542e+07	7.8402e+07	8.37284e+07	9.76683e+07	9.0523e+07	1.01285e+08	9.40148e+07	8.71578e+07	7.46798e+07	6.7413e+07	7.23363e+07	7.592e+07	8.17149e+07
P68134	4	4553.72	Acta1	0.924151	0.810204	0.883541	0.773031	1.82487	0.0731775	P68134|ACTS_MOUSE Actin, alpha skeletal muscle OS=Mus musculus GN=Acta1 PE=1 SV=1	1.65234e+06	2.00331e+06	1.31545e+06	1.04516e+06	798827	2.21774e+06	1.09089e+06	529651	1.96226e+06	497617	513353	603291	890566	1.50601e+06	221354	484253	746645	116240	646411	1.3061e+06
P62737;P63268	1	5003.88	Acta2	0.879061	0.592738	1.0841	0.629218	1.02273	0.898897	P62737|ACTA_MOUSE Actin, aortic smooth muscle OS=Mus musculus GN=Acta2 PE=1 SV=1	6.51217e+06	4.55476e+06	3.97123e+06	5.12371e+06	2.8737e+06	1.19811e+06	5.96986e+06	4.71134e+06	3.73286e+06	4.63749e+06	2.4672e+06	4.66176e+06	5.43939e+06	4.27377e+06	5.68138e+06	4.46712e+06	6.72824e+06	4.13972e+06	4.02148e+06	5.06112e+06
P60710	12	2471.29	Actb	1.18719	0.0317167	1.41126	9.77696e-05	1.17017	0.000746697	P60710|ACTB_MOUSE Actin, cytoplasmic 1 OS=Mus musculus GN=Actb PE=1 SV=1	1.32128e+08	1.29521e+08	1.27306e+08	1.40835e+08	1.18371e+08	1.84737e+08	1.469e+08	1.33203e+08	1.47451e+08	1.57196e+08	1.0996e+08	1.13032e+08	1.11761e+08	1.07373e+08	1.11775e+08	1.69042e+08	1.64794e+08	1.48424e+08	1.35381e+08	1.64057e+08
Q8BFZ3	3	951.67	Actbl2	0.862619	0.413505	1.28636	0.180595	1.24947	0.0827493	Q8BFZ3|ACTBL_MOUSE Beta-actin-like protein 2 OS=Mus musculus GN=Actbl2 PE=1 SV=1	7.21398e+06	9.39731e+06	8.63942e+06	6.04908e+06	6.25545e+06	2.91544e+06	6.57811e+06	9.03954e+06	6.53331e+06	7.32946e+06	5.4652e+06	5.7461e+06	5.44627e+06	5.64476e+06	7.75451e+06	6.39983e+06	5.33228e+06	8.85779e+06	1.14324e+07	6.64152e+06
Q7TPR4	9	2283.2	Actn1	1.78744	0.0228117	0.681038	0.00323555	0.467701	3.45855e-05	Q7TPR4|ACTN1_MOUSE Alpha-actinin-1 OS=Mus musculus GN=Actn1 PE=1 SV=1	6.74856e+06	4.88505e+06	4.87267e+06	5.29331e+06	4.37894e+06	1.43153e+07	1.04831e+07	6.58276e+06	7.09652e+06	8.31491e+06	9.04968e+06	1.14034e+07	1.2886e+07	1.13018e+07	1.13319e+07	7.71595e+06	7.20375e+06	6.26648e+06	9.85681e+06	7.07665e+06
Q9JI91	69	7277.06	Actn2	1.01647	0.643686	0.927466	0.198614	1.00387	0.890866	Q9JI91|ACTN2_MOUSE Alpha-actinin-2 OS=Mus musculus GN=Actn2 PE=1 SV=2	1.01188e+09	9.63759e+08	9.48839e+08	9.29438e+08	1.02993e+09	9.7552e+08	1.01162e+09	8.95265e+08	1.05449e+09	1.0274e+09	9.74065e+08	9.27692e+08	1.01182e+09	1.09111e+09	8.60355e+08	9.17994e+08	8.02405e+08	8.63537e+08	9.40227e+08	9.87995e+08
O88990	1	1257.01	Actn3	2.59841	0.143409	0.209255	0.211193	0.428284	0.77988	O88990|ACTN3_MOUSE Alpha-actinin-3 OS=Mus musculus GN=Actn3 PE=2 SV=1	119241	184265	186202	28190.9	138184	0	697527	368500	128866	509883	41749.6	8567.04	606163	854694	20715.4	40013.7	77504.3	56017.5	30684.8	116335
P57780	21	2597.7	Actn4	1.42392	0.000171488	1.324	0.00153043	1.00641	0.837666	P57780|ACTN4_MOUSE Alpha-actinin-4 OS=Mus musculus GN=Actn4 PE=1 SV=1	9.98946e+06	1.0164e+07	1.03589e+07	1.05865e+07	9.60949e+06	1.5839e+07	1.34358e+07	1.2494e+07	1.52508e+07	1.51852e+07	8.9242e+06	9.57755e+06	1.07038e+07	1.08001e+07	1.03796e+07	1.51537e+07	1.39183e+07	1.35552e+07	1.20655e+07	1.20177e+07
P61164	2	173.27	Actr1a	1.07654	0.408021	1.24566	0.00842637	1.0813	0.296132	P61164|ACTZ_MOUSE Alpha-centractin OS=Mus musculus GN=Actr1a PE=1 SV=1	1.85236e+06	2.24755e+06	2.15329e+06	2.27155e+06	2.35788e+06	2.0521e+06	1.9476e+06	2.22828e+06	2.74244e+06	2.74515e+06	2.28998e+06	2.03057e+06	2.22007e+06	1.87967e+06	1.64414e+06	2.76991e+06	2.56586e+06	2.34179e+06	2.53026e+06	2.32903e+06
Q8R5C5	2	177.22	Actr1b	1.04544	0.49171	1.164	0.0633056	0.958662	0.639058	Q8R5C5|ACTY_MOUSE Beta-centractin OS=Mus musculus GN=Actr1b PE=1 SV=1	1.19297e+06	1.4939e+06	1.28e+06	1.48763e+06	1.31671e+06	1.33315e+06	1.38335e+06	1.25107e+06	1.52809e+06	1.58328e+06	1.53234e+06	1.50168e+06	1.25136e+06	1.15839e+06	1.61943e+06	1.73731e+06	1.83221e+06	1.51289e+06	1.53002e+06	1.60913e+06
P61161	4	170.77	Actr2	1.40389	0.00749238	1.36476	0.00117732	1.03715	0.684325	P61161|ARP2_MOUSE Actin-related protein 2 OS=Mus musculus GN=Actr2 PE=1 SV=1	1.25452e+06	919082	947543	1.14484e+06	956804	1.72382e+06	1.31319e+06	1.17145e+06	1.57317e+06	1.55058e+06	959987	917843	874968	1.2295e+06	1.05342e+06	1.45026e+06	1.29494e+06	1.43234e+06	1.43635e+06	1.25864e+06
Q99JY9;Q641P0	6	274.56	Actr3	1.54488	0.00957457	1.23535	0.00783463	0.815458	0.0144693	Q99JY9|ARP3_MOUSE Actin-related protein 3 OS=Mus musculus GN=Actr3 PE=1 SV=3	2.3496e+06	2.3405e+06	2.47599e+06	2.71572e+06	2.88631e+06	3.11005e+06	3.11192e+06	3.84089e+06	5.12887e+06	4.5335e+06	3.01129e+06	2.87132e+06	3.64601e+06	3.34708e+06	2.78189e+06	4.08268e+06	3.58821e+06	3.4968e+06	4.12076e+06	4.05409e+06
Q99JW2	1	56.69	Acy1	0.53109	0.0126776	1.12084	0.461709	1.29361	0.117466	Q99JW2|ACY1_MOUSE Aminoacylase-1 OS=Mus musculus GN=Acy1 PE=1 SV=1	88807.7	110799	111232	102041	94335.7	0	64626.5	54740.7	82851.4	67158.1	88896.6	102820	52812.9	46191.2	101373	91767.4	91579.2	81527.1	85210.2	89389.3
Q91XE4	3	141.99	Acy3	1.05267	0.64054	1.02532	0.857974	1.05612	0.65839	Q91XE4|ACY3_MOUSE N-acyl-aromatic-L-amino acid amidohydrolase (carboxylate-forming) OS=Mus musculus GN=Acy3 PE=1 SV=1	926223	870032	674061	848441	598754	877456	687453	688621	966265	904037	700313	507831	803161	901342	796701	742682	501396	728589	942744	887854
P56376	3	151.54	Acyp1	0.716551	0.0242236	1.58522	0.00991998	1.43605	0.026384	P56376|ACYP1_MOUSE Acylphosphatase-1 OS=Mus musculus GN=Acyp1 PE=1 SV=2	1.45453e+06	2.24295e+06	1.99517e+06	2.21185e+06	1.73438e+06	1.36189e+06	920640	1.42956e+06	1.70454e+06	1.49013e+06	1.65579e+06	1.63477e+06	1.23571e+06	906963	1.27884e+06	1.77148e+06	2.36084e+06	1.83826e+06	2.75507e+06	1.91442e+06
P56375	3	128.88	Acyp2	0.612758	0.00389976	1.06311	0.424505	1.35882	0.0309983	P56375|ACYP2_MOUSE Acylphosphatase-2 OS=Mus musculus GN=Acyp2 PE=1 SV=2	4.95962e+06	5.53464e+06	6.61582e+06	5.88465e+06	3.68969e+06	3.75244e+06	3.44083e+06	2.94833e+06	3.28386e+06	2.92563e+06	4.74144e+06	3.96338e+06	3.68805e+06	3.47909e+06	3.766e+06	3.56187e+06	4.24371e+06	4.15966e+06	4.80843e+06	4.10372e+06
P59384	1	15.53	Adamts15	0.696303	0.170613	0.650886	0.236943	0.526255	0.0152528	P59384|ATS15_MOUSE A disintegrin and metalloproteinase with thrombospondin motifs 15 OS=Mus musculus GN=Adamts15 PE=2 SV=2	102085	99400.4	155739	94741.9	46406.6	39744.3	79047.2	50690.7	87776.4	89759.6	141654	143256	204063	220203	237842	290070	30247.1	118339	146836	30907.7
P84309	1	16.09	Adcy5	0.415765	0.142466	0.994617	0.987291	3.6519	0.0253379	P84309|ADCY5_MOUSE Adenylate cyclase type 5 OS=Mus musculus GN=Adcy5 PE=1 SV=2	58875	211020	47836.3	277221	80037.8	106208	19787	72782.9	36921.3	44938.5	72769.2	44105.4	17874.3	27710.6	22373.2	21973.7	30547.3	62395.7	32026.5	36894.3
Q9QYC0	3	132.02	Add1	0.851478	0.15149	1.10857	0.447103	1.14834	0.131799	Q9QYC0|ADDA_MOUSE Alpha-adducin OS=Mus musculus GN=Add1 PE=1 SV=2	175635	187920	187135	192296	201587	143577	161021	119089	157639	222958	173668	192126	125048	138890	192823	158508	238334	179186	136360	199473
Q9QYB5	3	80.14	Add3	0.882771	0.588729	1.34668	0.0847905	1.15516	0.492946	Q9QYB5|ADDG_MOUSE Gamma-adducin OS=Mus musculus GN=Add3 PE=1 SV=2	87806.5	75525.3	162115	115683	135948	158366	92197.6	72460.7	59393.4	127009	119453	95176.2	101415	61395.6	122125	112291	177526	146156	98120.8	138661
P00329	3	112.24	Adh1	0.270802	0.0216024	0.637103	0.117613	1.48628	0.185136	P00329|ADH1_MOUSE Alcohol dehydrogenase 1 OS=Mus musculus GN=Adh1 PE=1 SV=2	489312	1.44632e+06	520682	532868	603652	182242	204226	206587	125390	254500	454186	601220	403271	529559	429099	128134	269264	94319.3	546711	501665
P28474	8	376.87	Adh5	0.936436	0.191526	1.00239	0.935284	1.03431	0.367848	P28474|ADHX_MOUSE Alcohol dehydrogenase class-3 OS=Mus musculus GN=Adh5 PE=1 SV=3	1.06626e+07	1.24005e+07	1.23567e+07	1.237e+07	1.1917e+07	1.248e+07	9.91368e+06	1.09304e+07	1.14898e+07	1.10977e+07	1.10845e+07	1.09724e+07	1.19564e+07	1.19393e+07	1.17733e+07	1.24981e+07	1.13293e+07	1.0998e+07	1.14938e+07	1.15447e+07
Q8R0N6	5	250.31	Adhfe1	1.12031	0.221802	0.892915	0.13956	0.935602	0.377445	Q8R0N6|HOT_MOUSE Hydroxyacid-oxoacid transhydrogenase, mitochondrial OS=Mus musculus GN=Adhfe1 PE=1 SV=2	1.65008e+06	1.73809e+06	1.74025e+06	2.17981e+06	2.33662e+06	2.30704e+06	2.07709e+06	1.78606e+06	2.22592e+06	2.40908e+06	1.78721e+06	2.21794e+06	2.1334e+06	2.11529e+06	2.05486e+06	2.1561e+06	1.63564e+06	1.59268e+06	1.76561e+06	2.05476e+06
Q60994	4	269.11	Adipoq	1.12596	0.133557	1.25752	0.000998946	1.03612	0.457126	Q60994|ADIPO_MOUSE Adiponectin OS=Mus musculus GN=Adipoq PE=1 SV=2	1.06242e+07	1.28391e+07	1.17647e+07	1.06123e+07	1.09937e+07	1.51652e+07	1.07486e+07	1.17731e+07	1.32457e+07	1.30605e+07	1.03798e+07	1.03997e+07	1.13287e+07	1.10216e+07	1.17228e+07	1.33709e+07	1.374e+07	1.56656e+07	1.34624e+07	1.27394e+07
P55264	14	951.92	Adk	0.952422	0.478878	0.885218	0.045371	0.980786	0.609231	P55264|ADK_MOUSE Adenosine kinase OS=Mus musculus GN=Adk PE=1 SV=2	1.50087e+07	1.59073e+07	1.50473e+07	1.55728e+07	1.36311e+07	1.55152e+07	1.33449e+07	1.18731e+07	1.69619e+07	1.3896e+07	1.43605e+07	1.53866e+07	1.59864e+07	1.63495e+07	1.45569e+07	1.4638e+07	1.13858e+07	1.29652e+07	1.40519e+07	1.4802e+07
Q8BGK2	13	819.32	Adprhl1	1.09724	0.0892403	0.984324	0.79911	0.976113	0.746463	Q8BGK2|ARHL1_MOUSE [Protein ADP-ribosylarginine] hydrolase-like protein 1 OS=Mus musculus GN=Adprhl1 PE=1 SV=1	2.73339e+07	3.02477e+07	2.37624e+07	2.97387e+07	3.05386e+07	3.12579e+07	3.20095e+07	2.8822e+07	3.25301e+07	3.07733e+07	2.85219e+07	2.93574e+07	2.85293e+07	3.4009e+07	2.46693e+07	2.97139e+07	2.7044e+07	2.61264e+07	2.90013e+07	3.09271e+07
Q9JKV1	1	35.54	Adrm1	1.02965	0.757299	1.16038	0.280489	1.06414	0.594613	Q9JKV1|ADRM1_MOUSE Proteasomal ubiquitin receptor ADRM1 OS=Mus musculus GN=Adrm1 PE=1 SV=2	378749	506683	325901	466045	428207	383761	420122	514867	404698	444560	483702	483993	307944	389582	313450	430614	565484	363158	402847	533900
P54822	5	233.63	Adsl	0.756531	0.00260369	1.16314	0.0436234	1.11114	0.233103	P54822|PUR8_MOUSE Adenylosuccinate lyase OS=Mus musculus GN=Adsl PE=1 SV=2	5.55918e+06	7.24838e+06	6.68259e+06	7.24198e+06	6.04031e+06	5.55336e+06	4.71564e+06	4.68761e+06	4.78568e+06	5.05107e+06	6.58494e+06	6.84896e+06	5.4006e+06	4.75884e+06	5.90103e+06	6.641e+06	6.50999e+06	7.17158e+06	7.06171e+06	6.92179e+06
P28650;P46664	12	640.93	Adssl1	1.03961	0.606507	1.07002	0.273959	0.984823	0.859601	P28650|PURA1_MOUSE Adenylosuccinate synthetase isozyme 1 OS=Mus musculus GN=Adssl1 PE=1 SV=2	1.06235e+07	1.27192e+07	1.07461e+07	1.06386e+07	1.25448e+07	9.84894e+06	1.16235e+07	1.14473e+07	1.25306e+07	1.40907e+07	1.05982e+07	1.1112e+07	1.41735e+07	1.17578e+07	1.05134e+07	1.25175e+07	1.2427e+07	1.26896e+07	1.18269e+07	1.27658e+07
Q8JZQ2;Q920A7	11	526.46	Afg3l2	1.16815	0.279048	0.890808	0.22297	0.92094	0.464448	Q8JZQ2|AFG32_MOUSE AFG3-like protein 2 OS=Mus musculus GN=Afg3l2 PE=1 SV=1	3.4584e+06	3.47567e+06	3.13125e+06	2.4243e+06	2.25438e+06	4.48941e+06	3.83182e+06	2.76276e+06	2.66271e+06	3.47644e+06	2.66311e+06	2.76335e+06	3.80644e+06	3.16003e+06	3.6168e+06	2.34991e+06	2.78744e+06	2.9662e+06	3.13454e+06	3.02352e+06
O89020	4	94.95	Afm	0.905804	0.430427	1.41672	0.022575	1.21838	0.140718	O89020|AFAM_MOUSE Afamin OS=Mus musculus GN=Afm PE=1 SV=2	365502	441410	506875	486261	586001	400380	364090	559049	489453	348321	348519	405542	282319	417110	504882	526330	544869	717984	539387	445899
Q64191	1	29.41	Aga	1.46782	0.359346	1.15718	0.614022	0.995334	0.697583	Q64191|ASPG_MOUSE N(4)-(beta-N-acetylglucosaminyl)-L-asparaginase OS=Mus musculus GN=Aga PE=1 SV=1	56624.5	60950.5	86621.5	89322.9	69952.1	4797.43	152370	44484.2	176720	155140	28412.4	48349.8	126278	102970	59164.6	82853.5	43695.9	80239	119504	96281.4
Q9ESW4	2	76.74	Agk	0.855855	0.00926054	0.832315	0.152594	1.00144	0.868765	Q9ESW4|AGK_MOUSE Acylglycerol kinase, mitochondrial OS=Mus musculus GN=Agk PE=1 SV=1	2.99485e+08	2.44139e+08	2.77337e+08	2.70997e+08	3.01502e+08	2.21609e+08	2.48835e+08	2.40828e+08	2.31563e+08	2.49763e+08	3.00624e+08	2.56617e+08	2.96877e+08	3.4839e+08	1.88949e+08	2.35211e+08	1.90947e+08	2.19408e+08	2.46601e+08	2.65963e+08
Q9D517	1	25.94	Agpat3	1.32811	0.549925	1.27685	0.448309	1.23475	0.582036	Q9D517|PLCC_MOUSE 1-acyl-sn-glycerol-3-phosphate acyltransferase gamma OS=Mus musculus GN=Agpat3 PE=1 SV=2	75210.4	88254.6	33769.3	20975.6	17439	78917.1	125207	50496.9	1907.51	56439.2	3927.25	41300.7	56976.5	24074.8	64568.8	23529.1	47108.5	50066	69132	53849.1
A2ASQ1	7	399.21	Agrn	1.53475	0.01457	2.45826	1.86503e-05	1.19583	0.201155	A2ASQ1|AGRIN_MOUSE Agrin OS=Mus musculus GN=Agrn PE=1 SV=1	1.08097e+06	1.7565e+06	1.25676e+06	1.04919e+06	1.02661e+06	1.65356e+06	1.43135e+06	2.34499e+06	2.12637e+06	1.91322e+06	1.09452e+06	977431	878886	939789	1.26901e+06	2.66061e+06	2.51078e+06	2.40282e+06	3.01873e+06	2.09082e+06
P11859	2	82.28	Agt	1.016	0.912578	1.35234	0.0651406	1.32662	0.0869898	P11859|ANGT_MOUSE Angiotensinogen OS=Mus musculus GN=Agt PE=1 SV=1	179417	127868	270369	182560	148408	176716	185426	176887	215014	169113	132950	151420	130001	132968	137578	198304	204255	250526	150493	122663
O35423	1	13.19	Agxt	0.11041	0.000278414	7.47291	0.00389768	8.30023	0.000106028	O35423|SPYA_MOUSE Serine--pyruvate aminotransferase, mitochondrial OS=Mus musculus GN=Agxt PE=1 SV=3	481600	714651	278933	661770	609501	37572.4	104490	97875	36231.2	27068	37191.8	58655.6	74649	29646.5	130746	591596	796682	552953	346319	185157
Q8CJF7	1	14.03	Ahctf1	1.39368	0.316623	1.30858	0.044362	0.792455	0.136119	Q8CJF7|ELYS_MOUSE Protein ELYS OS=Mus musculus GN=Ahctf1 PE=1 SV=1	50426.1	77265	51867.2	59575.7	46101.3	3032.92	108458	108061	105635	72340.4	60497.1	82176.4	83374.5	83649.2	50241.5	82264.2	112540	105212	87987.2	83004
P50247;Q68FL4	7	324.88	Ahcy	0.995244	0.945393	1.03852	0.417037	1.01309	0.741396	P50247|SAHH_MOUSE Adenosylhomocysteinase OS=Mus musculus GN=Ahcy PE=1 SV=3	4.51408e+06	4.10048e+06	4.51178e+06	4.54258e+06	4.48679e+06	3.63831e+06	4.33555e+06	4.01796e+06	4.78579e+06	5.27273e+06	4.04655e+06	5.01269e+06	4.40402e+06	4.46535e+06	3.94075e+06	4.41297e+06	4.74936e+06	4.51112e+06	4.49292e+06	4.54532e+06
Q6PAL7	1	19.84	Ahdc1	1.15659	0.156375	0.952823	0.698571	0.998936	0.952626	Q6PAL7|AHDC1_MOUSE AT-hook DNA-binding motif-containing protein 1 OS=Mus musculus GN=Ahdc1 PE=1 SV=1	254312	221153	275365	237507	207035	318421	312073	204266	286155	261636	237615	307482	220943	193582	237024	184897	182132	284842	266722	221599
Q8BK64	5	272.91	Ahsa1	1.09819	0.00976256	1.27574	0.0282432	1.08812	0.301637	Q8BK64|AHSA1_MOUSE Activator of 90 kDa heat shock protein ATPase homolog 1 OS=Mus musculus GN=Ahsa1 PE=1 SV=2	1.21465e+06	1.26523e+06	1.22e+06	1.16839e+06	1.28725e+06	1.34006e+06	1.38057e+06	1.27003e+06	1.44489e+06	1.32441e+06	1.23528e+06	1.0323e+06	1.23881e+06	819910	1.33072e+06	1.67529e+06	1.30971e+06	1.54033e+06	1.30394e+06	1.38764e+06
P29699	14	1205.44	Ahsg	1.08725	0.278849	1.2785	0.0024288	1.08798	0.09324	P29699|FETUA_MOUSE Alpha-2-HS-glycoprotein OS=Mus musculus GN=Ahsg PE=1 SV=1	8.7391e+07	8.74741e+07	9.24315e+07	8.45239e+07	7.35814e+07	1.05321e+08	7.82664e+07	9.49118e+07	1.03095e+08	8.09244e+07	7.5259e+07	7.63832e+07	7.97643e+07	7.59352e+07	8.36608e+07	8.48377e+07	1.01773e+08	1.14302e+08	1.02016e+08	9.69693e+07
Q9Z0X1	21	1446.88	Aifm1	0.995008	0.874251	0.905183	0.0109137	0.976175	0.503448	Q9Z0X1|AIFM1_MOUSE Apoptosis-inducing factor 1, mitochondrial OS=Mus musculus GN=Aifm1 PE=1 SV=1	7.15839e+07	6.44019e+07	6.77232e+07	6.56839e+07	6.97602e+07	6.6828e+07	6.99303e+07	6.1842e+07	6.7715e+07	7.11448e+07	7.26187e+07	6.78988e+07	6.99954e+07	7.36886e+07	6.32292e+07	6.42158e+07	6.05821e+07	6.20299e+07	6.4497e+07	6.31637e+07
P31230	7	336.24	Aimp1	1.23573	0.0326244	0.87967	0.0272224	0.779769	0.000468507	P31230|AIMP1_MOUSE Aminoacyl tRNA synthase complex-interacting multifunctional protein 1 OS=Mus musculus GN=Aimp1 PE=1 SV=2	3.64809e+06	3.74103e+06	3.88232e+06	3.66901e+06	3.98489e+06	5.65896e+06	3.57466e+06	4.42998e+06	4.87442e+06	4.84868e+06	5.10455e+06	4.78092e+06	4.31272e+06	4.6319e+06	5.44035e+06	4.63932e+06	4.07919e+06	4.18989e+06	4.21305e+06	4.22854e+06
Q8R010	1	13.31	Aimp2	1.10344	0.250026	1.19231	0.195355	1.10311	0.330257	Q8R010|AIMP2_MOUSE Aminoacyl tRNA synthase complex-interacting multifunctional protein 2 OS=Mus musculus GN=Aimp2 PE=1 SV=2	297022	215598	317036	239412	252082	333914	266728	292784	274033	290350	233591	219905	269267	273117	201776	276669	373947	208232	242591	326536
Q9R0Y5	11	1455.53	Ak1	0.818131	0.0588519	0.875592	0.0684025	0.99974	0.982375	Q9R0Y5|KAD1_MOUSE Adenylate kinase isoenzyme 1 OS=Mus musculus GN=Ak1 PE=1 SV=1	1.49767e+08	2.03288e+08	1.6788e+08	2.10499e+08	1.99515e+08	1.83218e+08	1.35583e+08	1.68416e+08	1.42611e+08	1.3181e+08	1.97364e+08	2.0883e+08	1.51709e+08	1.73927e+08	1.9936e+08	1.70898e+08	1.62183e+08	1.515e+08	1.59625e+08	1.71137e+08
Q9WTP6	7	248.92	Ak2	0.925835	0.127508	0.950288	0.0671542	1.02496	0.569687	Q9WTP6|KAD2_MOUSE Adenylate kinase 2, mitochondrial OS=Mus musculus GN=Ak2 PE=1 SV=5	1.27339e+07	1.12017e+07	1.19573e+07	1.11255e+07	1.04613e+07	1.15757e+07	1.02363e+07	1.01256e+07	1.12254e+07	1.00538e+07	1.16116e+07	1.09088e+07	1.15469e+07	1.15161e+07	1.04966e+07	1.08455e+07	1.08913e+07	1.08233e+07	1.0109e+07	1.06232e+07
Q9WTP7	8	629.75	Ak3	0.987513	0.921914	0.893336	0.00823097	0.933758	0.0811535	Q9WTP7|KAD3_MOUSE GTP:AMP phosphotransferase AK3, mitochondrial OS=Mus musculus GN=Ak3 PE=1 SV=3	1.54017e+07	1.73244e+07	1.63134e+07	1.74106e+07	1.7595e+07	2.41317e+07	1.42178e+07	1.22538e+07	1.54824e+07	1.691e+07	1.78054e+07	1.69366e+07	1.87331e+07	1.73376e+07	1.91947e+07	1.69187e+07	1.66052e+07	1.53053e+07	1.51797e+07	1.63979e+07
Q9WUR9	8	287.72	Ak4	1.06238	0.480165	0.926745	0.166666	0.997802	0.989521	Q9WUR9|KAD4_MOUSE Adenylate kinase 4, mitochondrial OS=Mus musculus GN=Ak4 PE=1 SV=1	5.63893e+06	6.75239e+06	6.56613e+06	5.76958e+06	5.8453e+06	7.97782e+06	6.08554e+06	5.20359e+06	6.27581e+06	6.93654e+06	5.70288e+06	5.68832e+06	6.58224e+06	5.65122e+06	7.01502e+06	5.66358e+06	5.54468e+06	5.72794e+06	5.48349e+06	5.97549e+06
O08715	2	102.19	Akap1	1.72754	0.027494	0.776948	0.0787698	0.528075	0.00142475	O08715|AKAP1_MOUSE A-kinase anchor protein 1, mitochondrial OS=Mus musculus GN=Akap1 PE=1 SV=4	90013	75332	77779.9	143100	130174	118502	187907	245282	128958	211451	191729	188731	223512	205261	168655	91133.5	129743	151765	199316	187810
Q9WTQ5	6	184.6	Akap12	0.601594	0.128168	1.22894	0.568972	2.19875	0.0276192	Q9WTQ5|AKA12_MOUSE A-kinase anchor protein 12 OS=Mus musculus GN=Akap12 PE=1 SV=1	2.50211e+06	5.80449e+06	3.75034e+06	2.83828e+06	2.06572e+06	744850	1.94168e+06	2.69994e+06	1.54632e+06	3.27081e+06	1.21881e+06	1.1613e+06	3.7122e+06	666626	954980	1.88604e+06	1.85139e+06	2.57597e+06	1.99761e+06	1.16894e+06
O54931	8	361.15	Akap2	0.866135	0.318411	1.1233	0.12205	1.06883	0.741762	O54931|AKAP2_MOUSE A-kinase anchor protein 2 OS=Mus musculus GN=Akap2 PE=1 SV=3	1.32459e+06	2.00735e+06	1.50135e+06	2.12894e+06	2.54465e+06	1.58071e+06	1.38663e+06	1.96567e+06	1.62467e+06	1.67656e+06	1.98342e+06	1.96348e+06	1.67259e+06	1.46963e+06	1.80559e+06	2.26528e+06	1.77361e+06	2.08726e+06	1.93306e+06	1.93226e+06
Q9DBR0	1	51.9	Akap8	2.54448	0.00327972	0.747071	0.228465	0.353743	0.0124297	Q9DBR0|AKAP8_MOUSE A-kinase anchor protein 8 OS=Mus musculus GN=Akap8 PE=1 SV=1	9493.52	12240.7	20023.8	35526.7	65981.9	77298.1	76810.1	63456.4	70686.4	76288.8	40740.8	93339.7	96225	84065.4	90630.7	34105	77434.2	79146.3	82923.2	28956.4
Q9JII6	6	276.11	Akr1a1	0.995909	0.951904	1.24794	0.000953576	1.16299	0.0137354	Q9JII6|AK1A1_MOUSE Alcohol dehydrogenase [NADP(+)] OS=Mus musculus GN=Akr1a1 PE=1 SV=3	2.72207e+06	2.47866e+06	2.94861e+06	2.71649e+06	2.31861e+06	2.21329e+06	2.52929e+06	2.54153e+06	2.91005e+06	2.93634e+06	2.1478e+06	2.41229e+06	2.31024e+06	2.30967e+06	2.1567e+06	2.97149e+06	2.92037e+06	3.06506e+06	2.60544e+06	2.5852e+06
P45376;Q8VC28	14	747.4	Akr1b1	0.954009	0.351732	1.01651	0.718929	1.00637	0.876635	P45376|ALDR_MOUSE Aldose reductase OS=Mus musculus GN=Akr1b1 PE=1 SV=3	1.01996e+08	9.5559e+07	9.61898e+07	9.08494e+07	8.62005e+07	9.60146e+07	8.17865e+07	8.11041e+07	9.69627e+07	9.32744e+07	9.5872e+07	9.57804e+07	9.92976e+07	9.78508e+07	7.90156e+07	9.09563e+07	9.30569e+07	9.23567e+07	9.88417e+07	1.0033e+08
P21300	2	151.4	Akr1b7	0.988458	0.913171	0.894961	0.0758585	1.01103	0.983763	P21300|ALD1_MOUSE Aldose reductase-related protein 1 OS=Mus musculus GN=Akr1b7 PE=1 SV=4	3.07635e+06	1.97879e+06	2.34884e+06	2.60236e+06	2.38266e+06	2.81085e+06	2.936e+06	2.0161e+06	2.21352e+06	2.26955e+06	2.37636e+06	2.41821e+06	2.67565e+06	2.40101e+06	2.38261e+06	1.99436e+06	1.99108e+06	2.53963e+06	2.38322e+06	2.05841e+06
P45377	3	273.02	Akr1b8	0.954179	0.477495	0.862347	0.0968833	0.913011	0.150052	P45377|ALD2_MOUSE Aldose reductase-related protein 2 OS=Mus musculus GN=Akr1b8 PE=1 SV=2	4.38873e+06	3.59855e+06	4.0294e+06	3.77711e+06	3.89656e+06	3.96243e+06	4.3327e+06	3.09517e+06	3.70486e+06	3.69296e+06	4.62333e+06	3.93967e+06	4.58105e+06	4.65435e+06	3.76799e+06	3.44773e+06	3.04097e+06	3.95349e+06	4.5402e+06	3.61531e+06
Q9DCT1	4	163.51	Akr1e2	1.02805	0.807186	1.03138	0.666652	0.897699	0.186114	Q9DCT1|AKCL2_MOUSE 1,5-anhydro-D-fructose reductase OS=Mus musculus GN=Akr1e2 PE=1 SV=1	987628	1.13173e+06	1.30418e+06	991629	1.07105e+06	724339	1.32224e+06	1.15366e+06	1.29633e+06	1.14356e+06	1.10118e+06	1.12684e+06	1.38e+06	1.39148e+06	1.11193e+06	1.17509e+06	1.34187e+06	1.42154e+06	1.23572e+06	1.129e+06
Q8CG76	9	410.75	Akr7a2	1.1569	0.159016	0.855334	0.0110835	0.926793	0.146583	Q8CG76|ARK72_MOUSE Aflatoxin B1 aldehyde reductase member 2 OS=Mus musculus GN=Akr7a2 PE=1 SV=3	9.97116e+06	8.92839e+06	8.96381e+06	9.26768e+06	8.9914e+06	1.25959e+07	1.01743e+07	7.99114e+06	1.28285e+07	9.76946e+06	1.08066e+07	1.0025e+07	1.05469e+07	9.83726e+06	8.54991e+06	8.14133e+06	7.98987e+06	8.65773e+06	9.05581e+06	8.72154e+06
Q60823	1	13.87	Akt2	0.669602	0.438681	1.63058	0.0930169	1.15419	0.607051	Q60823|AKT2_MOUSE RAC-beta serine/threonine-protein kinase OS=Mus musculus GN=Akt2 PE=1 SV=1	7459.07	13550	8113.27	19563.8	17737.5	0	4328.65	16131.9	24016.9	0	11068.6	17761.1	7846.48	5456.22	15417.5	30172	13294.8	14205.4	16768.3	19399.5
P10518	5	276.17	Alad	0.929178	0.537827	0.946414	0.334019	1.0077	0.964099	P10518|HEM2_MOUSE Delta-aminolevulinic acid dehydratase OS=Mus musculus GN=Alad PE=1 SV=1	3.10146e+06	2.54381e+06	3.20741e+06	2.04229e+06	2.29283e+06	2.51298e+06	2.12635e+06	1.94429e+06	2.80605e+06	2.86413e+06	2.63861e+06	2.36953e+06	2.75465e+06	2.89579e+06	2.4285e+06	2.51904e+06	2.11751e+06	2.5933e+06	2.66003e+06	2.49592e+06
P07724	68	6042.42	Alb	1.37536	0.000258316	1.29828	0.00191778	0.970588	0.571467	P07724|ALBU_MOUSE Serum albumin OS=Mus musculus GN=Alb PE=1 SV=3	4.7906e+09	5.1106e+09	5.39486e+09	4.91437e+09	5.78738e+09	7.66034e+09	6.6518e+09	7.25374e+09	7.73309e+09	6.45734e+09	5.31863e+09	4.91408e+09	4.96005e+09	5.9375e+09	5.65537e+09	6.42446e+09	7.19913e+09	7.81258e+09	7.15172e+09	6.18737e+09
P24549	6	511.24	Aldh1a1	1.08765	0.502127	1.58359	0.000285154	1.3305	0.0374995	P24549|AL1A1_MOUSE Retinal dehydrogenase 1 OS=Mus musculus GN=Aldh1a1 PE=1 SV=5	2.72604e+06	2.3049e+06	3.96363e+06	2.85361e+06	2.41738e+06	3.37299e+06	3.62757e+06	2.46364e+06	3.1347e+06	2.917e+06	1.75568e+06	2.28553e+06	2.17512e+06	2.10514e+06	2.40043e+06	3.43797e+06	3.80154e+06	3.68217e+06	2.8274e+06	3.23006e+06
Q9CZS1	5	358.47	Aldh1b1	1.05579	0.746042	0.990456	0.959878	1.03297	0.674244	Q9CZS1|AL1B1_MOUSE Aldehyde dehydrogenase X, mitochondrial OS=Mus musculus GN=Aldh1b1 PE=1 SV=1	2.97586e+06	2.9515e+06	3.68148e+06	2.66296e+06	3.04411e+06	2.94372e+06	2.48426e+06	2.54777e+06	3.09104e+06	5.10359e+06	1.75091e+06	2.76434e+06	3.04686e+06	2.92961e+06	4.3354e+06	3.26537e+06	4.1703e+06	2.17805e+06	2.63581e+06	2.43606e+06
P47738;Q62148;Q9JHW9	22	1405.67	Aldh2	0.908715	0.00334542	1.03057	0.35053	1.08373	0.0342397	P47738|ALDH2_MOUSE Aldehyde dehydrogenase, mitochondrial OS=Mus musculus GN=Aldh2 PE=1 SV=1	1.46532e+08	1.37296e+08	1.52873e+08	1.43442e+08	1.44466e+08	1.24868e+08	1.34389e+08	1.31454e+08	1.31011e+08	1.36741e+08	1.3051e+08	1.47038e+08	1.34417e+08	1.31551e+08	1.2511e+08	1.38284e+08	1.39237e+08	1.33471e+08	1.34091e+08	1.4398e+08
Q8CHT0	21	1427.67	Aldh4a1	0.888076	0.0141356	0.812233	0.00618314	0.914831	0.130196	Q8CHT0|AL4A1_MOUSE Delta-1-pyrroline-5-carboxylate dehydrogenase, mitochondrial OS=Mus musculus GN=Aldh4a1 PE=1 SV=3	7.91929e+07	7.76047e+07	7.54119e+07	7.45023e+07	7.22215e+07	6.51079e+07	7.67494e+07	6.30945e+07	6.66886e+07	6.4881e+07	8.13842e+07	8.10598e+07	9.13026e+07	9.03846e+07	7.00799e+07	6.1591e+07	6.68323e+07	6.74197e+07	6.81597e+07	7.24331e+07
Q8BWF0	11	990.78	Aldh5a1	1.06915	0.193868	0.768708	9.61055e-05	0.877046	0.0311923	Q8BWF0|SSDH_MOUSE Succinate-semialdehyde dehydrogenase, mitochondrial OS=Mus musculus GN=Aldh5a1 PE=1 SV=1	1.70427e+07	1.31765e+07	1.63609e+07	1.59393e+07	1.48031e+07	1.68983e+07	1.69917e+07	1.53189e+07	1.63544e+07	1.71063e+07	1.79253e+07	1.66649e+07	1.91303e+07	1.69327e+07	1.75092e+07	1.33917e+07	1.23836e+07	1.33097e+07	1.42525e+07	1.44338e+07
Q9EQ20	26	2128.92	Aldh6a1	0.983415	0.731055	0.82412	4.66856e-05	0.924504	0.0177456	Q9EQ20|MMSA_MOUSE Methylmalonate-semialdehyde dehydrogenase [acylating], mitochondrial OS=Mus musculus GN=Aldh6a1 PE=1 SV=1	1.698e+08	1.5645e+08	1.67293e+08	1.6871e+08	1.78036e+08	1.90444e+08	1.65163e+08	1.4743e+08	1.59463e+08	1.63853e+08	1.86468e+08	1.90626e+08	1.78491e+08	1.79632e+08	1.73693e+08	1.53089e+08	1.43939e+08	1.48853e+08	1.44804e+08	1.58364e+08
Q9DBF1	2	93.49	Aldh7a1	0.834709	0.157774	0.975504	0.846311	1.23046	0.0951364	Q9DBF1|AL7A1_MOUSE Alpha-aminoadipic semialdehyde dehydrogenase OS=Mus musculus GN=Aldh7a1 PE=1 SV=4	835012	799114	740188	532220	691783	689339	647636	401523	698977	566072	508164	520385	600748	764721	530349	549204	389934	560092	699726	653776
Q9JLJ2	4	147.24	Aldh9a1	0.983851	0.802394	0.816422	0.000663601	0.863458	0.0148741	Q9JLJ2|AL9A1_MOUSE 4-trimethylaminobutyraldehyde dehydrogenase OS=Mus musculus GN=Aldh9a1 PE=1 SV=1	727853	791815	811895	916692	777283	698980	814397	724009	799763	923381	920605	931152	948337	1.01607e+06	845950	826307	746968	750638	736678	745661
P05064;P05063	47	3113.02	Aldoa	1.02982	0.547644	1.18549	0.0111986	1.08544	0.147593	P05064|ALDOA_MOUSE Fructose-bisphosphate aldolase A OS=Mus musculus GN=Aldoa PE=1 SV=2	9.33168e+08	9.26686e+08	9.85778e+08	1.01252e+09	1.04896e+09	9.57698e+08	8.98281e+08	1.00469e+09	1.13115e+09	1.06161e+09	1.00152e+09	8.86657e+08	9.58552e+08	9.15971e+08	7.58165e+08	1.16946e+09	1.08787e+09	1.08593e+09	1.00809e+09	1.00809e+09
Q91Y97	3	167.88	Aldob	0.349354	0.0302387	0.234203	1.62108e-06	0.774161	0.159453	Q91Y97|ALDOB_MOUSE Fructose-bisphosphate aldolase B OS=Mus musculus GN=Aldob PE=1 SV=3	1.17901e+06	358940	1.0459e+06	455796	578675	195360	424237	112469	104831	427180	920700	895588	962763	890122	1.0047e+06	68272.6	117542	266782	303204	338834
O08583	3	193.17	Alyref	1.33928	0.0988985	1.55294	0.0103787	0.83183	0.201374	O08583|THOC4_MOUSE THO complex subunit 4 OS=Mus musculus GN=Alyref PE=1 SV=3	571823	561746	313875	752158	718729	868934	656990	1.00392e+06	601528	777103	700766	727465	779842	694382	605873	1.1069e+06	1.36473e+06	1.24572e+06	1.03058e+06	700280
O09174	5	172.61	Amacr	0.829988	0.0221593	0.937835	0.438928	0.994644	0.877464	O09174|AMACR_MOUSE Alpha-methylacyl-CoA racemase OS=Mus musculus GN=Amacr PE=1 SV=4	3.24493e+06	2.76094e+06	3.40229e+06	3.16053e+06	3.39991e+06	2.17598e+06	3.01524e+06	2.43596e+06	2.84559e+06	2.78099e+06	3.05529e+06	3.06722e+06	3.41463e+06	3.36453e+06	3.15292e+06	3.41532e+06	3.59204e+06	2.73576e+06	2.2962e+06	3.01724e+06
Q07456	1	17.48	Ambp	1.26424	0.27614	2.0293	0.0038311	1.3026	0.386296	Q07456|AMBP_MOUSE Protein AMBP OS=Mus musculus GN=Ambp PE=1 SV=2	216046	103475	225730	119141	83246.9	215690	126708	199017	210900	192877	112435	97368.6	111867	93669.5	158617	179543	295024	285510	242537	162119
Q8BZQ7	1	15.27	Anapc2	0.545449	0.00320412	1.24393	0.185098	1.56457	0.00213219	Q8BZQ7|ANC2_MOUSE Anaphase-promoting complex subunit 2 OS=Mus musculus GN=Anapc2 PE=1 SV=2	2.29902e+06	2.16387e+06	2.44458e+06	2.27393e+06	2.23482e+06	2.20474e+06	821982	1.01589e+06	1.15532e+06	1.02903e+06	1.79609e+06	1.69024e+06	1.38884e+06	995620	1.42594e+06	2.29011e+06	2.13888e+06	1.96718e+06	1.42095e+06	1.25954e+06
Q8R0Z6	1	16.17	Angptl6	1.15284	0.599366	0.960366	0.741899	0.816999	0.375407	Q8R0Z6|ANGL6_MOUSE Angiopoietin-related protein 6 OS=Mus musculus GN=Angptl6 PE=2 SV=1	1.10861e+06	702752	35484.1	799898	779115	559681	795210	732329	849323	1.01292e+06	1.05756e+06	962274	793693	861340	518354	709908	804838	772538	909878	829864
Q02357	2	92.75	Ank1	0.692747	0.41355	1.78651	0.245398	1.1591	0.822044	Q02357|ANK1_MOUSE Ankyrin-1 OS=Mus musculus GN=Ank1 PE=1 SV=2	53164.3	108227	141758	43537.1	30261.5	19334.5	98327.3	20393.6	83957.5	39117	34143.3	37830.2	60361.9	79658.9	113215	31613.4	167060	233252	41813.3	107252
Q8C8R3	6	325.22	Ank2	1.63972	0.00859577	0.78656	0.294093	0.71707	0.129974	Q8C8R3|ANK2_MOUSE Ankyrin-2 OS=Mus musculus GN=Ank2 PE=1 SV=2	856350	757346	869347	793718	974276	850974	1.47748e+06	1.37666e+06	1.47281e+06	1.79258e+06	846988	911800	2.01902e+06	923798	1.22674e+06	903084	794471	909111	921288	1.13504e+06
G5E8K5	1	98.26	Ank3	1.9651	0.0250036	0.446724	0.0966638	0.577641	0.16908	G5E8K5|ANK3_MOUSE Ankyrin-3 OS=Mus musculus GN=Ank3 PE=1 SV=1	99763.9	75313	76208.3	94960.1	49820.8	201340	107790	235581	109869	123731	63495.5	81819.6	289941	119511	130894	60566.9	64787.2	52623.3	53389.5	74934.7
Q6P1H6	1	16.37	Ankle2	0.312587	0.0591984	3.38596	0.0567724	4.01009	0.0110761	Q6P1H6|ANKL2_MOUSE Ankyrin repeat and LEM domain-containing protein 2 OS=Mus musculus GN=Ankle2 PE=1 SV=2	144269	637991	247032	565329	825719	8794.28	37343.8	469725	80393.2	160311	52504.3	97955.1	201179	136167	115756	675408	674177	454338	199778	39936.1
Q9CR42	3	181.67	Ankrd1	1.57993	0.0953999	2.00403	8.17174e-05	1.16704	0.514352	Q9CR42|ANKR1_MOUSE Ankyrin repeat domain-containing protein 1 OS=Mus musculus GN=Ankrd1 PE=1 SV=1	180278	321249	207939	425788	244524	624358	322003	234753	439921	558910	182104	238754	188709	284394	288332	507401	483571	535991	429636	412756
O35381;Q64G17	5	402.48	Anp32a	1.31128	0.00447176	1.08784	0.356298	0.91757	0.428784	O35381|AN32A_MOUSE Acidic leucine-rich nuclear phosphoprotein 32 family member A OS=Mus musculus GN=Anp32a PE=1 SV=1	5.58321e+06	5.90333e+06	6.23129e+06	6.35203e+06	6.46582e+06	8.97127e+06	6.33177e+06	8.68684e+06	8.07606e+06	7.97496e+06	7.11653e+06	6.51566e+06	5.39699e+06	5.65442e+06	8.59526e+06	7.49322e+06	7.5207e+06	7.51239e+06	6.75998e+06	6.91569e+06
Q9EST5	1	72.32	Anp32b	1.17221	0.055217	1.12853	0.156167	0.835681	0.0779862	Q9EST5|AN32B_MOUSE Acidic leucine-rich nuclear phosphoprotein 32 family member B OS=Mus musculus GN=Anp32b PE=1 SV=1	304720	307704	286640	392296	315216	398497	323490	387592	356758	416902	427808	387898	384008	294035	428726	414771	492948	467235	408938	385685
P97822	2	138.27	Anp32e	0.964436	0.76883	1.15153	0.109236	1.20269	0.0862247	P97822|AN32E_MOUSE Acidic leucine-rich nuclear phosphoprotein 32 family member E OS=Mus musculus GN=Anp32e PE=1 SV=2	787238	636574	589335	819877	617893	694647	633879	835435	438628	725601	596725	639580	455150	532034	645848	737057	641047	734810	611972	579256
P97449	1	43.92	Anpep	0.426997	0.0212334	1.02798	0.905088	0.982177	0.766502	P97449|AMPN_MOUSE Aminopeptidase N OS=Mus musculus GN=Anpep PE=1 SV=4	40590.2	105455	74244.4	52555.1	66468	57228.1	28547	22731.8	8197.54	28181.2	57978.7	57518.4	67502.1	72046.6	90424.8	29540.8	115814	87488.8	64202.1	58091.7
P10107;A2BH40	8	498	Anxa1	1.34618	0.0199496	1.56959	0.00697161	1.01271	0.876365	P10107|ANXA1_MOUSE Annexin A1 OS=Mus musculus GN=Anxa1 PE=1 SV=2	2.27543e+06	1.98914e+06	2.62322e+06	2.97301e+06	2.00087e+06	3.876e+06	2.87624e+06	3.29227e+06	3.28133e+06	2.64204e+06	1.81135e+06	2.35146e+06	2.22533e+06	2.07349e+06	3.2511e+06	4.21799e+06	4.4438e+06	3.48792e+06	3.18364e+06	3.05079e+06
P97384	6	358.53	Anxa11	1.11625	0.179669	0.998065	0.976128	1.0171	0.752379	P97384|ANX11_MOUSE Annexin A11 OS=Mus musculus GN=Anxa11 PE=1 SV=2	1.96559e+06	1.69608e+06	1.61191e+06	1.89724e+06	1.69729e+06	2.42138e+06	2.05341e+06	1.71074e+06	1.86061e+06	1.85284e+06	1.74264e+06	1.87389e+06	1.58503e+06	1.86369e+06	1.65375e+06	1.61249e+06	1.78691e+06	1.71237e+06	1.52224e+06	2.06812e+06
P07356	15	663.16	Anxa2	0.996437	0.939555	1.0263	0.553011	1.02003	0.683117	P07356|ANXA2_MOUSE Annexin A2 OS=Mus musculus GN=Anxa2 PE=1 SV=2	2.58366e+07	2.7314e+07	2.58045e+07	2.39866e+07	2.20848e+07	2.63635e+07	2.61184e+07	2.35923e+07	2.29254e+07	2.55814e+07	2.31663e+07	2.4774e+07	2.40086e+07	2.64642e+07	2.4158e+07	2.43637e+07	2.58666e+07	2.21413e+07	2.61881e+07	2.72345e+07
O35639	6	290.63	Anxa3	1.20708	0.0107612	1.16	0.144185	1.06422	0.359083	O35639|ANXA3_MOUSE Annexin A3 OS=Mus musculus GN=Anxa3 PE=1 SV=4	3.04255e+06	2.52323e+06	2.92573e+06	3.07331e+06	3.07154e+06	2.94681e+06	3.70687e+06	3.66943e+06	3.5659e+06	3.77822e+06	2.48677e+06	2.85529e+06	2.39732e+06	2.71124e+06	3.30252e+06	4.01775e+06	2.98416e+06	2.74406e+06	3.21739e+06	2.99031e+06
P97429	9	591.2	Anxa4	1.04024	0.608716	1.14817	0.0810857	1.04721	0.133082	P97429|ANXA4_MOUSE Annexin A4 OS=Mus musculus GN=Anxa4 PE=1 SV=4	3.05447e+06	3.4889e+06	3.28938e+06	3.32471e+06	3.09923e+06	4.17262e+06	3.17516e+06	3.49623e+06	3.31371e+06	2.75309e+06	3.11663e+06	3.1473e+06	3.16843e+06	2.96327e+06	3.12811e+06	4.38373e+06	3.70747e+06	3.1007e+06	3.26017e+06	3.37184e+06
P48036	14	1065.38	Anxa5	0.945861	0.0517631	1.11818	0.0280672	1.0078	0.770734	P48036|ANXA5_MOUSE Annexin A5 OS=Mus musculus GN=Anxa5 PE=1 SV=1	3.4113e+07	3.84433e+07	3.65805e+07	3.61693e+07	3.63787e+07	3.44292e+07	3.24702e+07	3.44124e+07	3.55325e+07	3.50041e+07	3.47232e+07	3.54571e+07	3.511e+07	3.74667e+07	3.75219e+07	4.15498e+07	4.55926e+07	3.82155e+07	3.8253e+07	3.79741e+07
P14824	29	1878.49	Anxa6	1.18981	0.00412831	1.02367	0.64671	0.987563	0.699186	P14824|ANXA6_MOUSE Annexin A6 OS=Mus musculus GN=Anxa6 PE=1 SV=3	7.21232e+07	6.49654e+07	6.53969e+07	6.44042e+07	6.93172e+07	7.96579e+07	8.39585e+07	7.27011e+07	7.52886e+07	8.84176e+07	6.54572e+07	7.24698e+07	6.43874e+07	7.05096e+07	6.76169e+07	7.26817e+07	6.5424e+07	6.07279e+07	7.14489e+07	7.8217e+07
Q07076	8	544.74	Anxa7	1.29477	0.0440204	1.17283	0.0966428	0.930929	0.382122	Q07076|ANXA7_MOUSE Annexin A7 OS=Mus musculus GN=Anxa7 PE=1 SV=2	3.27172e+06	2.87173e+06	2.83642e+06	3.49489e+06	3.28197e+06	5.34397e+06	3.35485e+06	3.35005e+06	4.06318e+06	4.28924e+06	3.3029e+06	3.85648e+06	3.12628e+06	2.81066e+06	3.82949e+06	4.38317e+06	3.80747e+06	3.24152e+06	3.84383e+06	4.57517e+06
O70423	1	45.12	Aoc3	0.975865	0.897903	0.825078	0.60161	0.666918	0.259835	O70423|AOC3_MOUSE Membrane primary amine oxidase OS=Mus musculus GN=Aoc3 PE=1 SV=3	81047	143770	128490	75110.4	92445.1	143339	100087	106394	59699.3	98772.1	84752.5	318178	109339	109530	159200	66127.8	223379	118344	146727	89807.7
O35643;Q9DBG3	7	327.6	Ap1b1	1.52381	0.125438	1.44725	0.099364	1.10973	0.689607	O35643|AP1B1_MOUSE AP-1 complex subunit beta-1 OS=Mus musculus GN=Ap1b1 PE=1 SV=2	823163	661514	759998	282881	467986	1.07879e+06	944242	684437	484508	1.37267e+06	228032	408334	791452	679168	592345	539996	700024	970897	961994	733686
P17427	1	53.51	Ap2a2	2.81329	0.034668	0.462707	0.159004	0.557432	0.585683	P17427|AP2A2_MOUSE AP-2 complex subunit alpha-2 OS=Mus musculus GN=Ap2a2 PE=1 SV=2	32028.3	62391.4	27050.6	20807.9	12950.7	162870	93890	57650.1	47269.4	75024.8	5144.32	30354.2	79745.5	64635.4	98591.7	4605.56	14234.9	22197.9	28461.5	59350.5
P84091	2	81.37	Ap2m1	1.32493	0.170326	1.41537	0.115731	1.08818	0.577414	P84091|AP2M1_MOUSE AP-2 complex subunit mu OS=Mus musculus GN=Ap2m1 PE=1 SV=1	117854	144842	82647.3	101966	85701.4	127310	175858	153922	178589	70518.9	58898.8	89577.4	92989.6	103329	145024	97252.6	90647.4	165094	176323	163958
P62743	1	20.34	Ap2s1	1.31782	0.0252486	1.27112	0.0725128	1.15457	0.24441	P62743|AP2S1_MOUSE AP-2 complex subunit sigma OS=Mus musculus GN=Ap2s1 PE=1 SV=1	221436	210146	230202	192014	164553	236302	276025	233131	252033	344510	128249	138889	199754	240689	174433	205814	235395	211537	261315	207083
Q8R146	6	314.61	Apeh	1.0705	0.510292	1.13783	0.0994326	1.01475	0.756473	Q8R146|APEH_MOUSE Acylamino-acid-releasing enzyme OS=Mus musculus GN=Apeh PE=1 SV=3	2.13117e+06	1.92315e+06	2.18158e+06	1.86939e+06	1.97422e+06	1.65338e+06	2.16665e+06	1.7883e+06	2.66903e+06	2.51279e+06	1.76717e+06	2.03791e+06	1.94429e+06	1.91461e+06	2.26906e+06	2.12647e+06	2.33189e+06	2.68339e+06	1.96296e+06	2.19744e+06
P28352	2	76.46	Apex1	0.879441	0.470383	1.4274	0.0775805	1.16225	0.388321	P28352|APEX1_MOUSE DNA-(apurinic or apyrimidinic site) lyase OS=Mus musculus GN=Apex1 PE=1 SV=2	149917	99497.2	153307	192122	186800	81418.4	144612	162803	112060	186516	101607	97260.7	163251	165134	145273	249034	220343	216025	161398	113162
O35841	2	51.35	Api5	2.06127	0.0193882	1.17072	0.46676	0.865428	0.472132	O35841|API5_MOUSE Apoptosis inhibitor 5 OS=Mus musculus GN=Api5 PE=1 SV=2	137221	109592	117599	65548.8	29061.7	274245	155165	113312	192186	211263	81714.9	93064.2	89968.7	92971.8	172679	101630	74333.5	131813	171647	141525
Q9WVQ5	4	195.32	Apip	0.848141	0.0641323	1.07341	0.489685	1.1404	0.122159	Q9WVQ5|MTNB_MOUSE Methylthioribulose-1-phosphate dehydratase OS=Mus musculus GN=Apip PE=1 SV=1	1.93204e+06	1.74179e+06	1.69818e+06	1.78314e+06	2.15274e+06	1.26834e+06	1.4175e+06	1.81317e+06	1.7445e+06	1.65089e+06	2.0693e+06	1.57418e+06	1.5076e+06	1.39594e+06	1.61493e+06	2.20047e+06	1.71533e+06	1.56026e+06	1.73882e+06	1.5462e+06
Q9D7N9	3	122.69	Apmap	1.20519	0.233304	1.12174	0.298461	1.02011	0.965666	Q9D7N9|APMAP_MOUSE Adipocyte plasma membrane-associated protein OS=Mus musculus GN=Apmap PE=1 SV=1	854788	750441	843246	601355	442757	1.06952e+06	884002	615765	723685	916247	506338	707833	882685	670861	656006	824233	728942	805964	867651	613750
Q00623	17	1019.4	Apoa1	1.05265	0.626164	1.41549	0.010587	1.16875	0.221731	Q00623|APOA1_MOUSE Apolipoprotein A-I OS=Mus musculus GN=Apoa1 PE=1 SV=2	9.72996e+07	1.36532e+08	9.54052e+07	1.12653e+08	1.07907e+08	1.2734e+08	1.12578e+08	1.32632e+08	1.22772e+08	8.34238e+07	9.6978e+07	1.02781e+08	6.04892e+07	9.34966e+07	1.16671e+08	1.08562e+08	1.43294e+08	1.4986e+08	1.26352e+08	1.37799e+08
P09813	1	48.53	Apoa2	0.707787	0.238179	1.23145	0.281304	1.3092	0.237018	P09813|APOA2_MOUSE Apolipoprotein A-II OS=Mus musculus GN=Apoa2 PE=1 SV=2	1.4785e+06	3.0257e+06	1.65012e+06	2.14077e+06	2.58604e+06	679628	2.34564e+06	2.19357e+06	2.05623e+06	426448	2.05643e+06	2.41823e+06	820395	1.85565e+06	1.1606e+06	1.54265e+06	2.03875e+06	2.08959e+06	2.53366e+06	2.03035e+06
P06728	11	586.31	Apoa4	0.937374	0.600758	1.23009	0.112014	1.17661	0.198831	P06728|APOA4_MOUSE Apolipoprotein A-IV OS=Mus musculus GN=Apoa4 PE=1 SV=3	1.48291e+07	1.55991e+07	2.22269e+07	1.74623e+07	1.59583e+07	1.38507e+07	1.24224e+07	1.8637e+07	2.03227e+07	1.54524e+07	1.51325e+07	1.55722e+07	1.20746e+07	1.10283e+07	1.93478e+07	1.60833e+07	1.95167e+07	2.19735e+07	1.61309e+07	1.62835e+07
Q9WV35	7	389.89	Apobec2	1.25781	0.00554474	1.29988	0.0134833	1.06989	0.381916	Q9WV35|ABEC2_MOUSE C->U-editing enzyme APOBEC-2 OS=Mus musculus GN=Apobec2 PE=1 SV=1	6.77579e+06	8.83242e+06	7.51093e+06	8.26996e+06	7.50202e+06	1.07208e+07		9.31053e+06	9.93669e+06	9.16601e+06	6.91816e+06	7.01948e+06	6.39666e+06	6.82545e+06	9.19098e+06	1.0262e+07	9.61457e+06	9.14201e+06	7.75534e+06	1.04776e+07
P34928	1	18.95	Apoc1	1.02299	0.803795	1.48693	0.00294412	1.27903	0.00802075	P34928|APOC1_MOUSE Apolipoprotein C-I OS=Mus musculus GN=Apoc1 PE=1 SV=1	105932	123263	107677	127516	100737	111164	112523	137281	129853	87298.2	94652.2	103221	76387.3	80864.6	86714.7	112077	136388	157126	141486	109909
P08226	9	323.72	Apoe	0.877085	0.203281	1.68815	0.00837499	1.75059	0.000834503	P08226|APOE_MOUSE Apolipoprotein E OS=Mus musculus GN=Apoe PE=1 SV=2	4.49713e+06	4.63484e+06	5.4403e+06	4.13652e+06	3.91693e+06	4.24368e+06	3.97606e+06	3.90868e+06	4.79299e+06	2.92327e+06	2.39777e+06	2.71722e+06	2.5953e+06	1.86724e+06	3.34708e+06	4.0598e+06	5.63429e+06	4.85535e+06	4.36915e+06	2.90012e+06
Q01339	7	260.67	Apoh	1.26296	0.0352774	1.42731	0.000672254	0.975882	0.738392	Q01339|APOH_MOUSE Beta-2-glycoprotein 1 OS=Mus musculus GN=Apoh PE=1 SV=1	5.40184e+06	6.07302e+06	6.32915e+06	6.16805e+06	7.19768e+06		6.36661e+06	9.23609e+06	8.3765e+06	7.51382e+06	7.5084e+06	6.35112e+06	6.34711e+06	6.26471e+06	5.46872e+06	9.16893e+06	9.92539e+06	9.48988e+06	9.3694e+06	7.63489e+06
Q9Z1R3	1	20.46	Apom	2.04447	0.00452871	2.85778	0.00192739	0.802564	0.992903	Q9Z1R3|APOM_MOUSE Apolipoprotein M OS=Mus musculus GN=Apom PE=1 SV=1	14158.5	18924.6	14276.3	16392.4	4620.87	21697.2	28373.8	38039.2	26278.2	25397.6	9441.02	30985.6	5950.78	4783.98	34031.5	46788.9	38916.9	55421.6	49404.5	52930.5
Q9DCZ4	3	98.44	Apoo	1.14515	0.267108	0.739973	0.0234892	0.863686	0.19268	Q9DCZ4|MIC26_MOUSE MICOS complex subunit Mic26 OS=Mus musculus GN=Apoo PE=1 SV=2	7.70837e+06	1.05446e+07	6.98357e+06	9.72156e+06	9.65608e+06	1.15801e+07	1.28733e+07	9.24516e+06	8.53959e+06	8.85172e+06	1.01884e+07	1.08022e+07	8.35076e+06	1.27363e+07	9.57792e+06	7.21599e+06	6.65082e+06	6.13623e+06	8.75182e+06	9.46882e+06
Q78IK4	10	545.57	Apool	0.927083	0.284377	0.849534	0.0986139	1.00043	0.930503	Q78IK4|MIC27_MOUSE MICOS complex subunit Mic27 OS=Mus musculus GN=Apool PE=1 SV=1	2.29004e+07	2.3038e+07	1.9611e+07	2.22098e+07	2.28145e+07	1.84512e+07	2.53181e+07	2.03124e+07	1.87068e+07	1.97224e+07	2.48445e+07	2.27015e+07	1.98616e+07	2.48897e+07	1.82285e+07	1.81063e+07	1.59617e+07	1.6974e+07	2.04217e+07	2.24317e+07
P12023	1	25.84	App	0.621506	0.000147061	0.729566	0.0258185	1.07233	0.465532	P12023|A4_MOUSE Amyloid beta A4 protein OS=Mus musculus GN=App PE=1 SV=3	1.02893e+07	8.73007e+06	9.24045e+06	1.03618e+07	1.0756e+07	4.5984e+06	6.34249e+06	6.99244e+06	6.34743e+06	6.40774e+06	9.98909e+06	1.02011e+07	9.08013e+06	1.08312e+07	5.94568e+06	7.05149e+06	6.38457e+06	7.72516e+06	6.27686e+06	6.15642e+06
Q8K3H0	3	124.27	Appl1	1.06307	0.58621	0.642122	0.022428	0.711425	0.0302069	Q8K3H0|DP13A_MOUSE DCC-interacting protein 13-alpha OS=Mus musculus GN=Appl1 PE=1 SV=1	164655	100361	146976	147763	133787	171858	123404	174642	142308	125068	203297	136377	233108	178973	223109	188034	102478	125061	127105	83303.2
P08030	2	110.67	Aprt	1.00345	0.984288	0.98743	0.925649	1.01069	0.911966	P08030|APT_MOUSE Adenine phosphoribosyltransferase OS=Mus musculus GN=Aprt PE=1 SV=2	241198	227414	230801	295283	159157	347804	257258	182087	169813	200878	167923	172398	260462	242481	298386	236855	278305	217401	185507	209233
Q02013	2	150.29	Aqp1	0.858871	0.471021	1.0493	0.794493	1.27986	0.26814	Q02013|AQP1_MOUSE Aquaporin-1 OS=Mus musculus GN=Aqp1 PE=1 SV=3	1.57097e+06	1.8401e+06	1.47967e+06	901196	912418	1.44402e+06	1.35121e+06	763494	731163	1.46829e+06	601588	1.085e+06	1.22638e+06	1.08635e+06	1.23905e+06	502257	1.36769e+06	1.22371e+06	1.21512e+06	1.18787e+06
Q5XJY5	3	89.34	Arcn1	0.783221	0.0347167	1.31836	0.000657918	1.40081	0.00734883	Q5XJY5|COPD_MOUSE Coatomer subunit delta OS=Mus musculus GN=Arcn1 PE=1 SV=2	407290	512219	501219	401596	330235	321902	311502	311131	364462	376933	290806	350053	329705	286385	279700	422698	389865	442528	391796	378974
P61205;Q8BSL7;P62331	3	360.87	Arf3	1.18776	0.140243	1.18819	0.0582097	0.997991	0.953857	P61205|ARF3_MOUSE ADP-ribosylation factor 3 OS=Mus musculus GN=Arf3 PE=2 SV=2	3.30084e+06	4.31708e+06	4.12801e+06	3.02641e+06	3.35198e+06	4.28044e+06	4.87902e+06	3.14423e+06	4.21122e+06	5.01242e+06	2.97747e+06	3.52629e+06	4.0372e+06	3.56717e+06	4.05269e+06	3.68115e+06	4.13314e+06	4.26366e+06	5.14676e+06	4.35384e+06
P61750	3	273.4	Arf4	2.36025	0.000149104	1.04355	0.826028	0.617548	0.0987727	P61750|ARF4_MOUSE ADP-ribosylation factor 4 OS=Mus musculus GN=Arf4 PE=1 SV=2	378297	341736	452720	265899	222515	755131	943701	778786	614245	828912	226484	572144	700519	582948	607845	411535	553330	453445	771031	617739
P84084	2	282.66	Arf5	1.01342	0.934218	1.43365	0.0297103	1.16928	0.318983	P84084|ARF5_MOUSE ADP-ribosylation factor 5 OS=Mus musculus GN=Arf5 PE=1 SV=2	484666	552169	426984	311338	333547	295665	538169	392388	368878	541910	303918	303684	391217	323057	481543	424397	522956	654745	586319	397063
Q5FWK3	1	35.76	Arhgap1	0.90354	0.477425	1.12479	0.397265	1.08544	0.650709	Q5FWK3|RHG01_MOUSE Rho GTPase-activating protein 1 OS=Mus musculus GN=Arhgap1 PE=1 SV=1	348200	588036	458017	706401	499728	574694	427355	432474	496098	418930	355291	530210	539792	395752	574649	643136	603269	526767	350462	571012
Q8BL80	1	20.26	Arhgap22	0.788976	0.531371	0.465118	0.21826	0.951564	0.621471	Q8BL80|RHG22_MOUSE Rho GTPase-activating protein 22 OS=Mus musculus GN=Arhgap22 PE=1 SV=2	58659.5	127672	56031.2	33167.5	41457.8	88504	61013.2	18451.7	39728.1	42399.1	5420.75	71587.6	105041	21307.4	129767	69954.7	20611.1	18944.1	0	45431.6
Q99PT1	9	452.95	Arhgdia	1.04674	0.40513	1.23968	0.0080305	1.07732	0.242592	Q99PT1|GDIR1_MOUSE Rho GDP-dissociation inhibitor 1 OS=Mus musculus GN=Arhgdia PE=1 SV=3	2.75435e+07	3.18239e+07	3.03013e+07	3.20206e+07	2.81636e+07	3.25465e+07	2.71833e+07	3.00041e+07	3.48904e+07	3.22328e+07	2.68219e+07	2.8492e+07	2.60973e+07	2.42509e+07	3.34357e+07	3.57976e+07	3.47692e+07	3.72825e+07	3.07942e+07	3.37939e+07
Q61599	3	136.02	Arhgdib	0.924236	0.680484	1.93357	0.001926	1.49056	0.0378041	Q61599|GDIR2_MOUSE Rho GDP-dissociation inhibitor 2 OS=Mus musculus GN=Arhgdib PE=1 SV=3	1.00204e+06	978242	1.13781e+06	1.29732e+06	819873	397185	772189	1.23893e+06	1.23244e+06	1.1979e+06	894420	703149	523311	423017	968405	1.46346e+06	1.6971e+06	1.29037e+06	1.15833e+06	1.18203e+06
Q8BW86	1	14.31	Arhgef33	0.578169	0.000111926	1.13001	0.362364	1.22197	0.0278946	Q8BW86|ARG33_MOUSE Rho guanine nucleotide exchange factor 33 OS=Mus musculus GN=Arhgef33 PE=1 SV=3	255453	338782	300918	281034	312614	157386	189339	199120	177121	137813	234916	210910	298865	246723	226951	330195	304488	332281	203267	206538
Q9CQW2;Q8VEH3;Q9EQZ6	2	69.25	Arl8b	1.16464	0.162986	1.22553	0.00107525	1.05108	0.492795	Q9CQW2|ARL8B_MOUSE ADP-ribosylation factor-like protein 8B OS=Mus musculus GN=Arl8b PE=1 SV=1	1.05165e+06	940243	1.09543e+06	841390	852655	1.41493e+06	1.05214e+06	907366	997817	1.19632e+06	810532	908508	917613	1.02423e+06	888137	1.06629e+06	1.17794e+06	1.15938e+06	1.0999e+06	1.07144e+06
Q9D7A8	1	46.58	Armc1	1.12566	0.403706	0.867748	0.327196	0.885089	0.515983	Q9D7A8|ARMC1_MOUSE Armadillo repeat-containing protein 1 OS=Mus musculus GN=Armc1 PE=1 SV=1	146462	136230	148806	194819	126780	226095	113647	159463	173741	174788	147548	183750	105101	221905	192566	167882	143187	121104	153794	152375
Q9R0Q6	2	49.42	Arpc1a	1.13	0.16323	1.27109	0.0323134	1.09236	0.370452	Q9R0Q6|ARC1A_MOUSE Actin-related protein 2/3 complex subunit 1A OS=Mus musculus GN=Arpc1a PE=1 SV=1	104593	88995.9	115666	111982	88032.7	115429	131183	97165.7	104698	127002	119799	95641.4	82560.8	95444.3	72766.4	128207	99626.1	113593	119002	132170
Q9WV32	2	91.15	Arpc1b	1.22879	0.00880942	1.58424	0.012808	1.10624	0.157559	Q9WV32|ARC1B_MOUSE Actin-related protein 2/3 complex subunit 1B OS=Mus musculus GN=Arpc1b PE=1 SV=4	545125	516626	658535	645114	562666	792945	713799	711230	629580	750429	518840	461469	604819	529583	532145	921390	1.16977e+06	752365	678889	670857
Q9CVB6	9	356.09	Arpc2	1.12728	0.152152	1.3063	0.00113967	1.01315	0.817235	Q9CVB6|ARPC2_MOUSE Actin-related protein 2/3 complex subunit 2 OS=Mus musculus GN=Arpc2 PE=1 SV=3	3.11002e+06	3.28173e+06	3.37427e+06	2.99392e+06	2.70818e+06	2.79944e+06	3.43939e+06	3.29038e+06	3.86591e+06	4.04179e+06	2.6459e+06	2.93454e+06	3.31795e+06	3.40738e+06	2.96152e+06	3.95875e+06	4.00871e+06	4.10487e+06	3.53976e+06	4.33161e+06
Q9JM76	4	138.9	Arpc3	1.31682	2.97378e-05	1.28275	0.00609609	0.955056	0.394966	Q9JM76|ARPC3_MOUSE Actin-related protein 2/3 complex subunit 3 OS=Mus musculus GN=Arpc3 PE=1 SV=3	1.07831e+06	1.06186e+06	926718	1.08184e+06	972584	1.34253e+06	1.27374e+06	1.40752e+06	1.37387e+06	1.34619e+06	1.13693e+06	928360	1.06977e+06	1.16024e+06	1.06701e+06	1.38785e+06	1.31772e+06	1.15431e+06	1.59266e+06	1.42599e+06
P59999	6	187.59	Arpc4	1.4015	0.00490717	1.38239	9.97785e-05	1.0905	0.184791	P59999|ARPC4_MOUSE Actin-related protein 2/3 complex subunit 4 OS=Mus musculus GN=Arpc4 PE=1 SV=3	2.94349e+06	2.67094e+06	2.67142e+06	2.5993e+06	2.33289e+06	4.12288e+06	3.32733e+06	2.88457e+06	3.95598e+06	4.23432e+06	2.04554e+06	2.47551e+06	2.61342e+06	2.31262e+06	2.67397e+06	3.50847e+06	3.2776e+06	3.21252e+06	3.25372e+06	3.50372e+06
Q9CPW4	2	64.94	Arpc5	1.88428	0.0041332	2.00226	0.000294166	0.946332	0.674061	Q9CPW4|ARPC5_MOUSE Actin-related protein 2/3 complex subunit 5 OS=Mus musculus GN=Arpc5 PE=1 SV=3	124803	129818	164047	150965	116229	360944	196674	206168	266838	261735	132424	123852	136846	130914	200722	308166	342407	304855	230902	264822
Q9D898	1	25.88	Arpc5l	1.70157	0.231018	1.71614	0.0158477	0.901549	0.662766	Q9D898|ARP5L_MOUSE Actin-related protein 2/3 complex subunit 5-like protein OS=Mus musculus GN=Arpc5l PE=1 SV=1	19965.1	60864.1	31868	47637.9	39103.7	0	58365.1	80948.6	126701	73344.6	50531	58335.2	39177.4	51351.6	21822.7	56999.4	77702.1	81167.4	60872.9	102898
Q8R2G4	6	401.09	Art3	1.04756	0.650732	0.962751	0.734327	0.788872	0.124664	Q8R2G4|NAR3_MOUSE Ecto-ADP-ribosyltransferase 3 OS=Mus musculus GN=Art3 PE=1 SV=2	3.62404e+06	3.63771e+06	3.27639e+06	2.6453e+06	2.12651e+06	3.42905e+06	2.97552e+06	3.19498e+06	3.02891e+06	3.4096e+06	3.33469e+06	2.9533e+06	5.13515e+06	3.97114e+06	4.01314e+06	3.08014e+06	4.12692e+06	3.73411e+06	3.81053e+06	3.9328e+06
C0HK79	1	13.73	Arxes1	0.886297	0.324118	1.32115	0.0268697	1.18933	0.24212	C0HK79|ARXS1_MOUSE Adipocyte-related X-chromosome expressed sequence 1 OS=Mus musculus GN=Arxes1 PE=1 SV=1	414851	506489	413765	425564	265270	410002	333889	322816	322996	405881	282127	318871	404026	391063	307345	345913	474961	547108	433641	448861
Q91WU5	7	338.87	As3mt	1.06585	0.716522	1.02568	0.725507	0.925013	0.420409	Q91WU5|AS3MT_MOUSE Arsenite methyltransferase OS=Mus musculus GN=As3mt PE=1 SV=2	1.14716e+06	1.13499e+06	1.02275e+06	1.14888e+06	1.69636e+06	690691	1.23158e+06	1.4218e+06	1.78866e+06	1.42238e+06	1.12696e+06	1.50978e+06	1.28344e+06	1.2381e+06	1.49042e+06	1.43844e+06	1.19783e+06	1.53671e+06	1.31621e+06	1.33024e+06
Q9WV54	2	46.43	Asah1	1.16734	0.528243	1.35457	0.0430889	1.00682	0.946908	Q9WV54|ASAH1_MOUSE Acid ceramidase OS=Mus musculus GN=Asah1 PE=1 SV=1	150443	309964	141070	129844	212693	99334.9	256876	306681	223122	215977	109104	167415	222177	222725	216196	240362	232891	239734	320241	236839
O54984	2	93.67	Asna1	1.09635	0.428817	1.20019	0.0105615	1.0814	0.393528	O54984|ASNA_MOUSE ATPase Asna1 OS=Mus musculus GN=Asna1 PE=1 SV=2	348686	317697	369739	316110	448318	274905	372202	415942	444714	466278	374491	375526	289260	324723	301024	427016	385554	377948	410302	397529
Q8BSY0	3	150.69	Asph	0.985923	0.947736	1.43736	0.00693545	1.20053	0.313292	Q8BSY0|ASPH_MOUSE Aspartyl/asparaginyl beta-hydroxylase OS=Mus musculus GN=Asph PE=1 SV=1	2.84897e+06	4.76004e+06	2.38931e+06	2.40852e+06	2.91354e+06	1.40614e+06	3.79232e+06	2.83627e+06	3.01605e+06	4.05393e+06	2.01374e+06	2.27438e+06	3.23311e+06	2.39291e+06	2.84718e+06	3.10063e+06	3.74906e+06	4.39084e+06	3.77067e+06	3.33142e+06
Q99MQ4	6	254.88	Aspn	2.19706	0.000214575	2.82131	0.000164039	1.06317	0.676875	Q99MQ4|ASPN_MOUSE Asporin OS=Mus musculus GN=Aspn PE=1 SV=1	1.39452e+06	1.38362e+06	2.11808e+06	1.53268e+06	1.18789e+06	4.27288e+06	2.92778e+06	3.09661e+06	3.16912e+06	3.26818e+06	1.25084e+06	1.4021e+06	1.51857e+06	1.25586e+06	1.73688e+06	4.44494e+06	4.86396e+06	4.33397e+06	3.94172e+06	2.62799e+06
Q8C0M9	5	243.88	Asrgl1	1.23267	0.298932	0.914627	0.263787	0.844986	0.107568	Q8C0M9|ASGL1_MOUSE Isoaspartyl peptidase/L-asparaginase OS=Mus musculus GN=Asrgl1 PE=1 SV=1	1.32912e+06	1.24071e+06	1.41925e+06	1.27022e+06	928266	2.39833e+06	1.06538e+06	1.04615e+06	1.56838e+06	1.54896e+06	1.43615e+06	1.58792e+06	1.16162e+06	1.50776e+06	1.62924e+06	1.14985e+06	1.36576e+06	1.30438e+06	1.3337e+06	1.54383e+06
Q9D5T0	5	217.07	Atad1	1.05526	0.639319	0.929164	0.284296	0.981596	0.769918	Q9D5T0|ATAD1_MOUSE ATPase family AAA domain-containing protein 1 OS=Mus musculus GN=Atad1 PE=1 SV=1	2.97392e+06	3.10196e+06	2.20195e+06	2.27328e+06	2.79703e+06	2.41457e+06	3.62468e+06	2.45131e+06	2.47e+06	3.12514e+06	2.39412e+06	2.71336e+06	2.60042e+06	3.08821e+06	2.80231e+06	2.39099e+06	2.24121e+06	2.36608e+06	2.86737e+06	2.76952e+06
Q925I1	9	422.01	Atad3	1.17027	0.299124	0.833772	0.00172795	0.840676	0.0382324	Q925I1|ATAD3_MOUSE ATPase family AAA domain-containing protein 3 OS=Mus musculus GN=Atad3 PE=1 SV=1	2.50505e+06	3.13057e+06	2.61235e+06	3.09212e+06	3.60381e+06	5.0932e+06	3.5016e+06	2.945e+06	2.88063e+06	3.06791e+06	3.48399e+06	3.70565e+06	3.9011e+06	3.29459e+06	3.39073e+06	2.92325e+06	3.02881e+06	2.72861e+06	3.10346e+06	3.03704e+06
Q9CWJ9	7	334.3	Atic	1.23721	0.077104	1.12809	0.190882	1.03881	0.60306	Q9CWJ9|PUR9_MOUSE Bifunctional purine biosynthesis protein PURH OS=Mus musculus GN=Atic PE=1 SV=2	2.90618e+06	2.32493e+06	3.00153e+06	2.86393e+06	2.73212e+06	2.92502e+06	3.9096e+06	2.48393e+06	3.885e+06	3.90541e+06	2.22632e+06	2.57629e+06	2.63592e+06	3.33158e+06	2.54189e+06	2.86014e+06	2.47084e+06	3.22898e+06	3.12339e+06	3.33383e+06
Q8VDN2;Q9WV27;Q9Z1W8	16	1808.77	Atp1a1	1.21713	0.489169	1.54279	0.071549	1.20188	0.488077	Q8VDN2|AT1A1_MOUSE Sodium/potassium-transporting ATPase subunit alpha-1 OS=Mus musculus GN=Atp1a1 PE=1 SV=1	1.84754e+07	3.11977e+07	1.51076e+07	1.17908e+07	1.19571e+07	2.71523e+07	2.98743e+07	1.83076e+07	7.93582e+06	2.4481e+07	5.45762e+06	1.48656e+07	2.09706e+07	1.08561e+07	2.15085e+07	1.44038e+07	2.23972e+07	2.32108e+07	2.87853e+07	2.48423e+07
Q6PIE5;Q64436	2	886.55	Atp1a2	0.852911	0.564412	0.907893	0.687449	1.01067	0.995607	Q6PIE5|AT1A2_MOUSE Sodium/potassium-transporting ATPase subunit alpha-2 OS=Mus musculus GN=Atp1a2 PE=1 SV=1	307493	377144	266531	136047	144935	109267	321196	264090	150271	206091	187632	194133	411228	142146	284005	142957	213539	224292	299371	226693
P14094	5	299.53	Atp1b1	1.07436	0.732648	1.29427	0.124087	1.15967	0.508516	P14094|AT1B1_MOUSE Sodium/potassium-transporting ATPase subunit beta-1 OS=Mus musculus GN=Atp1b1 PE=1 SV=1	1.10612e+07	1.96245e+07	8.98081e+06	1.00172e+07	9.2451e+06	1.60511e+07	1.50714e+07	1.08412e+07	7.95264e+06	1.33945e+07	6.70098e+06	8.69408e+06	1.18743e+07	1.04659e+07	1.30796e+07	8.21387e+06	1.39071e+07	1.48217e+07	1.58268e+07	1.29985e+07
O55143	32	4393.98	Atp2a2	1.25503	0.395075	1.31374	0.225907	1.21094	0.511149	O55143|AT2A2_MOUSE Sarcoplasmic/endoplasmic reticulum calcium ATPase 2 OS=Mus musculus GN=Atp2a2 PE=1 SV=2	2.364e+08	2.95456e+08	1.8264e+08	1.19022e+08	1.01676e+08	2.94124e+08	3.09608e+08	1.92935e+08	1.01707e+08	2.75319e+08	5.69325e+07	1.36289e+08	2.293e+08	1.32665e+08	2.17099e+08	1.36706e+08	1.99602e+08	2.02541e+08	2.55257e+08	2.20479e+08
Q03265	65	4987.56	Atp5a1	1.06018	0.182821	0.829134	0.000459634	0.864441	0.00273946	Q03265|ATPA_MOUSE ATP synthase subunit alpha, mitochondrial OS=Mus musculus GN=Atp5a1 PE=1 SV=1	3.82215e+09	4.18587e+09	4.3369e+09	4.23095e+09	3.97088e+09	4.71321e+09	4.67512e+09	4.0187e+09	4.21438e+09	4.16185e+09	4.74043e+09	4.44498e+09	5.12037e+09	4.90357e+09	4.55946e+09	3.92316e+09	4.06786e+09	4.1381e+09	3.87891e+09	3.69949e+09
P56480	69	6746.65	Atp5b	0.985339	0.796672	0.888445	0.00861282	0.902758	0.0142244	P56480|ATPB_MOUSE ATP synthase subunit beta, mitochondrial OS=Mus musculus GN=Atp5b PE=1 SV=2	7.46968e+09	8.5621e+09	8.0486e+09	7.96849e+09	7.41842e+09	9.1114e+09	7.73009e+09	7.73724e+09	7.56371e+09	6.74621e+09	9.00729e+09	8.61532e+09	9.18304e+09	8.18938e+09	8.72357e+09	7.82813e+09	7.88766e+09	8.5152e+09	7.33379e+09	7.27677e+09
Q91VR2	20	1164.96	Atp5c1	0.968288	0.482214	0.875082	0.0329996	0.922013	0.148459	Q91VR2|ATPG_MOUSE ATP synthase subunit gamma, mitochondrial OS=Mus musculus GN=Atp5c1 PE=1 SV=1	6.15305e+08	6.51858e+08	6.31977e+08	6.50935e+08	5.77696e+08	6.65874e+08	6.55367e+08	5.49062e+08	5.76525e+08	5.81754e+08	7.15213e+08	6.6674e+08	7.61457e+08	6.6236e+08	5.86559e+08	5.56893e+08	5.78716e+08	6.41759e+08	6.14712e+08	5.76486e+08
Q9D3D9	5	485	Atp5d	0.65535	0.0235445	0.920673	0.466499	1.26799	0.0726551	Q9D3D9|ATPD_MOUSE ATP synthase subunit delta, mitochondrial OS=Mus musculus GN=Atp5d PE=1 SV=1	1.05943e+08	1.37831e+08	1.34421e+08	1.55645e+08	8.82061e+07	1.17463e+08	8.02821e+07	7.88924e+07	6.64386e+07	6.45815e+07	9.09143e+07	1.08121e+08	9.75257e+07	9.60461e+07	9.79678e+07	5.75018e+07	9.31355e+07	9.18115e+07	1.1911e+08	9.00995e+07
P56382	3	70.73	Atp5e	0.798597	0.0138925	0.884133	0.0652916	1.01263	0.903735	P56382|ATP5E_MOUSE ATP synthase subunit epsilon, mitochondrial OS=Mus musculus GN=Atp5e PE=1 SV=2	2.92545e+07	3.53586e+07	3.41572e+07	3.75813e+07	2.74425e+07	2.79649e+07	2.79359e+07	2.54662e+07	2.31418e+07	2.62966e+07	3.56665e+07	3.18399e+07	3.20616e+07	3.42917e+07	2.78911e+07	2.44834e+07	3.01246e+07	2.91926e+07	3.11884e+07	2.80203e+07
Q9CQQ7	23	1235	Atp5f1	1.14914	0.0516609	0.730825	0.00835569	0.79783	0.0286799	Q9CQQ7|AT5F1_MOUSE ATP synthase F(0) complex subunit B1, mitochondrial OS=Mus musculus GN=Atp5f1 PE=1 SV=1	3.15409e+08	2.72266e+08	2.79492e+08	2.56208e+08	2.67412e+08	3.28723e+08	3.75147e+08	2.96158e+08	3.01394e+08	2.96785e+08	3.50029e+08	2.88902e+08	3.90887e+08	4.18338e+08	2.95057e+08	2.46127e+08	2.2757e+08	2.5559e+08	2.77433e+08	2.67264e+08
Q9DCX2	18	1320.69	Atp5h	0.776661	0.0247566	0.8207	0.0153037	0.95573	0.585777	Q9DCX2|ATP5H_MOUSE ATP synthase subunit d, mitochondrial OS=Mus musculus GN=Atp5h PE=1 SV=3	6.09182e+08	7.01682e+08	6.90237e+08	8.14689e+08	6.56222e+08	7.09777e+08	4.74251e+08	5.48819e+08	4.83473e+08	4.80258e+08	8.42322e+08	7.65168e+08	6.69988e+08	5.995e+08	7.5586e+08	5.99134e+08	5.85545e+08	5.8406e+08	6.20475e+08	5.92257e+08
Q06185	6	423.93	Atp5i	0.897074	0.165776	0.919413	0.186169	0.940602	0.380305	Q06185|ATP5I_MOUSE ATP synthase subunit e, mitochondrial OS=Mus musculus GN=Atp5i PE=1 SV=2	1.56028e+08	1.80574e+08	1.55094e+08	1.88176e+08	1.50393e+08	1.7388e+08	1.60491e+08	1.45878e+08	1.28662e+08	1.35897e+08	2.02047e+08	1.77542e+08	1.49863e+08	1.75134e+08	1.78109e+08	1.42796e+08	1.71729e+08	1.64691e+08	1.71788e+08	1.60558e+08
P97450	9	493.42	Atp5j	0.579357	0.0237785	0.893153	0.497569	1.19751	0.356421	P97450|ATP5J_MOUSE ATP synthase-coupling factor 6, mitochondrial OS=Mus musculus GN=Atp5j PE=1 SV=1	8.00836e+07	1.13788e+08	1.1895e+08	1.64672e+08	7.99319e+07	8.22103e+07	6.24537e+07	7.57465e+07	4.91498e+07	5.33881e+07	1.15134e+08	1.09921e+08	7.41361e+07	8.41223e+07	8.21764e+07	5.66636e+07	9.76498e+07	7.27201e+07	1.20051e+08	6.86683e+07
P56135	6	201.41	Atp5j2	0.96047	0.627452	0.86407	0.0137944	1.03743	0.411341	P56135|ATPK_MOUSE ATP synthase subunit f, mitochondrial OS=Mus musculus GN=Atp5j2 PE=1 SV=3	7.70315e+07	8.2932e+07	7.02931e+07	7.50657e+07	7.69596e+07	9.22469e+07	8.0599e+07	6.65125e+07	6.34788e+07	6.43331e+07	8.21154e+07	7.63729e+07	7.18535e+07	7.11031e+07	6.70435e+07	6.31301e+07	6.09133e+07	5.90155e+07	6.54898e+07	6.98512e+07
Q9CPQ8	5	270.9	Atp5l	1.04764	0.747794	0.896309	0.129606	1.06023	0.758634	Q9CPQ8|ATP5L_MOUSE ATP synthase subunit g, mitochondrial OS=Mus musculus GN=Atp5l PE=1 SV=1	6.37623e+07	1.21766e+08	7.96091e+07	7.46514e+07	7.50519e+07	8.05805e+07	1.08433e+08	9.02157e+07	8.53895e+07	6.99861e+07	7.90748e+07	7.6875e+07	8.94078e+07	8.04001e+07	6.55154e+07	6.53853e+07	7.78053e+07	6.53628e+07	6.55254e+07	7.66228e+07
Q9DB20	20	1674.02	Atp5o	1.05645	0.367404	0.901327	0.0271946	0.96633	0.39122	Q9DB20|ATPO_MOUSE ATP synthase subunit O, mitochondrial OS=Mus musculus GN=Atp5o PE=1 SV=1	4.05418e+08	4.28327e+08	4.42344e+08	4.20664e+08	4.20819e+08	4.97699e+08	5.0917e+08	3.86315e+08	4.07229e+08	4.36692e+08	4.82032e+08	3.96823e+08	4.52599e+08	4.39496e+08	4.20405e+08	3.75213e+08	3.94844e+08	4.0961e+08	4.112e+08	3.84262e+08
Q9CRA7	2	81.06	Atp5s	1.1194	0.421191	0.814621	0.126506	1.03665	0.654156	Q9CRA7|ATP5S_MOUSE ATP synthase subunit s, mitochondrial OS=Mus musculus GN=Atp5s PE=1 SV=1	420517	453580	459860	446223	352086	666789	510140	318001	448928	443011	309459	409794	411420	543917	382299	257532	321502	329673	371528	395350
P51863	1	19.53	Atp6v0d1	2.01883	0.0189609	1.16384	0.484042	0.844943	0.570765	P51863|VA0D1_MOUSE V-type proton ATPase subunit d 1 OS=Mus musculus GN=Atp6v0d1 PE=1 SV=2	53120.7	55289.5	51424	31212.8	32238.2	145244	73204.2	69966.6	67724.5	94635.5	34442.8	38822.9	37067.3	74663.3	79264.3	65521.1	44283.7	48544.1	75912.3	73296.6
P50516	3	123.12	Atp6v1a	2.61354	0.15363	1.36169	0.0104109	1.09047	0.403607	P50516|VATA_MOUSE V-type proton ATPase catalytic subunit A OS=Mus musculus GN=Atp6v1a PE=1 SV=2	608759	448551	568623	564989	449631	3.49992e+06	1.02438e+06	516261	768420	1.0922e+06	378016	600020	418486	509365	515593	728669	561255	596966	671705	738715
P62814	4	152.8	Atp6v1b2	1.20737	0.101356	1.26515	0.05314	1.12008	0.154494	P62814|VATB2_MOUSE V-type proton ATPase subunit B, brain isoform OS=Mus musculus GN=Atp6v1b2 PE=1 SV=1	484753	499076	662046	566084	512568	606608	624823	537125	844926	676040	420628	470177	494652	531506	515466	767173	713717	561575	482548	552388
P50518;Q9D593	2	43.45	Atp6v1e1	1.10672	0.575874	0.836026	0.132907	0.927053	0.459068	P50518|VATE1_MOUSE V-type proton ATPase subunit E 1 OS=Mus musculus GN=Atp6v1e1 PE=1 SV=2	2.50068e+06	1.4348e+06	1.91889e+06	1.76858e+06	1.49143e+06	1.08288e+06	2.18406e+06	1.78615e+06	2.65848e+06	2.37548e+06	2.22736e+06	1.98681e+06	2.02603e+06	2.02118e+06	1.5702e+06	1.3858e+06	1.38737e+06	1.37628e+06	2.01245e+06	2.05755e+06
Q9CR51	1	22.79	Atp6v1g1	0.66196	0.00719253	1.32495	0.134808	1.37527	0.0411787	Q9CR51|VATG1_MOUSE V-type proton ATPase subunit G 1 OS=Mus musculus GN=Atp6v1g1 PE=1 SV=3	180736	254135	222775	240513	188643	156855	86183.6	147961	163103	165317	145250	178459	115033	124604	226899	227937	289675	155880	193861	179682
P98195	1	15.73	Atp9b	1.11282	0.487157	1.43727	0.0242705	1.14887	0.432022	P98195|ATP9B_MOUSE Probable phospholipid-transporting ATPase IIB OS=Mus musculus GN=Atp9b PE=1 SV=4	479570	979074	578656	819091	677440	1.02111e+06	621051	759460	765107	765791	549357	711675	646845	527934	640104	1.21326e+06	928082	835269	705906	738408
Q811I0	3	147.85	Atpaf1	1.06426	0.617402	0.935608	0.608981	0.966611	0.951056	Q811I0|ATPF1_MOUSE ATP synthase mitochondrial F1 complex assembly factor 1 OS=Mus musculus GN=Atpaf1 PE=1 SV=1	1.67106e+06	1.59453e+06	1.44902e+06	1.86178e+06	1.9741e+06	2.57073e+06	1.55461e+06	1.65561e+06	1.71548e+06	1.60353e+06	2.00933e+06	2.11984e+06	1.45758e+06	1.11381e+06	2.14528e+06	1.82873e+06	1.51713e+06	1.542e+06	1.65999e+06	1.7284e+06
Q91YY4	4	188.01	Atpaf2	1.23545	0.0500264	0.641798	0.0154856	0.759391	0.0457251	Q91YY4|ATPF2_MOUSE ATP synthase mitochondrial F1 complex assembly factor 2 OS=Mus musculus GN=Atpaf2 PE=1 SV=1	812083	734690	697866	712389	740062	1.08688e+06	1.02009e+06	694191	796849	969561	819304	704374	1.11139e+06	1.26704e+06	966391	607152	428922	721792	720486	646235
O35143	2	79.47	Atpif1	0.68993	0.0675891	1.63156	0.000968516	1.34251	0.0907361	O35143|ATIF1_MOUSE ATPase inhibitor, mitochondrial OS=Mus musculus GN=Atpif1 PE=1 SV=2	6.95381e+06	9.78786e+06	1.05104e+07	1.48546e+07	8.61001e+06	8.35212e+06	4.63282e+06	8.23181e+06	6.45842e+06	7.31584e+06	9.18733e+06	8.04553e+06	7.23075e+06	6.22427e+06	7.08973e+06	1.16233e+07	1.49394e+07	1.32639e+07	1.14038e+07	1.04062e+07
Q9JLZ3	9	421.66	Auh	1.01629	0.814969	0.773011	5.62844e-06	0.870693	0.00094877	Q9JLZ3|AUHM_MOUSE Methylglutaconyl-CoA hydratase, mitochondrial OS=Mus musculus GN=Auh PE=1 SV=1	2.06268e+07	1.95872e+07	2.0619e+07	2.21964e+07	2.13827e+07	2.39006e+07	2.44519e+07	1.72939e+07	2.08489e+07	1.96172e+07	2.53421e+07	2.32589e+07	2.40119e+07	2.43638e+07	2.29416e+07	1.93966e+07	1.76121e+07	1.84811e+07	1.83767e+07	1.88316e+07
O35625	1	18.05	Axin1	0.714297	0.148766	0.959771	0.797449	0.853962	0.37122	O35625|AXIN1_MOUSE Axin-1 OS=Mus musculus GN=Axin1 PE=1 SV=3	321079	846135	564420	713062	830520	299151	456841	677096	378408	527981	902324	526929	700503	791444	914115	790370	975682	766962	738352	409660
Q64726	2	96.78	Azgp1	0.930445	0.833106	3.03069	0.00183734	1.64298	0.046704	Q64726|ZA2G_MOUSE Zinc-alpha-2-glycoprotein OS=Mus musculus GN=Azgp1 PE=1 SV=2	167681	174795	226000	250389	209301	6068.37	254759	196293	384486	115045	98659.8	139096	52147	101613	234277	433215	358679	528945	308594	267154
P01887	1	36.04	B2m	0.781967	0.354784	1.7082	0.0203406	1.36567	0.302746	P01887|B2MG_MOUSE Beta-2-microglobulin OS=Mus musculus GN=B2m PE=1 SV=2	302189	301417	649544	679199	279838	417203	211429	413643	354401	333181	389595	273870	189786	222828	543772	522386	473125	608125	706367	457029
Q60739	1	34.47	Bag1	1.03137	0.913561	1.46683	0.0028939	1.24417	0.387595	Q60739|BAG1_MOUSE BAG family molecular chaperone regulator 1 OS=Mus musculus GN=Bag1 PE=1 SV=3	58518.9	99905.9	54585.5	79817.4	137921	139420	29020.4	111846	92247.2	71727.8	57936.6	67504.2	73778	70585.4	76408.6	102391	117649	107415	75812.1	104569
Q91YN9	4	146.75	Bag2	1.07538	0.535047	1.20001	0.139792	0.924302	0.686886	Q91YN9|BAG2_MOUSE BAG family molecular chaperone regulator 2 OS=Mus musculus GN=Bag2 PE=1 SV=1	1.16311e+06	1.30519e+06	1.43454e+06	1.07701e+06	1.3045e+06	1.73995e+06	943333	1.23135e+06	1.48578e+06	1.35762e+06	1.57801e+06	1.35477e+06	1.15239e+06	902511	1.81134e+06	1.80291e+06	1.64636e+06	1.59022e+06	1.50848e+06	1.6109e+06
Q9JLV1	19	1226.69	Bag3	0.747187	0.00677343	0.973141	0.652789	1.06669	0.476386	Q9JLV1|BAG3_MOUSE BAG family molecular chaperone regulator 3 OS=Mus musculus GN=Bag3 PE=1 SV=2	4.50856e+07	6.13162e+07	4.96239e+07	6.27448e+07	5.93767e+07	4.39546e+07	3.64433e+07	4.63731e+07	4.01691e+07	4.08879e+07	5.94641e+07	5.6886e+07	4.54852e+07	4.97994e+07	4.91226e+07	5.49706e+07	4.67582e+07	4.86026e+07	5.32109e+07	5.02114e+07
Q9Z1R2	2	53.07	Bag6	1.86413	0.227845	1.57681	0.111051	0.9751	0.926661	Q9Z1R2|BAG6_MOUSE Large proline-rich protein BAG6 OS=Mus musculus GN=Bag6 PE=1 SV=1	122434	92440.8	171546	80379	30629.9	415664	96039.2	65387.2	184081	166104	58709	82013.6	68455.2	77504.2	223449	176703	171996	179658	114880	161145
Q9R069	6	300.69	Bcam	1.10288	0.271928	1.20569	0.025617	1.00353	0.964848	Q9R069|BCAM_MOUSE Basal cell adhesion molecule OS=Mus musculus GN=Bcam PE=1 SV=1	3.71306e+06	3.80872e+06	3.32589e+06	2.81946e+06	2.9529e+06	4.44411e+06	3.24728e+06	3.66001e+06	3.31864e+06	3.6599e+06	3.03948e+06	3.19976e+06	3.35357e+06	2.88118e+06	4.0876e+06	3.77326e+06	4.42454e+06	4.01486e+06	3.65072e+06	4.10471e+06
O35855	14	838.61	Bcat2	0.981464	0.810788	0.780843	0.000273655	0.899887	0.012104	O35855|BCAT2_MOUSE Branched-chain-amino-acid aminotransferase, mitochondrial OS=Mus musculus GN=Bcat2 PE=1 SV=2	5.18758e+07	4.66315e+07	4.83876e+07	4.76869e+07	4.89239e+07	6.0026e+07	4.64255e+07	3.87723e+07	4.40474e+07	4.97207e+07	5.32792e+07	5.11286e+07	5.83061e+07	5.67906e+07	5.10914e+07	4.36435e+07	4.1251e+07	3.88004e+07	4.14285e+07	4.61694e+07
P50136	14	948.09	Bckdha	0.837774	0.000941727	0.791527	0.000936592	0.98146	0.714472	P50136|ODBA_MOUSE 2-oxoisovalerate dehydrogenase subunit alpha, mitochondrial OS=Mus musculus GN=Bckdha PE=1 SV=1	1.81215e+07	2.09282e+07	2.00153e+07	2.05733e+07	2.14309e+07	1.78615e+07	1.64014e+07	1.61963e+07	1.70174e+07	1.71965e+07	2.27871e+07	2.06721e+07	1.96618e+07	2.14553e+07	1.84021e+07	1.62989e+07	1.52832e+07	1.56185e+07	1.72497e+07	1.70597e+07
Q6P3A8	10	628.88	Bckdhb	0.912824	0.0506485	0.741183	0.00124233	0.957428	0.437585	Q6P3A8|ODBB_MOUSE 2-oxoisovalerate dehydrogenase subunit beta, mitochondrial OS=Mus musculus GN=Bckdhb PE=1 SV=2	1.32852e+07	1.39828e+07	1.22674e+07	1.32872e+07	1.43007e+07	1.27248e+07	1.28646e+07	1.104e+07	1.17492e+07	1.28932e+07	1.39674e+07	1.29844e+07	1.39601e+07	1.63362e+07	1.28598e+07	1.0706e+07	9.59854e+06	9.74772e+06	1.00763e+07	1.18342e+07
O55028	5	250.51	Bckdk	1.10753	0.276116	0.764357	0.00589584	0.903238	0.0764599	O55028|BCKD_MOUSE [3-methyl-2-oxobutanoate dehydrogenase [lipoamide]] kinase, mitochondrial OS=Mus musculus GN=Bckdk PE=1 SV=1	1.67166e+06	1.85229e+06	1.54756e+06	1.75425e+06	1.80207e+06	2.2747e+06	2.1839e+06	1.43445e+06	1.82457e+06	1.83792e+06	1.74798e+06	2.08581e+06	2.02704e+06	1.95816e+06	1.7331e+06	1.37934e+06	1.11908e+06	1.56034e+06	1.57597e+06	1.66648e+06
P59017	5	328.06	Bcl2l13	1.05336	0.432868	0.961707	0.48804	1.09674	0.165533	P59017|B2L13_MOUSE Bcl-2-like protein 13 OS=Mus musculus GN=Bcl2l13 PE=1 SV=2	6.50047e+06	7.66658e+06	5.89806e+06	6.46336e+06	5.52402e+06	7.18006e+06	7.16239e+06	6.47095e+06	6.79914e+06	6.1503e+06	6.04752e+06	5.66405e+06	5.72746e+06	5.82289e+06	5.96336e+06	6.57856e+06	5.10189e+06	5.89934e+06	4.89273e+06	5.63366e+06
Q9CZP5	4	253.56	Bcs1l	1.41457	0.157499	0.635463	0.0626772	0.731368	0.173672	Q9CZP5|BCS1_MOUSE Mitochondrial chaperone BCS1 OS=Mus musculus GN=Bcs1l PE=1 SV=1	325430	571718	511962	411334	358603	699368	989802	445482	405794	541957	305545	601815	606496	774730	690825	310476	297183	260200	425139	600308
Q80XN0	17	912.05	Bdh1	1.23639	0.0146947	0.858029	0.242039	0.98799	0.974333	Q80XN0|BDH_MOUSE D-beta-hydroxybutyrate dehydrogenase, mitochondrial OS=Mus musculus GN=Bdh1 PE=1 SV=2	6.17433e+07	5.455e+07	5.15964e+07	6.34926e+07	6.2881e+07	6.92459e+07	7.59117e+07	6.08378e+07	8.36941e+07	7.41348e+07	6.03253e+07	4.14641e+07	6.10227e+07	7.718e+07	5.78483e+07	6.21306e+07	4.40328e+07	4.26829e+07	5.33937e+07	5.33157e+07
P28653	13	678.8	Bgn	1.6871	0.000116252	1.95967	0.00134963	0.943888	0.614237	P28653|PGS1_MOUSE Biglycan OS=Mus musculus GN=Bgn PE=1 SV=1	1.16751e+07	1.1911e+07	1.31907e+07	1.34303e+07	1.04312e+07	2.28074e+07	1.84736e+07	2.15888e+07	2.2041e+07	1.7392e+07	1.15447e+07	1.23658e+07	1.30419e+07	1.04356e+07	1.6855e+07	2.84166e+07	3.10061e+07	2.64106e+07	2.21515e+07	1.79107e+07
Q8BGW3	1	23.02	Bhlhe23	1.25811	0.0355745	0.825457	0.0442338	0.823466	0.0518076	Q8BGW3|BHE23_MOUSE Class E basic helix-loop-helix protein 23 OS=Mus musculus GN=Bhlhe23 PE=2 SV=1	5.56526e+06	6.42025e+06	6.30462e+06	7.24125e+06	6.60911e+06	9.42658e+06	7.02643e+06	9.52131e+06	7.84099e+06	6.62083e+06	8.00261e+06	7.22198e+06	7.99785e+06	6.23084e+06	9.57746e+06	6.13755e+06	6.88277e+06	6.31931e+06	6.74931e+06	6.12926e+06
Q921C5	1	16.74	Bicd2	1.61949	0.414047	0.620775	0.686025	0.422643	0.455608	Q921C5|BICD2_MOUSE Protein bicaudal D homolog 2 OS=Mus musculus GN=Bicd2 PE=1 SV=1	34593.7	33789.5	21936.8	53217.9	55142.5	170266	49915.9	50391.4	4304.78	46883	6628.42	10694.1	23159.6	3975.1	425633	83678.7	119215	34882.1	21162.4	32882.3
Q8VD62	1	20.88	Bles03	1.02166	0.796332	1.372	0.00107883	1.24439	0.0182649	Q8VD62|CK068_MOUSE UPF0696 protein C11orf68 homolog OS=Mus musculus GN=Bles03 PE=1 SV=1	86591.2	110209	100013	113005	90823.6	86516	95153.2	95632.4	117799	116383	65627.9	79737.3	84931.2	83397.1	88625.1	119940	114734	109161	114448	93699.9
P16277	1	27.6	Blk	2.0682	0.000451995	2.22696	0.000945942	1.07828	0.627085	P16277|BLK_MOUSE Tyrosine-protein kinase Blk OS=Mus musculus GN=Blk PE=1 SV=4	22267.1	36981.8	30595.1	30265.3	21202.8	61966.4	61093.2	56665.5	42910.9	69625.6	19711.7	32721.4	26806.9	21098.5	30714.8	66328	76173.4	53413.4	43123.3	52812.7
Q8R016	1	45.59	Blmh	1.48035	0.11364	1.64396	0.0663074	1.18298	0.642627	Q8R016|BLMH_MOUSE Bleomycin hydrolase OS=Mus musculus GN=Blmh PE=1 SV=1	91168	48099.7	25818.4	56899.8	86597.3	76152.9	75920.3	69121.5	107186	128430	56791	53584.4	64093.9	66595.4	19787.8	115771	65253.4	94411	44945	108451
Q9CY64	5	244.41	Blvra	1.05639	0.583353	1.22484	0.0113599	1.10857	0.259166	Q9CY64|BIEA_MOUSE Biliverdin reductase A OS=Mus musculus GN=Blvra PE=1 SV=1	2.08071e+06	2.10561e+06	2.0933e+06	2.26156e+06	1.58588e+06	2.42738e+06	1.96913e+06	1.59773e+06	2.21028e+06	2.49365e+06	1.5512e+06	1.68566e+06	2.16559e+06	1.96441e+06	1.76843e+06	2.08184e+06	2.12361e+06	2.44399e+06	2.25072e+06	2.2891e+06
Q923D2	9	478.45	Blvrb	0.822173	0.0615041	1.20675	0.106188	1.16062	0.0888779	Q923D2|BLVRB_MOUSE Flavin reductase (NADPH) OS=Mus musculus GN=Blvrb PE=1 SV=3	1.16925e+07	1.28672e+07	1.43444e+07	1.30095e+07	9.99287e+06	9.5104e+06	1.11995e+07	7.77948e+06	1.17119e+07	1.06966e+07	1.02588e+07	1.07607e+07	9.20272e+06	1.11635e+07	1.19535e+07	1.03818e+07	1.27828e+07	1.69861e+07	1.14621e+07	1.27541e+07
Q9D8S9	2	59.69	Bola1	0.443441	0.0323	1.34705	0.083393	1.71778	0.0401082	Q9D8S9|BOLA1_MOUSE BolA-like protein 1 OS=Mus musculus GN=Bola1 PE=1 SV=1	102518	191462	132402	242110	98154	135942	31427.3	65308.9	52798.1	54486.3	98237.3	111350	71527.4	65983.2	99203.4	72125.8	139827	118057	145848	125331
Q8CEI1	2	125.36	Bola3	0.254844	0.018562	1.03807	0.928706	1.72659	0.14855	Q8CEI1|BOLA3_MOUSE BolA-like protein 3 OS=Mus musculus GN=Bola3 PE=1 SV=1	256782	432523	401644	775019	202621	218439	72741.7	119515	43884.5	72587.6	428512	393011	107095	86994.3	182466	113313	208464	138928	489383	293607
P15327	3	83.48	Bpgm	0.983089	0.90912	1.29556	0.21359	1.06536	0.651153	P15327|PMGE_MOUSE Bisphosphoglycerate mutase OS=Mus musculus GN=Bpgm PE=1 SV=2	924199	1.00802e+06	1.12875e+06	951068	636353	1.25851e+06	888159	606818	979160	837137	897341	799770	720152	825182	1.12076e+06	816396	979453	1.80187e+06	882185	1.17287e+06
Q8R164	10	422.53	Bphl	0.915082	0.0663366	0.842912	0.0163856	0.983867	0.83424	Q8R164|BPHL_MOUSE Valacyclovir hydrolase OS=Mus musculus GN=Bphl PE=1 SV=1	7.98869e+06	7.97955e+06	8.31697e+06	8.12494e+06	7.39238e+06	6.48284e+06	7.93525e+06	7.08417e+06	7.89516e+06	7.02517e+06	7.98753e+06	7.89814e+06	9.05419e+06	8.76685e+06	6.74847e+06	6.5962e+06	6.55773e+06	7.01246e+06	6.75187e+06	7.18187e+06
Q9Z0S1	4	158.12	Bpnt1	0.974598	0.437002	0.958489	0.459211	0.965648	0.56517	Q9Z0S1|BPNT1_MOUSE 3'(2'),5'-bisphosphate nucleotidase 1 OS=Mus musculus GN=Bpnt1 PE=1 SV=2	1.27133e+06	1.21169e+06	1.32021e+06	1.34842e+06	1.25568e+06	1.34011e+06	1.20174e+06	1.23453e+06	1.16754e+06	1.30064e+06	1.45355e+06	1.28177e+06	1.48753e+06	1.2682e+06	1.14421e+06	1.24915e+06	1.39444e+06	1.21623e+06	1.2569e+06	1.24311e+06
P46737	1	19.81	Brcc3	0.718257	0.107753	1.44358	0.147403	1.5199	0.0444682	P46737|BRCC3_MOUSE Lys-63-specific deubiquitinase BRCC36 OS=Mus musculus GN=Brcc3 PE=1 SV=1	65584.6	94637.7	72019.1	100339	51977.4	40151.5	37373.1	79370.9	54241.3	65074.5	66804.9	65966.6	41817.5	43740.1	34686	99797.1	30730.9	85004	60979.3	88736.1
P18572	8	488.59	Bsg	1.15778	0.131157	1.1232	0.104099	0.990836	0.862741	P18572|BASI_MOUSE Basigin OS=Mus musculus GN=Bsg PE=1 SV=2	2.16652e+07	1.87012e+07	1.72769e+07	1.73319e+07	1.88483e+07	1.88841e+07	2.59775e+07	1.7835e+07	2.13926e+07	2.45377e+07	1.69922e+07	1.78862e+07	2.0479e+07	1.88011e+07	2.05327e+07	2.02746e+07	1.78948e+07	2.12624e+07	2.29315e+07	2.39942e+07
E9Q173	1	13.95	Btbd16	0.989001	0.847457	1.06092	0.641094	0.940611	0.73754	E9Q173|BTBDG_MOUSE BTB/POZ domain-containing protein 16 OS=Mus musculus GN=Btbd16 PE=4 SV=1	1.21598e+06	1.45523e+06	1.25147e+06	1.31111e+06	1.42548e+06	1.23842e+06	1.2156e+06	1.43037e+06	1.4789e+06	1.22273e+06	1.9305e+06	1.48549e+06	1.46356e+06	1.18315e+06	1.01703e+06	1.61843e+06	1.59903e+06	1.70128e+06	1.32401e+06	1.26825e+06
Q64152	6	248.03	Btf3	0.828905	0.139124	1.62711	0.0072685	1.47855	0.00339527	Q64152|BTF3_MOUSE Transcription factor BTF3 OS=Mus musculus GN=Btf3 PE=1 SV=3	2.69284e+06	3.87401e+06	3.1823e+06	4.24385e+06	3.33863e+06	2.74071e+06	2.1722e+06	2.96298e+06	3.6623e+06	2.82808e+06	2.31219e+06	2.58213e+06	2.35833e+06	1.94765e+06	2.52173e+06	4.18174e+06	4.8037e+06	4.33093e+06	2.8151e+06	2.9416e+06
Q9CQH7	3	159.37	Btf3l4	1.09486	0.4157	1.5705	0.0200315	1.01068	0.727867	Q9CQH7|BT3L4_MOUSE Transcription factor BTF3 homolog 4 OS=Mus musculus GN=Btf3l4 PE=1 SV=1	1.80065e+06	2.19944e+06	1.76322e+06	1.75186e+06	1.77927e+06	1.99885e+06	1.33468e+06	2.17943e+06	2.4e+06	2.26318e+06	2.42983e+06	2.22584e+06	1.64297e+06	821773	2.07585e+06	3.20427e+06	3.27836e+06	2.85184e+06	2.04327e+06	3.06495e+06
Q9ES83	1	25.81	Bves	1.2332	0.583135	1.7831	0.0353102	1.2179	0.634936	Q9ES83|POPD1_MOUSE Blood vessel epicardial substance OS=Mus musculus GN=Bves PE=1 SV=1	45164.6	92417	19066.1	38697.3	27998.6	31493.1	88145.8	56764.7	20592.1	78431.1	8931.04	33000.6	46145.8	46374.1	48932.3	40625.5	74278	90342.5	68173.7	53571.8
Q2L4X1;Q9CQC6	6	131.54	Bzw2	1.0767	0.365827	1.01779	0.854453	0.95469	0.63618	Q2L4X1|BZW2_MUSMM Basic leucine zipper and W2 domain-containing protein 2 OS=Mus musculus molossinus GN=Bzw2 PE=2 SV=1	1.35307e+06	1.0726e+06	1.04187e+06	1.05888e+06	919721	1.14608e+06	1.1485e+06	1.01477e+06	1.30903e+06	1.24547e+06	1.25206e+06	991711	1.21435e+06	1.31362e+06	932874	913449	1.35696e+06	1.20883e+06	1.24878e+06	1.07811e+06
O35658	9	528.86	C1qbp	0.835384	0.155145	1.12589	0.0605852	1.232	0.0624083	O35658|C1QBP_MOUSE Complement component 1 Q subcomponent-binding protein, mitochondrial OS=Mus musculus GN=C1qbp PE=1 SV=1	5.04126e+07	7.67553e+07	4.9849e+07	6.10434e+07	5.59216e+07	6.1126e+07	3.98884e+07	4.87002e+07	5.25171e+07	4.33559e+07	5.17155e+07	5.37771e+07	4.74663e+07	4.14851e+07	4.41784e+07	5.34027e+07	5.32199e+07	5.8367e+07	4.88088e+07	5.48649e+07
P01027	46	2413.24	C3	1.04626	0.773615	1.75015	0.00272339	1.48367	0.0627579	P01027|CO3_MOUSE Complement C3 OS=Mus musculus GN=C3 PE=1 SV=3	4.85858e+07	4.57118e+07	5.35983e+07	2.61938e+07	2.60235e+07	4.05824e+07	4.53251e+07	3.61539e+07	4.83595e+07	3.89488e+07	2.43219e+07	2.60143e+07	2.75426e+07	3.09694e+07	2.60292e+07	3.78372e+07	5.23457e+07	6.22615e+07	4.53266e+07	3.82843e+07
P01029	1	95.86	C4b	1.52482	0.0349741	2.4219	3.93861e-05	1.45136	0.029842	P01029|CO4B_MOUSE Complement C4-B OS=Mus musculus GN=C4b PE=1 SV=3	601840	378456	563516	403638	343092	879680	691230	441917	848145	631695	254007	284686	355541	293934	390035	689668	782454	950024	690924	709178
P08607	2	63.03	C4bpa	1.8779	0.0352301	3.12249	0.00081172	1.20517	0.341273	P08607|C4BPA_MOUSE C4b-binding protein OS=Mus musculus GN=C4bpa PE=1 SV=3	152594	149717	315493	173629	179376	452905	266161	476434	448930	178648	187090	176663	129836	141520	170427	425332	514665	749798	398710	426770
P06684	4	142	C5	2.36732	0.0022149	2.34263	4.16815e-05	1.24157	0.389435	P06684|CO5_MOUSE Complement C5 OS=Mus musculus GN=C5 PE=1 SV=2	276797	190964	253195	151477	106763	634762	377054	364360	529087	412802	135376	153319	166642	166007	167329	331223	348160	429346	307881	430963
Q8K182	2	62.29	C8a	1.36269	0.10089	2.5482	0.000704191	1.33135	0.171476	Q8K182|CO8A_MOUSE Complement component C8 alpha chain OS=Mus musculus GN=C8a PE=1 SV=1	264673	249010	240150	287876	155679	285905	305545	310928	484173	245114	127056	96769.8	260136	279187	136230	386249	540990	539600	456611	368350
Q8VCG4	1	29.13	C8g	0.959705	0.740017	1.02052	0.874425	0.884799	0.483664	Q8VCG4|CO8G_MOUSE Complement component C8 gamma chain OS=Mus musculus GN=C8g PE=1 SV=1	994360	773289	824500	898098	920526	820373	707048	621788	1.17899e+06	904844	994896	1.07031e+06	610876	1.00548e+06	1.3035e+06	914793	1.02614e+06	905395	1.22427e+06	1.01676e+06
P06683	3	135.71	C9	1.10726	0.298775	1.24493	0.232671	1.09016	0.415218	P06683|CO9_MOUSE Complement component C9 OS=Mus musculus GN=C9 PE=1 SV=2	437526	520818	603125	615352	546628	510266	568479	561755	754771	620297	527601	386318	629679	551997	402623	774289	610127	827722	524572	373394
P13634	10	435.57	Ca1	0.974736	0.793976	1.32637	0.135124	1.03657	0.664841	P13634|CAH1_MOUSE Carbonic anhydrase 1 OS=Mus musculus GN=Ca1 PE=1 SV=4	1.34141e+07	1.48151e+07	1.67153e+07	1.45586e+07	1.21562e+07	1.62248e+07	1.38719e+07	1.0259e+07	1.62208e+07	1.32723e+07	1.28154e+07	1.39909e+07	1.07546e+07	1.3756e+07	1.78143e+07	1.36264e+07	1.99531e+07	2.70482e+07	1.40064e+07	1.70595e+07
Q8BHG2	1	48.01	CA123_MOUSE	0.796647	0.21159	1.06629	0.698039	0.940403	0.854592	Q8BHG2|CA123_MOUSE UPF0587 protein C1orf123 homolog OS=Mus musculus PE=1 SV=1	514760	481184	620421	474011	812545	630172	314065	341052	505759	521556	659356	628393	392319	456203	950618	765086	671471	592710	624184	638056
P00920	18	816.08	Ca2	0.985629	0.883559	1.31209	0.0643332	1.09997	0.111209	P00920|CAH2_MOUSE Carbonic anhydrase 2 OS=Mus musculus GN=Ca2 PE=1 SV=4	7.90261e+07	8.11468e+07	9.24978e+07	8.75745e+07	7.30055e+07	7.8801e+07	8.33114e+07	5.78557e+07	1.01999e+08	8.53449e+07	7.23638e+07	7.0623e+07	7.13626e+07	7.71311e+07	8.42111e+07	7.32813e+07	1.1146e+08	1.31984e+08	8.0302e+07	9.59124e+07
P16015	10	438.02	Ca3	0.797129	0.319011	1.60163	0.14018	2.32515	0.00225599	P16015|CAH3_MOUSE Carbonic anhydrase 3 OS=Mus musculus GN=Ca3 PE=1 SV=3	1.66926e+07	1.63781e+07	3.1342e+07	1.74373e+07	1.36872e+07	1.37161e+07	1.60982e+07	2.20177e+07	1.09156e+07	1.34078e+07	5.1276e+06	1.02277e+07	8.83073e+06	9.59127e+06	7.31122e+06	1.12905e+07	2.36086e+07	7.13331e+06	9.29594e+06	1.44802e+07
Q06138	4	127.41	Cab39	1.10725	0.360623	1.05389	0.748589	1.05992	0.615096	Q06138|CAB39_MOUSE Calcium-binding protein 39 OS=Mus musculus GN=Cab39 PE=1 SV=2	480856	551491	396245	434629	348488	528043	487827	357907	542959	532172	409396	288277	410071	601224	377709	464387	340095	571538	483212	339906
Q6PDJ1	1	16.79	Cachd1	0.775264	0.135762	0.861845	0.496418	1.11739	0.59112	Q6PDJ1|CAHD1_MOUSE VWFA and cache domain-containing protein 1 OS=Mus musculus GN=Cachd1 PE=2 SV=1	2.8168e+06	3.03012e+06	1.63351e+06	3.64722e+06	3.20486e+06	2.95219e+06	2.13437e+06	1.98664e+06	2.19907e+06	1.83923e+06	3.11178e+06	2.39495e+06	2.90537e+06	2.73041e+06	1.68429e+06	2.1058e+06	1.89865e+06	1.1973e+06	2.04839e+06	3.80458e+06
O08532	2	101.6	Cacna2d1	0.998103	0.992606	1.07526	0.752864	1.12842	0.540727	O08532|CA2D1_MOUSE Voltage-dependent calcium channel subunit alpha-2/delta-1 OS=Mus musculus GN=Cacna2d1 PE=1 SV=1	368997	509504	305872	337939	224064	475697	401406	208605	248184	409171	194220	353260	302402	259761	437989	164663	264812	388558	511559	334522
Q9CXW3	2	50.73	Cacybp	0.944921	0.669325	1.52958	0.0134057	1.11688	0.233442	Q9CXW3|CYBP_MOUSE Calcyclin-binding protein OS=Mus musculus GN=Cacybp PE=1 SV=1	169875	197460	212039	256014	196614	188628	127135	258064	215921	185411	222420	180011	178458	173316	169799	343466	291241	348693	209524	220416
P62204;Q9D6P8	5	395.92	Calm1	0.835269	0.0452086	1.03768	0.618271	1.12976	0.0369754	P62204|CALM_MOUSE Calmodulin OS=Mus musculus GN=Calm1 PE=1 SV=2	3.33597e+07	3.44645e+07	3.34741e+07	3.27741e+07	2.75623e+07	3.12339e+07	2.25205e+07	3.1747e+07	2.52311e+07	2.42758e+07	3.11193e+07	2.95093e+07	2.66142e+07	2.77508e+07	2.8077e+07	2.5603e+07	3.57358e+07	3.19913e+07	2.94139e+07	2.57168e+07
P14211	17	872.95	Calr	1.05	0.580126	1.43252	0.00212118	1.16784	0.081286	P14211|CALR_MOUSE Calreticulin OS=Mus musculus GN=Calr PE=1 SV=1	4.65248e+07	5.28726e+07	5.40913e+07	5.29382e+07	4.47489e+07	6.55278e+07	4.1024e+07	5.43137e+07	5.13425e+07	5.15272e+07	4.22208e+07	4.33902e+07	4.09925e+07	3.44721e+07	5.40023e+07	7.05729e+07	6.34829e+07	6.22627e+07	5.54547e+07	5.63298e+07
O35887	9	429.35	Calu	1.13657	0.257778	1.53998	0.00231201	1.28838	0.0495856	O35887|CALU_MOUSE Calumenin OS=Mus musculus GN=Calu PE=1 SV=1	7.00749e+06	7.37021e+06	8.88798e+06	7.86753e+06	5.86431e+06	9.56806e+06	6.08606e+06	7.7756e+06	9.46287e+06	9.15759e+06	5.80116e+06	6.82807e+06	4.77411e+06	4.37498e+06	6.93802e+06	9.89509e+06	9.60208e+06	9.09093e+06	8.41093e+06	7.22356e+06
Q6PHZ2;P28652;P11798	8	326.86	Camk2d	1.17717	0.022367	0.815982	0.00516225	0.811275	0.00164058	Q6PHZ2|KCC2D_MOUSE Calcium/calmodulin-dependent protein kinase type II subunit delta OS=Mus musculus GN=Camk2d PE=1 SV=1	3.3725e+06	3.3938e+06	3.64353e+06	3.20769e+06	3.9645e+06	4.80799e+06	4.18953e+06	3.86783e+06	3.95003e+06	3.88161e+06	3.92063e+06	4.31161e+06	4.44031e+06	4.56716e+06	4.43235e+06	3.63212e+06	3.12655e+06	3.11306e+06	3.90717e+06	3.90512e+06
Q6ZQ38	2	97.49	Cand1	1.78038	0.233726	1.26353	0.583877	0.70981	0.953283	Q6ZQ38|CAND1_MOUSE Cullin-associated NEDD8-dissociated protein 1 OS=Mus musculus GN=Cand1 PE=1 SV=2	63091.9	22323.1	51630.9	13292.3	10283.8	90954.9	74683.3	35667	3875.55	80787	1934.3	18820.7	96139.2	27237	82157.5	27383.3	52115	79962.4	76989.1	49473.9
Q6ZQ73	6	246.52	Cand2	1.16095	0.285287	0.933409	0.633254	0.955862	0.765836	Q6ZQ73|CAND2_MOUSE Cullin-associated NEDD8-dissociated protein 2 OS=Mus musculus GN=Cand2 PE=1 SV=2	1.29411e+06	1.36003e+06	1.13786e+06	896886	944162	1.53821e+06	1.38433e+06	1.00713e+06	1.00213e+06	1.60787e+06	827802	1.0429e+06	1.44087e+06	1.2434e+06	1.33818e+06	897565	893842	1.03564e+06	1.51166e+06	1.16201e+06
P35564	12	468.58	Canx	1.17319	0.38449	1.44818	0.0396834	1.21311	0.317184	P35564|CALX_MOUSE Calnexin OS=Mus musculus GN=Canx PE=1 SV=1	5.71525e+06	9.07576e+06	5.12054e+06	4.70295e+06	4.54301e+06	9.03816e+06	7.07982e+06	5.60967e+06	5.0144e+06	7.46534e+06	3.18981e+06	4.50324e+06	4.92415e+06	4.19724e+06	7.22082e+06	5.05233e+06	8.08427e+06	8.17134e+06	6.88344e+06	6.6161e+06
P40124	8	478.65	Cap1	1.43364	0.00019231	1.40428	0.00643965	0.984269	0.876457	P40124|CAP1_MOUSE Adenylyl cyclase-associated protein 1 OS=Mus musculus GN=Cap1 PE=1 SV=4	3.03803e+06	3.64496e+06	3.67229e+06	4.07105e+06	3.20828e+06	5.59085e+06	5.07762e+06	4.69318e+06	5.01542e+06	4.90458e+06	2.75309e+06	3.69164e+06	3.94921e+06	3.75342e+06	3.76909e+06	5.22851e+06	5.79261e+06	4.04265e+06	4.47984e+06	5.61618e+06
Q9CYT6	9	417.95	Cap2	1.11902	0.053514	1.2816	0.00291043	0.966886	0.385945	Q9CYT6|CAP2_MOUSE Adenylyl cyclase-associated protein 2 OS=Mus musculus GN=Cap2 PE=1 SV=1	3.60645e+06	3.65221e+06	3.8385e+06	3.79252e+06	3.62256e+06	4.15493e+06	3.58541e+06	3.8882e+06	4.45091e+06	4.63618e+06	3.46335e+06	3.92535e+06	4.11927e+06	3.62914e+06	4.00913e+06	5.07898e+06	5.47593e+06	5.21988e+06	4.41346e+06	4.34962e+06
P24452	2	107.27	Capg	1.53308	3.20825e-05	0.579698	0.0145641	0.632752	0.00885114	P24452|CAPG_MOUSE Macrophage-capping protein OS=Mus musculus GN=Capg PE=1 SV=2	5.76505e+07	5.83606e+07	4.41322e+07	5.19985e+07	6.05682e+07	8.82817e+07	8.67873e+07	7.79252e+07	8.31333e+07	8.19599e+07	9.5164e+07	6.58702e+07	6.81961e+07	1.21728e+08	8.00325e+07	4.69598e+07	3.74705e+07	3.97219e+07	6.15011e+07	6.41909e+07
O08529;Q91VA3	11	503.21	Capn2	1.18357	0.0337449	1.02401	0.68823	0.976143	0.736141	O08529|CAN2_MOUSE Calpain-2 catalytic subunit OS=Mus musculus GN=Capn2 PE=1 SV=4	2.7884e+06	2.35256e+06	2.75843e+06	2.45813e+06	2.57329e+06	3.56157e+06	2.8884e+06	2.57844e+06	3.03316e+06	3.24298e+06	2.38423e+06	2.4296e+06	2.49798e+06	2.83187e+06	3.10316e+06	2.6612e+06	2.49461e+06	2.71467e+06	2.85184e+06	2.84256e+06
O88456;Q9D7J7	5	299.81	Capns1	1.09162	0.497431	1.09353	0.301776	1.09181	0.341569	O88456|CPNS1_MOUSE Calpain small subunit 1 OS=Mus musculus GN=Capns1 PE=1 SV=1	3.26627e+06	3.52512e+06	3.01283e+06	2.90393e+06	2.51372e+06	4.69645e+06	2.9119e+06	2.7048e+06	3.17788e+06	3.1255e+06	2.46184e+06	2.75273e+06	2.70227e+06	2.42899e+06	3.59606e+06	3.25877e+06	2.74284e+06	3.22814e+06	2.8555e+06	3.16064e+06
Q60865	8	316.96	Caprin1	1.0511	0.65022	1.12112	0.20093	1.01915	0.808034	Q60865|CAPR1_MOUSE Caprin-1 OS=Mus musculus GN=Caprin1 PE=1 SV=2	3.17083e+06	4.16117e+06	3.6591e+06	4.40904e+06	3.91292e+06	5.11949e+06	2.99997e+06	3.83302e+06	4.54739e+06	3.80018e+06	4.36199e+06	4.21584e+06	3.06273e+06	3.18188e+06	4.12768e+06	4.84858e+06	3.72022e+06	4.19989e+06	4.17953e+06	4.29709e+06
P47753	5	377.6	Capza1	1.15656	0.255351	1.18454	0.0305882	1.04496	0.51484	P47753|CAZA1_MOUSE F-actin-capping protein subunit alpha-1 OS=Mus musculus GN=Capza1 PE=1 SV=4	3.08145e+06	3.45508e+06	3.36332e+06	4.07616e+06	3.3959e+06	5.55477e+06	3.46622e+06	3.3191e+06	3.55019e+06	4.20145e+06	3.45589e+06	3.58031e+06	3.1183e+06	2.85603e+06	3.61402e+06	4.52951e+06	4.16106e+06	3.81179e+06	3.50425e+06	3.68582e+06
P47754	10	902.66	Capza2	1.03444	0.537747	1.08122	0.0868027	1.03409	0.356093	P47754|CAZA2_MOUSE F-actin-capping protein subunit alpha-2 OS=Mus musculus GN=Capza2 PE=1 SV=3	3.08454e+07	3.32917e+07	3.11252e+07	3.258e+07	3.20062e+07	3.696e+07	2.95205e+07	2.89147e+07	3.60092e+07	3.39493e+07	3.05221e+07	3.34041e+07	3.12085e+07	2.74106e+07	3.20329e+07	3.53982e+07	3.23637e+07	3.52513e+07	3.13284e+07	3.27922e+07
P47757	10	595.15	Capzb	1.11712	0.0669217	0.97551	0.286542	0.940947	0.1423	P47757|CAPZB_MOUSE F-actin-capping protein subunit beta OS=Mus musculus GN=Capzb PE=1 SV=3	1.41703e+07	1.4721e+07	1.2572e+07	1.50936e+07	1.34148e+07	1.79339e+07	1.45807e+07	1.45311e+07	1.58859e+07	1.5235e+07	1.43377e+07	1.42162e+07	1.50837e+07	1.48817e+07	1.58437e+07	1.47541e+07	1.40241e+07	1.46658e+07	1.46095e+07	1.44883e+07
Q8BYM8	2	75.23	Cars2	1.17496	0.6222	0.63966	0.160347	0.68982	0.183103	Q8BYM8|SYCM_MOUSE Probable cysteine--tRNA ligase, mitochondrial OS=Mus musculus GN=Cars2 PE=1 SV=2	118403	66398.8	62742.8	93594.8	56699.3	1536.42	142398	88724.4	111724	123062	72088.9	67020.2	145441	174464	117714	68559.5	23300.6	54055.4	109702	113292
O09161	19	1682.25	Casq2	1.03734	0.543699	1.04002	0.249918	0.969669	0.50164	O09161|CASQ2_MOUSE Calsequestrin-2 OS=Mus musculus GN=Casq2 PE=1 SV=3	1.82606e+08	2.32259e+08	1.99231e+08	2.08085e+08	2.03421e+08	2.34424e+08	1.99898e+08	1.84504e+08	2.21142e+08	2.23931e+08	2.07075e+08	2.13712e+08	2.07128e+08	1.98689e+08	2.31076e+08	2.13424e+08	2.13188e+08	2.31855e+08	2.13386e+08	2.28158e+08
P51125	13	760.17	Cast	0.977157	0.752953	1.0988	0.326085	0.988642	0.9414	P51125|ICAL_MOUSE Calpastatin OS=Mus musculus GN=Cast PE=1 SV=2	5.92984e+06	7.49115e+06	6.27878e+06	6.96243e+06	7.78055e+06	6.1368e+06	5.98961e+06	7.73298e+06	6.54589e+06	7.25069e+06	8.17377e+06	7.17061e+06	6.40953e+06	5.44025e+06	7.64432e+06	9.2243e+06	7.94915e+06	7.21299e+06	6.54958e+06	7.34453e+06
P24270;Q8BI29	17	946.34	Cat	0.838614	0.0201876	0.863849	0.0220269	1.01292	0.830287	P24270|CATA_MOUSE Catalase OS=Mus musculus GN=Cat PE=1 SV=4	3.04957e+07	2.64817e+07	2.95155e+07	2.47531e+07	2.54848e+07	2.48875e+07	2.55489e+07	2.29176e+07	2.05413e+07	2.0769e+07	2.89645e+07	2.65869e+07	2.8532e+07	2.63846e+07	2.45189e+07	2.14273e+07	2.53855e+07	2.60047e+07	2.09936e+07	2.27974e+07
P49817;P51637	6	214.29	Cav1	1.03239	0.764764	1.06643	0.581418	1.00878	0.943478	P49817|CAV1_MOUSE Caveolin-1 OS=Mus musculus GN=Cav1 PE=1 SV=1	8.70221e+06	1.02118e+07	7.4183e+06	7.25156e+06	7.1385e+06	8.72342e+06	9.09304e+06	7.21403e+06	6.83485e+06	1.0176e+07	6.35305e+06	7.88318e+06	8.10025e+06	8.92382e+06	9.10756e+06	6.29655e+06	1.03803e+07	1.03292e+07	8.52615e+06	7.51739e+06
Q9DA60	1	17.81	CB057_MOUSE	1.27978	0.0178753	0.867325	0.187514	0.943482	0.610975	Q9DA60|CB057_MOUSE Uncharacterized protein C2orf57 homolog OS=Mus musculus PE=2 SV=2	589542	579654	521370	596811	601158	751259	921996	742711	609596	671115	457580	598167	604023	768755	633045	520134	471208	482887	616389	564757
P48758	7	345.12	Cbr1	1.01864	0.791282	0.978534	0.833195	1.00432	0.906522	P48758|CBR1_MOUSE Carbonyl reductase [NADPH] 1 OS=Mus musculus GN=Cbr1 PE=1 SV=3	6.78865e+06	9.09696e+06	6.97062e+06	7.95364e+06	6.56764e+06	7.73285e+06	8.10667e+06	7.32091e+06	7.89454e+06	7.01914e+06	6.96092e+06	1.02832e+07	6.88459e+06	6.62662e+06	6.46156e+06	7.29445e+06	7.06195e+06	6.79318e+06	7.57076e+06	7.69766e+06
P08074	5	379.64	Cbr2	0.83528	0.613329	1.27662	0.0236982	1.81128	0.122712	P08074|CBR2_MOUSE Carbonyl reductase [NADPH] 2 OS=Mus musculus GN=Cbr2 PE=1 SV=1	1.31688e+06	1.31024e+06	4.47556e+06	2.51267e+06	1.18135e+06	2.39076e+06	2.40204e+06	1.1587e+06	1.45373e+06	1.61304e+06	953170	1.19603e+06	1.37099e+06	991144	1.44946e+06	1.46722e+06	1.77469e+06	1.4804e+06	1.4862e+06	1.40115e+06
Q91VT4	7	520.31	Cbr4	1.03076	0.742526	0.848518	0.0552644	0.884793	0.210674	Q91VT4|CBR4_MOUSE Carbonyl reductase family member 4 OS=Mus musculus GN=Cbr4 PE=1 SV=2	1.09801e+07	1.15192e+07	9.66641e+06	1.25599e+07	1.22786e+07	1.09846e+07	1.50363e+07	1.21491e+07	1.00041e+07	1.05836e+07	1.34801e+07	1.24514e+07	1.44143e+07	1.43237e+07	9.75711e+06	1.10667e+07	1.05607e+07	1.06113e+07	1.11488e+07	1.12794e+07
P83917	1	39.97	Cbx1	0.910546	0.414409	1.10313	0.0301398	1.06639	0.351502	P83917|CBX1_MOUSE Chromobox protein homolog 1 OS=Mus musculus GN=Cbx1 PE=1 SV=1	627701	722796	810789	638779	628230	818294	538475	685787	460467	618596	649813	601910	641832	592713	728603	725379	716397	721088	686682	696883
P23198;Q61686	2	158.28	Cbx3	1.1653	0.0179242	1.22648	0.0110375	0.986884	0.867263	P23198|CBX3_MOUSE Chromobox protein homolog 3 OS=Mus musculus GN=Cbx3 PE=1 SV=2	1.54671e+06	1.4767e+06	1.42173e+06	1.40552e+06	1.56284e+06	1.94743e+06	1.60498e+06	1.87756e+06	1.60468e+06	1.60433e+06	1.40419e+06	1.5693e+06	1.40338e+06	1.36271e+06	1.77245e+06	1.92369e+06	2.04297e+06	1.87705e+06	1.68535e+06	1.68432e+06
Q9D8X2	1	24.27	Ccdc124	0.43076	0.0664748	1.57034	0.0779585	1.77461	0.259887	Q9D8X2|CC124_MOUSE Coiled-coil domain-containing protein 124 OS=Mus musculus GN=Ccdc124 PE=1 SV=1	4682.87	29041.3	16737.4	29215.4	17427.2	2940.76	7747.91	2967.47	14741	13431.4	13987.5	13188.8	4575.62	7787.66	15179	13809	13369.5	25954.6	14994.1	17799.6
Q3TC33	2	70.08	Ccdc127	1.19898	0.220504	1.04263	0.76351	0.876408	0.401219	Q3TC33|CC127_MOUSE Coiled-coil domain-containing protein 127 OS=Mus musculus GN=Ccdc127 PE=1 SV=2	372185	431187	539188	304071	341709	327774	593868	462605	503483	496242	347991	474300	357928	622728	465792	372672	585413	513950	477914	415500
Q8BVF4	1	13.62	Ccdc30	0.936687	0.573615	1.22562	0.00172994	1.12003	0.406172	Q8BVF4|CCD30_MOUSE Coiled-coil domain-containing protein 30 OS=Mus musculus GN=Ccdc30 PE=1 SV=1	219387	158493	226018	193312	131037	197873	149150	161385	185547	175523	147159	178363	169566	160399	173282	215064	216792	204942	191190	187770
Q9D024	2	49.75	Ccdc47	0.969778	0.888287	1.4503	0.0242164	1.41246	0.152464	Q9D024|CCD47_MOUSE Coiled-coil domain-containing protein 47 OS=Mus musculus GN=Ccdc47 PE=1 SV=2	110405	222571	160477	143500	99636.1	74788.5	127514	154971	148486	208570	51350	107624	127351	140413	94756	145235	135848	177875	150045	147317
Q3URS9	3	105.53	Ccdc51	1.28904	0.0758159	0.798228	0.132808	0.851267	0.283903	Q3URS9|CCD51_MOUSE Coiled-coil domain-containing protein 51 OS=Mus musculus GN=Ccdc51 PE=1 SV=1	187238	204205	137252	186413	192148	228942	298932	158949	223879	258788	174459	156364	224030	289287	221630	150756	145033	161401	195443	198094
Q8R3Q6	3	230.78	Ccdc58	0.708062	0.00458196	1.1047	0.208308	1.14012	0.12709	Q8R3Q6|CCD58_MOUSE Coiled-coil domain-containing protein 58 OS=Mus musculus GN=Ccdc58 PE=1 SV=1	2.94147e+06	3.12378e+06	3.52904e+06	3.48613e+06	3.02525e+06	2.89368e+06	1.6539e+06	2.07875e+06	2.53437e+06	2.24311e+06	3.10522e+06	3.07417e+06	2.58826e+06	2.1795e+06	3.17912e+06	3.49847e+06	2.95387e+06	3.04525e+06	2.98216e+06	3.12548e+06
Q8C3X2	4	246.27	Ccdc90b	1.08931	0.400138	0.864955	0.165307	0.920519	0.43531	Q8C3X2|CC90B_MOUSE Coiled-coil domain-containing protein 90B, mitochondrial OS=Mus musculus GN=Ccdc90b PE=1 SV=1	1.06273e+06	1.12492e+06	922502	959271	955531	1.1042e+06	1.2225e+06	1.36591e+06	919266	861850	1.12672e+06	957638	1.3605e+06	1.15917e+06	854808	1.01548e+06	807804	887961	999166	1.01123e+06
Q9JJA7	1	13.8	Ccnl2	0.726189	0.00110281	1.1869	0.352128	1.2522	0.0317805	Q9JJA7|CCNL2_MOUSE Cyclin-L2 OS=Mus musculus GN=Ccnl2 PE=1 SV=1	824727	937456	860121	827777	994520	764532	642806	636245	537584	646451	675347	740930	745267	864248	523644	929392	696323	658342	1.28552e+06	643239
Q9WU84	1	66.56	Ccs	0.592044	0.047958	0.903066	0.620792	0.919229	0.718891	Q9WU84|CCS_MOUSE Copper chaperone for superoxide dismutase OS=Mus musculus GN=Ccs PE=1 SV=1	36658.2	40095.6	66842.4	52899.8	56578	41897.9	6740.21	40564.2	39346	21282.7	63703.2	73375	52756.6	54710.2	30766.2	44479.6	22997.1	56470.8	66854.4	57822.3
Q6RUT7	1	23.32	Ccsmst1	1.17991	0.69932	0.967392	0.85901	0.857272	0.374392	Q6RUT7|CSMT1_MOUSE Protein CCSMST1 OS=Mus musculus GN=Ccsmst1 PE=1 SV=1	67423.3	445035	174333	309338	308647	152675	625431	382002	318369	61039.2	334201	301772	377619	256306	252112	264516	222388	183246	346157	456072
P80314	12	884.43	Cct2	1.17484	0.00478835	1.10496	0.00420355	0.993796	0.764234	P80314|TCPB_MOUSE T-complex protein 1 subunit beta OS=Mus musculus GN=Cct2 PE=1 SV=4	7.00908e+06	6.65711e+06	7.2486e+06	7.29702e+06	7.20714e+06	8.91472e+06	7.90359e+06	7.37298e+06	8.549e+06	8.87142e+06	6.84135e+06	7.28979e+06	7.01711e+06	7.29068e+06	7.20113e+06	8.37682e+06	7.63736e+06	7.80793e+06	7.4388e+06	8.11988e+06
P80318;P60334	11	521.07	Cct3	1.26719	0.00274239	1.05153	0.238045	0.896968	0.00532583	P80318|TCPG_MOUSE T-complex protein 1 subunit gamma OS=Mus musculus GN=Cct3 PE=1 SV=1	5.06208e+06	4.93908e+06	5.07859e+06	5.26979e+06	5.51728e+06	6.09128e+06	6.37191e+06	5.76952e+06	7.29579e+06	7.24965e+06	5.83924e+06	5.93738e+06	5.70718e+06	6.01902e+06	5.33524e+06	6.64223e+06	6.05029e+06	5.47031e+06	5.84489e+06	6.31628e+06
P80315	11	551.15	Cct4	1.11111	0.157878	1.15055	0.017458	1.04826	0.290005	P80315|TCPD_MOUSE T-complex protein 1 subunit delta OS=Mus musculus GN=Cct4 PE=1 SV=3	3.01324e+06	3.14125e+06	3.30198e+06	3.63205e+06	3.15426e+06	3.52021e+06	3.45877e+06	2.97223e+06	3.93355e+06	4.16272e+06	2.99182e+06	3.18143e+06	3.18293e+06	3.28845e+06	2.85031e+06	4.05783e+06	3.30524e+06	3.41104e+06	3.40757e+06	3.64597e+06
P80316	14	641.28	Cct5	1.03094	0.486582	1.13563	0.0286644	1.04815	0.327233	P80316|TCPE_MOUSE T-complex protein 1 subunit epsilon OS=Mus musculus GN=Cct5 PE=1 SV=1	5.56035e+06	6.36748e+06	6.26408e+06	6.63185e+06	6.09959e+06	6.97354e+06	5.83528e+06	6.27108e+06	6.20179e+06	6.59859e+06	6.00076e+06	6.62364e+06	5.79678e+06	5.7392e+06	5.3424e+06	7.43626e+06	6.64903e+06	6.81447e+06	6.14324e+06	6.46119e+06
P80317	7	550.13	Cct6a	1.06615	0.0392102	1.05364	0.102056	1.00717	0.833681	P80317|TCPZ_MOUSE T-complex protein 1 subunit zeta OS=Mus musculus GN=Cct6a PE=1 SV=3	2.35215e+06	2.49624e+06	2.48523e+06	2.65097e+06	2.31158e+06	2.68183e+06	2.60432e+06	2.5712e+06	2.55998e+06	2.69219e+06	2.38398e+06	2.32175e+06	2.49098e+06	2.59345e+06	2.41847e+06	2.58445e+06	2.68822e+06	2.52066e+06	2.39741e+06	2.67274e+06
P80313	9	591.31	Cct7	1.21459	0.0116293	1.12073	0.0455177	0.92882	0.137746	P80313|TCPH_MOUSE T-complex protein 1 subunit eta OS=Mus musculus GN=Cct7 PE=1 SV=1	2.7811e+06	3.2578e+06	2.73265e+06	3.18781e+06	2.78017e+06	3.19696e+06	3.46677e+06	3.34096e+06	3.8744e+06	4.02333e+06	2.94723e+06	3.18487e+06	3.26315e+06	3.41791e+06	3.05594e+06	3.32974e+06	3.27155e+06	3.41029e+06	3.78792e+06	3.98547e+06
P42932	12	760.68	Cct8	1.3271	0.007428	1.0924	0.338837	0.997234	0.945879	P42932|TCPQ_MOUSE T-complex protein 1 subunit theta OS=Mus musculus GN=Cct8 PE=1 SV=3	4.72969e+06	4.58505e+06	4.87075e+06	4.0261e+06	3.96304e+06	6.90168e+06	5.27141e+06	5.02775e+06	5.67367e+06	6.55351e+06	3.58014e+06	3.63628e+06	4.87517e+06	5.16217e+06	4.98236e+06	4.11051e+06	4.90031e+06	5.37584e+06	5.06989e+06	4.83429e+06
O35566	1	21.25	Cd151	2.33676	0.332601	0.691362	0.697327	2.96244	0.955983	O35566|CD151_MOUSE CD151 antigen OS=Mus musculus GN=Cd151 PE=1 SV=2	0	31697.4	0	2192.33	0	30529.9	19676.6	2680.86	0	26304.7	0	3333.98	8105.84	0	0	0	0	2535.53	3765.87	1607.66
O54901	1	57.57	Cd200	1.67245	0.304832	1.05336	0.913011	0.763064	0.740806	O54901|OX2G_MOUSE OX-2 membrane glycoprotein OS=Mus musculus GN=Cd200 PE=1 SV=1	14428.8	39085.9	21304	44416.8	11648.9	75804.8	22226.7	19350	18359.8	83156.9	8412.52	16411.6	39731.2	34061	72908.6	7227.07	64320.3	54987.6	44554.5	9587.43
Q1ERP8	1	70.48	Cd300lg	0.750314	0.190397	0.827989	0.0584183	1.01142	0.974676	Q1ERP8|CLM9_MOUSE CMRF35-like molecule 9 OS=Mus musculus GN=Cd300lg PE=1 SV=1	471134	370207	524225	696165	506655	643059	233379	428016	347300	275342	535280	582336	437623	527453	456697	390767	443299	513380	336295	418847
Q64314	3	86.99	Cd34	1.03631	0.648998	1.11684	0.471597	0.868469	0.237871	Q64314|CD34_MOUSE Hematopoietic progenitor cell antigen CD34 OS=Mus musculus GN=Cd34 PE=1 SV=1	592927	700893	594737	701392	510266	652153	559374	743554	653092	604603	727628	759809	674212	523796	884302	878934	1.12338e+06	646328	613856	724333
Q08857	11	447.6	Cd36	1.03346	0.879686	1.25502	0.233061	1.16481	0.483527	Q08857|CD36_MOUSE Platelet glycoprotein 4 OS=Mus musculus GN=Cd36 PE=1 SV=2	1.60704e+07	2.51136e+07	1.37847e+07	1.25907e+07	1.12527e+07	2.17419e+07	1.90908e+07	1.35129e+07	8.77077e+06	1.83331e+07	7.36629e+06	1.29475e+07	1.5921e+07	1.39326e+07	1.74934e+07	9.09923e+06	1.92331e+07	2.05621e+07	1.87372e+07	1.72839e+07
Q61735	1	70.67	Cd47	1.16104	0.553582	1.77994	0.0304873	1.28076	0.321709	Q61735|CD47_MOUSE Leukocyte surface antigen CD47 OS=Mus musculus GN=Cd47 PE=1 SV=2	262400	466565	205559	226401	196907	436989	338656	237472	166994	396381	104972	186735	247187	192623	328659	195623	467414	468044	340601	415362
Q9QWK4	2	46.32	Cd5l	0.705718	0.203144	1.8011	0.17734	1.34275	0.156733	Q9QWK4|CD5L_MOUSE CD5 antigen-like OS=Mus musculus GN=Cd5l PE=1 SV=3	113057	111970	132902	136334	169106	64072.4	79660	179689	118929	25800.4	136791	90777.2	41033.3	77829.3	147606	213708	349802	100918	66125	159254
O89103	3	110.25	Cd93	1.20808	0.130724	0.767077	0.00202436	0.733267	0.00782407	O89103|C1QR1_MOUSE Complement component C1q receptor OS=Mus musculus GN=Cd93 PE=1 SV=1	8.65818e+07	7.0493e+07	9.68737e+07	9.80005e+07	1.11672e+08	1.45012e+08	1.10258e+08	9.05793e+07	1.00386e+08	1.13856e+08	1.18331e+08	1.1116e+08	1.22318e+08	1.41984e+08	1.38474e+08	1.04642e+08	8.86704e+07	1.01338e+08	9.37414e+07	9.66069e+07
Q8BIF0	1	13.07	Cd99l2	#DIV/0!	0.346594	#DIV/0!	#DIV/0!	#DIV/0!	0.9995	Q8BIF0|C99L2_MOUSE CD99 antigen-like protein 2 OS=Mus musculus GN=Cd99l2 PE=1 SV=1	0	0	0	0	0	140461	0	0	0	0	0	0	0	0	0	0	0	0	0	0
Q61081	7	353.98	Cdc37	0.898494	0.169787	1.01872	0.812437	1.26912	0.000457719	Q61081|CDC37_MOUSE Hsp90 co-chaperone Cdc37 OS=Mus musculus GN=Cdc37 PE=1 SV=1	6.04833e+06	6.02727e+06	6.44112e+06	6.44963e+06	5.57308e+06	4.51487e+06	6.11851e+06	5.35803e+06	4.89329e+06	6.5548e+06	4.94867e+06	5.23958e+06	4.3078e+06	4.85501e+06	4.7125e+06	5.87966e+06	4.41908e+06	5.48808e+06	4.11858e+06	4.6087e+06
P60766	4	135.16	Cdc42	1.17223	0.293401	1.32181	0.0220287	1.28276	0.138347	P60766|CDC42_MOUSE Cell division control protein 42 homolog OS=Mus musculus GN=Cdc42 PE=1 SV=2	969062	1.16407e+06	619537	965462	655749	1.21088e+06	1.18405e+06	995639	735506	1.0011e+06	579984	603050	832906	725999	667810	793207	778063	1.12195e+06	869510	944318
Q9WTR5	9	500.81	Cdh13	0.995003	0.972426	1.44904	0.0472403	1.19172	0.306041	Q9WTR5|CAD13_MOUSE Cadherin-13 OS=Mus musculus GN=Cdh13 PE=1 SV=2	1.33241e+07	2.0054e+07	1.29054e+07	1.19571e+07	9.80847e+06	1.54967e+07	1.24798e+07	1.29056e+07	1.14072e+07	1.54199e+07	8.83543e+06	1.02509e+07	1.11611e+07	1.08373e+07	1.60167e+07	1.21748e+07	2.06319e+07	2.10035e+07	1.54543e+07	1.34776e+07
P15116;P39038	8	274.62	Cdh2	1.84625	0.00129273	0.84396	0.308226	0.524337	0.00251797	P15116|CADH2_MOUSE Cadherin-2 OS=Mus musculus GN=Cdh2 PE=1 SV=2	6.03734e+06	8.8975e+06	5.98281e+06	7.23126e+06	9.66756e+06	1.69348e+07	1.33584e+07	1.03683e+07	1.38735e+07	1.52836e+07	9.9636e+06	1.25591e+07	1.48417e+07	1.53532e+07	1.94049e+07	6.95845e+06	1.42954e+07	1.33857e+07	1.22742e+07	1.39548e+07
Q99PF4	1	13.31	Cdh23	1.35341	0.265655	0.750592	0.228975	0.536052	0.073035	Q99PF4|CAD23_MOUSE Cadherin-23 OS=Mus musculus GN=Cdh23 PE=1 SV=2	16468	61260.3	45882.1	108624	99083.1	87698.7	67084.4	83665	125565	84394.8	131151	106279	197707	100393	82539.6	128412	67113.1	61644.8	101251	105496
P55284	1	46.96	Cdh5	12.2054	0.349121	1.60157	0.582357	3.48603	0.816261	P55284|CADH5_MOUSE Cadherin-5 OS=Mus musculus GN=Cdh5 PE=1 SV=2	6430.76	596.327	0	0	109.682	81552.9	751.456	1311.55	1650.76	1840.13	22.9929	413.099	286.152	1325	0	1755.51	161.445	0	115.436	1246.42
Q4VAA2	3	88.03	Cdv3	0.724031	0.145309	1.42407	0.0124106	1.47529	0.0796638	Q4VAA2|CDV3_MOUSE Protein CDV3 OS=Mus musculus GN=Cdv3 PE=1 SV=2	695700	1.52148e+06	1.08086e+06	1.53109e+06	1.32835e+06	1.36919e+06	492665	903880	884040	808430	1.01549e+06	935810	581052	656376	985013	1.25568e+06	1.30755e+06	1.09028e+06	1.30219e+06	987980
E9QA28	1	16.02	Ceacam16	1.00505	0.980946	0.694112	0.253701	0.966625	0.858701	E9QA28|CEA16_MOUSE Carcinoembryonic antigen-related cell adhesion molecule 16 OS=Mus musculus GN=Ceacam16 PE=1 SV=1	94405.7	220570	203023	212741	191653	245195	266988	158773	113560	142531	76246.6	110793	285212	174893	307095	123651	130867	105278	125550	177003
Q91WM2	3	217.87	Cecr5	0.982037	0.917867	1.09449	0.374205	1.04915	0.964451	Q91WM2|CECR5_MOUSE Cat eye syndrome critical region protein 5 homolog OS=Mus musculus GN=Cecr5 PE=1 SV=1	424023	377281	146814	423224	316642	311598	332505	253948	361789	397823	332873	364797	331905	333774	245551	314707	373237	273983	385271	413725
Q9Z0H4	1	26.8	Celf2	0.892617	0.714462	1.3599	0.0954176	1.3359	0.20325	Q9Z0H4|CELF2_MOUSE CUGBP Elav-like family member 2 OS=Mus musculus GN=Celf2 PE=1 SV=1	59909.2	47069	41777.2	85114.7	45270.5	101131	22144.5	41910.7	50851.3	33128.1	52437	34838.2	39986.8	20054	61638	66507.6	61558.3	47031.2	52026.4	57032.3
Q9CXS4	2	138.86	Cenpv	0.937903	0.455991	1.23184	0.0155851	1.20184	0.0116518	Q9CXS4|CENPV_MOUSE Centromere protein V OS=Mus musculus GN=Cenpv PE=1 SV=2	1.01827e+06	1.08041e+06	986968	990595	871475	1.18295e+06	884871	798633	806138	967888	709050	841353	852739	927616	786033	921699	1.08497e+06	1.17961e+06	949834	935129
Q5PR68	1	18.32	Cep112	0.459874	0.000610433	1.52621	0.0458943	2.03075	0.0003174	Q5PR68|CE112_MOUSE Centrosomal protein of 112 kDa OS=Mus musculus GN=Cep112 PE=2 SV=2	840773	1.19445e+06	1.44144e+06	1.2849e+06	1.07402e+06	507974	420243	513967	750632	490813	654647	616874	593559	431369	577159	1.21697e+06	1.00229e+06	966017	542404	658040
P23953;Q8VCC2	16	933.52	Ces1c	1.3016	0.0190289	1.46264	0.0111355	1.06557	0.484954	P23953|EST1C_MOUSE Carboxylesterase 1C OS=Mus musculus GN=Ces1c PE=1 SV=4	3.45377e+07	4.65293e+07	4.23854e+07	3.86508e+07	4.40016e+07	6.61416e+07	5.01187e+07	4.42794e+07	5.66376e+07	5.10893e+07	3.69854e+07	3.54487e+07	3.08674e+07	3.82853e+07	5.18356e+07	5.17121e+07	5.46384e+07	7.26947e+07	5.47912e+07	4.9071e+07
Q8VCT4	8	705.23	Ces1d	0.768346	0.0267531	0.844327	0.0335349	1.16975	0.160352	Q8VCT4|CES1D_MOUSE Carboxylesterase 1D OS=Mus musculus GN=Ces1d PE=1 SV=1	8.1505e+06	8.62963e+06	1.08148e+07	7.05471e+06	7.15372e+06	6.16666e+06	6.51299e+06	6.28861e+06	5.94612e+06	7.20511e+06	6.2476e+06	8.08138e+06	7.91394e+06	6.07514e+06	7.41894e+06	6.32981e+06	6.2938e+06	5.74237e+06	5.85482e+06	5.95293e+06
Q9CQF4	6	287.02	CF203_MOUSE	0.798956	0.00108177	0.976426	0.700618	1.04777	0.426766	Q9CQF4|CF203_MOUSE Uncharacterized protein C6orf203 homolog OS=Mus musculus PE=1 SV=1	6.64881e+06	6.93608e+06	7.34748e+06	6.78292e+06	6.22129e+06	6.03217e+06	5.04067e+06	5.14956e+06	5.78779e+06	5.10364e+06	7.52368e+06	6.63961e+06	6.3781e+06	5.35055e+06	6.49755e+06	6.42948e+06	6.45673e+06	6.65711e+06	6.38416e+06	5.69844e+06
P04186	5	186.98	Cfb	1.21245	0.194439	2.31897	0.000958327	1.79154	0.00237927	P04186|CFAB_MOUSE Complement factor B OS=Mus musculus GN=Cfb PE=1 SV=2	971216	757987	1.19784e+06	978942	686730	1.03124e+06	1.1885e+06	1.10297e+06	1.44154e+06	804195	536083	580010	521996	565822	359644	1.14826e+06	1.38256e+06	1.44666e+06	1.2423e+06	725031
P03953	1	50.95	Cfd	1.1988	0.0809072	1.83192	0.00150168	1.36856	0.022368	P03953|CFAD_MOUSE Complement factor D OS=Mus musculus GN=Cfd PE=1 SV=1	531247	689499	621851	725610	559665	790866	551922	779347	826494	801059	369940	402806	374936	539974	597862	656564	855555	899349	739554	1.03585e+06
P06909	13	426.38	Cfh	1.05692	0.579345	1.71818	2.90074e-06	1.34721	0.00337665	P06909|CFAH_MOUSE Complement factor H OS=Mus musculus GN=Cfh PE=1 SV=2	4.55375e+06	4.69471e+06	5.871e+06	4.3187e+06	4.44454e+06	4.52532e+06	5.04134e+06	5.25003e+06	6.328e+06	4.09749e+06	3.35567e+06	3.82576e+06	3.04741e+06	3.54881e+06	3.94983e+06	6.09158e+06	6.61352e+06	6.15704e+06	5.81118e+06	5.78574e+06
Q61129	4	174.37	Cfi	1.0703	0.73943	2.56944	0.00576567	1.62877	0.00442738	Q61129|CFAI_MOUSE Complement factor I OS=Mus musculus GN=Cfi PE=1 SV=3	408992	582924	512141	534298	424411	858643	402145	433769	611415	329915	381610	328011	231309	225236	345877	713335	989257	1.11389e+06	641817	426797
P18760	6	638.24	Cfl1	1.18335	0.265346	1.24896	0.0212794	0.973284	0.753036	P18760|COF1_MOUSE Cofilin-1 OS=Mus musculus GN=Cfl1 PE=1 SV=3	8.98392e+06	1.20298e+07	1.01632e+07	1.53241e+07	1.34916e+07	1.95679e+07	1.10263e+07	1.40616e+07	1.37602e+07	1.25759e+07	1.29129e+07	1.34708e+07	1.02674e+07	1.08095e+07	1.41788e+07	1.80777e+07	1.4878e+07	1.34029e+07	1.52025e+07	1.54242e+07
P45591	11	653.25	Cfl2	0.815955	0.0379764	1.06422	0.208854	1.11011	0.204539	P45591|COF2_MOUSE Cofilin-2 OS=Mus musculus GN=Cfl2 PE=1 SV=1	2.46933e+07	3.44829e+07	2.81007e+07	3.23604e+07	2.82488e+07	2.78101e+07	1.99613e+07	2.48938e+07	2.55883e+07	2.24148e+07	2.95601e+07	2.71731e+07	2.36802e+07	2.41977e+07	2.86063e+07	2.99066e+07	2.77799e+07	2.76857e+07	2.87949e+07	2.76057e+07
Q8VE95	7	286.34	CH082_MOUSE	0.876654	0.0102729	1.00311	0.948019	1.06789	0.166589	Q8VE95|CH082_MOUSE UPF0598 protein C8orf82 homolog OS=Mus musculus PE=1 SV=1	1.08324e+07	1.0276e+07	1.05544e+07	9.95929e+06	1.02943e+07	8.88485e+06	9.11116e+06	7.90563e+06	9.65248e+06	9.95861e+06	1.09115e+07	9.73959e+06	1.03613e+07	8.75792e+06	8.8455e+06	9.91302e+06	1.01738e+07	9.41854e+06	9.92431e+06	9.33725e+06
Q9CQA6	2	64.99	Chchd1	12.96	0.337295	1.52481	0.0724149	1.02541	0.616933	Q9CQA6|CHCH1_MOUSE Coiled-coil-helix-coiled-coil-helix domain-containing protein 1 OS=Mus musculus GN=Chchd1 PE=1 SV=1	308838	434130	333974	494001	343222	2.29049e+07	428173	500399	569306	404742	609850	398489	481087	279244	98061.6	454392	674616	610234	563666	543506
Q9D1L0	4	247.42	Chchd2	1.01148	0.946142	1.23907	0.0415847	1.09054	0.58393	Q9D1L0|CHCH2_MOUSE Coiled-coil-helix-coiled-coil-helix domain-containing protein 2 OS=Mus musculus GN=Chchd2 PE=2 SV=1	1.04811e+07	1.52783e+07	1.2309e+07	1.98464e+07	1.37446e+07	1.98725e+07	9.81005e+06	1.67508e+07	1.25238e+07	1.35246e+07	1.64195e+07	1.21091e+07	1.1931e+07	1.08795e+07	1.43709e+07	1.68563e+07	1.90005e+07	1.6445e+07	1.44871e+07	1.46308e+07
Q9CRB9	16	675.55	Chchd3	0.871851	0.0324427	0.996075	0.948243	1.04927	0.298681	Q9CRB9|MIC19_MOUSE MICOS complex subunit Mic19 OS=Mus musculus GN=Chchd3 PE=1 SV=1	9.9808e+07	9.2776e+07	9.82882e+07	9.72094e+07	8.73867e+07	9.65115e+07	7.56876e+07	8.06056e+07	8.76674e+07	7.40656e+07	1.03686e+08	8.69222e+07	9.10903e+07	8.87014e+07	8.27427e+07	8.77628e+07	1.0101e+08	9.06921e+07	9.47395e+07	7.71599e+07
Q8VEA4	2	82.16	Chchd4	0.588604	0.116576	0.846342	0.429873	1.23427	0.511939	Q8VEA4|MIA40_MOUSE Mitochondrial intermembrane space import and assembly protein 40 OS=Mus musculus GN=Chchd4 PE=1 SV=1	1.04414e+06	1.74467e+06	1.25223e+06	1.23443e+06	488594	313988	580500	898732	1.25431e+06	345218	1.02638e+06	1.46435e+06	779342	742144	657813	516290	779221	1.04034e+06	684173	932420
Q91VN4	5	269.42	Chchd6	0.821005	0.0786802	1.01553	0.815173	1.15313	0.0666764	Q91VN4|MIC25_MOUSE MICOS complex subunit Mic25 OS=Mus musculus GN=Chchd6 PE=1 SV=2	1.126e+06	1.1983e+06	1.34982e+06	1.45819e+06	1.14124e+06	1.3743e+06	868589	936997	1.04932e+06	921404	1.25095e+06	1.04234e+06	1.0007e+06	1.00034e+06	1.14612e+06	919329	1.08011e+06	1.15428e+06	1.18163e+06	1.18961e+06
Q8K2Q5	2	83.69	Chchd7	0.561334	0.00369869	1.01777	0.893563	1.26194	0.159476	Q8K2Q5|CHCH7_MOUSE Coiled-coil-helix-coiled-coil-helix domain-containing protein 7 OS=Mus musculus GN=Chchd7 PE=1 SV=1	2.2614e+06	2.27317e+06	2.8827e+06	3.26834e+06	1.8028e+06	1.61408e+06	1.19653e+06	1.53699e+06	1.23355e+06	1.42902e+06	2.62747e+06	1.98767e+06	1.78433e+06	1.34764e+06	2.14911e+06	1.80158e+06	1.96128e+06	2.12012e+06	2.50596e+06	1.68312e+06
A3KFM7	1	25.85	Chd6	1.08104	0.847366	1.00201	0.99621	0.867673	0.770852	A3KFM7|CHD6_MOUSE Chromodomain-helicase-DNA-binding protein 6 OS=Mus musculus GN=Chd6 PE=1 SV=1	470414	637485	434141	417336	887668	77647.3	189486	1.07614e+06	1.10245e+06	632054	1.32697e+06	368071	897268	602040	86896.8	910493	1.16553e+06	475581	329809	406410
Q8BJF9	1	22.96	Chmp2b	0.811312	0.204832	1.35966	0.121789	1.32357	0.0998102	Q8BJF9|CHM2B_MOUSE Charged multivesicular body protein 2b OS=Mus musculus GN=Chmp2b PE=1 SV=1	129170	191123	124201	177907	145847	184028	110641	125748	117284	85588.3	125255	164292	114630	70186.5	106073	117366	122287	195501	208395	145644
Q9CQ10	2	62.97	Chmp3	1.00347	0.988194	2.34834	0.00804653	1.47026	0.134104	Q9CQ10|CHMP3_MOUSE Charged multivesicular body protein 3 OS=Mus musculus GN=Chmp3 PE=1 SV=3	63288.1	82188	86188.3	125216	99634.1	61239.1	91311.4	68281.4	161052	76217.5	77130.9	114581	64143.8	24763.2	29880	158327	159751	191553	131782	87743.7
Q9D8B3	3	152.69	Chmp4b	0.999264	0.996603	1.91425	0.0102945	1.30028	0.0956488	Q9D8B3|CHM4B_MOUSE Charged multivesicular body protein 4b OS=Mus musculus GN=Chmp4b PE=1 SV=2	1.68541e+06	2.8166e+06	2.16302e+06	2.23423e+06	1.84665e+06	3.28947e+06	1.49675e+06	1.90588e+06	1.93785e+06	2.10805e+06	1.84761e+06	1.79701e+06	1.28041e+06	1.1881e+06	2.15119e+06	2.7975e+06	3.44214e+06	4.64793e+06	2.63165e+06	2.30074e+06
P61022	2	115.1	Chp1	1.86205	7.63508e-06	0.716958	0.017533	0.597076	0.00289351	P61022|CHP1_MOUSE Calcineurin B homologous protein 1 OS=Mus musculus GN=Chp1 PE=1 SV=2	307314	266744	229887	245629	273010	493124	470998	548736	509586	440280	283950	509894	463456	465191	492613	288639	306381	339491	344053	309571
Q8WTY4	2	79.98	Ciapin1	0.861724	0.0896219	1.03824	0.649947	1.17206	0.0929589	Q8WTY4|CPIN1_MOUSE Anamorsin OS=Mus musculus GN=Ciapin1 PE=1 SV=1	947223	1.10384e+06	1.12063e+06	1.21716e+06	1.00101e+06	1.15117e+06	847868	949020	798543	897968	860756	966995	849161	749277	1.17243e+06	983511	992960	957050	959560	881366
Q91WS0	7	342.16	Cisd1	0.98113	0.812994	0.964282	0.673578	1.00983	0.947285	Q91WS0|CISD1_MOUSE CDGSH iron-sulfur domain-containing protein 1 OS=Mus musculus GN=Cisd1 PE=1 SV=1	3.72737e+07	4.32847e+07	2.7727e+07	3.72332e+07	3.70101e+07	3.30803e+07	3.98613e+07	3.28102e+07	3.67738e+07	3.65589e+07	3.33244e+07	3.53318e+07	3.50195e+07	4.45521e+07	3.25244e+07	2.92361e+07	3.65744e+07	3.2063e+07	4.10377e+07	3.5385e+07
B1AR13	4	87.73	Cisd3	0.867872	0.109247	1.05151	0.607923	1.0731	0.458928	B1AR13|CISD3_MOUSE CDGSH iron-sulfur domain-containing protein 3, mitochondrial OS=Mus musculus GN=Cisd3 PE=1 SV=1	1.15456e+06	1.11689e+06	964721	1.31899e+06	1.26744e+06	801116	1.02667e+06	1.16094e+06	1.00562e+06	1.05891e+06	1.25828e+06	1.01347e+06	963103	1.34774e+06	843384	1.09392e+06	1.24578e+06	1.11645e+06	1.24191e+06	1.00742e+06
Q8BMK4	2	114.05	Ckap4	1.20896	0.541335	1.71446	0.0302851	1.05417	0.981587	Q8BMK4|CKAP4_MOUSE Cytoskeleton-associated protein 4 OS=Mus musculus GN=Ckap4 PE=1 SV=2	122969	400541	136663	252103	169417	128538	337033	318152	158658	365345	120514	151271	275740	195691	282891	233217	494124	368701	384812	278364
Q04447	10	928.94	Ckb	1.20907	0.0534829	1.15987	0.0811736	1.0141	0.761009	Q04447|KCRB_MOUSE Creatine kinase B-type OS=Mus musculus GN=Ckb PE=1 SV=1	1.74028e+07	1.67601e+07	1.91215e+07	1.74845e+07	1.64704e+07	2.40924e+07	1.86388e+07	1.63103e+07	2.25811e+07	2.38558e+07	1.5646e+07	1.75528e+07	1.73732e+07	1.52296e+07	2.02243e+07	2.33689e+07	2.06226e+07	1.98926e+07	1.9011e+07	1.68836e+07
P07310	37	2760.94	Ckm	0.99277	0.895481	0.99906	0.978854	0.977173	0.531121	P07310|KCRM_MOUSE Creatine kinase M-type OS=Mus musculus GN=Ckm PE=1 SV=1	1.21524e+09	1.19423e+09	1.2459e+09	1.28642e+09	1.32822e+09	1.33259e+09	1.07846e+09	1.11314e+09	1.38739e+09	1.31309e+09	1.37907e+09	1.34476e+09	1.27837e+09	1.23201e+09	1.18226e+09	1.37033e+09	1.28271e+09	1.2752e+09	1.21022e+09	1.27199e+09
Q6P8J7;P30275	41	3469.92	Ckmt2	1.08378	0.216881	0.78299	0.000172818	0.837414	0.00673955	Q6P8J7|KCRS_MOUSE Creatine kinase S-type, mitochondrial OS=Mus musculus GN=Ckmt2 PE=1 SV=1	1.44249e+09	1.25034e+09	1.46903e+09	1.49944e+09	1.62603e+09	1.77314e+09	1.63707e+09	1.35857e+09	1.59948e+09	1.52962e+09	1.8801e+09	1.75171e+09	1.77184e+09	1.61931e+09	1.67922e+09	1.43977e+09	1.23431e+09	1.39434e+09	1.41276e+09	1.33252e+09
Q9Z1Q5	3	171.36	Clic1	1.17332	0.0148518	1.63038	1.19386e-05	1.2572	0.00194255	Q9Z1Q5|CLIC1_MOUSE Chloride intracellular channel protein 1 OS=Mus musculus GN=Clic1 PE=1 SV=3	1.27869e+06	1.35713e+06	1.25205e+06	1.15937e+06	1.27263e+06	1.51191e+06	1.27925e+06	1.41022e+06	1.57532e+06	1.63855e+06	1.03321e+06	1.08648e+06	1.05648e+06	844435	1.00634e+06	1.66947e+06	1.67087e+06	1.49898e+06	1.79563e+06	1.5609e+06
Q9QYB1	7	318.05	Clic4	1.21825	0.00904105	1.08741	0.13605	0.998766	0.989484	Q9QYB1|CLIC4_MOUSE Chloride intracellular channel protein 4 OS=Mus musculus GN=Clic4 PE=1 SV=3	5.45153e+06	4.96599e+06	5.26001e+06	4.99414e+06	4.8105e+06	7.29235e+06	5.77485e+06	5.56846e+06	6.00824e+06	6.39974e+06	4.86517e+06	5.5623e+06	4.72085e+06	5.58346e+06	4.78188e+06	6.14831e+06	5.56482e+06	5.52259e+06	4.96497e+06	5.54322e+06
Q8BXK9	3	106.52	Clic5	1.19943	0.113174	1.12019	0.237115	0.971705	0.824637	Q8BXK9|CLIC5_MOUSE Chloride intracellular channel protein 5 OS=Mus musculus GN=Clic5 PE=1 SV=1	976238	1.04842e+06	960881	797798	914204	1.04317e+06	1.07049e+06	954759	1.50545e+06	1.0605e+06	1.16954e+06	788249	1.0841e+06	981897	810540	1.02005e+06	1.10474e+06	1.14828e+06	921105	1.22118e+06
Q922J3;Q9Z0H8	20	1030.27	Clip1	0.85543	0.0625096	0.866499	0.0341466	0.949981	0.518024	Q922J3|CLIP1_MOUSE CAP-Gly domain-containing linker protein 1 OS=Mus musculus GN=Clip1 PE=1 SV=1	5.64573e+06	7.9471e+06	6.38571e+06	7.16987e+06	7.64604e+06	5.75256e+06	5.29885e+06	6.41658e+06	6.25274e+06	6.04348e+06	7.72064e+06	8.27427e+06	6.27265e+06	6.75158e+06	7.60732e+06	6.74001e+06	5.97748e+06	6.31353e+06	6.15991e+06	6.54586e+06
Q60649	6	249.42	Clpb	1.00192	0.987928	0.915713	0.408645	0.984169	0.79913	Q60649|CLPB_MOUSE Caseinolytic peptidase B protein homolog OS=Mus musculus GN=Clpb PE=1 SV=1	995322	1.56439e+06	1.25966e+06	1.12456e+06	1.32668e+06	1.69365e+06	1.33501e+06	1.12524e+06	1.06294e+06	1.06579e+06	1.37899e+06	1.30566e+06	1.37163e+06	1.2438e+06	1.07139e+06	1.37086e+06	801490	1.20286e+06	1.39646e+06	1.06278e+06
O88696	3	217.86	Clpp	0.917956	0.4793	0.998119	0.962566	1.06651	0.161934	O88696|CLPP_MOUSE ATP-dependent Clp protease proteolytic subunit, mitochondrial OS=Mus musculus GN=Clpp PE=1 SV=1	7.57263e+06	7.54774e+06	8.07487e+06	7.34491e+06	6.98736e+06	1.00305e+07	5.91132e+06	5.53388e+06	6.77292e+06	6.19997e+06	6.4149e+06	7.41977e+06	7.52523e+06	6.45545e+06	7.37189e+06	7.05855e+06	7.38232e+06	6.6777e+06	6.89812e+06	7.10437e+06
Q9JHS4	2	75.27	Clpx	1.25221	0.291269	1.03008	0.707976	0.994818	0.854947	Q9JHS4|CLPX_MOUSE ATP-dependent Clp protease ATP-binding subunit clpX-like, mitochondrial OS=Mus musculus GN=Clpx PE=1 SV=2	115629	121280	104060	172902	164284	250666	164263	103352	123643	207268	125755	145222	121194	132331	157185	156878	110288	136189	148451	150385
O08585	1	29.68	Clta	0.633355	0.00394624	1.45238	0.00383564	1.41081	0.00456786	O08585|CLCA_MOUSE Clathrin light chain A OS=Mus musculus GN=Clta PE=1 SV=2	330521	409718	334313	385766	300588	231743	150259	305298	231923	196054	241841	307113	212557	216213	270430	392365	327361	419333	374382	299350
Q6IRU5	3	93.86	Cltb	0.869552	0.232941	1.1565	0.0360708	1.15272	0.180018	Q6IRU5|CLCB_MOUSE Clathrin light chain B OS=Mus musculus GN=Cltb PE=1 SV=1	3.37077e+06	4.97699e+06	3.59728e+06	4.39327e+06	3.40035e+06	4.06562e+06	2.88677e+06	3.68132e+06	2.8436e+06	3.68649e+06	3.47799e+06	3.98788e+06	3.07178e+06	3.5154e+06	3.07052e+06	3.79367e+06	4.40879e+06	3.8064e+06	4.08346e+06	3.71111e+06
Q68FD5	19	965.71	Cltc	1.61881	0.0239257	1.28699	0.0498183	0.873499	0.386024	Q68FD5|CLH1_MOUSE Clathrin heavy chain 1 OS=Mus musculus GN=Cltc PE=1 SV=3	6.81044e+06	6.36774e+06	5.99452e+06	3.71958e+06	4.7527e+06	1.07511e+07	9.28587e+06	7.45449e+06	5.62548e+06	1.1635e+07	4.4527e+06	5.46136e+06	7.68062e+06	6.59524e+06	7.45864e+06	6.28605e+06	8.55307e+06	8.58106e+06	9.20586e+06	8.10549e+06
Q06890	13	608.71	Clu	0.922031	0.369818	1.33896	0.00905178	1.30461	0.0217151	Q06890|CLUS_MOUSE Clusterin OS=Mus musculus GN=Clu PE=1 SV=1	1.77359e+07	2.03096e+07	2.30857e+07	1.71855e+07	1.50363e+07	1.82885e+07	1.51739e+07	1.88895e+07	1.70848e+07	1.66376e+07	1.39386e+07	1.47119e+07	1.28558e+07	1.27757e+07	1.72743e+07	1.84313e+07	2.24176e+07	2.09217e+07	1.82876e+07	1.57526e+07
Q5SW19	2	38.51	Cluh	1.08705	0.695915	1.07721	0.675844	1.03729	0.918546	Q5SW19|CLU_MOUSE Clustered mitochondria protein homolog OS=Mus musculus GN=Cluh PE=1 SV=2	515619	275730	367637	218358	220847	311130	411947	290192	256096	467944	179666	264662	403992	289759	402661	255667	248780	415400	388664	351192
Q8R4N0	14	1265.41	Clybl	0.973561	0.640408	0.857908	0.000443931	0.922402	0.0117261	Q8R4N0|CLYBL_MOUSE Citrate lyase subunit beta-like protein, mitochondrial OS=Mus musculus GN=Clybl PE=1 SV=2	2.96575e+07	3.13795e+07	3.10627e+07	2.9968e+07	2.97024e+07	3.5796e+07	2.91484e+07	2.66214e+07	2.82957e+07	2.7896e+07	3.38245e+07	3.15327e+07	3.40232e+07	3.08852e+07	3.42722e+07	2.80234e+07	2.75471e+07	2.78927e+07	2.7835e+07	2.98602e+07
Q99KK2	1	16.76	Cmas	1.21973	0.194373	1.10567	0.138526	0.822297	0.104474	Q99KK2|NEUA_MOUSE N-acylneuraminate cytidylyltransferase OS=Mus musculus GN=Cmas PE=1 SV=2	314912	380187	388104	523296	525489	668573	375795	548816	566977	440285	559650	504464	437585	486228	604793	578645	549167	626876	580240	531756
Q8R1G2	5	190.77	Cmbl	1.10689	0.651502	0.757868	0.00154143	0.948255	0.399933	Q8R1G2|CMBL_MOUSE Carboxymethylenebutenolidase homolog OS=Mus musculus GN=Cmbl PE=1 SV=1	1.44613e+06	1.34456e+06	1.59179e+06	1.6493e+06	1.58852e+06	3.0414e+06	1.41161e+06	1.18576e+06	1.29664e+06	1.49942e+06	1.59735e+06	1.39073e+06	1.58709e+06	1.6171e+06	1.84386e+06	1.1946e+06	1.15473e+06	1.12384e+06	1.35231e+06	1.26484e+06
Q9CPZ8	2	76.13	Cmc1	0.608777	0.249163	1.03248	0.855777	1.47673	0.274567	Q9CPZ8|COXM1_MOUSE COX assembly mitochondrial protein homolog OS=Mus musculus GN=Cmc1 PE=1 SV=1	320609	447735	414880	1.2004e+06	490693	322872	183769	328938	679043	235194	485433	494908	318992	237961	409111	377525	346935	328682	581904	374584
Q8K199	1	16.77	Cmc2	0.426692	0.00127829	0.788775	0.173884	1.29516	0.0927819	Q8K199|COXM2_MOUSE COX assembly mitochondrial protein 2 homolog OS=Mus musculus GN=Cmc2 PE=3 SV=1	443965	525228	555567	722159	429407	302053	139697	299446	148882	251890	561726	464840	358047	330140	351655	266663	393928	221350	429942	318048
Q9DBP5	4	212.81	Cmpk1	0.988391	0.873926	1.14291	0.0900875	1.04348	0.546543	Q9DBP5|KCY_MOUSE UMP-CMP kinase OS=Mus musculus GN=Cmpk1 PE=1 SV=1	2.52823e+06	3.02344e+06	2.73553e+06	2.98417e+06	2.60107e+06	3.26107e+06	2.19444e+06	2.70108e+06	2.80344e+06	2.75138e+06	2.75512e+06	2.78712e+06	2.36783e+06	2.14813e+06	3.23622e+06	3.20121e+06	3.09761e+06	2.84626e+06	2.97231e+06	3.07695e+06
Q70KF4	15	705.06	Cmya5	0.78638	0.0209887	0.865864	0.244518	1.00704	0.854156	Q70KF4|CMYA5_MOUSE Cardiomyopathy-associated protein 5 OS=Mus musculus GN=Cmya5 PE=1 SV=2	4.99731e+06	4.09712e+06	5.28974e+06	5.05732e+06	5.15274e+06	3.05669e+06	3.53183e+06	4.85032e+06	3.79671e+06	4.10484e+06	5.464e+06	5.54579e+06	4.08812e+06	3.6191e+06	5.70538e+06	4.7189e+06	3.17393e+06	4.1119e+06	4.85216e+06	4.28958e+06
Q8BH86	15	738.22	CN159_MOUSE	0.927551	0.264173	0.645925	5.69975e-05	0.876209	0.0269749	Q8BH86|CN159_MOUSE UPF0317 protein C14orf159 homolog, mitochondrial OS=Mus musculus PE=1 SV=1	8.83106e+06	8.10694e+06	8.27001e+06	9.44001e+06	9.56186e+06	8.11891e+06	9.91738e+06	7.92427e+06	7.53499e+06	7.51137e+06	1.0337e+07	1.07041e+07	9.44566e+06	1.08867e+07	9.08243e+06	6.58351e+06	6.10767e+06	5.83192e+06	6.4776e+06	7.58997e+06
Q9CQE8	6	286.11	CN166_MOUSE	1.06584	0.24575	1.22366	0.0636301	1.0708	0.403627	Q9CQE8|CN166_MOUSE UPF0568 protein C14orf166 homolog OS=Mus musculus PE=1 SV=1	1.03796e+06	1.21136e+06	1.19518e+06	1.20257e+06	1.14071e+06	1.37087e+06	1.09575e+06	1.14985e+06	1.22804e+06	1.32431e+06	1.05966e+06	1.14108e+06	992892	810657	1.4008e+06	1.47319e+06	1.38855e+06	1.30551e+06	1.12751e+06	1.31924e+06
P53996	1	48.08	Cnbp	0.781324	0.171102	1.14893	0.453201	1.09759	0.530987	P53996|CNBP_MOUSE Cellular nucleic acid-binding protein OS=Mus musculus GN=Cnbp PE=1 SV=2	49602.7	40504.6	40157.2	69899.1	44417.8	29033.3	31257.2	53265.4	43458.8	34082.5	64139.3	62766.9	32086.2	32373.4	31468.7	59846.8	43214.6	46175.5	58580.4	48203.8
Q9D1A2	9	440.05	Cndp2	1.08024	0.20463	1.42131	9.3295e-05	1.1968	1.50633e-05	Q9D1A2|CNDP2_MOUSE Cytosolic non-specific dipeptidase OS=Mus musculus GN=Cndp2 PE=1 SV=1	5.11252e+06	5.28922e+06	5.28987e+06	5.30139e+06	5.03923e+06	6.20422e+06	4.97079e+06	4.97678e+06	5.57947e+06	6.38965e+06	4.19407e+06	4.33264e+06	4.29521e+06	4.30585e+06	4.62369e+06	6.66011e+06	6.736e+06	6.28586e+06	5.68689e+06	5.54679e+06
Q08091	4	153.12	Cnn1	1.13165	0.449348	0.943199	0.606169	0.739702	0.0286947	Q08091|CNN1_MOUSE Calponin-1 OS=Mus musculus GN=Cnn1 PE=1 SV=1	2.67365e+06	1.81976e+06	2.73101e+06	2.10159e+06	1.64996e+06	1.83935e+06	3.21513e+06	3.10179e+06	2.35404e+06	1.91064e+06	2.68153e+06	2.86656e+06	3.07278e+06	2.57259e+06	3.64491e+06	3.13808e+06	3.54868e+06	2.36504e+06	2.76913e+06	2.1746e+06
Q9DAW9	1	56.97	Cnn3	0.0519428	0.102201	12.7134	0.0249743	4.4835	0.807992	Q9DAW9|CNN3_MOUSE Calponin-3 OS=Mus musculus GN=Cnn3 PE=1 SV=1	0	48561.6	17297	0	21444.5	0	4534.76	0	0	0	0	0	4493.89	10359.4	4618.78	51729.5	111639	29888.7	36411.9	17887.9
Q9D2R6	1	37.45	Coa3	1.07185	0.579207	0.971637	0.639971	0.968382	0.652202	Q9D2R6|COA3_MOUSE Cytochrome c oxidase assembly factor 3 homolog, mitochondrial OS=Mus musculus GN=Coa3 PE=1 SV=1	924567	1.28961e+06	1.05926e+06	1.55141e+06	1.11306e+06	1.62287e+06	1.2629e+06	996321	1.26191e+06	1.22054e+06	1.17466e+06	1.11745e+06	1.37261e+06	1.1661e+06	1.30098e+06	1.32344e+06	1.1565e+06	1.27956e+06	1.18248e+06	1.0159e+06
Q8BGD8	1	62.3	Coa6	0.134744	0.129209	1.40338	0.413122	1.9681	0.462745	Q8BGD8|COA6_MOUSE Cytochrome c oxidase assembly factor 6 homolog OS=Mus musculus GN=Coa6 PE=1 SV=1	14846.5	192023	0	216507	33878	23305.2	3063.67	22844.3	0	12399.1	97747.7	39616.8	34893.5	31545.2	28529.5	34335.3	73794.3	55630.1	128301	33990.8
Q921H9	2	63.79	Coa7	0.76098	0.111025	0.743801	0.00707914	0.940556	0.552785	Q921H9|COA7_MOUSE Cytochrome c oxidase assembly factor 7 OS=Mus musculus GN=Coa7 PE=1 SV=1	1.12014e+06	1.46335e+06	713335	1.56257e+06	1.34361e+06	945040	823564	775699	1.02742e+06	1.14863e+06	1.32289e+06	1.48417e+06	1.1471e+06	1.20638e+06	1.43449e+06	1.09677e+06	1.01509e+06	906157	1.13256e+06	754821
Q3UMF0	2	57.09	Cobll1	0.501695	0.0140411	0.813486	0.493648	1.50822	0.136907	Q3UMF0|COBL1_MOUSE Cordon-bleu protein-like 1 OS=Mus musculus GN=Cobll1 PE=1 SV=2	84662.7	66935	87618.8	112434	97559.7	20255.2	27243	70973.3	78179.9	28715.1	58554.5	94648.7	79983.8	14415.3	50238.9	75039.1	48549.4	32520.6	44951.4	41229.1
O35206	12	468.14	Col15a1	1.18483	0.0265727	1.32018	0.00473544	0.957797	0.436618	O35206|COFA1_MOUSE Collagen alpha-1(XV) chain OS=Mus musculus GN=Col15a1 PE=1 SV=2	6.96381e+06	8.26782e+06	8.78406e+06	8.48399e+06	8.51123e+06	1.09396e+07	8.41608e+06	9.02435e+06	9.76692e+06	1.04442e+07	8.59407e+06	9.18957e+06	7.9979e+06	7.80649e+06	9.22991e+06	1.29777e+07	1.23929e+07	1.13981e+07	1.02324e+07	9.52618e+06
P39061	5	233.87	Col18a1	1.54553	0.0873464	3.29948	0.0140805	1.25434	0.364652	P39061|COIA1_MOUSE Collagen alpha-1(XVIII) chain OS=Mus musculus GN=Col18a1 PE=1 SV=4	1.3154e+06	736014	820205	1.15386e+06	326956	1.94915e+06	1.19633e+06	1.44143e+06	916140	1.22376e+06	287670	512602	567301	236071	1.86625e+06	2.82257e+06	3.47355e+06	2.40515e+06	1.50499e+06	1.24259e+06
P11087	6	190.43	Col1a1	0.692403	0.0418572	1.54346	0.121294	1.13852	0.444448	P11087|CO1A1_MOUSE Collagen alpha-1(I) chain OS=Mus musculus GN=Col1a1 PE=1 SV=4	2.50406e+07	3.86274e+07	3.67809e+07	3.27804e+07	2.0456e+07	2.0736e+07	2.3407e+07	2.67925e+07	1.63429e+07	1.91339e+07	2.33098e+07	5.0283e+07	2.09447e+07	1.47155e+07	2.57339e+07	4.28107e+07	6.30662e+07	3.86602e+07	3.57444e+07	2.80654e+07
Q01149	5	145.3	Col1a2	0.621086	0.0317438	1.67596	0.106539	1.15286	0.447424	Q01149|CO1A2_MOUSE Collagen alpha-2(I) chain OS=Mus musculus GN=Col1a2 PE=1 SV=2	7.52226e+06	1.29877e+07	1.23808e+07	1.139e+07	6.61439e+06	6.60662e+06	6.28297e+06	8.80088e+06	4.64904e+06	5.27076e+06	7.19763e+06	1.67512e+07	7.14682e+06	5.26033e+06	7.7907e+06	1.50151e+07	2.43982e+07	1.36224e+07	1.15885e+07	9.36389e+06
P02463	2	42.96	Col4a1	0.731186	0.0740712	1.55514	0.100728	1.15371	0.419703	P02463|CO4A1_MOUSE Collagen alpha-1(IV) chain OS=Mus musculus GN=Col4a1 PE=1 SV=4	1.4488e+07	2.15851e+07	2.10306e+07	2.02435e+07	1.17228e+07	1.38712e+07	1.35905e+07	1.69023e+07	1.02286e+07	1.0534e+07	1.29741e+07	2.36931e+07	1.38793e+07	1.1069e+07	1.55878e+07	2.27321e+07	3.95253e+07	2.21068e+07	2.00259e+07	1.56719e+07
Q3U962	2	62.77	Col5a2	0.924317	0.7107	2.19519	0.0152868	1.10667	0.632491	Q3U962|CO5A2_MOUSE Collagen alpha-2(V) chain OS=Mus musculus GN=Col5a2 PE=1 SV=1	464392	673426	643098	627470	295377	761757	394895	602798	392823	346862	573933	703490	322162	291671	551900	1.19195e+06	1.63222e+06	1.104e+06	812334	622688
Q04857	29	2024.67	Col6a1	1.19409	0.0525034	1.01332	0.788248	0.824926	0.00361454	Q04857|CO6A1_MOUSE Collagen alpha-1(VI) chain OS=Mus musculus GN=Col6a1 PE=1 SV=1	5.50116e+07	5.78031e+07	5.44868e+07	6.62073e+07	5.96662e+07	8.2124e+07	7.50647e+07	5.46496e+07	6.82992e+07	6.99396e+07	6.85828e+07	7.25666e+07	6.4137e+07	7.24777e+07	7.76316e+07	7.70968e+07	7.70599e+07	7.40186e+07	6.71295e+07	6.48247e+07
Q02788	20	1009.73	Col6a2	1.21476	0.0261092	1.05952	0.392961	0.843221	0.011438	Q02788|CO6A2_MOUSE Collagen alpha-2(VI) chain OS=Mus musculus GN=Col6a2 PE=1 SV=3	3.76478e+07	3.75703e+07	3.71727e+07	4.63748e+07	4.0748e+07	5.43142e+07	5.06497e+07	3.88358e+07	5.07655e+07	4.77967e+07	4.51967e+07	4.64647e+07	4.33029e+07	5.05509e+07	5.10938e+07	4.97007e+07	5.82712e+07	5.39555e+07	4.52262e+07	4.35388e+07
Q8C6K9;A6H584	5	137.28	Col6a6	0.434138	0.00169624	0.709755	0.0692039	0.937227	0.413209	Q8C6K9|CO6A6_MOUSE Collagen alpha-6(VI) chain OS=Mus musculus GN=Col6a6 PE=1 SV=2	342579	392995	412612	553224	406549	96587.7	324153	166478	156935	170993	434327	454056	404935	447061	508766	269767	544142	335261	232239	214932
Q8K297	1	29.12	Colgalt1	1.413	0.0193226	1.01827	0.891598	1.17676	0.13567	Q8K297|GT251_MOUSE Procollagen galactosyltransferase 1 OS=Mus musculus GN=Colgalt1 PE=1 SV=2	5.53391e+06	5.71347e+06	6.33605e+06	6.84501e+06	6.28386e+06	1.04891e+07	1.06492e+07	6.27065e+06	7.76572e+06	8.22192e+06	5.94295e+06	6.38493e+06	5.69117e+06	4.30665e+06	3.77339e+06	6.04186e+06	3.73228e+06	4.99912e+06	5.48981e+06	6.31281e+06
Q63829	1	19.75	Commd3	1.34429	0.463332	1.09256	0.765549	0.803753	0.453146	Q63829|COMD3_MOUSE COMM domain-containing protein 3 OS=Mus musculus GN=Commd3 PE=1 SV=1	11648.6	21954.5	33983.5	19794.1	72714.2	14819.8	51672.6	45221.9	32456.5	71043.2	33957.3	18726.3	39992.9	28844.5	77663.2	60441.8	44341.4	22070.3	51308.5	39458.3
O88587	6	407.47	Comt	0.991337	0.893587	1.20422	0.0040487	1.04062	0.56153	O88587|COMT_MOUSE Catechol O-methyltransferase OS=Mus musculus GN=Comt PE=1 SV=2	2.49959e+06	3.03452e+06	2.63358e+06	3.37102e+06	2.9236e+06	2.97637e+06	3.15734e+06	2.70479e+06	2.88486e+06	2.61367e+06	2.77843e+06	2.78622e+06	2.5305e+06	2.94068e+06	2.86201e+06	3.17708e+06	3.06669e+06	3.26425e+06	3.77932e+06	3.44876e+06
Q8BIG7	1	61.55	Comtd1	1.10454	0.329799	1.23101	0.0943473	1.03403	0.72976	Q8BIG7|CMTD1_MOUSE Catechol O-methyltransferase domain-containing protein 1 OS=Mus musculus GN=Comtd1 PE=1 SV=1	248798	188803	242505	182352	191221	269693	215082	190879	268619	219558	205991	214229	242590	222903	133290	240255	251725	198154	266140	298131
Q8CIE6	2	130.81	Copa	1.40138	0.269178	1.25944	0.154467	0.933731	0.677735	Q8CIE6|COPA_MOUSE Coatomer subunit alpha OS=Mus musculus GN=Copa PE=1 SV=2	165336	108898	78064.4	105424	127388	30834.5	160786	168334	211730	248278	129919	121596	135628	160178	79315	201451	152247	128958	119598	186954
O55029	2	56.41	Copb2	1.44168	0.0294751	1.18747	0.191312	0.94322	0.696679	O55029|COPB2_MOUSE Coatomer subunit beta' OS=Mus musculus GN=Copb2 PE=1 SV=2	104276	75502.7	140453	111915	120408	128899	149690	169825	135471	212722	103406	93502.7	127291	161468	100150	173809	132131	125880	138992	124829
O89079	2	54.51	Cope	1.74082	0.00254738	1.34149	0.262984	0.777261	0.451338	O89079|COPE_MOUSE Coatomer subunit epsilon OS=Mus musculus GN=Cope PE=1 SV=3	110951	123251	95821.9	102481	51081.9	206687	171985	138068	165013	160083	133285	195022	71364.6	67511.7	154984	202423	115853	130621	136622	249115
P61202	4	129.62	Cops2	1.14688	0.0866376	1.09202	0.309291	1.07831	0.362555	P61202|CSN2_MOUSE COP9 signalosome complex subunit 2 OS=Mus musculus GN=Cops2 PE=1 SV=1	437030	425498	521939	441076	415503	454024	587609	480080	473452	575049	327415	360719	463037	438516	488606	517033	454254	444070	441514	412672
O88543	1	20.99	Cops3	1.21647	0.274101	0.9729	0.882113	0.951818	0.882947	O88543|CSN3_MOUSE COP9 signalosome complex subunit 3 OS=Mus musculus GN=Cops3 PE=1 SV=3	113008	71253.8	118157	69677.7	94923.3	80748.3	140510	84040.4	114581	148234	62402.3	71074.2	105642	143795	107748	96388.8	119370	86013	110297	65295
O88544	7	552.38	Cops4	1.17034	0.0554828	1.09443	0.228873	0.924108	0.376416	O88544|CSN4_MOUSE COP9 signalosome complex subunit 4 OS=Mus musculus GN=Cops4 PE=1 SV=1	1.13008e+06	1.34113e+06	1.33038e+06	1.0828e+06	1.09413e+06	1.42548e+06	1.29173e+06	1.31118e+06	1.66363e+06	1.30491e+06	1.10102e+06	1.42248e+06	1.16835e+06	1.21943e+06	1.55824e+06	1.48579e+06	1.28232e+06	1.38085e+06	1.43377e+06	1.49767e+06
O35864	3	64.01	Cops5	1.17236	0.0876517	1.0632	0.152792	1.01408	0.824014	O35864|CSN5_MOUSE COP9 signalosome complex subunit 5 OS=Mus musculus GN=Cops5 PE=1 SV=3	791773	696442	775954	675947	626498	1.03216e+06	818867	700140	779701	850484	677938	708369	735904	713000	681878	851041	710518	719655	731122	727027
O88545	1	25.73	Cops6	1.16582	0.50066	0.944974	0.68716	0.932944	0.591357	O88545|CSN6_MOUSE COP9 signalosome complex subunit 6 OS=Mus musculus GN=Cops6 PE=1 SV=1	98904.4	109031	91398.3	96256.3	41639.2	126186	83065.7	46118.3	114313	140048	69998.8	104093	85923.9	111573	97066.6	94480.2	71328	70404.5	82224.6	124430
Q9CZ04	1	40	Cops7a	0.601544	0.024093	1.19547	0.197053	1.41667	0.100742	Q9CZ04|CSN7A_MOUSE COP9 signalosome complex subunit 7a OS=Mus musculus GN=Cops7a PE=1 SV=2	616311	586759	511773	695617	311173	494638	310369	272643	302664	256868	246220	389375	408472	369225	507852	407214	509806	513337	354850	511462
Q8VBV7	3	131.52	Cops8	1.28201	0.500903	0.858477	0.566066	1.15282	0.665403	Q8VBV7|CSN8_MOUSE COP9 signalosome complex subunit 8 OS=Mus musculus GN=Cops8 PE=1 SV=1	377501	729654	455684	560272	177930	1.16913e+06	494241	190334	524471	571791	184817	542843	381498	233816	653043	318054	304344	298282	326793	466063
Q3THF9	1	54.02	Coq10b	0.922236	0.729393	0.628081	0.0132324	0.853534	0.334498	Q3THF9|CQ10B_MOUSE Coenzyme Q-binding protein COQ10 homolog B, mitochondrial OS=Mus musculus GN=Coq10b PE=1 SV=1	334972	638155	374544	503350	567060	775598	473566	284693	364395	331791	410636	786932	530626	528478	576352	368255	275492	335918	369074	430629
Q8BMS4	8	428.73	Coq3	0.891355	0.0160562	0.846215	0.0115087	0.934844	0.239689	Q8BMS4|COQ3_MOUSE Ubiquinone biosynthesis O-methyltransferase, mitochondrial OS=Mus musculus GN=Coq3 PE=1 SV=1	1.42213e+07	1.37499e+07	1.19412e+07	1.34569e+07	1.39837e+07	1.22743e+07	1.22545e+07	1.10124e+07	1.19705e+07	1.25238e+07	1.50301e+07	1.47737e+07	1.24958e+07	1.59312e+07	1.38165e+07	1.22081e+07	1.12429e+07	1.20039e+07	1.21181e+07	1.33944e+07
Q9CXI0	6	347.61	Coq5	0.938153	0.446645	0.63632	0.00193449	0.856666	0.128542	Q9CXI0|COQ5_MOUSE 2-methoxy-6-polyprenyl-1,4-benzoquinol methylase, mitochondrial OS=Mus musculus GN=Coq5 PE=1 SV=2	4.47666e+06	4.72488e+06	3.69976e+06	4.67405e+06	4.01119e+06	3.39904e+06	4.96914e+06	4.26636e+06	3.79469e+06	3.82226e+06	5.17106e+06	4.8816e+06	5.53302e+06	5.80838e+06	3.80427e+06	3.09738e+06	2.60266e+06	3.01903e+06	3.48668e+06	3.82844e+06
Q8R1S0	13	793.73	Coq6	0.885393	0.0686838	0.837722	0.000859998	0.950704	0.189395	Q8R1S0|COQ6_MOUSE Ubiquinone biosynthesis monooxygenase COQ6, mitochondrial OS=Mus musculus GN=Coq6 PE=1 SV=3	1.24912e+07	1.36487e+07	1.16494e+07	1.27343e+07	1.3742e+07	1.13078e+07	1.30501e+07	9.49952e+06	1.10573e+07	1.19854e+07	1.32698e+07	1.37123e+07	1.37491e+07	1.41907e+07	1.26759e+07	1.09519e+07	1.04401e+07	1.10127e+07	1.22508e+07	1.19727e+07
P97478	8	332.22	Coq7	0.957157	0.538088	0.876576	0.146593	0.903823	0.282523	P97478|COQ7_MOUSE 5-demethoxyubiquinone hydroxylase, mitochondrial OS=Mus musculus GN=Coq7 PE=1 SV=3	5.92277e+06	5.12472e+06	5.3807e+06	5.61046e+06	6.4274e+06	6.55608e+06	5.54026e+06	4.74711e+06	5.26285e+06	5.14017e+06	7.94979e+06	6.67499e+06	5.82956e+06	5.29115e+06	5.74965e+06	5.66596e+06	5.31133e+06	5.21403e+06	5.56016e+06	5.85641e+06
Q60936	20	1204.37	Coq8a	0.97937	0.826487	0.78136	0.0233497	0.932428	0.471591	Q60936|COQ8A_MOUSE Atypical kinase COQ8A, mitochondrial OS=Mus musculus GN=Coq8a PE=1 SV=2	3.33068e+07	4.14052e+07	2.93192e+07	4.1508e+07	4.34371e+07	3.99026e+07	4.37241e+07	3.34076e+07	3.30031e+07	3.50402e+07	4.38438e+07	4.39035e+07	3.5412e+07	4.55169e+07	3.39948e+07	3.10565e+07	2.90361e+07	2.71958e+07	3.18189e+07	3.92518e+07
Q8K1Z0	21	1394.66	Coq9	0.778637	0.0038883	0.876624	0.0172689	1.0434	0.459221	Q8K1Z0|COQ9_MOUSE Ubiquinone biosynthesis protein COQ9, mitochondrial OS=Mus musculus GN=Coq9 PE=1 SV=1	1.27966e+08	1.52987e+08	1.32964e+08	1.23486e+08	1.19958e+08	1.16767e+08	1.05509e+08	9.68395e+07	9.09234e+07	1.01808e+08	1.35057e+08	1.24304e+08	1.3492e+08	1.17943e+08	1.17793e+08	1.01107e+08	1.03357e+08	1.1888e+08	1.15467e+08	1.13477e+08
O89053	2	75.26	Coro1a	1.71961	0.0342051	2.44509	0.000984949	1.12324	0.878971	O89053|COR1A_MOUSE Coronin-1A OS=Mus musculus GN=Coro1a PE=1 SV=5	159758	162363	86928.9	371834	222381	362467	232271	347567	369418	413495	163355	213440	138743	121100	256554	564690	491407	383563	304178	440094
Q9WUM3	2	85.91	Coro1b	0.944978	0.836384	0.92755	0.705512	1.00157	0.819875	Q9WUM3|COR1B_MOUSE Coronin-1B OS=Mus musculus GN=Coro1b PE=1 SV=1	121957	214646	129024	173847	149141	7249.17	145123	194595	209096	189159	62486.7	153908	188054	203699	179234	178846	112363	160914	169603	108610
Q9WUM4	2	99.78	Coro1c	1.15525	0.0550853	1.30685	0.00131054	1.29701	0.00391606	Q9WUM4|COR1C_MOUSE Coronin-1C OS=Mus musculus GN=Coro1c PE=1 SV=2	202692	162133	177819	197986	164390	237867	199238	184646	201958	221816	127135	132677	131114	142726	164124	181405	199124	187490	162927	180943
Q920M5	1	26.35	Coro6	1.23675	0.553006	0.448998	0.103508	1.19631	0.906239	Q920M5|CORO6_MOUSE Coronin-6 OS=Mus musculus GN=Coro6 PE=1 SV=1	71321.7	105885	11142.1	36670.9	60850.6	115027	51737.1	26767.1	81383	78635.1	24916	36379.9	68372.1	80882	28410.1	19372.3	9072.45	7880.77	15157.3	55809.8
Q9CQI6	1	45.66	Cotl1	2.21467	0.0504917	3.47898	3.05868e-05	1.39417	0.310505	Q9CQI6|COTL1_MOUSE Coactosin-like protein OS=Mus musculus GN=Cotl1 PE=1 SV=3	170171	89521.7	172245	313931	159701	681781	246827	194479	378625	503823	120097	181823	116562	25531.6	205526	499183	430288	384233	444595	501430
Q8K0C8	1	21.89	Cox19	0.161796	0.00421739	0.948722	0.875624	2.01904	0.133586	Q8K0C8|COX19_MOUSE Cytochrome c oxidase assembly protein COX19 OS=Mus musculus GN=Cox19 PE=3 SV=1	26689.8	68401.7	83189.5	119866	65896.8	0	12036.5	20386.9	9166.16	17311.4	64717.7	52336.5	31134.1	3935.68	28181	29902.8	39478.6	29321.3	49141.5	23215.2
Q9D7J4	2	112.43	Cox20	0.798542	0.512299	0.969718	0.86755	1.14185	0.841532	Q9D7J4|COX20_MOUSE Cytochrome c oxidase protein 20 homolog OS=Mus musculus GN=Cox20 PE=1 SV=1	625257	1.51883e+06	376392	1.25803e+06	1.29413e+06	371952	1.29165e+06	1.30518e+06	461337	620591	905603	1.0612e+06	725601	1.27995e+06	470108	866894	1.04805e+06	689975	712195	990818
P19783	15	826.35	Cox4i1	1.10602	0.054896	0.894312	0.0414475	0.88162	0.0195269	P19783|COX41_MOUSE Cytochrome c oxidase subunit 4 isoform 1, mitochondrial OS=Mus musculus GN=Cox4i1 PE=1 SV=2	5.16518e+08	5.57239e+08	5.1643e+08	5.40917e+08	4.97865e+08	5.93417e+08	6.55047e+08	5.2023e+08	5.86146e+08	5.52854e+08	5.63385e+08	5.45066e+08	6.76493e+08	6.13199e+08	5.83832e+08	5.05072e+08	5.07515e+08	5.48485e+08	5.68043e+08	5.37699e+08
P12787	10	765.39	Cox5a	0.86125	0.0565875	0.822084	0.0106055	0.969344	0.638393	P12787|COX5A_MOUSE Cytochrome c oxidase subunit 5A, mitochondrial OS=Mus musculus GN=Cox5a PE=1 SV=2	3.87493e+08	3.63451e+08	4.01359e+08	4.5714e+08	3.36839e+08	3.57405e+08	3.22951e+08	3.75546e+08	3.16128e+08	3.04206e+08	4.48491e+08	4.19527e+08	3.64223e+08	3.59158e+08	4.16436e+08	2.95421e+08	3.07797e+08	3.2985e+08	3.59867e+08	3.57674e+08
P19536	9	449.05	Cox5b	0.762758	0.040591	0.942043	0.510162	1.0956	0.403949	P19536|COX5B_MOUSE Cytochrome c oxidase subunit 5B, mitochondrial OS=Mus musculus GN=Cox5b PE=1 SV=1	1.59725e+08	1.82133e+08	1.96361e+08	2.28596e+08	1.45547e+08	1.66425e+08	1.29736e+08	1.60648e+08	1.2363e+08	1.15471e+08	1.9549e+08	1.79333e+08	1.41851e+08	1.58801e+08	1.57273e+08	1.29633e+08	1.76582e+08	1.53483e+08	1.84332e+08	1.40455e+08
P43024	1	31.4	Cox6a1	2.13502	0.105183	0.775627	0.481903	0.618524	0.109123	P43024|CX6A1_MOUSE Cytochrome c oxidase subunit 6A1, mitochondrial OS=Mus musculus GN=Cox6a1 PE=1 SV=2	132640	202592	272393	452094	77321.9	29895.8	738177	432050	552274	675211	256359	506171	247133	347133	481517	151426	14736.6	288755	386726	584203
P43023	4	145.82	Cox6a2	1.53254	0.0390326	0.645838	0.00903873	0.685245	0.00660441	P43023|CX6A2_MOUSE Cytochrome c oxidase subunit 6A2, mitochondrial OS=Mus musculus GN=Cox6a2 PE=1 SV=2	1.46288e+07	2.0486e+07	1.42935e+07	1.78233e+07	1.92774e+07	3.74715e+07	3.10488e+07	2.05806e+07	1.8027e+07	2.54503e+07	2.2522e+07	2.74527e+07	2.17835e+07	3.19532e+07	2.25339e+07	1.36019e+07	1.42906e+07	1.34402e+07	1.77098e+07	2.24916e+07
P56391	10	433.09	Cox6b1	0.720667	0.0240724	0.937948	0.4623	1.08293	0.521248	P56391|CX6B1_MOUSE Cytochrome c oxidase subunit 6B1 OS=Mus musculus GN=Cox6b1 PE=1 SV=2	1.75737e+08	2.40031e+08	2.34068e+08	2.94262e+08	1.94007e+08	1.92601e+08	1.62961e+08	1.70907e+08	1.29842e+08	1.63884e+08	2.44392e+08	2.09391e+08	2.09965e+08	2.06248e+08	1.80956e+08	1.71268e+08	2.26588e+08	1.76476e+08	2.3361e+08	1.77797e+08
Q9CPQ1	4	115.36	Cox6c	0.949096	0.257777	0.914529	0.309215	0.944872	0.536704	Q9CPQ1|COX6C_MOUSE Cytochrome c oxidase subunit 6C OS=Mus musculus GN=Cox6c PE=1 SV=3	2.23591e+08	2.1233e+08	2.02335e+08	2.20431e+08	2.04499e+08	1.78039e+08	2.25884e+08	1.96764e+08	2.08874e+08	1.99506e+08	2.51673e+08	2.09995e+08	2.3636e+08	2.53774e+08	1.73416e+08	1.7938e+08	2.21429e+08	2.27481e+08	2.1158e+08	1.89176e+08
P56392	5	278.12	Cox7a1	1.17278	0.120158	0.798053	0.0180264	0.83748	0.0495851	P56392|CX7A1_MOUSE Cytochrome c oxidase subunit 7A1, mitochondrial OS=Mus musculus GN=Cox7a1 PE=1 SV=1	9.6082e+07	1.15942e+08	1.06706e+08	1.11244e+08	8.79146e+07	1.43698e+08	1.37571e+08	9.36709e+07	1.13683e+08	1.18744e+08	1.23399e+08	1.14576e+08	1.10137e+08	1.52245e+08	1.18031e+08	8.82199e+07	9.67481e+07	9.33114e+07	1.09023e+08	1.06205e+08
P48771	4	244.42	Cox7a2	1.09773	0.216144	0.857239	0.00251938	0.93407	0.116479	P48771|CX7A2_MOUSE Cytochrome c oxidase subunit 7A2, mitochondrial OS=Mus musculus GN=Cox7a2 PE=1 SV=2	3.08476e+07	3.70647e+07	3.36686e+07	3.44069e+07	3.10283e+07	4.10982e+07	4.21048e+07	3.11514e+07	3.55966e+07	3.33877e+07	3.67589e+07	3.76357e+07	3.41031e+07	3.61786e+07	3.41284e+07	2.72127e+07	3.09871e+07	3.13109e+07	3.29615e+07	3.08062e+07
P56393	2	45.01	Cox7b	1.06372	0.250761	0.820904	0.00424483	0.949613	0.42208	P56393|COX7B_MOUSE Cytochrome c oxidase subunit 7B, mitochondrial OS=Mus musculus GN=Cox7b PE=3 SV=1	1.53546e+07	1.32932e+07	1.38912e+07	1.52467e+07	1.23816e+07	1.4199e+07	1.62924e+07	1.39574e+07	1.45815e+07	1.56079e+07	1.65835e+07	1.43053e+07	1.46101e+07	1.5642e+07	1.27494e+07	1.1937e+07	1.24918e+07	1.16628e+07	1.19829e+07	1.25824e+07
P17665	1	50.61	Cox7c	1.41696	0.383755	1.08917	0.816214	0.727992	0.452246	P17665|COX7C_MOUSE Cytochrome c oxidase subunit 7C, mitochondrial OS=Mus musculus GN=Cox7c PE=1 SV=1	1.07794e+07	1.59538e+06	3.78074e+06	2.23378e+06	2.41558e+06	8.10606e+06	6.22834e+06	5.81113e+06	6.33884e+06	2.99545e+06	1.3585e+07	4.3713e+06	4.57713e+06	4.15797e+06	1.88706e+06	8.28255e+06	6.56729e+06	5.58546e+06	6.24392e+06	4.44751e+06
Q61147	24	945.77	Cp	1.34427	0.0261041	1.58288	0.00228291	1.11468	0.440291	Q61147|CERU_MOUSE Ceruloplasmin OS=Mus musculus GN=Cp PE=1 SV=2	1.11067e+07	9.23972e+06	1.13767e+07	7.08955e+06	7.37357e+06	1.41124e+07	1.28894e+07	9.6321e+06	1.29068e+07	1.25463e+07	7.02258e+06	7.51834e+06	7.4462e+06	8.92631e+06	1.05212e+07	1.1331e+07	1.41166e+07	1.56211e+07	1.3648e+07	1.08695e+07
P15089	2	66.03	Cpa3	0.108636	0.0012127	0.482009	0.215502	1.63822	0.109399	P15089|CBPA3_MOUSE Mast cell carboxypeptidase A OS=Mus musculus GN=Cpa3 PE=2 SV=1	320382	263386	493986	389567	148615	6191.71	63603.9	42876.3	24111.1	38765.4	121415	230057	313150	146479	175296	49854.1	25268.8	23003.3	11890.1	365436
Q9DBB9	2	47.65	Cpn2	1.41311	0.0153793	1.55166	0.0264537	0.999646	0.840404	Q9DBB9|CPN2_MOUSE Carboxypeptidase N subunit 2 OS=Mus musculus GN=Cpn2 PE=1 SV=2	237725	283976	248136	179600	243565	357625	312548	271679	432156	311828	192978	196805	180132	231082	392426	331272	406617	449292	377615	286988
Q8C166	1	65.02	Cpne1	0.884019	0.143596	1.03441	0.834223	1.01776	0.808475	Q8C166|CPNE1_MOUSE Copine-1 OS=Mus musculus GN=Cpne1 PE=1 SV=1	102810	131712	103614	138725	125948	107035	104051	108333	92735.4	120741	82158.6	106648	149730	123387	130367	133745	170258	127350	85773.6	95546
Q0VE82;P59108	1	42.09	Cpne7	1.15935	0.716498	0.652242	0.117563	0.650514	0.0541475	Q0VE82|CPNE7_MOUSE Copine-7 OS=Mus musculus GN=Cpne7 PE=1 SV=1	47182.5	26192	21825.6	53068.9	64316.7	23831.1	32824	108740	23581.2	57486.4	56603	82884.3	70728.9	56876.1	59704.2	87223.3	33815.1	38595.1	38084.2	15432.6
P36552	6	350.51	Cpox	1.12021	0.266771	0.888384	0.0674846	0.812527	0.00456521	P36552|HEM6_MOUSE Oxygen-dependent coproporphyrinogen-III oxidase, mitochondrial OS=Mus musculus GN=Cpox PE=1 SV=2	901727	1.14633e+06	951040	1.0625e+06	1.14255e+06	965987	1.40373e+06	1.16543e+06	956091	1.33847e+06	1.21672e+06	1.20005e+06	1.33318e+06	1.30395e+06	1.35098e+06	1.27847e+06	1.12977e+06	1.21295e+06	1.14799e+06	920823
Q8BFS6	3	114.91	Cpped1	1.10413	0.194428	1.2651	5.35858e-05	1.01504	0.698682	Q8BFS6|CPPED_MOUSE Serine/threonine-protein phosphatase CPPED1 OS=Mus musculus GN=Cpped1 PE=1 SV=1	1.173e+06	1.30519e+06	1.11964e+06	1.19982e+06	1.137e+06	1.08473e+06	1.14876e+06	1.39039e+06	1.4583e+06	1.47044e+06	1.112e+06	1.16325e+06	1.2343e+06	1.23632e+06	1.10087e+06	1.52329e+06	1.51252e+06	1.38051e+06	1.52212e+06	1.45829e+06
Q924X2;P97742;P97789;Q8BGD5	22	1145.37	Cpt1b	1.02322	0.925352	0.963367	0.839701	1.06579	0.80442	Q924X2|CPT1B_MOUSE Carnitine O-palmitoyltransferase 1, muscle isoform OS=Mus musculus GN=Cpt1b PE=1 SV=1	5.15013e+07	5.54324e+07	3.70924e+07	2.46587e+07	2.60764e+07	3.48164e+07	6.2243e+07	3.39338e+07	2.14983e+07	4.67912e+07	1.7767e+07	3.56793e+07	4.80404e+07	3.72945e+07	4.39575e+07	2.48897e+07	3.08295e+07	3.32496e+07	4.59655e+07	4.11101e+07
P52825	38	2320.6	Cpt2	1.0636	0.448529	0.711322	4.31946e-05	0.848644	0.00468572	P52825|CPT2_MOUSE Carnitine O-palmitoyltransferase 2, mitochondrial OS=Mus musculus GN=Cpt2 PE=1 SV=2	1.37698e+08	1.12185e+08	1.2311e+08	1.18839e+08	1.17958e+08	1.42658e+08	1.54562e+08	1.06305e+08	1.1587e+08	1.29181e+08	1.46232e+08	1.39861e+08	1.43859e+08	1.55318e+08	1.33276e+08	1.01708e+08	9.06591e+07	9.87752e+07	1.08419e+08	1.11556e+08
P47934	28	1397.48	Crat	0.861879	0.0390294	0.717253	0.000395343	0.887812	0.0811369	P47934|CACP_MOUSE Carnitine O-acetyltransferase OS=Mus musculus GN=Crat PE=1 SV=3	1.27794e+08	1.11016e+08	1.2888e+08	1.15024e+08	1.14393e+08	1.01521e+08	1.247e+08	9.81733e+07	9.55066e+07	9.47318e+07	1.35621e+08	1.36823e+08	1.47722e+08	1.41502e+08	1.10891e+08	9.54287e+07	9.04847e+07	9.9152e+07	9.62155e+07	1.01114e+08
Q9DCT8	5	414.17	Crip2	0.896995	0.19316	1.06038	0.473565	1.07044	0.440508	Q9DCT8|CRIP2_MOUSE Cysteine-rich protein 2 OS=Mus musculus GN=Crip2 PE=1 SV=1	4.98063e+07	5.99254e+07	4.66474e+07	6.32933e+07	5.52299e+07	5.33195e+07	4.26111e+07	5.42944e+07	5.26295e+07	4.37315e+07	6.07834e+07	5.8752e+07	4.55432e+07	4.69959e+07	4.47386e+07	5.32332e+07	4.8594e+07	5.15768e+07	6.11496e+07	5.7765e+07
Q64010	3	226.11	Crk	0.774545	0.0229951	1.17173	0.124267	1.12535	0.219542	Q64010|CRK_MOUSE Adapter molecule crk OS=Mus musculus GN=Crk PE=1 SV=1	1.37695e+06	1.68531e+06	1.83286e+06	1.8566e+06	1.40417e+06	1.34346e+06	1.16304e+06	1.52101e+06	1.03979e+06	1.24979e+06	1.62465e+06	1.44493e+06	1.2237e+06	1.29458e+06	1.65957e+06	2.13642e+06	1.67609e+06	1.56541e+06	1.65813e+06	1.45599e+06
P47941	3	114.22	Crkl	0.832183	0.311896	1.27999	0.0457035	1.21568	0.304971	P47941|CRKL_MOUSE Crk-like protein OS=Mus musculus GN=Crkl PE=1 SV=2	330964	557482	375068	682861	426402	522356	318035	335880	391896	406415	377168	464410	310300	315815	484116	502198	599896	449344	438853	507998
P23927	14	906.35	Cryab	0.765165	0.0207643	1.05324	0.413467	1.24584	0.0315591	P23927|CRYAB_MOUSE Alpha-crystallin B chain OS=Mus musculus GN=Cryab PE=1 SV=2	2.94246e+08	3.59403e+08	3.75239e+08	3.63611e+08	2.79138e+08	3.29143e+08	2.25404e+08	2.2971e+08	2.4529e+08	2.49531e+08	2.84495e+08	2.74279e+08	2.42017e+08	2.26611e+08	3.14371e+08	2.87537e+08	2.9816e+08	2.88332e+08	2.6986e+08	2.69324e+08
P47199	3	124.5	Cryz	1.41081	0.00247493	1.05246	0.574071	0.784412	0.076433	P47199|QOR_MOUSE Quinone oxidoreductase OS=Mus musculus GN=Cryz PE=1 SV=1	559454	414615	660572	494252	656599	812633	705665	762400	820510	828593	768170	710913	578321	596065	897589	719179	804188	793879	748712	671381
Q9CZU6	38	2390.54	Cs	1.10093	0.13392	0.812918	0.0195535	0.903308	0.169964	Q9CZU6|CISY_MOUSE Citrate synthase, mitochondrial OS=Mus musculus GN=Cs PE=1 SV=1	7.72527e+08	7.14718e+08	7.21958e+08	7.07459e+08	6.40883e+08	8.77009e+08	8.37907e+08	6.55908e+08	7.76671e+08	7.69122e+08	7.58588e+08	6.49891e+08	8.70866e+08	8.93393e+08	7.65614e+08	5.89393e+08	5.6991e+08	6.92885e+08	6.83448e+08	6.65922e+08
Q60737	2	60.62	Csnk2a1	0.987875	0.957634	1.24714	0.179541	1.22088	0.345552	Q60737|CSK21_MOUSE Casein kinase II subunit alpha OS=Mus musculus GN=Csnk2a1 PE=1 SV=2	235341	121046	173563	281085	160690	104475	137473	287124	220204	210666	169816	182374	181854	141845	120033	156113	226616	262439	215011	132450
P67871	1	77.96	Csnk2b	0.903345	0.660273	1.68581	0.00209839	1.3373	0.110389	P67871|CSK2B_MOUSE Casein kinase II subunit beta OS=Mus musculus GN=Csnk2b PE=1 SV=1	229887	258908	150903	218527	235372	362859	148921	121671	180967	173476	199000	221317	117303	102501	177640	273487	290580	247437	303766	263322
Q8VHY0	1	35.06	Cspg4	0.889487	0.510302	0.753983	0.402523	0.72395	0.28793	Q8VHY0|CSPG4_MOUSE Chondroitin sulfate proteoglycan 4 OS=Mus musculus GN=Cspg4 PE=1 SV=3	46748.2	23844	40571.1	41166	43562.6	19870.9	35362.8	35755.4	50427.6	32826.5	32453.8	73450.5	34796.4	42348.7	87538.1	36418.1	21142.5	79508.7	28262.6	38686.6
P97315	5	280.72	Csrp1	0.886058	0.291773	1.63708	0.0069816	1.16402	0.205432	P97315|CSRP1_MOUSE Cysteine and glycine-rich protein 1 OS=Mus musculus GN=Csrp1 PE=1 SV=3	3.62167e+06	3.69394e+06	3.30812e+06	5.14417e+06	3.06564e+06	3.3251e+06	3.28772e+06	3.73419e+06	3.32981e+06	3.01079e+06	3.22408e+06	3.59851e+06	2.98305e+06	2.78949e+06	3.58458e+06	6.00986e+06	6.86876e+06	4.87744e+06	5.12489e+06	3.60652e+06
P97314	1	29.24	Csrp2	0.666037	0.334167	4.45101	0.00230431	2.05038	0.252979	P97314|CSRP2_MOUSE Cysteine and glycine-rich protein 2 OS=Mus musculus GN=Csrp2 PE=1 SV=3	35522.7	5601.55	34543.6	28431.3	25930.5	2374.48	2295.61	29714.6	32647.6	19572.3	18435.2	16358.6	9967.39	29.3283	18626.7	75382.3	72347.2	65956	39367.6	29217.3
P50462	12	952.97	Csrp3	0.603368	0.000275136	0.943872	0.570853	1.21179	0.0946232	P50462|CSRP3_MOUSE Cysteine and glycine-rich protein 3 OS=Mus musculus GN=Csrp3 PE=1 SV=1	2.79215e+08	3.41912e+08	2.61204e+08	3.63241e+08	3.26738e+08	1.74536e+08	1.72717e+08	2.0035e+08	2.02423e+08	1.98656e+08	3.2141e+08	3.05861e+08	2.32706e+08	2.23012e+08	2.14524e+08	2.45861e+08	2.40824e+08	2.09456e+08	2.58352e+08	2.70193e+08
P21460	1	73.46	Cst3	0.478894	0.00576309	2.15895	0.016248	1.7682	0.000235041	P21460|CYTC_MOUSE Cystatin-C OS=Mus musculus GN=Cst3 PE=1 SV=2	590786	645308	817167	777664	644154	24020.3	309623	421656	361674	547222	347599	400322	484110	330842	402447	1.23441e+06	1.15828e+06	756465	576120	517742
O88712;P56546	6	304.6	Ctbp1	1.0628	0.296261	1.03281	0.674745	0.877352	0.0311431	O88712|CTBP1_MOUSE C-terminal-binding protein 1 OS=Mus musculus GN=Ctbp1 PE=1 SV=2	1.36225e+06	1.33317e+06	1.42507e+06	1.47009e+06	1.57984e+06	1.58378e+06	1.50634e+06	1.5497e+06	1.69683e+06	1.28409e+06	1.52574e+06	1.71263e+06	1.66049e+06	1.81608e+06	1.45783e+06	2.06213e+06	1.67556e+06	1.5183e+06	1.7215e+06	1.46341e+06
P26231	15	1048.55	Ctnna1	1.19717	0.026662	0.847018	0.210875	0.974866	0.81698	P26231|CTNA1_MOUSE Catenin alpha-1 OS=Mus musculus GN=Ctnna1 PE=1 SV=1	7.12678e+06	7.43593e+06	6.4698e+06	6.80339e+06	7.95157e+06	9.80577e+06	8.7312e+06	7.01372e+06	8.90155e+06	8.39154e+06	6.00152e+06	7.18607e+06	8.35307e+06	8.6039e+06	6.56559e+06	6.94255e+06	4.27438e+06	6.37309e+06	8.11279e+06	5.39137e+06
Q65CL1	8	372.09	Ctnna3	2.08041	0.000170104	0.614038	0.160871	0.642745	0.288704	Q65CL1|CTNA3_MOUSE Catenin alpha-3 OS=Mus musculus GN=Ctnna3 PE=1 SV=2	1.05855e+06	858948	1.01808e+06	668457	651530	1.93124e+06	1.93339e+06	1.36369e+06	1.92009e+06	1.70491e+06	491045	808925	1.96821e+06	2.0306e+06	1.32216e+06	577240	454130	970969	1.10095e+06	962210
Q02248	9	474.83	Ctnnb1	1.1872	0.106341	0.919541	0.639851	1.19247	0.243191	Q02248|CTNB1_MOUSE Catenin beta-1 OS=Mus musculus GN=Ctnnb1 PE=1 SV=1	2.79418e+06	2.66086e+06	1.61922e+06	2.2426e+06	2.49232e+06	2.62836e+06	2.70331e+06	2.49683e+06	3.18651e+06	3.0049e+06	1.89002e+06	1.70151e+06	2.20175e+06	2.66711e+06	1.44275e+06	2.27862e+06	1.05094e+06	2.06329e+06	2.29787e+06	1.41562e+06
P30999	1	38.35	Ctnnd1	0.701176	0.178152	2.06299	0.00185619	1.75423	0.0249723	P30999|CTND1_MOUSE Catenin delta-1 OS=Mus musculus GN=Ctnnd1 PE=1 SV=2	55494.4	42621.5	39185.2	65633	81697.6	10635	56519.7	32811.3	44057.1	55553.9	48765.5	35788.3	29264.8	30007.2	18428.6	86817.2	70953.8	53861.1	64316.6	58780.3
P70698	1	66.87	Ctps1	1.38852	0.384276	0.951027	0.950403	2.59252	0.22958	P70698|PYRG1_MOUSE CTP synthase 1 OS=Mus musculus GN=Ctps1 PE=1 SV=2	12043.5	0	12374.4	23943.8	8475.39	17396.2	23736.2	6031.47	16954.9	14801	0	11739.6	0	0	10183.9	0	3379.99	7893.3	9576.57	0
P16675	2	125.1	Ctsa	1.14464	0.181159	1.32773	0.132844	1.0041	0.960649	P16675|PPGB_MOUSE Lysosomal protective protein OS=Mus musculus GN=Ctsa PE=1 SV=1	355490	438440	506758	543069	397359	611305	483658	443571	521460	505272	361000	590886	431486	418206	430391	707068	845301	476199	496072	438820
P10605	7	433.81	Ctsb	0.984465	0.840487	1.08879	0.153639	1.07592	0.188036	P10605|CATB_MOUSE Cathepsin B OS=Mus musculus GN=Ctsb PE=1 SV=2	8.41041e+06	1.02474e+07	9.44997e+06	9.37384e+06	8.79942e+06	1.12414e+07	7.82611e+06	8.26558e+06	8.52122e+06	9.7077e+06	9.4651e+06	8.73861e+06	8.97327e+06	7.53108e+06	8.30718e+06	1.0168e+07	1.00563e+07	9.00999e+06	9.3809e+06	8.21921e+06
P18242	15	658.82	Ctsd	1.0914	0.245416	1.14142	0.00827042	1.10239	0.044464	P18242|CATD_MOUSE Cathepsin D OS=Mus musculus GN=Ctsd PE=1 SV=1	3.4597e+07	3.72458e+07	3.49584e+07	3.61292e+07	3.2098e+07	4.67013e+07	3.27128e+07	3.59642e+07	3.97923e+07	3.58561e+07	3.31609e+07	3.24934e+07	3.43045e+07	2.8632e+07	3.0181e+07	3.3479e+07	3.81479e+07	3.69908e+07	3.65685e+07	3.60392e+07
Q9JIA9	1	23.84	Ctsr	0.967853	0.572851	0.770996	0.0328024	0.813808	0.038076	Q9JIA9|CATR_MOUSE Cathepsin R OS=Mus musculus GN=Ctsr PE=2 SV=1	1.22119e+07	1.15143e+07	1.21221e+07	1.14115e+07	1.03327e+07	1.15777e+07	1.28795e+07	9.64865e+06	1.09263e+07	1.0709e+07	1.38201e+07	1.13237e+07	1.49233e+07	1.76573e+07	1.30449e+07	1.01805e+07	1.3252e+07	1.16823e+07	9.80402e+06	9.64409e+06
Q9WUU7	2	63.4	Ctsz	1.49045	0.110402	2.25978	0.000556196	1.25205	0.287124	Q9WUU7|CATZ_MOUSE Cathepsin Z OS=Mus musculus GN=Ctsz PE=1 SV=1	109631	173088	235554	231832	140761	416991	160171	235242	254035	261356	153617	125743	135786	103493	192886	430675	325023	267982	289521	294693
Q60598	4	125.62	Cttn	0.912012	0.677894	1.15397	0.237774	1.05498	0.923881	Q60598|SRC8_MOUSE Src substrate cortactin OS=Mus musculus GN=Cttn PE=1 SV=2	182357	342028	154573	294187	365631	225257	212031	376677	175012	232003	301450	327683	248591	204901	186377	337299	313104	267408	261736	284837
Q9WTX6	1	17.62	Cul1	1.02416	0.961602	1.02148	0.95565	0.700216	0.395514	Q9WTX6|CUL1_MOUSE Cullin-1 OS=Mus musculus GN=Cul1 PE=1 SV=1	5695.11	13412	0	6036.35	16704.8	5518.91	6657.95	19615.2	6098.09	4969.38	16081.8	1016.31	21352.6	12374	8940.22	15733.4	18761.1	1811.16	13532.6	11210.5
Q9D4H8	1	14.9	Cul2	1.55377	0.123923	0.897813	0.633833	0.749085	0.255947	Q9D4H8|CUL2_MOUSE Cullin-2 OS=Mus musculus GN=Cul2 PE=1 SV=2	49317.9	16029.1	45065.5	17650.9	56208	43555	89691.1	50017.9	45987.8	57063.8	42315.1	37098.9	50423.2	79810.4	36347.7	43053.7	57511.9	22687	55166.5	42438.7
Q9D5V5	6	196.02	Cul5	0.998696	0.990155	1.15224	0.221471	1.11721	0.445651	Q9D5V5|CUL5_MOUSE Cullin-5 OS=Mus musculus GN=Cul5 PE=1 SV=3	581489	832558	741773	705311	467921	618041	659102	656235	634618	756713	509753	706440	487781	721665	554142	613299	594305	839858	753339	632610
Q9CQ89	1	48.29	Cuta	0.634962	0.0280636	1.36853	0.106123	1.05389	0.66025	Q9CQ89|CUTA_MOUSE Protein CutA OS=Mus musculus GN=Cuta PE=1 SV=3	273387	245892	391598	361444	425611	182656	109712	246008	273970	265776	392548	350660	225782	165173	476948	482637	483545	497186	419917	321570
Q9D8X1	1	27.2	Cutc	1.25201	0.449496	0.596216	0.20959	0.603579	0.341022	Q9D8X1|CUTC_MOUSE Copper homeostasis protein cutC homolog OS=Mus musculus GN=Cutc PE=1 SV=1	82605.7	129331	37834	43665.9	30812.3	67487.9	100884	105381	62684.5	69525.1	20178.3	143227	111684	127057	135064	21507	35610	29858.9	96203.1	137114
P56395	4	254.03	Cyb5a	0.797278	0.0395429	1.22219	0.013167	1.1793	0.0546659	P56395|CYB5_MOUSE Cytochrome b5 OS=Mus musculus GN=Cyb5a PE=1 SV=2	7.62776e+06	1.00415e+07	7.89611e+06	8.02734e+06	6.67002e+06	7.76126e+06	6.19903e+06	6.33445e+06	6.33331e+06	5.47255e+06	6.54083e+06	6.83669e+06	7.21089e+06	6.42397e+06	7.12871e+06	7.73018e+06	9.77829e+06	9.04114e+06	7.71735e+06	7.45991e+06
Q9CQX2	3	178.59	Cyb5b	1.01633	0.927407	1.65182	0.00483376	1.61685	0.023806	Q9CQX2|CYB5B_MOUSE Cytochrome b5 type B OS=Mus musculus GN=Cyb5b PE=1 SV=1	2.35202e+06	3.44992e+06	2.38514e+06	1.89856e+06	1.64023e+06	1.63089e+06	3.15504e+06	2.51179e+06	1.98435e+06	2.6353e+06	1.09967e+06	1.49755e+06	1.85313e+06	1.06438e+06	1.73757e+06	1.7442e+06	2.73754e+06	2.76796e+06	2.39132e+06	2.33846e+06
Q9DCN2	3	62.48	Cyb5r3	1.11347	0.285585	0.953567	0.638308	1.11129	0.309154	Q9DCN2|NB5R3_MOUSE NADH-cytochrome b5 reductase 3 OS=Mus musculus GN=Cyb5r3 PE=1 SV=3	4.98416e+06	4.44126e+06	4.22378e+06	3.66734e+06	3.79042e+06	5.44163e+06	4.85624e+06	4.44794e+06	3.50155e+06	5.25467e+06	2.89736e+06	3.27194e+06	3.71229e+06	4.28326e+06	4.82829e+06	3.26653e+06	3.69689e+06	3.68154e+06	3.89909e+06	3.56717e+06
Q9D0M3	21	1432.26	Cyc1	1.11738	0.204198	0.750816	0.000726133	0.928317	0.0938724	Q9D0M3|CY1_MOUSE Cytochrome c1, heme protein, mitochondrial OS=Mus musculus GN=Cyc1 PE=1 SV=1	2.54932e+08	2.54725e+08	2.55107e+08	2.37466e+08	2.48983e+08	2.93425e+08	3.38558e+08	2.08009e+08	2.77354e+08	2.80737e+08	2.59489e+08	2.39641e+08	2.88696e+08	2.89602e+08	2.70401e+08	2.06658e+08	1.68832e+08	2.09183e+08	2.13943e+08	2.13356e+08
P62897;P00015	13	1048.15	Cycs	0.9714	0.617488	0.789544	0.00281756	0.954365	0.287744	P62897|CYC_MOUSE Cytochrome c, somatic OS=Mus musculus GN=Cycs PE=1 SV=2	2.15202e+08	2.08835e+08	2.49076e+08	2.31358e+08	2.16251e+08	2.55315e+08	2.12986e+08	1.98092e+08	2.04521e+08	2.17757e+08	2.2574e+08	2.28555e+08	2.39124e+08	2.22702e+08	2.58192e+08	2.21069e+08	1.71499e+08	1.75321e+08	1.90702e+08	1.68581e+08
Q9CX80	2	82.36	Cygb	1.27826	0.541786	0.790475	0.102478	0.779782	0.0850502	Q9CX80|CYGB_MOUSE Cytoglobin OS=Mus musculus GN=Cygb PE=1 SV=1	267913	254009	361259	343415	332289	931234	252004	223390	251705	334331	312745	377502	345398	405555	557928	345031	302459	319676	261797	351297
Q9QZ82	1	19.11	Cyp11a1	0.482684	0.205489	2.53148	0.0124733	1.71029	0.412907	Q9QZ82|CP11A_MOUSE Cholesterol side-chain cleavage enzyme, mitochondrial OS=Mus musculus GN=Cyp11a1 PE=1 SV=1	63457	792534	332824	386598	188969	70950	141912	304089	75477.2	259211	106770	483114	132327	79536.5	229877	593641	609617	649405	468316	290564
Q6VVW9	1	16.82	Cyp2r1	1.50037	0.0109695	0.830226	0.323482	0.778531	0.177748	Q6VVW9|CP2R1_MOUSE Vitamin D 25-hydroxylase OS=Mus musculus GN=Cyp2r1 PE=1 SV=1	2.52752e+06	4.32797e+06	3.88427e+06	4.1324e+06	4.19362e+06	4.35951e+06	6.27271e+06	7.08421e+06	5.87739e+06	5.01184e+06	5.06011e+06	4.29239e+06	4.60955e+06	3.33434e+06	7.19305e+06	4.88893e+06	3.84935e+06	4.03958e+06	2.47076e+06	5.08313e+06
Q9D172	15	1078.44	D10Jhu81e	0.98227	0.625967	0.974314	0.750474	0.919748	0.384416	Q9D172|ES1_MOUSE ES1 protein homolog, mitochondrial OS=Mus musculus GN=D10Jhu81e PE=1 SV=1	1.6402e+08	1.75236e+08	1.6854e+08	1.91569e+08	1.79307e+08	1.71612e+08	1.73137e+08	1.8599e+08	1.70662e+08	1.61693e+08	2.14694e+08	2.27241e+08	1.78571e+08	1.87227e+08	1.47606e+08	1.85727e+08	1.79016e+08	1.72791e+08	1.90721e+08	2.02546e+08
Q62165	7	400.28	Dag1	0.886628	0.22279	1.04776	0.444012	0.981198	0.795595	Q62165|DAG1_MOUSE Dystroglycan OS=Mus musculus GN=Dag1 PE=1 SV=4	6.96629e+06	8.30743e+06	6.97608e+06	8.05086e+06	7.85419e+06	8.53332e+06	4.97882e+06	7.44628e+06	6.34883e+06	6.5219e+06	8.38047e+06	8.50078e+06	7.11325e+06	6.62656e+06	8.26493e+06	8.18727e+06	8.4438e+06	8.94668e+06	7.6022e+06	7.56329e+06
Q9ER88	5	197.45	Dap3	1.05846	0.606285	0.910151	0.407543	0.873377	0.224888	Q9ER88|RT29_MOUSE 28S ribosomal protein S29, mitochondrial OS=Mus musculus GN=Dap3 PE=1 SV=1	424003	523165	485740	516506	655924	402538	638367	536559	553442	626739	721245	538812	565321	675567	482115	709868	472638	506680	505905	519944
Q922B2	9	432.55	Dars	1.20524	0.0057768	1.05535	0.178866	0.957013	0.236332	Q922B2|SYDC_MOUSE Aspartate--tRNA ligase, cytoplasmic OS=Mus musculus GN=Dars PE=1 SV=2	4.63683e+06	4.40584e+06	4.60605e+06	4.08821e+06	4.31347e+06	4.86936e+06	5.26889e+06	4.89792e+06	5.46542e+06	6.07447e+06	4.89244e+06	4.2838e+06	4.73236e+06	4.73983e+06	4.39243e+06	5.04646e+06	4.4485e+06	4.99735e+06	4.68203e+06	5.1418e+06
P31786	1	123.96	Dbi	0.481497	0.00908423	0.981786	0.912337	1.67816	0.038899	P31786|ACBP_MOUSE Acyl-CoA-binding protein OS=Mus musculus GN=Dbi PE=1 SV=2	1.20527e+07	1.67496e+07	1.72917e+07	2.00987e+07	8.09155e+06	9.74484e+06	5.77039e+06	7.81894e+06	6.27063e+06	6.16282e+06	7.93072e+06	1.14824e+07	7.02305e+06	6.50769e+06	1.13214e+07	5.85725e+06	9.31923e+06	8.52357e+06	1.16536e+07	8.10538e+06
P53395	12	754.55	Dbt	0.85693	0.0031671	0.766823	0.00232786	0.943381	0.329618	P53395|ODB2_MOUSE Lipoamide acyltransferase component of branched-chain alpha-keto acid dehydrogenase complex, mitochondrial OS=Mus musculus GN=Dbt PE=1 SV=2	2.9097e+07	2.77148e+07	2.82186e+07	2.63073e+07	2.56249e+07	2.49075e+07	2.47114e+07	2.11554e+07	2.26902e+07	2.39029e+07	3.14597e+07	2.73203e+07	3.23302e+07	2.91697e+07	2.49028e+07	2.31656e+07	1.97909e+07	2.13905e+07	2.37828e+07	2.31998e+07
P28654	12	795.4	Dcn	0.897279	0.33133	1.2523	0.100892	1.03797	0.625852	P28654|PGS2_MOUSE Decorin OS=Mus musculus GN=Dcn PE=1 SV=1	2.33891e+07	2.38631e+07	2.73417e+07	2.45174e+07	2.00731e+07	2.58312e+07	2.05101e+07	2.64969e+07	1.76808e+07	1.64225e+07	2.16746e+07	2.64737e+07	2.2451e+07	1.8876e+07	2.53494e+07	2.51814e+07	3.91189e+07	2.62948e+07	2.31929e+07	3.00072e+07
Q9DAR7	1	45.88	Dcps	2.45103	0.232426	2.64622	0.0191545	0.67421	0.233002	Q9DAR7|DCPS_MOUSE m7GpppX diphosphatase OS=Mus musculus GN=Dcps PE=1 SV=1	10804.4	11006.2	5351.44	15252.1	9027.15	2358.9	3875.69	65592.8	25843.4	28413.1	0	22201.5	38329.8	0	15767.3	41025.3	31497.9	57819.7	37079.4	34480.5
O08788	5	186.7	Dctn1	1.15899	0.123265	0.974651	0.658982	0.90803	0.146338	O08788|DCTN1_MOUSE Dynactin subunit 1 OS=Mus musculus GN=Dctn1 PE=1 SV=3	1.17245e+06	1.26599e+06	1.29084e+06	1.12202e+06	1.23564e+06	1.04346e+06	1.33166e+06	1.64464e+06	1.43187e+06	1.60306e+06	1.43302e+06	1.45882e+06	1.3416e+06	1.37529e+06	1.09475e+06	1.34488e+06	1.36142e+06	1.20927e+06	1.38611e+06	1.23185e+06
Q99KJ8	8	444.95	Dctn2	1.06561	0.297074	1.17328	0.0725212	0.942479	0.563879	Q99KJ8|DCTN2_MOUSE Dynactin subunit 2 OS=Mus musculus GN=Dctn2 PE=1 SV=3	4.44777e+06	4.77867e+06	4.11884e+06	4.52352e+06	4.43616e+06	4.92957e+06	3.80913e+06	5.15937e+06	4.91429e+06	4.95599e+06	5.7277e+06	5.11979e+06	4.17997e+06	3.70332e+06	4.9355e+06	6.05337e+06	5.7796e+06	5.4542e+06	5.02287e+06	5.45718e+06
Q9Z0Y1	1	50.3	Dctn3	0.869732	0.212834	0.891754	0.577201	1.07727	0.447588	Q9Z0Y1|DCTN3_MOUSE Dynactin subunit 3 OS=Mus musculus GN=Dctn3 PE=1 SV=2	290344	266686	279578	348675	345890	229485	238495	310284	216774	336672	276151	255291	308845	214615	366442	437430	213677	203269	188831	224282
Q8CBY8	1	37.42	Dctn4	1.21717	0.0150535	0.987924	0.912219	0.778478	0.00553277	Q8CBY8|DCTN4_MOUSE Dynactin subunit 4 OS=Mus musculus GN=Dctn4 PE=1 SV=1	1.95038e+06	1.99962e+06	1.94234e+06	2.27159e+06	2.11337e+06	2.55293e+06	2.86116e+06	2.30369e+06	2.12294e+06	2.66854e+06	2.66849e+06	2.13389e+06	3.04929e+06	2.74787e+06	2.60225e+06	2.38344e+06	3.08758e+06	3.02438e+06	2.7508e+06	1.79616e+06
Q9WUB4	1	50.94	Dctn6	4.91802	0.00149575	0.3414	0.0001011	0.264609	4.44532e-06	Q9WUB4|DCTN6_MOUSE Dynactin subunit 6 OS=Mus musculus GN=Dctn6 PE=1 SV=1	21827	22073.1	31226.9	27111.9	18498.6	187582	88762.1	98624.6	138628	80193	96616.9	117773	75156.9	77659.7	89080.3	27326.7	34077	19392.1	35613.5	39367.3
Q8BZJ7	2	124.68	Dcun1d2	0.845615	0.135	0.844215	0.0768419	0.909648	0.374932	Q8BZJ7|DCNL2_MOUSE DCN1-like protein 2 OS=Mus musculus GN=Dcun1d2 PE=1 SV=3	586182	779154	521004	539492	511594	506261	480312	422796	561725	512835	571116	553060	799740	702000	603274	524338	494470	570271	540646	596405
Q99LD8;Q9CWS0	4	84.99	Ddah2	0.7842	0.00529671	0.967068	0.749377	1.05428	0.493082	Q99LD8|DDAH2_MOUSE N(G),N(G)-dimethylarginine dimethylaminohydrolase 2 OS=Mus musculus GN=Ddah2 PE=1 SV=1	869043	845674	892493	1.07474e+06	988887	794748	619845	717448	743013	787813	852624	978290	743200	789236	1.06699e+06	800687	1.04678e+06	702345	766645	967980
Q3U1J4	12	508.91	Ddb1	1.2883	0.0351836	0.909177	0.41576	0.894419	0.336868	Q3U1J4|DDB1_MOUSE DNA damage-binding protein 1 OS=Mus musculus GN=Ddb1 PE=1 SV=2	2.00017e+06	1.68601e+06	1.61995e+06	1.41889e+06	1.4421e+06	2.0983e+06	2.14013e+06	1.53588e+06	2.33808e+06	2.40931e+06	1.54185e+06	1.43069e+06	1.93003e+06	2.2229e+06	2.00574e+06	1.49177e+06	1.30767e+06	1.91696e+06	1.62582e+06	1.95966e+06
O54734	5	236.5	Ddost	1.32237	0.0715456	1.28043	0.0205011	0.946381	0.571436	O54734|OST48_MOUSE Dolichyl-diphosphooligosaccharide--protein glycosyltransferase 48 kDa subunit OS=Mus musculus GN=Ddost PE=1 SV=2	785473	655301	707275	628412	572637	969752	953717	601026	741601	1.16266e+06	571742	644318	751769	713009	858010	1.00433e+06	960741	729193	875693	961273
O35215	4	219.34	Ddt	0.707839	0.00222118	1.09695	0.120253	1.1994	0.0487694	O35215|DOPD_MOUSE D-dopachrome decarboxylase OS=Mus musculus GN=Ddt PE=1 SV=3	8.57553e+06	1.02637e+07	1.01109e+07	1.10336e+07	7.77956e+06	7.4143e+06	6.18367e+06	6.63771e+06	6.58433e+06	6.98875e+06	8.83419e+06	8.29377e+06	7.45648e+06	7.01828e+06	8.22005e+06	7.90157e+06	9.67356e+06	8.53178e+06	9.13342e+06	8.44336e+06
Q91VR5	11	391.42	Ddx1	1.24063	0.0798686	1.19138	0.0184718	1.03373	0.664911	Q91VR5|DDX1_MOUSE ATP-dependent RNA helicase DDX1 OS=Mus musculus GN=Ddx1 PE=1 SV=1	1.70218e+06	1.63083e+06	1.75413e+06	1.82938e+06	2.19762e+06	1.67691e+06	2.21808e+06	2.08122e+06	2.49565e+06	2.83537e+06	1.8472e+06	1.72919e+06	1.86503e+06	1.92713e+06	1.44824e+06	2.3727e+06	2.15429e+06	1.95436e+06	1.97175e+06	2.05102e+06
Q61655	1	15.87	Ddx19a	0.842791	0.562261	0.998724	0.992702	0.960837	0.605838	Q61655|DD19A_MOUSE ATP-dependent RNA helicase DDX19A OS=Mus musculus GN=Ddx19a PE=1 SV=2	1.63992e+06	1.86776e+06	1.87166e+06	2.17947e+06	4.92751e+06	1.75942e+06	1.51939e+06	2.40355e+06	2.14175e+06	2.69926e+06	2.9765e+06	2.13106e+06	2.75396e+06	2.02982e+06	3.10391e+06	3.27775e+06	2.64744e+06	2.18322e+06	3.07451e+06	1.79575e+06
Q9Z1N5;Q8VDW0	9	309.36	Ddx39b	1.28038	0.00662301	1.23435	0.000398536	0.931173	0.0875942	Q9Z1N5|DX39B_MOUSE Spliceosome RNA helicase Ddx39b OS=Mus musculus GN=Ddx39b PE=1 SV=1	2.78454e+06	2.73257e+06	2.99505e+06	3.05572e+06	3.27694e+06	4.56573e+06	3.36965e+06	3.51475e+06	3.80394e+06	3.75299e+06	3.06256e+06	3.40474e+06	3.12758e+06	3.15549e+06	3.19169e+06	4.32297e+06	3.97214e+06	3.77196e+06	3.96499e+06	3.64606e+06
Q62167	1	284.95	Ddx3x	0.635208	0.0309757	0.698172	0.0553719	1.11191	0.554627	Q62167|DDX3X_MOUSE ATP-dependent RNA helicase DDX3X OS=Mus musculus GN=Ddx3x PE=1 SV=3	81017.4	41929.1	58881.4	79043.1	56593.2	50845.1	49820.4	37104.9	23676.8	40208.8	41752.8	69404.5	61200.2	66575.2	46579	46720.1	34351.6	31783.9	57622	28858.6
Q62095;P16381	2	298.36	Ddx3y	1.39139	0.103244	0.782858	0.178423	0.845286	0.316154	Q62095|DDX3Y_MOUSE ATP-dependent RNA helicase DDX3Y OS=Mus musculus GN=Ddx3y PE=1 SV=2	40577.4	59675.8	33925.3	63731.6	50553.3	55412.7	75468.3	49393.4	65091.5	100343	72420.6	45671	68038.3	65127	42683.2	49365.1	29934.7	50207.2	64977	35629.5
Q4FZF3	1	13.51	Ddx49	0.953662	0.638934	1.20299	0.173866	1.16641	0.119621	Q4FZF3|DDX49_MOUSE Probable ATP-dependent RNA helicase DDX49 OS=Mus musculus GN=Ddx49 PE=2 SV=1	97826.1	72605.8	83487.6	88105.9	73512.3	93271.1	60798.2	69869.7	92602.8	79740.8	88087.9	60283.6	77806.1	67913.5	62161.2	105761	98940.2	88542.1	74754.9	60569.6
Q61656;Q501J6	8	352.97	Ddx5	1.05449	0.357199	1.18369	0.065009	1.01063	0.849467	Q61656|DDX5_MOUSE Probable ATP-dependent RNA helicase DDX5 OS=Mus musculus GN=Ddx5 PE=1 SV=2	2.02356e+06	2.1595e+06	2.27128e+06	2.55841e+06	2.16836e+06	2.26928e+06	2.44175e+06	2.09214e+06	2.37525e+06	2.61191e+06	2.1465e+06	2.41674e+06	2.04925e+06	2.50927e+06	1.9417e+06	3.0887e+06	2.6003e+06	2.73549e+06	2.55211e+06	2.11911e+06
P54823	3	94.44	Ddx6	1.42921	0.0202734	1.13024	0.142225	0.812175	0.0734337	P54823|DDX6_MOUSE Probable ATP-dependent RNA helicase DDX6 OS=Mus musculus GN=Ddx6 PE=1 SV=1	251786	274115	209195	288494	261516	443449	390992	231441	378372	392428	308877	371093	324109	346467	231756	391962	356649	354842	342243	342691
Q9CQ62	21	1705.56	Decr1	0.958747	0.543696	0.795194	0.000165279	0.933726	0.203118	Q9CQ62|DECR_MOUSE 2,4-dienoyl-CoA reductase, mitochondrial OS=Mus musculus GN=Decr1 PE=1 SV=1	2.33687e+08	2.02677e+08	2.41741e+08	2.0771e+08	1.8158e+08	2.20624e+08	2.21202e+08	1.75265e+08	2.09674e+08	1.96597e+08	2.30832e+08	2.35615e+08	2.32875e+08	2.22902e+08	2.20932e+08	1.75645e+08	1.64459e+08	2.04072e+08	1.82866e+08	1.81989e+08
Q7TNV0	1	63.04	Dek	1.38975	0.136044	1.01129	0.899092	0.741539	0.0690847	Q7TNV0|DEK_MOUSE Protein DEK OS=Mus musculus GN=Dek PE=1 SV=1	85483.1	98326.6	95597.4	183412	126029	230316	174079	156184	97059.4	160712	155239	178440	119951	155577	184881	175552	173526	162670	158092	133209
Q9CQJ6	1	89.1	Denr	0.526983	0.00755346	1.0792	0.637368	1.5049	0.0452781	Q9CQJ6|DENR_MOUSE Density-regulated protein OS=Mus musculus GN=Denr PE=1 SV=1	268105	478912	382098	517997	293450	233676	186646	251647	175338	175339	353040	254515	264127	181492	236319	380637	255348	314052	205386	236203
P31001;P08551	54	3626.72	Des	1.0833	0.271453	1.20287	0.00436567	0.999101	0.994242	P31001|DESM_MOUSE Desmin OS=Mus musculus GN=Des PE=1 SV=3	8.1857e+08	9.07345e+08	9.0394e+08	8.73551e+08	8.94574e+08	1.13413e+09	7.64815e+08	9.09231e+08	9.88517e+08	9.67646e+08	9.17832e+08	8.96844e+08	8.31665e+08	8.20997e+08	9.34602e+08	1.13235e+09	1.11499e+09	1.1213e+09	9.68519e+08	9.57798e+08
Q9QX60	3	111.72	Dguok	0.991753	0.938988	0.582473	7.9802e-05	0.850197	0.00152384	Q9QX60|DGUOK_MOUSE Deoxyguanosine kinase, mitochondrial OS=Mus musculus GN=Dguok PE=1 SV=3	990267	1.14265e+06	1.11427e+06	1.13978e+06	1.09516e+06	1.279e+06	1.39223e+06	1.04669e+06	934857	784137	1.31703e+06	1.25431e+06	1.19597e+06	1.32828e+06	1.35247e+06	904401	618767	689699	922237	620719
Q9DBB8	6	328.75	Dhdh	0.995768	0.981487	1.08482	0.272943	1.01867	0.737836	Q9DBB8|DHDH_MOUSE Trans-1,2-dihydrobenzene-1,2-diol dehydrogenase OS=Mus musculus GN=Dhdh PE=1 SV=1	1.07519e+06	1.00033e+06	936110	1.01103e+06	928062	1.67672e+06	805291	811286	789922	846562	961781	995073	1.05631e+06	723358	1.12348e+06	1.04637e+06	1.06966e+06	1.04744e+06	1.00319e+06	1.10558e+06
O35435	2	37.14	Dhodh	0.625065	0.000608372	0.81552	0.0741128	0.950416	0.606982	O35435|PYRD_MOUSE Dihydroorotate dehydrogenase (quinone), mitochondrial OS=Mus musculus GN=Dhodh PE=1 SV=2	205731	231673	205820	185805	168265	134356	120766	95021.5	126256	146975	238741	178394	252010	190157	190022	153164	215461	172335	162882	151904
Q99L04	1	36.36	Dhrs1	0.241879	0.0134874	0.855716	0.508359	1.6394	0.131299	Q99L04|DHRS1_MOUSE Dehydrogenase/reductase SDR family member 1 OS=Mus musculus GN=Dhrs1 PE=1 SV=1	27839.1	41918.2	66202.6	86629.2	61682.9	0	0	23172.5	45586.9	0	13552.4	38483.6	44876.4	48926.2	27561	29174.7	30122	33903.8	37575.7	17604.8
Q3U0B3	3	137.75	Dhrs11	0.964361	0.724337	0.948469	0.459353	0.997737	0.966307	Q3U0B3|DHR11_MOUSE Dehydrogenase/reductase SDR family member 11 OS=Mus musculus GN=Dhrs11 PE=1 SV=1	1.1486e+06	983093	1.2398e+06	1.29505e+06	1.11277e+06	951542	1.16664e+06	838516	1.39647e+06	1.22019e+06	1.05099e+06	1.08969e+06	1.08813e+06	1.24918e+06	1.31443e+06	1.1327e+06	912653	1.26239e+06	1.06511e+06	1.12109e+06
Q99LB2	10	596.04	Dhrs4	0.997603	0.961313	0.901124	0.0250899	0.939568	0.099625	Q99LB2|DHRS4_MOUSE Dehydrogenase/reductase SDR family member 4 OS=Mus musculus GN=Dhrs4 PE=1 SV=3	4.60094e+07	4.27626e+07	4.45647e+07	4.39832e+07	4.41667e+07	5.06832e+07	4.59185e+07	3.83909e+07	4.41777e+07	4.17853e+07	4.88364e+07	5.07506e+07	4.8044e+07	4.26054e+07	4.54959e+07	4.17857e+07	3.97452e+07	4.17042e+07	4.45718e+07	4.46172e+07
Q8CHS7	1	51.04	Dhrs7c	3.26101	0.0975165	0.849497	0.797746	0.890985	0.401424	Q8CHS7|DRS7C_MOUSE Dehydrogenase/reductase SDR family member 7C OS=Mus musculus GN=Dhrs7c PE=1 SV=3	72191.3	52597.4	16831.5	0	11215.2	218223	122440	40731.8	26922.8	90079.2	7905.73	24276.9	15410.3	28060.5	95881.8	5251.2	0	36846.4	58993.6	44627.6
O70133	2	87.77	Dhx9	1.6567	0.0145512	1.02263	0.926492	0.791715	0.473254	O70133|DHX9_MOUSE ATP-dependent RNA helicase A OS=Mus musculus GN=Dhx9 PE=1 SV=2	78908.7	79955.8	71581	58581.9	52407.6	143454	112327	71907.5	98042.5	139925	46237.8	51263.7	108001	128009	97748.5	46789.4	79902.2	99363.4	124462	90500.6
Q9JIQ3	4	288.63	Diablo	1.82775	0.0276761	0.674521	0.00964626	0.640974	0.00897497	Q9JIQ3|DBLOH_MOUSE Diablo homolog, mitochondrial OS=Mus musculus GN=Diablo PE=1 SV=2	1.93647e+06	2.66474e+06	1.62914e+06	2.57736e+06	2.48291e+06	6.70303e+06	4.10994e+06	3.21893e+06	3.45821e+06	3.14631e+06	3.63286e+06	2.59481e+06	3.97473e+06	3.14531e+06	4.26708e+06	2.63902e+06	1.97869e+06	2.23204e+06	2.86326e+06	2.16853e+06
Q5PR73	1	17.19	Diras2	0.900511	0.614819	1.64657	0.0222899	1.14177	0.650225	Q5PR73|DIRA2_MOUSE GTP-binding protein Di-Ras2 OS=Mus musculus GN=Diras2 PE=1 SV=1	32707.9	72124.3	78658.2	88669.7	79255.5	30994.8	55509.5	77909.8	72628	79411.2	59098.8	56727.8	45023.2	65555.4	81375.5	112442	92094.4	139599	101098	61550.1
Q8BMF4	28	2016.31	Dlat	1.01011	0.814753	0.78128	0.00221208	0.954182	0.352081	Q8BMF4|ODP2_MOUSE Dihydrolipoyllysine-residue acetyltransferase component of pyruvate dehydrogenase complex, mitochondrial OS=Mus musculus GN=Dlat PE=1 SV=2	2.66959e+08	2.40674e+08	2.50762e+08	2.60025e+08	2.82159e+08	2.74297e+08	2.87689e+08	2.60965e+08	2.44573e+08	2.46209e+08	2.99887e+08	2.78008e+08	2.82531e+08	2.62087e+08	2.40518e+08	2.34159e+08	1.95325e+08	1.92008e+08	2.10158e+08	2.33258e+08
O08749	33	2352.86	Dld	0.99389	0.747257	0.822022	0.00270549	0.947718	0.252866	O08749|DLDH_MOUSE Dihydrolipoyl dehydrogenase, mitochondrial OS=Mus musculus GN=Dld PE=1 SV=2	3.15449e+08	3.29266e+08	3.26928e+08	3.3222e+08	3.20931e+08	3.33719e+08	3.27382e+08	3.23901e+08	3.26367e+08	3.03497e+08	3.59504e+08	3.39029e+08	3.60013e+08	3.6257e+08	2.9331e+08	2.89412e+08	2.65135e+08	2.72959e+08	2.85123e+08	2.96667e+08
Q811D0	1	57.97	Dlg1	0.879865	0.128703	1.06194	0.671222	1.08616	0.330812	Q811D0|DLG1_MOUSE Disks large homolog 1 OS=Mus musculus GN=Dlg1 PE=1 SV=1	119186	123608	114780	106722	108296	126081	83217.2	102069	104066	88370.2	77309.6	100428	118011	130681	100739	112757	105421	93419.7	91871.1	156353
Q6PFD5	1	18.38	Dlgap3	0.67328	0.535527	0.83781	0.71675	0.987704	0.602969	Q6PFD5|DLGP3_MOUSE Disks large-associated protein 3 OS=Mus musculus GN=Dlgap3 PE=1 SV=1	1.14218e+06	57073.1	541866	62786.9	672872	6571.43	350719	861899	289293	159081	1.18998e+06	354524	525146	262917	175040	674244	556846	79887.2	199446	590478
Q9D2G2	19	1673.35	Dlst	0.921577	0.0273434	0.911581	0.0338083	0.967022	0.433477	Q9D2G2|ODO2_MOUSE Dihydrolipoyllysine-residue succinyltransferase component of 2-oxoglutarate dehydrogenase complex, mitochondrial OS=Mus musculus GN=Dlst PE=1 SV=1	2.39452e+08	2.20666e+08	2.34954e+08	2.20664e+08	2.17665e+08	2.18755e+08	2.1128e+08	1.90889e+08	2.16375e+08	2.07217e+08	2.5727e+08	2.39681e+08	2.4016e+08	2.23736e+08	2.11205e+08	2.17415e+08	2.18536e+08	2.12686e+08	2.07539e+08	2.12244e+08
P11531;Q05AA6	34	1569.15	Dmd	1.00095	0.990416	0.90575	0.251524	0.99121	0.928539	P11531|DMD_MOUSE Dystrophin OS=Mus musculus GN=Dmd PE=1 SV=3	1.25158e+07	1.1256e+07	1.11547e+07	1.07423e+07	1.28699e+07	1.08032e+07	1.46215e+07	1.03511e+07	1.05814e+07	1.22371e+07	1.04756e+07	1.19905e+07	1.04221e+07	1.24989e+07	1.36708e+07	9.36078e+06	8.88982e+06	1.16784e+07	1.20833e+07	1.14793e+07
Q9QYJ0	10	609.25	Dnaja2	0.989621	0.837264	1.13211	0.00165334	1.10711	0.0249188	Q9QYJ0|DNJA2_MOUSE DnaJ homolog subfamily A member 2 OS=Mus musculus GN=Dnaja2 PE=1 SV=1	1.00171e+07	1.0485e+07	9.10121e+06	1.00605e+07	9.12088e+06	1.00778e+07	8.37022e+06	9.24248e+06	1.06217e+07	9.96608e+06	9.21255e+06	8.63468e+06	9.09532e+06	8.10797e+06	9.01446e+06	1.00848e+07	1.02815e+07	9.90678e+06	9.43255e+06	1.01807e+07
Q99M87	7	594.39	Dnaja3	0.845658	0.0255382	1.08662	0.143331	1.06249	0.283556	Q99M87|DNJA3_MOUSE DnaJ homolog subfamily A member 3, mitochondrial OS=Mus musculus GN=Dnaja3 PE=1 SV=1	6.58572e+06	7.48725e+06	6.7089e+06	6.96957e+06	6.49473e+06	6.40839e+06	6.20427e+06	4.56317e+06	6.25672e+06	5.52799e+06	7.00852e+06	6.75655e+06	7.02085e+06	5.97941e+06	5.46662e+06	6.83158e+06	7.03347e+06	7.53014e+06	6.99962e+06	6.62896e+06
Q9JMC3	4	222.97	Dnaja4	1.07693	0.462425	1.28328	0.00189941	1.1173	0.157816	Q9JMC3|DNJA4_MOUSE DnaJ homolog subfamily A member 4 OS=Mus musculus GN=Dnaja4 PE=1 SV=1	1.81347e+06	1.83442e+06	2.00082e+06	1.60388e+06	1.45671e+06	1.79756e+06	1.74862e+06	1.43757e+06	2.1908e+06	2.20476e+06	1.38912e+06	1.57722e+06	1.5533e+06	1.78838e+06	1.48695e+06	1.95669e+06	1.92678e+06	1.87085e+06	1.97055e+06	2.2783e+06
Q99KV1	1	95.97	Dnajb11	0.948643	0.821406	1.91458	0.00264968	1.03286	0.617016	Q99KV1|DJB11_MOUSE DnaJ homolog subfamily B member 11 OS=Mus musculus GN=Dnajb11 PE=1 SV=1	147666	129333	138240	141711	132022	38875	104490	116257	203059	190909	131924	188149	89524.3	74771.4	182682	252674	309137	267242	237835	210232
Q9QYI5	1	85.39	Dnajb2	0.569944	0.0503125	1.51685	0.220935	2.14611	0.0810241	Q9QYI5|DNJB2_MOUSE DnaJ homolog subfamily B member 2 OS=Mus musculus GN=Dnajb2 PE=1 SV=3	88037.3	137415	87138.1	116605	55290.5	91762.7	46256.4	25837.3	43135.5	69137.5	63471.2	52301.8	5013.81	36678.2	68285.4	17761.1	66391.8	80214.9	86277.3	91783.7
Q9D832;Q9QYJ3	7	300.57	Dnajb4	1.14885	0.0588757	1.05222	0.514583	1.0015	0.920169	Q9D832|DNJB4_MOUSE DnaJ homolog subfamily B member 4 OS=Mus musculus GN=Dnajb4 PE=1 SV=1	2.39468e+06	2.52092e+06	2.70878e+06	2.62902e+06	2.54554e+06	3.57235e+06	2.7799e+06	2.76486e+06	2.64497e+06	2.94194e+06	2.8892e+06	2.53994e+06	2.25033e+06	2.30852e+06	2.79181e+06	3.0761e+06	2.76906e+06	2.90832e+06	2.40269e+06	2.29098e+06
O54946	1	43.61	Dnajb6	1.12105	0.754285	1.30481	0.331208	1.06688	0.784342	O54946|DNJB6_MOUSE DnaJ homolog subfamily B member 6 OS=Mus musculus GN=Dnajb6 PE=1 SV=4	25639	24281.1	10043.7	19970.4	7867.76	38199.7	22984.2	17393.9	5180.32	14672.2	25370.5	20686.1	15878	4118.33	16244.8	23307.4	33189.9	20464.1	14750.2	15670.9
Q5U458	2	38.4	Dnajc11	1.38977	0.486279	0.944261	0.864665	1.27254	0.846858	Q5U458|DJC11_MOUSE DnaJ homolog subfamily C member 11 OS=Mus musculus GN=Dnajc11 PE=1 SV=2	83684.8	218175	38995.7	50634.7	19865.4	168624	168727	90564	31330.6	112444	23959	22789.4	85276.2	91533.2	99696.7	20061.9	86698.7	55204.7	72960.3	70310.9
Q6NZB0	1	25.32	Dnajc8	0.768247	0.224435	1.69077	0.0170746	1.31976	0.169946	Q6NZB0|DNJC8_MOUSE DnaJ homolog subfamily C member 8 OS=Mus musculus GN=Dnajc8 PE=1 SV=2	173591	135728	139272	233825	133288	194282	79545	153879	90189.3	108768	162552	136904	84438.3	69727.4	164451	179696	224181	283142	175924	182076
Q9D113	1	24.55	Dnlz	#DIV/0!	0.346594	#DIV/0!	#DIV/0!	#DIV/0!	0.9995	Q9D113|DNLZ_MOUSE DNL-type zinc finger protein OS=Mus musculus GN=Dnlz PE=1 SV=1	0	0	0	0	0	21987.4	0	0	0	0	0	0	0	0	0	0	0	0	0	0
Q8K1M6	21	1160.41	Dnm1l	1.02172	0.773701	0.914499	0.0542998	0.93026	0.218919	Q8K1M6|DNM1L_MOUSE Dynamin-1-like protein OS=Mus musculus GN=Dnm1l PE=1 SV=2	1.004e+07	8.77633e+06	1.10524e+07	9.02946e+06	8.49169e+06	8.02314e+06	1.02544e+07	9.05476e+06	1.08291e+07	1.02579e+07	9.74336e+06	1.01516e+07	1.07931e+07	1.08866e+07	9.36795e+06	9.20396e+06	8.4061e+06	9.72568e+06	9.44691e+06	9.80431e+06
P39054;P39053;Q8BZ98	6	270.19	Dnm2	0.92789	0.504757	1.48834	4.81535e-05	1.19671	0.025791	P39054|DYN2_MOUSE Dynamin-2 OS=Mus musculus GN=Dnm2 PE=1 SV=2	756723	750615	861548	743045	645408	500970	639696	637238	820907	887586	547840	687524	604258	705626	594464	971869	935786	985063	938190	842060
Q9Z2W0	7	364.9	Dnpep	1.05101	0.508462	1.01714	0.753291	0.98503	0.823762	Q9Z2W0|DNPEP_MOUSE Aspartyl aminopeptidase OS=Mus musculus GN=Dnpep PE=1 SV=2	2.42951e+06	2.47694e+06	2.37244e+06	2.32153e+06	2.53792e+06	1.88055e+06	2.70894e+06	2.54416e+06	2.83027e+06	2.79355e+06	2.3702e+06	2.44301e+06	2.50021e+06	2.86124e+06	2.14814e+06	2.47352e+06	2.32398e+06	2.52463e+06	2.52027e+06	2.69165e+06
P31428	5	166.42	Dpep1	0.389283	0.0322267	1.00627	0.986242	0.913672	0.801465	P31428|DPEP1_MOUSE Dipeptidase 1 OS=Mus musculus GN=Dpep1 PE=1 SV=2	467067	1.15776e+06	540949	561419	341184	178682	297478	321101	162101	235104	288887	687301	733441	496387	1.15227e+06	195899	1.24801e+06	926252	623001	386169
Q99KK7	2	67.31	Dpp3	1.25477	0.0520793	0.866309	0.52426	0.966564	0.980145	Q99KK7|DPP3_MOUSE Dipeptidyl peptidase 3 OS=Mus musculus GN=Dpp3 PE=1 SV=2	187002	215260	226038	209639	193914	317261	240069	187862	262153	287394	138304	182409	327359	214244	205228	156639	179818	137271	152379	298717
Q9QZZ6	4	152.77	Dpt	0.919138	0.499234	1.36237	0.168753	1.01466	0.779844	Q9QZZ6|DERM_MOUSE Dermatopontin OS=Mus musculus GN=Dpt PE=1 SV=1	5.11827e+06	6.34061e+06	5.95419e+06	5.71157e+06	3.57456e+06	6.23716e+06	5.07684e+06	4.79142e+06	4.20339e+06	4.23146e+06	3.93242e+06	9.23721e+06	4.79513e+06	3.62109e+06	4.72765e+06	6.06854e+06	1.00382e+07	6.96747e+06	6.77707e+06	5.99736e+06
O08553;P97427	23	1743.3	Dpysl2	1.15964	0.00483166	1.17248	0.0348382	0.982706	0.765574	O08553|DPYL2_MOUSE Dihydropyrimidinase-related protein 2 OS=Mus musculus GN=Dpysl2 PE=1 SV=2	2.63864e+07	2.91022e+07	2.81687e+07	2.78045e+07	2.74054e+07	3.58883e+07	3.00703e+07	3.02148e+07	3.20679e+07	3.27947e+07	2.5436e+07	3.0123e+07	2.82224e+07	2.57636e+07	3.17661e+07	3.54272e+07	3.7751e+07	3.17844e+07	3.05236e+07	3.01983e+07
Q62188	6	495.35	Dpysl3	1.05465	0.566794	1.28879	0.0279981	0.95624	0.203572	Q62188|DPYL3_MOUSE Dihydropyrimidinase-related protein 3 OS=Mus musculus GN=Dpysl3 PE=1 SV=1	2.04338e+06	1.92485e+06	2.1818e+06	2.24084e+06	2.11695e+06	1.67011e+06	1.97612e+06	2.74872e+06	2.40228e+06	2.28488e+06	2.21213e+06	2.27341e+06	2.10251e+06	2.09852e+06	2.30212e+06	2.24049e+06	3.67634e+06	2.72362e+06	2.79752e+06	2.72416e+06
Q7TSF0	1	37.48	Dsg1c	0.224338	0.334406	3.25931	0.384635	3.73136	0.535681	Q7TSF0|DSG1C_MOUSE Desmoglein-1-gamma OS=Mus musculus GN=Dsg1c PE=1 SV=1	67735.8	989214	112234	17858.9	49365.6	111093	33839.4	50809.8	22525.6	59105.9	73624.9	23640.8	92654.8	38733.6	102703	66646.4	46129.3	41453	864084	61680.9
O55111	3	236.33	Dsg2	1.31956	0.216986	1.38445	0.168227	0.957844	0.917952	O55111|DSG2_MOUSE Desmoglein-2 OS=Mus musculus GN=Dsg2 PE=1 SV=3	551093	671468	696013	323349	286373	784781	628827	444435	554223	923980	347460	464992	491097	351608	984412	548355	900087	702781	656802	846318
E9Q557	34	1466.96	Dsp	0.837447	0.737755	1.26758	0.577333	1.43903	0.635448	E9Q557|DESP_MOUSE Desmoplakin OS=Mus musculus GN=Dsp PE=1 SV=1	6.0467e+06	2.61214e+07	6.2693e+06	4.56745e+06	4.10456e+06	9.44446e+06	1.18738e+07	7.61426e+06	3.52323e+06	6.99593e+06	2.45392e+06	8.04594e+06	6.86236e+06	4.3895e+06	1.09852e+07	4.14193e+06	5.78608e+06	4.8074e+06	1.84331e+07	8.32804e+06
Q9R0P5	6	400.5	Dstn	1.21715	0.0969517	0.886103	0.0897438	0.953349	0.503177	Q9R0P5|DEST_MOUSE Destrin OS=Mus musculus GN=Dstn PE=1 SV=3	1.38471e+07	1.41794e+07	1.54317e+07	1.55761e+07	1.14355e+07	2.21137e+07	1.53658e+07	1.82156e+07	1.64578e+07	1.36196e+07	1.48552e+07	1.69072e+07	1.28317e+07	1.43425e+07	1.49815e+07	1.4457e+07	1.40851e+07	1.27284e+07	1.11725e+07	1.30562e+07
Q9DD18	2	88.5	Dtd1	1.13708	0.566952	1.39392	0.0450877	0.96638	0.663611	Q9DD18|DTD1_MOUSE D-tyrosyl-tRNA(Tyr) deacylase 1 OS=Mus musculus GN=Dtd1 PE=1 SV=2	194121	266688	71013.1	261407	214736	339518	158622	209341	219548	219101	252285	166703	189203	187962	246879	283748	351557	356001	192605	269995
Q9D2N4	3	138.95	Dtna	0.876268	0.445037	1.0872	0.687932	1.1534	0.352011	Q9D2N4|DTNA_MOUSE Dystrobrevin alpha OS=Mus musculus GN=Dtna PE=1 SV=2	573450	637153	413857	385870	472419	500269	485058	295975	296681	597570	299529	406289	356520	406031	684175	300670	362323	498979	637913	540353
P97930	1	26.5	Dtymk	0.64536	0.103779	1.00922	0.960617	1.03024	0.74694	P97930|KTHY_MOUSE Thymidylate kinase OS=Mus musculus GN=Dtymk PE=1 SV=2	124138	157060	142513	203405	170801	0	119412	165982	102652	126897	135734	119083	241119	151040	127520	168956	213729	143227	110074	145653
Q9D7X3	3	303.65	Dusp3	1.08651	0.403777	1.16481	0.0180634	1.05965	0.376712	Q9D7X3|DUS3_MOUSE Dual specificity protein phosphatase 3 OS=Mus musculus GN=Dusp3 PE=1 SV=1	2.46126e+06	2.9788e+06	2.53824e+06	2.94698e+06	2.5664e+06	3.78479e+06	2.4819e+06	2.47574e+06	3.06695e+06	2.84952e+06	2.70665e+06	2.61637e+06	2.09232e+06	2.58631e+06	2.73059e+06	3.22436e+06	2.92968e+06	2.99899e+06	2.72165e+06	2.95597e+06
Q9JHU4	20	835.52	Dync1h1	1.6462	0.144889	1.01455	0.917966	0.883034	0.541696	Q9JHU4|DYHC1_MOUSE Cytoplasmic dynein 1 heavy chain 1 OS=Mus musculus GN=Dync1h1 PE=1 SV=2	3.46866e+06	2.72698e+06	3.23283e+06	1.65028e+06	2.00604e+06	7.96561e+06	4.07282e+06	2.78628e+06	2.37316e+06	4.34236e+06	1.77582e+06	2.70336e+06	3.30547e+06	2.9125e+06	4.12084e+06	2.55246e+06	3.18709e+06	3.11424e+06	3.30408e+06	2.87579e+06
O88487	7	370.11	Dync1i2	1.09707	0.0247243	1.33059	0.00796906	1.06632	0.325971	O88487|DC1I2_MOUSE Cytoplasmic dynein 1 intermediate chain 2 OS=Mus musculus GN=Dync1i2 PE=1 SV=1	2.73033e+06	3.13125e+06	3.08003e+06	2.91647e+06	2.99069e+06	2.98066e+06	3.28502e+06	3.25741e+06	3.4556e+06	3.31146e+06	2.87179e+06	3.07759e+06	3.16848e+06	2.24806e+06	2.55928e+06	4.47935e+06	3.6478e+06	3.53323e+06	3.33896e+06	3.52943e+06
Q8R1Q8	8	292.01	Dync1li1	1.00778	0.925758	1.11723	0.0329703	1.03321	0.591121	Q8R1Q8|DC1L1_MOUSE Cytoplasmic dynein 1 light intermediate chain 1 OS=Mus musculus GN=Dync1li1 PE=1 SV=1	1.39528e+06	1.54709e+06	1.7048e+06	1.60077e+06	1.8282e+06	1.59355e+06	1.32318e+06	1.64266e+06	1.57949e+06	2.0001e+06	1.46537e+06	1.67345e+06	1.67353e+06	1.51779e+06	1.48642e+06	1.80511e+06	1.60109e+06	1.80721e+06	1.63527e+06	1.88419e+06
Q6PDL0	1	39.47	Dync1li2	0.881446	0.666967	1.12018	0.343677	0.999856	0.81321	Q6PDL0|DC1L2_MOUSE Cytoplasmic dynein 1 light intermediate chain 2 OS=Mus musculus GN=Dync1li2 PE=1 SV=2	81346.8	133315	164060	97923.2	83876.7	16130.1	171664	116485	86901.3	102890	102004	110158	130986	109384	108071	112677	160600	116233	91497.9	146970
Q9D0M5;P63168	3	354.77	Dynll2	1.13766	0.239813	0.927224	0.196761	0.901076	0.125293	Q9D0M5|DYL2_MOUSE Dynein light chain 2, cytoplasmic OS=Mus musculus GN=Dynll2 PE=1 SV=1	6.00016e+06	6.05198e+06	5.01283e+06	5.37416e+06	4.60961e+06	7.82109e+06	5.86576e+06	4.63574e+06	5.95967e+06	6.49003e+06	5.66139e+06	5.56707e+06	5.78209e+06	6.60447e+06	6.40324e+06	5.76818e+06	4.79926e+06	5.49678e+06	5.55951e+06	6.20991e+06
P62627	3	157.89	Dynlrb1	0.683283	0.0790651	1.10111	0.25462	1.25407	0.267209	P62627|DLRB1_MOUSE Dynein light chain roadblock-type 1 OS=Mus musculus GN=Dynlrb1 PE=1 SV=3	1.53671e+06	3.35675e+06	2.63131e+06	3.43285e+06	2.28258e+06	2.46615e+06	1.36416e+06	2.19112e+06	1.37564e+06	1.64974e+06	2.249e+06	2.57496e+06	1.90653e+06	1.65835e+06	2.16892e+06	2.27989e+06	2.46328e+06	2.25328e+06	2.5316e+06	2.09718e+06
Q9ESD7	3	118.21	Dysf	8.0079	0.0457389	16.528	0.00325161	1.55407	0.615129	Q9ESD7|DYSF_MOUSE Dysferlin OS=Mus musculus GN=Dysf PE=1 SV=3	31337.8	61390.3	32129	19086.9	2671.83	181810	241608	35170.2	162238	553260	6710.82	30469.3	13370.5	5235.56	38556.7	99173.8	281940	339747	298170	540265
Q9CXJ1	1	23.85	Ears2	0.784105	0.522142	0.900134	0.526503	0.775173	0.27527	Q9CXJ1|SYEM_MOUSE Probable glutamate--tRNA ligase, mitochondrial OS=Mus musculus GN=Ears2 PE=1 SV=1	5051.98	18307.6	15008.3	26873.2	27867.4	0	17841.2	19148.1	10827.2	25190.4	28939.7	27046.2	24161.9	15416.5	24548.9	28213	11591.5	20813.5	23002.4	24497.6
O35459	27	2023.08	Ech1	0.830214	0.00403036	0.922198	0.0988241	0.964175	0.491786	O35459|ECH1_MOUSE Delta(3,5)-Delta(2,4)-dienoyl-CoA isomerase, mitochondrial OS=Mus musculus GN=Ech1 PE=1 SV=1	3.08069e+08	2.76276e+08	2.94639e+08	2.70348e+08	2.45213e+08	2.40185e+08	2.29869e+08	2.20987e+08	2.45906e+08	2.20824e+08	2.9977e+08	3.06591e+08	3.0283e+08	2.81863e+08	2.55308e+08	2.51929e+08	2.5693e+08	2.92718e+08	2.73608e+08	2.58647e+08
Q9D9V3	1	20.72	Echdc1	0.972664	0.926962	1.07092	0.643152	1.19841	0.34424	Q9D9V3|ECHD1_MOUSE Ethylmalonyl-CoA decarboxylase OS=Mus musculus GN=Echdc1 PE=1 SV=2	119707	104765	154669	79252.4	156337	12221	127975	145389	210641	101700	97879.7	96706.7	147488	105844	65034.6	101950	101599	91352	127514	126918
Q3TLP5	5	291.97	Echdc2	0.804128	0.182475	0.678188	0.00323834	0.905655	0.171144	Q3TLP5|ECHD2_MOUSE Enoyl-CoA hydratase domain-containing protein 2, mitochondrial OS=Mus musculus GN=Echdc2 PE=1 SV=2	1.32281e+06	1.47975e+06	1.41804e+06	1.73643e+06	1.64056e+06	602485	1.795e+06	1.25481e+06	1.1745e+06	1.28263e+06	1.59421e+06	1.75025e+06	1.88106e+06	1.4455e+06	1.71803e+06	1.47619e+06	857008	1.25763e+06	1.10891e+06	989617
Q9D7J9	5	327.87	Echdc3	0.954381	0.300114	0.891063	0.0866229	0.922078	0.180482	Q9D7J9|ECHD3_MOUSE Enoyl-CoA hydratase domain-containing protein 3, mitochondrial OS=Mus musculus GN=Echdc3 PE=1 SV=1	6.45142e+06	6.56591e+06	6.84099e+06	6.63475e+06	6.60316e+06	7.1437e+06	6.70214e+06	5.75586e+06	6.1468e+06	5.83791e+06	8.26542e+06	7.53377e+06	6.6348e+06	6.15926e+06	7.29984e+06	6.16864e+06	6.94342e+06	6.11122e+06	6.13724e+06	6.62249e+06
Q8BH95	24	1509.43	Echs1	0.984768	0.507616	0.908023	0.00955766	0.939194	0.0624078	Q8BH95|ECHM_MOUSE Enoyl-CoA hydratase, mitochondrial OS=Mus musculus GN=Echs1 PE=1 SV=1	2.20055e+08	2.27785e+08	2.38503e+08	2.32333e+08	2.28684e+08	2.3617e+08	2.16574e+08	2.2704e+08	2.33142e+08	2.16957e+08	2.59407e+08	2.53861e+08	2.44887e+08	2.39247e+08	2.24241e+08	2.24527e+08	2.13985e+08	2.18279e+08	2.23717e+08	2.28771e+08
P42125	17	1753.27	Eci1	0.907158	0.106572	0.79001	0.000267471	0.911389	0.0558229	P42125|ECI1_MOUSE Enoyl-CoA delta isomerase 1, mitochondrial OS=Mus musculus GN=Eci1 PE=1 SV=2	2.53256e+08	2.29164e+08	2.45839e+08	2.26756e+08	2.1883e+08	2.18475e+08	2.49399e+08	1.90928e+08	1.99877e+08	2.06184e+08	2.60204e+08	2.52379e+08	2.83847e+08	2.5797e+08	2.33572e+08	1.93554e+08	1.97527e+08	2.05494e+08	2.10703e+08	2.10233e+08
Q9WUR2;Q78JN3	9	669.6	Eci2	1.05182	0.670955	0.927184	0.237107	0.946447	0.491691	Q9WUR2|ECI2_MOUSE Enoyl-CoA delta isomerase 2, mitochondrial OS=Mus musculus GN=Eci2 PE=1 SV=2	2.33587e+07	2.81051e+07	2.22189e+07	2.66961e+07	2.79654e+07	3.65394e+07	2.44069e+07	1.96957e+07	2.80122e+07	2.6341e+07	2.82724e+07	2.77228e+07	2.90514e+07	2.90006e+07	2.15592e+07	2.47554e+07	2.28506e+07	2.61321e+07	2.6139e+07	2.58549e+07
Q9QZH6	2	72.14	Ecsit	0.74018	0.0928803	0.753812	0.155206	0.878303	0.481151	Q9QZH6|ECSIT_MOUSE Evolutionarily conserved signaling intermediate in Toll pathway, mitochondrial OS=Mus musculus GN=Ecsit PE=1 SV=2	177671	197341	173237	244179	274142	128752	232587	177802	117071	133241	364780	241805	236198	194580	176988	176977	182844	144021	255064	156486
Q9JMG1	1	15.97	Edf1	0.563775	0.00248646	1.6624	0.0473771	1.65766	0.0114041	Q9JMG1|EDF1_MOUSE Endothelial differentiation-related factor 1 OS=Mus musculus GN=Edf1 PE=1 SV=1	15382.5	20292.1	16300.8	24082.1	24012	13787.2	8802.73	11817.3	10609.9	11399.5	13018.1	13090.6	8308.06	9174.06	16777.2	23879.2	25562.4	24422.4	17126.2	9365.27
P10126	5	848.18	Eef1a1	1.19753	0.0260614	1.59979	0.000111787	1.20156	0.00347392	P10126|EF1A1_MOUSE Elongation factor 1-alpha 1 OS=Mus musculus GN=Eef1a1 PE=1 SV=3	9.18803e+06	9.94348e+06	1.0471e+07	1.0979e+07	9.92805e+06	1.32356e+07	1.06235e+07	1.11253e+07	1.13977e+07	1.41045e+07	7.55424e+06	9.03541e+06	8.84797e+06	7.97135e+06	8.62763e+06	1.53453e+07	1.45475e+07	1.25895e+07	1.16801e+07	1.30872e+07
P62631	9	1257.78	Eef1a2	1.0053	0.87811	1.00601	0.880993	1.06605	0.110844	P62631|EF1A2_MOUSE Elongation factor 1-alpha 2 OS=Mus musculus GN=Eef1a2 PE=1 SV=1	1.02722e+08	1.14328e+08	1.1013e+08	1.116e+08	1.08292e+08	1.00926e+08	1.11005e+08	1.05103e+08	1.15641e+08	1.17294e+08	1.11241e+08	1.03349e+08	1.04442e+08	1.0268e+08	9.14642e+07	1.07842e+08	9.51088e+07	1.05782e+08	1.00444e+08	1.07086e+08
O70251	8	476.66	Eef1b	0.967752	0.567312	1.10485	0.146636	1.12796	0.0832024	O70251|EF1B_MOUSE Elongation factor 1-beta OS=Mus musculus GN=Eef1b PE=1 SV=5	1.52088e+07	1.60384e+07	1.71118e+07	1.60777e+07	1.57233e+07	1.76961e+07	1.3099e+07	1.67847e+07	1.54098e+07	1.45855e+07	1.39982e+07	1.56452e+07	1.22668e+07	1.24315e+07	1.67244e+07	1.56483e+07	1.63079e+07	1.63853e+07	1.47445e+07	1.54316e+07
P57776	13	703.06	Eef1d	1.00713	0.865488	1.11833	0.105478	1.07012	0.207113	P57776|EF1D_MOUSE Elongation factor 1-delta OS=Mus musculus GN=Eef1d PE=1 SV=3	2.73288e+07	2.9761e+07	2.93721e+07	2.7892e+07	2.63838e+07	3.11194e+07	2.51032e+07	2.82298e+07	2.86338e+07	2.86554e+07	2.81719e+07	2.74639e+07	2.42276e+07	2.27319e+07	2.89206e+07	3.25094e+07	3.14947e+07	2.97839e+07	2.68e+07	2.64899e+07
Q9D8N0	9	424.08	Eef1g	1.41763	0.00129634	1.04874	0.521196	0.91358	0.327784	Q9D8N0|EF1G_MOUSE Elongation factor 1-gamma OS=Mus musculus GN=Eef1g PE=1 SV=3	8.61542e+06	7.07812e+06	7.53707e+06	7.18643e+06	6.66961e+06	1.14114e+07	1.06593e+07	8.43442e+06	1.06238e+07	1.14463e+07	7.0477e+06	6.7615e+06	8.65505e+06	9.85059e+06	8.28004e+06	9.05263e+06	8.16243e+06	8.52717e+06	8.08221e+06	8.7489e+06
P58252;O08810	32	1768.13	Eef2	1.12694	0.0218815	0.997014	0.95083	1.00854	0.791706	P58252|EF2_MOUSE Elongation factor 2 OS=Mus musculus GN=Eef2 PE=1 SV=2	7.56221e+07	7.08405e+07	7.16351e+07	7.40462e+07	7.32389e+07	8.9975e+07	8.25215e+07	7.11892e+07	8.17238e+07	8.63552e+07	6.52852e+07	6.76074e+07	7.55496e+07	8.21808e+07	7.16663e+07	7.35295e+07	6.7913e+07	6.99639e+07	7.24635e+07	7.73375e+07
Q8BPB5	1	54.66	Efemp1	0.969776	0.927532	2.11783	0.00112745	1.10175	0.74539	Q8BPB5|FBLN3_MOUSE EGF-containing fibulin-like extracellular matrix protein 1 OS=Mus musculus GN=Efemp1 PE=1 SV=1	123342	54332.7	140728	79602.1	67070.1	4572.84	94924.4	155362	116441	79718.5	69310.8	54419.6	114420	117073	66899.9	174455	205288	214249	161067	138923
Q9D8Y0;Q9D4J1	5	241.67	Efhd2	0.903905	0.546332	1.8882	0.00696449	1.41486	0.108453	Q9D8Y0|EFHD2_MOUSE EF-hand domain-containing protein D2 OS=Mus musculus GN=Efhd2 PE=1 SV=1	1.22754e+06	1.71324e+06	2.00034e+06	1.92115e+06	1.24831e+06	1.91165e+06	930455	1.79409e+06	1.16382e+06	1.53118e+06	1.22269e+06	1.25915e+06	798793	603525	1.84828e+06	2.41622e+06	2.3377e+06	2.6109e+06	1.70721e+06	1.75195e+06
Q01279	5	194.98	Egfr	1.44102	0.0280265	1.67356	0.00202095	1.02028	0.775301	Q01279|EGFR_MOUSE Epidermal growth factor receptor OS=Mus musculus GN=Egfr PE=1 SV=1	902150	1.0099e+06	789272	957906	1.03447e+06	1.04909e+06	1.40079e+06	1.22475e+06	1.90186e+06	1.18723e+06	842618	1.016e+06	1.07383e+06	877104	790842	1.51792e+06	1.34732e+06	1.92227e+06	1.20556e+06	1.70596e+06
Q99MS7	1	28.62	Ehbp1l1	0.857255	0.18162	0.965011	0.586466	0.954902	0.519828	Q99MS7|EH1L1_MOUSE EH domain-binding protein 1-like protein 1 OS=Mus musculus GN=Ehbp1l1 PE=1 SV=1	42552.9	58948.8	48653.9	56926.9	54303.6	61050.9	42580.6	38155.8	42268	40019.4	50015	61340.9	50528.8	52255.8	59590.5	62187.4	50433.2	48672.6	50851.8	52008.5
Q9WVK4	12	951.23	Ehd1	0.749176	0.00375725	0.947719	0.225888	1.27141	0.00376212	Q9WVK4|EHD1_MOUSE EH domain-containing protein 1 OS=Mus musculus GN=Ehd1 PE=1 SV=1	1.57112e+07	1.58489e+07	1.53177e+07	1.56188e+07	1.25405e+07	1.00313e+07	1.36176e+07	9.89609e+06	1.07436e+07	1.19274e+07	1.18715e+07	1.09008e+07	1.24408e+07	1.31493e+07	1.06565e+07	1.13342e+07	1.12999e+07	1.11856e+07	1.10142e+07	1.10994e+07
Q8BH64	21	1520.62	Ehd2	0.899582	0.0466723	1.0532	0.24999	1.18369	0.00480044	Q8BH64|EHD2_MOUSE EH domain-containing protein 2 OS=Mus musculus GN=Ehd2 PE=1 SV=1	2.94559e+07	3.23494e+07	2.84069e+07	3.09256e+07	2.80783e+07	2.94064e+07	2.79058e+07	2.34997e+07	2.60672e+07	2.7353e+07	2.37839e+07	2.27881e+07	2.56902e+07	2.78218e+07	2.59765e+07	2.59167e+07	2.70683e+07	2.80383e+07	2.44494e+07	2.72945e+07
Q9EQP2;P0C5K0	22	1527.28	Ehd4	1.12896	0.036845	1.36576	0.00023042	1.10501	0.051173	Q9EQP2|EHD4_MOUSE EH domain-containing protein 4 OS=Mus musculus GN=Ehd4 PE=1 SV=1	2.98204e+07	3.36991e+07	3.33361e+07	3.62927e+07	3.09119e+07	3.69112e+07	3.55393e+07	3.32539e+07	3.95107e+07	4.00014e+07	2.87546e+07	2.91874e+07	3.0189e+07	3.24508e+07	2.78874e+07	4.31063e+07	4.39725e+07	4.17972e+07	3.77452e+07	3.6152e+07
Q9DBM2	1	24.46	Ehhadh	0.629313	0.30972	0.517271	0.0170426	0.839046	0.36651	Q9DBM2|ECHP_MOUSE Peroxisomal bifunctional enzyme OS=Mus musculus GN=Ehhadh PE=1 SV=4	7877.24	8396.11	9068.02	5932.99	23167.4	1114.38	11161.2	11847.4	5436.55	4701.44	10562.4	17210.9	16116	13114.5	7881.45	6173.09	2907.49	7029.38	10237.3	7216.03
Q5DW34	1	15.25	Ehmt1	1.07899	0.693315	0.726021	0.267356	0.820822	0.452663	Q5DW34|EHMT1_MOUSE Histone-lysine N-methyltransferase EHMT1 OS=Mus musculus GN=Ehmt1 PE=1 SV=2	226499	287724	152880	187987	154482	138179	322003	198815	211212	219105	254955	279128	326167	254203	115499	74460	95271.9	169949	244030	309259
Q8BMJ3	1	29.99	Eif1ax	0.776158	0.381785	1.21621	0.431762	1.27798	0.243775	Q8BMJ3|IF1AX_MOUSE Eukaryotic translation initiation factor 1A, X-chromosomal OS=Mus musculus GN=Eif1ax PE=2 SV=3	1.41481e+06	1.93757e+06	2.66624e+06	1.52208e+06	1.26247e+06	754393	1.14278e+06	2.69213e+06	965578	1.27776e+06	1.20309e+06	1.13409e+06	1.10424e+06	891694	2.55522e+06	1.7858e+06	2.40512e+06	1.38081e+06	1.50788e+06	1.29805e+06
Q9CXU9	2	167.74	Eif1b	0.7421	0.120848	1.27132	0.0227971	1.37963	0.0337099	Q9CXU9|EIF1B_MOUSE Eukaryotic translation initiation factor 1b OS=Mus musculus GN=Eif1b PE=1 SV=2	2.06468e+06	2.86112e+06	3.00775e+06	3.38976e+06	2.47894e+06	3.38758e+06	1.48962e+06	1.83723e+06	1.8702e+06	1.65803e+06	2.16797e+06	2.16707e+06	1.5535e+06	1.60145e+06	2.5143e+06	2.64394e+06	2.63368e+06	2.38273e+06	2.63517e+06	2.42315e+06
Q8BJW6	2	44.57	Eif2a	1.53017	0.274676	5.55994	0.00327743	2.13706	0.175652	Q8BJW6|EIF2A_MOUSE Eukaryotic translation initiation factor 2A OS=Mus musculus GN=Eif2a PE=1 SV=2	16838.4	38739.3	15436.8	52642.5	88931.5	117146	65497.4	54747.9	46805.8	41099.9	37060.8	20932.2	16522.1	21740.4	3221.54	148514	150805	120575	98332.5	34860.3
Q6ZWX6	8	383.16	Eif2s1	1.06127	0.320646	1.20147	0.00492836	1.03125	0.583518	Q6ZWX6|IF2A_MOUSE Eukaryotic translation initiation factor 2 subunit 1 OS=Mus musculus GN=Eif2s1 PE=1 SV=3	2.00181e+06	2.23545e+06	2.31008e+06	2.21797e+06	1.91674e+06	2.06e+06	2.01737e+06	2.31145e+06	2.47263e+06	2.47505e+06	2.1212e+06	1.96404e+06	2.38723e+06	2.04292e+06	1.84296e+06	2.59354e+06	2.56681e+06	2.32369e+06	2.36936e+06	2.59185e+06
Q99L45	4	156.15	Eif2s2	1.39603	0.0867667	1.27926	0.146804	0.789529	0.162093	Q99L45|IF2B_MOUSE Eukaryotic translation initiation factor 2 subunit 2 OS=Mus musculus GN=Eif2s2 PE=1 SV=1	246578	331148	385683	411024	607240	484763	485462	517453	766799	512000	600019	546685	526772	480154	356313	761176	856811	571214	607200	414459
Q9Z0N1	5	202.44	Eif2s3x	1.23798	0.0270269	1.2813	0.0064555	1.03166	0.753699	Q9Z0N1|IF2G_MOUSE Eukaryotic translation initiation factor 2 subunit 3, X-linked OS=Mus musculus GN=Eif2s3x PE=1 SV=2	883820	857304	960371	963905	664991	940624	995003	1.05652e+06	1.24947e+06	1.11934e+06	868472	782921	897863	906788	741463	1.21343e+06	888238	1.03197e+06	1.15038e+06	1.09426e+06
P23116	4	179.87	Eif3a	0.947223	0.704918	1.03396	0.781123	1.10133	0.491949	P23116|EIF3A_MOUSE Eukaryotic translation initiation factor 3 subunit A OS=Mus musculus GN=Eif3a PE=1 SV=5	169632	216259	248839	218644	153788	247820	222995	190756	159675	132761	113850	174730	203065	204717	218130	172492	158811	217566	208598	188084
Q8JZQ9	4	183.87	Eif3b	1.22451	0.119973	1.4278	0.000234327	1.10832	0.148007	Q8JZQ9|EIF3B_MOUSE Eukaryotic translation initiation factor 3 subunit B OS=Mus musculus GN=Eif3b PE=1 SV=1	593725	625444	794946	717734	608909	770980	768732	581371	1.02265e+06	947044	587312	577249	653274	622785	573641	923053	719084	927290	881842	852499
Q8R1B4	5	207.85	Eif3c	1.22109	0.15377	1.08712	0.385705	0.913689	0.357991	Q8R1B4|EIF3C_MOUSE Eukaryotic translation initiation factor 3 subunit C OS=Mus musculus GN=Eif3c PE=1 SV=1	562427	646572	635106	558586	612944	489511	881147	621218	751067	939414	584579	545593	797881	768042	604411	663744	649408	663501	809199	802202
O70194	2	76.41	Eif3d	1.44855	0.130649	1.36239	0.0348629	0.913526	0.609085	O70194|EIF3D_MOUSE Eukaryotic translation initiation factor 3 subunit D OS=Mus musculus GN=Eif3d PE=1 SV=2	148718	182795	119064	147314	81895.5	224446	210356	116561	138076	295267	130486	161306	148326	205131	98886.1	228129	160784	222327	207903	194657
P60229	2	38.15	Eif3e	1.10875	0.571519	1.61728	0.0444663	1.37599	0.214048	P60229|EIF3E_MOUSE Eukaryotic translation initiation factor 3 subunit E OS=Mus musculus GN=Eif3e PE=1 SV=1	191414	123485	169916	86639.4	98202.4	167986	146939	114494	122599	190466	42477.7	80225.6	141189	110377	112402	103523	134343	212017	183483	153716
Q9DCH4	3	336.21	Eif3f	1.71752	0.0172061	0.649947	0.00346834	0.489069	0.000227232	Q9DCH4|EIF3F_MOUSE Eukaryotic translation initiation factor 3 subunit F OS=Mus musculus GN=Eif3f PE=1 SV=2	622712	849837	688153	944544	785562	2.01415e+06	1.15469e+06	989805	1.31874e+06	1.20516e+06	1.23512e+06	1.35307e+06	1.7995e+06	1.62983e+06	1.93801e+06	1.00805e+06	923674	1.04093e+06	1.1099e+06	1.08813e+06
Q9Z1D1	3	173.88	Eif3g	0.841469	0.177434	1.21698	0.0462954	1.03006	0.63309	Q9Z1D1|EIF3G_MOUSE Eukaryotic translation initiation factor 3 subunit G OS=Mus musculus GN=Eif3g PE=1 SV=2	1.34408e+06	1.66129e+06	1.51725e+06	1.40057e+06	1.50211e+06	1.18934e+06	702519	1.57151e+06	1.38463e+06	1.40017e+06	1.50162e+06	1.46742e+06	1.51899e+06	1.15564e+06	1.56495e+06	2.01626e+06	1.96647e+06	1.66651e+06	1.40353e+06	1.71999e+06
Q91WK2	4	163.54	Eif3h	0.955592	0.587406	1.17868	0.0140546	1.02977	0.542034	Q91WK2|EIF3H_MOUSE Eukaryotic translation initiation factor 3 subunit H OS=Mus musculus GN=Eif3h PE=1 SV=1	753009	726216	775855	714176	628535	592837	539370	751703	787141	766970	690285	691809	746090	642820	722760	872136	900260	872491	740133	733014
Q9QZD9	4	190.31	Eif3i	1.20266	0.14962	1.06538	0.336786	0.989742	0.847552	Q9QZD9|EIF3I_MOUSE Eukaryotic translation initiation factor 3 subunit I OS=Mus musculus GN=Eif3i PE=1 SV=1	1.14072e+06	1.0514e+06	1.35405e+06	1.613e+06	987894	1.65552e+06	1.18946e+06	1.25639e+06	1.58258e+06	1.70886e+06	1.32064e+06	1.37389e+06	1.01053e+06	1.19552e+06	1.3102e+06	1.42232e+06	1.16389e+06	1.30475e+06	1.4059e+06	1.32001e+06
Q3UGC7	9	400.21	Eif3j1	0.994852	0.957828	1.17442	0.0608681	1.01456	0.817769	Q3UGC7|EI3JA_MOUSE Eukaryotic translation initiation factor 3 subunit J-A OS=Mus musculus GN=Eif3j1 PE=2 SV=1	3.83585e+06	5.09341e+06	4.54507e+06	4.40158e+06	4.15524e+06	5.56048e+06	3.33299e+06	4.57621e+06	4.21853e+06	4.22953e+06	4.61139e+06	4.40749e+06	3.98149e+06	3.3956e+06	5.31897e+06	5.38925e+06	5.31347e+06	5.23501e+06	4.71579e+06	4.84901e+06
Q99JX4	2	76.34	Eif3m	2.83388	1.28621e-05	0.70041	0.0112202	0.516718	0.000447304	Q99JX4|EIF3M_MOUSE Eukaryotic translation initiation factor 3 subunit M OS=Mus musculus GN=Eif3m PE=1 SV=1	236354	191956	192086	287269	329964	604032	686384	651372	837419	728085	486361	448478	427180	570233	462919	312116	325430	217764	403211	419082
P60843	4	641.86	Eif4a1	1.36883	0.00461903	1.16139	0.0774225	0.982779	0.820678	P60843|IF4A1_MOUSE Eukaryotic initiation factor 4A-I OS=Mus musculus GN=Eif4a1 PE=1 SV=1	1.60282e+06	2.00584e+06	1.40654e+06	1.71109e+06	1.48194e+06	2.60037e+06	2.12465e+06	1.90232e+06	2.30551e+06	2.30284e+06	1.39239e+06	1.81909e+06	1.57205e+06	1.89282e+06	1.67571e+06	2.00788e+06	1.60555e+06	2.1757e+06	1.8475e+06	2.06334e+06
P10630	5	682.75	Eif4a2	1.14904	0.329405	0.96985	0.552404	1.05088	0.667554	P10630|IF4A2_MOUSE Eukaryotic initiation factor 4A-II OS=Mus musculus GN=Eif4a2 PE=1 SV=2	3.17502e+06	3.43024e+06	3.32199e+06	2.46777e+06	2.31896e+06	4.67673e+06	3.37013e+06	2.51473e+06	3.15161e+06	3.19374e+06	2.61093e+06	2.73714e+06	3.03922e+06	3.03431e+06	2.58001e+06	2.57488e+06	2.44249e+06	2.82227e+06	2.77748e+06	2.96234e+06
Q8BGD9	5	297.37	Eif4b	0.698372	0.00386591	1.25132	0.0474063	1.35137	0.00767574	Q8BGD9|IF4B_MOUSE Eukaryotic translation initiation factor 4B OS=Mus musculus GN=Eif4b PE=1 SV=1	1.90277e+06	2.52722e+06	2.13772e+06	2.37755e+06	2.02928e+06	1.59807e+06	1.43299e+06	1.93906e+06	1.21365e+06	1.48054e+06	1.80002e+06	1.75014e+06	1.37588e+06	1.34525e+06	1.84976e+06	2.19745e+06	2.4141e+06	2.06883e+06	1.85728e+06	1.62437e+06
P63073	1	17.54	Eif4e	#DIV/0!	0.346594	#DIV/0!	#DIV/0!	#DIV/0!	0.9995	P63073|IF4E_MOUSE Eukaryotic translation initiation factor 4E OS=Mus musculus GN=Eif4e PE=1 SV=1	0	0	0	0	0	234152	0	0	0	0	0	0	0	0	0	0	0	0	0	0
Q60876	1	27.57	Eif4ebp1	0.529794	0.0450249	0.921114	0.750273	1.42387	0.229989	Q60876|4EBP1_MOUSE Eukaryotic translation initiation factor 4E-binding protein 1 OS=Mus musculus GN=Eif4ebp1 PE=1 SV=3	89074.6	193038	141601	216368	87061.3	95628	58028.9	112175	68835	50569.4	104235	180165	45676	91504.3	89101.2	67051.6	87721.7	84071.8	132890	98660.8
Q6NZJ6	3	140.93	Eif4g1	1.11003	0.48874	1.32531	0.0133562	1.20505	0.337003	Q6NZJ6|IF4G1_MOUSE Eukaryotic translation initiation factor 4 gamma 1 OS=Mus musculus GN=Eif4g1 PE=1 SV=1	365226	366578	335381	234643	190340	373338	233468	314131	352714	382707	248903	299066	256220	160104	273972	308726	342409	355828	329635	304493
Q62448	1	30.66	Eif4g2	0.944204	0.851657	1.25603	0.346566	1.13925	0.374827	Q62448|IF4G2_MOUSE Eukaryotic translation initiation factor 4 gamma 2 OS=Mus musculus GN=Eif4g2 PE=1 SV=2	32284.7	37118.8	26347.3	24035.7	31847.9	0	28273	23547.4	45184.6	46168.8	14854.4	21817.5	28042.7	25876.3	42509.7	31904.2	17069.8	48893.3	34287.3	35023.7
Q80XI3	1	44.01	Eif4g3	1.7604	0.010443	0.763239	0.0311791	0.66825	0.0227547	Q80XI3|IF4G3_MOUSE Eukaryotic translation initiation factor 4 gamma 3 OS=Mus musculus GN=Eif4g3 PE=1 SV=2	49649.8	95819.3	58030.3	83376	44515.7	161492	109251	97332.4	105692	109613	86998.8	117107	101465	89747.6	100590	72206	55847.6	72494.6	77031.9	100917
Q9WUK2	6	315.65	Eif4h	0.729112	0.0165403	1.16399	0.153533	1.15863	0.207291	Q9WUK2|IF4H_MOUSE Eukaryotic translation initiation factor 4H OS=Mus musculus GN=Eif4h PE=1 SV=3	3.47728e+06	4.41417e+06	4.30916e+06	5.37456e+06	5.16008e+06	3.51944e+06	2.49544e+06	3.8715e+06	3.44785e+06	3.2423e+06	4.87019e+06	4.2593e+06	3.60506e+06	3.15843e+06	3.72946e+06	5.52563e+06	4.68334e+06	4.19949e+06	4.59365e+06	3.83828e+06
P59325	2	58.55	Eif5	1.00533	0.951655	1.3229	0.0815512	1.26203	0.0577475	P59325|IF5_MOUSE Eukaryotic translation initiation factor 5 OS=Mus musculus GN=Eif5 PE=1 SV=1	320274	256110	370452	286020	238925	273880	297153	316341	313774	278483	219113	266337	241093	182702	256958	348470	314740	407334	202654	269576
P63242;Q8BGY2	13	1048.73	Eif5a	0.996026	0.951447	0.957442	0.579635	0.966484	0.688906	P63242|IF5A1_MOUSE Eukaryotic translation initiation factor 5A-1 OS=Mus musculus GN=Eif5a PE=1 SV=2	3.76342e+07	4.49715e+07	3.82007e+07	4.80458e+07	4.35385e+07	4.91357e+07	3.89582e+07	4.04744e+07	4.24294e+07	4.0549e+07	4.39067e+07	4.63221e+07	3.99406e+07	3.72049e+07	5.23817e+07	4.21726e+07	3.7329e+07	3.88556e+07	4.79737e+07	4.40727e+07
O55135	2	80.56	Eif6	0.61574	0.0153794	1.5098	0.0470711	1.42145	0.0625523	O55135|IF6_MOUSE Eukaryotic translation initiation factor 6 OS=Mus musculus GN=Eif6 PE=1 SV=2	214333	356359	215391	281581	207936	115032	148005	145371	192382	184648	112302	237808	198293	153385	195607	307142	190967	274172	370996	211613
P70372	4	111.76	Elavl1	0.96166	0.443814	1.18794	0.0130896	0.95368	0.251482	P70372|ELAV1_MOUSE ELAV-like protein 1 OS=Mus musculus GN=Elavl1 PE=1 SV=2	793089	940467	939136	978104	904807	885802	774569	893357	958312	868901	988571	989655	955004	904038	939598	1.20761e+06	1.22946e+06	1.12947e+06	928633	1.17948e+06
Q8BYZ7	1	18.13	Elmo3	1.33681	0.116301	0.678195	0.185168	1.06311	0.846751	Q8BYZ7|ELMO3_MOUSE Engulfment and cell motility protein 3 OS=Mus musculus GN=Elmo3 PE=1 SV=2	117896	95006.9	54910.3	66731.2	57086.9	127155	113310	78939.6	90758.4	113375	68796.2	64011.1	66864.1	63098.7	105614	26436	25843.8	28461.9	78895.1	90199.4
Q9CRD2	1	82.59	Emc2	1.0172	0.806564	1.35634	0.0811765	1.13502	0.291689	Q9CRD2|EMC2_MOUSE ER membrane protein complex subunit 2 OS=Mus musculus GN=Emc2 PE=1 SV=1	146669	141764	131181	162299	119293	160370	124085	135103	144191	149517	134544	101356	118442	85257.2	178191	205193	194763	166303	151364	120312
Q9EP72	1	31.01	Emc7	0.894206	0.533382	1.65241	0.0883145	1.4665	0.0368445	Q9EP72|EMC7_MOUSE ER membrane protein complex subunit 7 OS=Mus musculus GN=Emc7 PE=1 SV=1	92901.7	204705	122834	118017	151655	160200	94217.6	102419	126233	134033	87623.3	106856	100186	92843.9	83074.7	202215	192085	208092	133211	41997.4
O70378	1	33.16	Emc8	1.1425	0.314716	1.18818	0.433843	0.965018	0.809484	O70378|EMC8_MOUSE ER membrane protein complex subunit 8 OS=Mus musculus GN=Emc8 PE=1 SV=1	64238	73002.1	68577.2	88343.4	90665	119139	72222	75416.6	77959.3	94926.3	104998	109262	32645.1	47981.5	103889	120335	96397.2	69139.9	95020	92925.5
Q05BC3	6	235.53	Eml1	0.908199	0.168195	1.03995	0.646967	0.91411	0.255131	Q05BC3|EMAL1_MOUSE Echinoderm microtubule-associated protein-like 1 OS=Mus musculus GN=Eml1 PE=1 SV=1	1.41308e+06	1.42962e+06	1.60878e+06	1.72276e+06	1.62205e+06	1.29409e+06	1.19962e+06	1.46279e+06	1.58022e+06	1.54388e+06	1.51687e+06	1.59986e+06	1.87198e+06	2.02063e+06	1.51949e+06	1.75196e+06	1.72358e+06	1.85531e+06	2.07931e+06	1.45935e+06
Q7TNG5	2	83.28	Eml2	1.18921	0.0102263	1.15234	0.190985	0.996447	0.909797	Q7TNG5|EMAL2_MOUSE Echinoderm microtubule-associated protein-like 2 OS=Mus musculus GN=Eml2 PE=1 SV=1	740548	687695	764148	604693	757988	829534	772765	836242	848541	940630	480933	706005	813877	881625	685310	779293	885562	888587	713705	844101
O08600	7	256.47	Endog	0.809606	0.0551789	1.21064	0.0284872	1.22395	0.0292439	O08600|NUCG_MOUSE Endonuclease G, mitochondrial OS=Mus musculus GN=Endog PE=1 SV=1	2.32248e+06	2.55028e+06	2.461e+06	2.55872e+06	2.42802e+06	1.33953e+06	1.90566e+06	1.96473e+06	2.60446e+06	2.16038e+06	2.27997e+06	2.38317e+06	2.00203e+06	1.86909e+06	1.53195e+06	2.47843e+06	2.2697e+06	2.47689e+06	2.41034e+06	2.55117e+06
P17182	17	2543.94	Eno1	1.13091	0.0642527	1.17683	1.33875e-05	1.04854	0.0798831	P17182|ENOA_MOUSE Alpha-enolase OS=Mus musculus GN=Eno1 PE=1 SV=3	9.42088e+07	9.60726e+07	1.01271e+08	1.06247e+08	9.63587e+07	1.30528e+08	1.04594e+08	9.70807e+07	1.11388e+08	1.15258e+08	9.24874e+07	9.5138e+07	9.64602e+07	9.28193e+07	9.43792e+07	1.16499e+08	1.08754e+08	1.10154e+08	1.07146e+08	1.12067e+08
P21550	21	3061.89	Eno3	0.957587	0.322114	1.07591	0.0534618	1.07778	0.0536439	P21550|ENOB_MOUSE Beta-enolase OS=Mus musculus GN=Eno3 PE=1 SV=3	5.12124e+08	5.48092e+08	5.92488e+08	5.4126e+08	5.3156e+08	5.5734e+08	4.83649e+08	4.79242e+08	5.2956e+08	5.60134e+08	5.27825e+08	4.93599e+08	5.31042e+08	5.06833e+08	4.69531e+08	5.76031e+08	5.22222e+08	5.64924e+08	5.48423e+08	5.09199e+08
Q8BHR2	1	17.98	Enox1	0.331605	0.00106484	1.93109	0.0242558	1.89957	0.00553561	Q8BHR2|ENOX1_MOUSE Ecto-NOX disulfide-thiol exchanger 1 OS=Mus musculus GN=Enox1 PE=2 SV=1	4.75912e+07	5.93706e+07	5.31217e+07	8.84548e+07	8.90663e+07	1.95257e+07	2.41145e+07	2.65323e+07	1.70736e+07	2.47053e+07	2.74645e+07	2.98994e+07	3.22611e+07	3.83691e+07	4.97331e+07	8.77911e+07	9.55637e+07	7.38015e+07	5.02744e+07	3.57762e+07
P60840	1	35.29	Ensa	0.384347	0.0513121	2.49227	0.0130757	2.90488	0.0432786	P60840|ENSA_MOUSE Alpha-endosulfine OS=Mus musculus GN=Ensa PE=1 SV=1	36918.9	249451	145535	197104	108479	71188.3	50216.9	109273	25395.4	27377.2	93837.5	42244	67061	20178.9	30557.4	110673	132628	138726	186206	64501.2
P48193	7	289.07	Epb41	0.978157	0.824828	1.18277	0.25095	1.06863	0.365072	P48193|41_MOUSE Protein 4.1 OS=Mus musculus GN=Epb41 PE=1 SV=2	1.80562e+06	2.00514e+06	2.25197e+06	1.94614e+06	1.71548e+06	2.24861e+06	1.98381e+06	1.29557e+06	2.05994e+06	1.92401e+06	1.62103e+06	1.80449e+06	1.66614e+06	1.81489e+06	2.19331e+06	1.63727e+06	2.05327e+06	3.09428e+06	1.87448e+06	2.10377e+06
O70318	2	59.79	Epb41l2	0.868679	0.324455	1.28735	0.00843484	1.06994	0.179636	O70318|E41L2_MOUSE Band 4.1-like protein 2 OS=Mus musculus GN=Epb41l2 PE=1 SV=2	217903	225871	239356	266165	246064	115747	174504	234252	230789	283091	217393	215706	229899	208056	246172	286801	339774	303968	235345	272366
Q9D379	1	32.98	Ephx1	1.63914	0.444464	2.96775	0.0718158	0.72749	0.882997	Q9D379|HYEP_MOUSE Epoxide hydrolase 1 OS=Mus musculus GN=Ephx1 PE=1 SV=2	22151	23535.6	14865.8	18738.6	15167.8	67306.9	7990.82	66995.9	0	12537.9	9005.12	6355.93	46941.2	38004.7	29535.1	36128.1	141931	95960.6	98773.1	12545.9
P34914	18	971.83	Ephx2	0.927302	0.286629	0.82746	0.00407645	0.96339	0.3815	P34914|HYES_MOUSE Bifunctional epoxide hydrolase 2 OS=Mus musculus GN=Ephx2 PE=1 SV=2	3.89881e+07	3.30169e+07	3.35766e+07	3.57264e+07	3.63855e+07	3.28935e+07	3.98911e+07	2.74361e+07	3.20759e+07	3.24792e+07	3.69594e+07	3.92019e+07	3.55881e+07	3.88599e+07	3.3837e+07	3.13553e+07	2.61658e+07	3.0831e+07	3.04027e+07	3.38671e+07
Q8CGC7	15	704.29	Eprs	1.23775	0.10101	0.993521	0.923549	0.948452	0.490119	Q8CGC7|SYEP_MOUSE Bifunctional glutamate/proline--tRNA ligase OS=Mus musculus GN=Eprs PE=1 SV=4	5.67942e+06	3.90275e+06	4.11651e+06	4.94989e+06	4.9982e+06	4.39653e+06	6.30171e+06	5.25682e+06	5.84714e+06	7.46658e+06	4.79182e+06	4.75409e+06	4.73213e+06	5.89224e+06	4.7617e+06	5.31482e+06	4.82166e+06	4.12092e+06	5.06147e+06	5.45158e+06
Q60902	2	131.04	Eps15l1	0.456422	0.00718615	1.06204	0.721086	1.0579	0.686844	Q60902|EP15R_MOUSE Epidermal growth factor receptor substrate 15-like 1 OS=Mus musculus GN=Eps15l1 PE=1 SV=3	214540	370496	240658	335976	354488	32242.4	92294.4	200735	206410	160325	315966	350832	176470	198095	391816	394051	289074	287023	279416	272529
Q8C460	1	33.32	Eri3	3.47929	0.020943	1.22054	0.547612	0.396904	0.276942	Q8C460|ERI3_MOUSE ERI1 exoribonuclease 3 OS=Mus musculus GN=Eri3 PE=1 SV=1	29092.9	0	9967.43	27104.4	23283.7	43992.5	65099.7	24640.5	111177	66307.7	51617.8	67255.7	24409.8	5037.46	77044.4	50626.5	48207	59194.9	32838.6	84199.9
Q8BFZ9	1	54.13	Erlin2	1.13767	0.41688	0.830701	0.0122723	0.876123	0.258228	Q8BFZ9|ERLN2_MOUSE Erlin-2 OS=Mus musculus GN=Erlin2 PE=1 SV=1	259969	177387	113184	199998	164192	146416	199223	217804	239329	237890	215407	206343	222194	201654	198468	177891	180291	135658	177276	196190
P57759	4	110.89	Erp29	0.943111	0.450833	1.47442	0.00588249	1.18119	0.160377	P57759|ERP29_MOUSE Endoplasmic reticulum resident protein 29 OS=Mus musculus GN=Erp29 PE=1 SV=2	997558	1.09302e+06	1.15772e+06	1.01557e+06	1.01327e+06	1.04771e+06	856839	808548	1.10002e+06	1.16381e+06	1.01622e+06	979768	701216	608140	1.16232e+06	1.48493e+06	1.33926e+06	1.31329e+06	1.24777e+06	1.20198e+06
Q9D1Q6	1	96.39	Erp44	1.00045	0.995541	1.22827	0.0734496	1.19768	0.0743729	Q9D1Q6|ERP44_MOUSE Endoplasmic reticulum resident protein 44 OS=Mus musculus GN=Erp44 PE=1 SV=1	125126	91149.9	100086	129489	123524	129357	111814	103058	115826	109575	110746	86049.9	84382.9	94949.2	99272.5	131313	145271	98926.8	111447	96963
Q9R0P3	6	413.2	Esd	1.03308	0.377686	0.927349	0.158817	0.975084	0.563594	Q9R0P3|ESTD_MOUSE S-formylglutathione hydrolase OS=Mus musculus GN=Esd PE=1 SV=1	1.26925e+07	1.23622e+07	1.21808e+07	1.23366e+07	1.32952e+07	1.31925e+07	1.24148e+07	1.17569e+07	1.37684e+07	1.38146e+07	1.21711e+07	1.19812e+07	1.293e+07	1.46313e+07	1.27599e+07	1.32207e+07	1.11121e+07	1.12737e+07	1.22681e+07	1.1915e+07
Q8BWY3	4	176.99	Etf1	1.06418	0.585908	1.14616	0.11795	0.924436	0.291947	Q8BWY3|ERF1_MOUSE Eukaryotic peptide chain release factor subunit 1 OS=Mus musculus GN=Etf1 PE=1 SV=4	479234	493893	485142	564664	483671	337429	532740	529288	618551	649464	529696	477115	663254	548428	493002	658256	714968	554905	551609	628072
Q99LC5	26	2316.94	Etfa	0.948319	0.206373	0.841954	0.000541779	0.876089	0.00472059	Q99LC5|ETFA_MOUSE Electron transfer flavoprotein subunit alpha, mitochondrial OS=Mus musculus GN=Etfa PE=1 SV=2	8.2346e+08	7.49861e+08	8.63952e+08	8.24828e+08	8.01545e+08	8.52464e+08	7.08187e+08	7.87867e+08	7.61244e+08	7.4387e+08	9.81398e+08	9.54647e+08	9.46808e+08	9.04542e+08	8.50999e+08	8.30345e+08	7.59584e+08	7.85359e+08	7.73559e+08	7.56467e+08
Q9DCW4	21	1766.35	Etfb	1.01356	0.816505	0.841287	0.00137476	0.882159	0.00877119	Q9DCW4|ETFB_MOUSE Electron transfer flavoprotein subunit beta OS=Mus musculus GN=Etfb PE=1 SV=3	6.435e+08	5.90473e+08	6.65904e+08	6.12866e+08	6.07184e+08	7.57923e+08	5.7972e+08	5.95736e+08	6.3331e+08	5.95547e+08	7.66105e+08	7.11786e+08	7.32724e+08	6.49418e+08	6.76663e+08	6.26172e+08	5.82725e+08	6.12872e+08	5.92185e+08	5.61421e+08
Q921G7	34	2380.8	Etfdh	0.982298	0.847431	0.63656	0.000212311	0.857071	0.0280069	Q921G7|ETFD_MOUSE Electron transfer flavoprotein-ubiquinone oxidoreductase, mitochondrial OS=Mus musculus GN=Etfdh PE=1 SV=1	3.46181e+08	3.00534e+08	2.86546e+08	3.2269e+08	3.47002e+08	2.92279e+08	4.09448e+08	3.29396e+08	2.73034e+08	2.7042e+08	3.88164e+08	3.91727e+08	3.48286e+08	4.14557e+08	3.27535e+08	2.33903e+08	2.08861e+08	2.08885e+08	2.55425e+08	2.83465e+08
Q91V16	1	28.51	Etfrf1	0.977484	0.831211	0.93552	0.661442	1.09834	0.483643	Q91V16|ETFR1_MOUSE Electron transfer flavoprotein regulatory factor 1 OS=Mus musculus GN=Etfrf1 PE=1 SV=1	281378	292873	352666	399204	250958	265950	323393	274043	311903	366282	385297	285570	339158	190437	235413	234460	350684	244023	253128	260996
Q9DCM0	8	218.49	Ethe1	0.944358	0.0671686	0.810602	0.000658623	0.957285	0.14835	Q9DCM0|ETHE1_MOUSE Persulfide dioxygenase ETHE1, mitochondrial OS=Mus musculus GN=Ethe1 PE=1 SV=2	6.31249e+06	6.12352e+06	6.40681e+06	6.43479e+06	6.8839e+06	5.68978e+06	6.16368e+06	5.95397e+06	6.26407e+06	6.30048e+06	7.18589e+06	6.40417e+06	6.62008e+06	6.7916e+06	6.59484e+06	5.93278e+06	5.19934e+06	4.96192e+06	5.24785e+06	5.89157e+06
Q61545	1	28.66	Ewsr1	0.683005	0.0850237	1.07543	0.436469	1.15366	0.392686	Q61545|EWS_MOUSE RNA-binding protein EWS OS=Mus musculus GN=Ewsr1 PE=1 SV=2	452931	556161	454231	848851	498169	327840	393645	581256	286400	330338	491442	633939	454131	443897	412616	570809	500231	568768	529370	450589
P26040	4	762.33	Ezr	0.845618	0.104817	1.25826	0.000353871	1.23302	0.0383286	P26040|EZRI_MOUSE Ezrin OS=Mus musculus GN=Ezr PE=1 SV=3	1.07014e+06	1.40061e+06	1.3262e+06	1.61009e+06	1.12738e+06	1.0198e+06	1.0272e+06	1.10417e+06	1.07058e+06	1.30387e+06	1.08377e+06	1.17737e+06	1.04807e+06	964845	1.02547e+06	1.44422e+06	1.26232e+06	1.30944e+06	1.32953e+06	1.3227e+06
Q80YC5	2	104.53	F12	1.85246	0.0294872	1.714	0.00682988	0.69534	0.0696081	Q80YC5|FA12_MOUSE Coagulation factor XII OS=Mus musculus GN=F12 PE=1 SV=2	54714.1	42159.8	63247.3	55619.3	81014.5	43420.5	124255	132943	145963	103144	74807.6	87045.8	57092.4	80450.9	127380	122034	165855	183895	135100	124610
Q8BH61	6	233.75	F13a1	1.64833	0.0193367	1.43769	0.00210912	0.971021	0.713378	Q8BH61|F13A_MOUSE Coagulation factor XIII A chain OS=Mus musculus GN=F13a1 PE=1 SV=3	1.51478e+06	997272	1.2786e+06	1.1767e+06	971071	2.88169e+06	1.87446e+06	1.4302e+06	1.8543e+06	1.74782e+06	1.11972e+06	1.05886e+06	1.32087e+06	1.19523e+06	1.42097e+06	2.08028e+06	1.80214e+06	1.81737e+06	1.57761e+06	1.515e+06
P19221	8	271.24	F2	1.32905	0.098029	1.68765	0.00104851	1.15633	0.184874	P19221|THRB_MOUSE Prothrombin OS=Mus musculus GN=F2 PE=1 SV=1	1.95567e+06	1.9349e+06	2.07473e+06	1.52424e+06	1.54419e+06	1.71591e+06	2.26031e+06	2.01507e+06	3.44516e+06	2.56981e+06	1.38896e+06	1.47046e+06	1.24932e+06	1.7315e+06	1.97216e+06	2.41238e+06	2.44754e+06	3.29423e+06	2.65899e+06	2.37149e+06
P11404	18	1499.73	Fabp3	0.828812	0.292991	0.642641	0.000371728	0.8861	0.331683	P11404|FABPH_MOUSE Fatty acid-binding protein, heart OS=Mus musculus GN=Fabp3 PE=1 SV=5	2.56392e+09	1.88467e+09	2.93434e+09	1.89031e+09	1.37283e+09	1.84076e+09	1.71772e+09	2.34246e+09	1.61202e+09	1.31064e+09	2.4082e+09	2.62574e+09	2.238e+09	1.99863e+09	2.74397e+09	1.42397e+09	1.52076e+09	1.66998e+09	1.69372e+09	1.41261e+09
P04117;O08716	9	693.27	Fabp4	0.820293	0.08829	0.892908	0.0875093	1.13631	0.130059	P04117|FABP4_MOUSE Fatty acid-binding protein, adipocyte OS=Mus musculus GN=Fabp4 PE=1 SV=3	2.55696e+08	2.60163e+08	2.97331e+08	3.22293e+08	2.4486e+08	3.08353e+08	1.91878e+08	2.00085e+08	2.19567e+08	2.12403e+08	2.52569e+08	2.66473e+08	2.26408e+08	2.00118e+08	2.69189e+08	2.20795e+08	2.17527e+08	2.15908e+08	2.07808e+08	2.2263e+08
Q05816	7	463.96	Fabp5	0.659765	0.0206235	1.06734	0.403744	1.33464	0.0584884	Q05816|FABP5_MOUSE Fatty acid-binding protein, epidermal OS=Mus musculus GN=Fabp5 PE=1 SV=3	8.35293e+06	1.1341e+07	1.16687e+07	1.52415e+07	9.04393e+06	7.89428e+06	5.37864e+06	8.40693e+06	7.55071e+06	7.48408e+06	8.53623e+06	9.56098e+06	6.92944e+06	7.29087e+06	9.37764e+06	9.70779e+06	9.25496e+06	8.23996e+06	9.38493e+06	7.91518e+06
Q61160	3	165.53	Fadd	1.09315	0.215706	1.08416	0.463989	0.926598	0.359909	Q61160|FADD_MOUSE FAS-associated death domain protein OS=Mus musculus GN=Fadd PE=1 SV=1	1.96046e+06	1.44212e+06	1.78671e+06	1.73046e+06	1.96551e+06	2.03245e+06	2.00603e+06	1.65023e+06	1.93339e+06	2.09085e+06	1.7663e+06	1.61669e+06	1.92392e+06	2.12981e+06	2.1524e+06	1.93017e+06	1.95045e+06	2.79132e+06	1.97875e+06	1.74542e+06
P54731	1	21.13	Faf1	0.498872	0.0643489	0.565775	0.0447259	0.534295	0.0315928	P54731|FAF1_MOUSE FAS-associated factor 1 OS=Mus musculus GN=Faf1 PE=1 SV=2	135739	127158	45251	104169	130911	27816.9	20550.8	44531.3	50763.3	127339	165567	223061	280369	226312	121410	71077.4	211221	84272.2	93406.2	115258
P35505	6	239.27	Fah	0.883128	0.220369	0.729444	0.00893161	0.965098	0.747292	P35505|FAAA_MOUSE Fumarylacetoacetase OS=Mus musculus GN=Fah PE=1 SV=2	2.47638e+06	1.60592e+06	1.79014e+06	2.16031e+06	1.83904e+06	1.83346e+06	1.79441e+06	1.5777e+06	1.54476e+06	1.9677e+06	1.94129e+06	1.55964e+06	2.17322e+06	2.07532e+06	2.47932e+06	1.71236e+06	1.39736e+06	1.43313e+06	1.5083e+06	1.41017e+06
Q8R0F8	2	211.3	Fahd1	1.06568	0.7161	0.903268	0.290663	1.07239	0.772538	Q8R0F8|FAHD1_MOUSE Acylpyruvase FAHD1, mitochondrial OS=Mus musculus GN=Fahd1 PE=1 SV=2	2.87269e+06	2.61541e+06	3.36941e+06	5.27323e+06	2.65938e+06	3.42137e+06	3.23531e+06	2.94386e+06	4.74573e+06	3.54666e+06	3.55366e+06	3.42396e+06	3.47373e+06	2.2697e+06	2.93566e+06	2.56762e+06	2.56724e+06	2.93855e+06	3.17293e+06	2.89588e+06
Q3TC72	9	563.79	Fahd2	0.834953	0.0106544	0.774956	0.000397273	1.05765	0.221286	Q3TC72|FAHD2_MOUSE Fumarylacetoacetate hydrolase domain-containing protein 2A OS=Mus musculus GN=Fahd2 PE=1 SV=1	1.29455e+07	1.24019e+07	1.17303e+07	1.14793e+07	1.14867e+07	1.11311e+07	1.12895e+07	8.86917e+06	9.97454e+06	8.86928e+06	1.23323e+07	1.17673e+07	1.15881e+07	1.1135e+07	9.94786e+06	9.13363e+06	8.33648e+06	8.89803e+06	8.41662e+06	9.20992e+06
Q9CR98	5	178.07	Fam136a	0.655539	0.0037573	1.04422	0.604658	1.2267	0.042613	Q9CR98|F136A_MOUSE Protein FAM136A OS=Mus musculus GN=Fam136a PE=1 SV=1	2.76811e+06	3.25826e+06	3.45e+06	3.94174e+06	2.76421e+06	2.564e+06	1.57702e+06	2.30861e+06	2.01076e+06	2.14775e+06	3.11704e+06	2.6199e+06	2.32089e+06	2.56363e+06	2.5703e+06	2.32399e+06	2.6755e+06	2.73088e+06	3.38376e+06	2.66089e+06
Q9D6U8	7	361.04	Fam162a	1.16675	0.0383861	0.930921	0.220535	0.945005	0.347249	Q9D6U8|F162A_MOUSE Protein FAM162A OS=Mus musculus GN=Fam162a PE=1 SV=1	1.73295e+07	1.84127e+07	1.44109e+07	1.81386e+07	1.8239e+07	2.20795e+07	2.20237e+07	2.03849e+07	1.90734e+07	1.73983e+07	1.93768e+07	1.83915e+07	1.79062e+07	1.97578e+07	1.61342e+07	1.62139e+07	1.52958e+07	1.64764e+07	1.79551e+07	1.93e+07
Q8BGY7	3	144.82	Fam210a	2.2773	0.00917372	0.769566	0.45937	0.600127	0.0306343	Q8BGY7|F210A_MOUSE Protein FAM210A OS=Mus musculus GN=Fam210a PE=1 SV=1	256424	411914	180037	275364	198725	855401	644417	311088	677405	523337	296881	624005	456992	332770	492993	159085	123168	249998	397752	765843
Q9CYH2	1	24.08	Fam213a	1.17959	0.531178	1.50498	0.0132559	1.56562	0.0556374	Q9CYH2|F213A_MOUSE Redox-regulatory protein FAM213A OS=Mus musculus GN=Fam213a PE=1 SV=2	198801	113965	275076	213360	146599	72141.4	260932	212379	342298	230268	163921	147294	99954.6	103280	90932.1	139975	207930	203581	192962	166642
Q9DB60	6	217.15	Fam213b	1.46254	0.250796	0.698308	0.264144	0.731725	0.369915	Q9DB60|PGFS_MOUSE Prostamide/prostaglandin F synthase OS=Mus musculus GN=Fam213b PE=1 SV=1	3.76414e+06	3.75841e+06	2.7033e+06	5.22347e+06	3.31205e+06	3.14438e+06	5.87182e+06	4.14505e+06	3.75146e+06	1.05265e+07	8.43065e+06	7.26334e+06	3.49953e+06	3.82443e+06	2.62197e+06	3.01837e+06	2.43267e+06	4.24129e+06	5.60144e+06	2.6108e+06
Q69ZK7	1	19.33	Fam214a	1.73014	0.0496749	1.17568	0.689218	0.591136	0.120313	Q69ZK7|F214A_MOUSE Protein FAM214A OS=Mus musculus GN=Fam214a PE=2 SV=3	159116	156877	147774	38831.2	81784.8	292802	149937	170722	155937	241665	176276	250795	142299	108431	310774	126782	98472.3	350495	470335	116159
Q8BGE5	1	29.55	Fancm	0.943728	0.860433	0.311985	0.0395513	1.04678	0.842084	Q8BGE5|FANCM_MOUSE Fanconi anemia group M protein homolog OS=Mus musculus GN=Fancm PE=1 SV=3	732182	1.1049e+06	248103	524182	598843	253929	356240	1.0494e+06	718819	649286	677211	554705	1.12348e+06	510131	199313	107186	291980	37598.5	48065.9	471354
Q99M01	2	99.09	Fars2	1.15501	0.304919	0.69235	0.000663743	0.79577	0.0139637	Q99M01|SYFM_MOUSE Phenylalanine--tRNA ligase, mitochondrial OS=Mus musculus GN=Fars2 PE=1 SV=1	591442	448789	438316	443680	549941	755938	657673	427902	447439	566429	532389	614893	646439	643746	669171	434418	334329	425481	482526	474126
Q8C0C7	3	137.58	Farsa	1.13048	0.555964	1.64443	0.00218027	0.841115	0.329308	Q8C0C7|SYFA_MOUSE Phenylalanine--tRNA ligase alpha subunit OS=Mus musculus GN=Farsa PE=1 SV=1	176849	215322	237750	177346	169779	106135	163049	224605	312966	297776	250075	198808	341440	159328	211956	387512	430948	367688	373546	350485
Q9WUA2	2	77.53	Farsb	1.23969	0.339984	1.16373	0.130629	1.00186	0.988173	Q9WUA2|SYFB_MOUSE Phenylalanine--tRNA ligase beta subunit OS=Mus musculus GN=Farsb PE=1 SV=2	211221	199035	183874	293489	252368	94715.6	314528	305489	302653	395849	250476	208330	187426	282980	208661	301264	221047	253314	262050	286503
P19096	6	192.16	Fasn	2.12701	0.0443263	1.67298	0.148598	1.43703	0.458404	P19096|FAS_MOUSE Fatty acid synthase OS=Mus musculus GN=Fasn PE=1 SV=2	504637	121689	789102	344970	571865	1.2218e+06	677520	670154	757077	1.63418e+06	289351	591702	208955	136553	396412	615506	925955	281393	383250	509095
P62862	1	35.29	Fau	1.5176	0.00990623	1.38959	0.0383082	0.880575	0.347689	P62862|RS30_MOUSE 40S ribosomal protein S30 OS=Mus musculus GN=Fau PE=1 SV=1	2.4023e+06	1.78639e+06	1.2416e+06	2.06234e+06	2.32695e+06	3.54673e+06	2.45016e+06	2.53303e+06	3.02019e+06	3.3521e+06	2.32193e+06	1.80966e+06	2.75919e+06	2.35677e+06	1.90376e+06	2.99206e+06	3.81476e+06	3.66146e+06	2.93133e+06	2.09616e+06
Q71FD7	6	197.59	Fblim1	1.06609	0.60694	0.953333	0.659879	0.983914	0.797493	Q71FD7|FBLI1_MOUSE Filamin-binding LIM protein 1 OS=Mus musculus GN=Fblim1 PE=1 SV=2	3.00865e+06	4.10322e+06	2.5947e+06	5.05721e+06	4.34754e+06	4.34492e+06	3.9758e+06	4.02025e+06	4.41139e+06	3.62207e+06	4.24082e+06	3.97767e+06	3.2011e+06	3.43551e+06	4.56867e+06	4.74683e+06	3.49763e+06	2.85571e+06	3.5939e+06	3.82326e+06
Q9WVH9	6	445.89	Fbln5	0.980926	0.886406	2.29262	0.00175694	1.43436	0.0761637	Q9WVH9|FBLN5_MOUSE Fibulin-5 OS=Mus musculus GN=Fbln5 PE=1 SV=1	4.13216e+06	3.39921e+06	3.027e+06	3.5169e+06	1.99631e+06	3.11319e+06	3.58432e+06	3.67436e+06	2.91331e+06	2.47985e+06	1.51773e+06	1.90293e+06	2.9867e+06	1.88528e+06	2.91204e+06	5.37154e+06	6.98378e+06	5.33764e+06	4.17077e+06	3.8243e+06
Q61554	2	63.45	Fbn1	0.821696	0.809117	0.860603	0.866742	0.446861	0.529535	Q61554|FBN1_MOUSE Fibrillin-1 OS=Mus musculus GN=Fbn1 PE=1 SV=2	12415	253417	44059.6	15790.1	9325.68	70165.8	58267.2	42768.3	27853.2	76219.7	0	586487	73809.3	2442.44	86951.5	27757.4	260173	227391	88285.4	41578.6
P70695	7	446.22	Fbp2	0.880435	0.209406	0.925544	0.319496	0.917679	0.363925	P70695|F16P2_MOUSE Fructose-1,6-bisphosphatase isozyme 2 OS=Mus musculus GN=Fbp2 PE=1 SV=2	2.64399e+06	1.97723e+06	2.53997e+06	1.8913e+06	2.00065e+06	1.76048e+06	2.17995e+06	1.67578e+06	1.87601e+06	2.23933e+06	2.37457e+06	2.54378e+06	2.16794e+06	2.06382e+06	2.89454e+06	2.27542e+06	1.91174e+06	2.40125e+06	2.25604e+06	2.30341e+06
P62932	1	17.81	Fbxo40	1.12736	0.54823	0.725239	0.095505	0.78906	0.250007	P62932|FBX40_MOUSE F-box only protein 40 OS=Mus musculus GN=Fbxo40 PE=1 SV=1	72186.9	26969.4	42743.5	41228.6	47101	70290.1	54871	34983.3	53247.5	46159.1	80649.3	46290.5	48990.8	73240.1	42606.4	37849.9	38919	55321.4	43408.6	36109.3
P46656	1	32.75	Fdx1	0.905841	0.572077	0.721476	0.108208	1.11913	0.425982	P46656|ADX_MOUSE Adrenodoxin, mitochondrial OS=Mus musculus GN=Fdx1 PE=1 SV=1	263293	359954	324164	412796	261999	403737	370391	294158	230217	170957	246026	287126	198406	269042	448919	188671	253023	200227	227751	176121
P22315	10	443.99	Fech	1.14093	0.187937	0.972753	0.828875	0.919897	0.649194	P22315|HEMH_MOUSE Ferrochelatase, mitochondrial OS=Mus musculus GN=Fech PE=1 SV=2	4.95982e+06	6.16436e+06	4.43744e+06	6.30791e+06	6.41158e+06	6.31532e+06	7.95052e+06	5.92419e+06	6.14566e+06	5.93105e+06	8.12504e+06	6.53488e+06	5.69173e+06	6.47553e+06	3.91658e+06	6.20141e+06	5.35894e+06	5.15419e+06	6.47916e+06	6.7124e+06
Q8CIB5	13	721.44	Fermt2	1.08422	0.0757272	1.08209	0.216143	1.08096	0.130929	Q8CIB5|FERM2_MOUSE Fermitin family homolog 2 OS=Mus musculus GN=Fermt2 PE=1 SV=1	6.05602e+06	5.9851e+06	5.90572e+06	5.96569e+06	5.36158e+06	5.86236e+06	6.78962e+06	6.73925e+06	5.85085e+06	6.49763e+06	5.15029e+06	5.21117e+06	5.89056e+06	6.01623e+06	4.81339e+06	5.65022e+06	5.78313e+06	5.18612e+06	6.05875e+06	6.62654e+06
Q8K1B8	1	17.17	Fermt3	0.649456	0.388381	7.54153	0.113361	1.87715	0.246216	Q8K1B8|URP2_MOUSE Fermitin family homolog 3 OS=Mus musculus GN=Fermt3 PE=1 SV=1	5623.33	11741.1	4606.09	8728.88	11173.7	16075.5	3818.54	968.624	6332.02	0	9267.76	2789.78	2681.65	0	7567.6	1219.23	47977.5	16738.8	11290.9	91000.7
Q9QXC1	5	221.2	Fetub	1.19502	0.0759036	1.4326	0.00315451	1.16221	0.0321286	Q9QXC1|FETUB_MOUSE Fetuin-B OS=Mus musculus GN=Fetub PE=1 SV=1	6.44029e+06	6.25319e+06	8.16552e+06	6.52869e+06	7.26867e+06	8.26131e+06	7.46676e+06	9.14376e+06	9.83533e+06	6.70796e+06	6.3981e+06	6.1068e+06	5.55677e+06	5.58981e+06	6.16782e+06	8.42108e+06	8.71076e+06	1.07009e+07	7.3773e+06	7.50918e+06
E9PV24	13	921.62	Fga	1.08599	0.533635	1.27926	0.0199567	1.15501	0.401489	E9PV24|FIBA_MOUSE Fibrinogen alpha chain OS=Mus musculus GN=Fga PE=1 SV=1	1.89868e+07	1.73678e+07	1.91331e+07	1.34686e+07	9.82268e+06	1.83352e+07	1.77377e+07	1.29479e+07	1.83242e+07	1.82084e+07	1.25645e+07	1.34008e+07	1.43629e+07	1.35733e+07	1.43051e+07	1.40467e+07	2.02771e+07	2.02184e+07	1.51842e+07	1.75275e+07
Q8K0E8	15	1016.09	Fgb	1.09677	0.407387	1.21255	0.0168607	1.12242	0.261668	Q8K0E8|FIBB_MOUSE Fibrinogen beta chain OS=Mus musculus GN=Fgb PE=1 SV=1	3.13886e+07	2.96895e+07	3.05655e+07	2.44881e+07	2.06933e+07	3.15028e+07	3.21143e+07	2.11678e+07	3.23927e+07	3.28872e+07	2.43207e+07	2.35784e+07	2.25868e+07	2.3499e+07	2.7917e+07	2.38804e+07	3.01989e+07	3.18963e+07	3.13588e+07	3.04777e+07
P61148	4	157.64	Fgf1	0.865226	0.327123	1.33189	0.00135453	0.964233	0.672434	P61148|FGF1_MOUSE Fibroblast growth factor 1 OS=Mus musculus GN=Fgf1 PE=1 SV=1	831840	811880	698428	1.20865e+06	967798	708309	556618	1.02288e+06	768439	853357	986628	766635	1.01333e+06	876091	1.04352e+06	1.28085e+06	1.327e+06	1.24128e+06	1.29331e+06	1.09906e+06
Q8VCM7	13	682.73	Fgg	0.903006	0.362208	1.09557	0.109657	1.1409	0.294824	Q8VCM7|FIBG_MOUSE Fibrinogen gamma chain OS=Mus musculus GN=Fgg PE=1 SV=1	1.959e+07	2.07957e+07	1.91427e+07	1.49392e+07	1.22799e+07	1.69025e+07	1.53621e+07	1.32362e+07	1.68556e+07	1.59772e+07	1.46736e+07	1.44133e+07	1.5055e+07	1.62037e+07	1.56885e+07	1.43677e+07	1.80539e+07	1.8401e+07	1.6626e+07	1.58517e+07
Q71KU9	1	17.83	Fgl1	0.878008	0.610129	1.40822	0.32454	1.22858	0.391127	Q71KU9|FGL1_MOUSE Fibrinogen-like protein 1 OS=Mus musculus GN=Fgl1 PE=1 SV=2	203153	495184	219577	307660	270328	257887	381087	148535	342606	183299	240310	388483	252521	136892	199384	329243	188851	348533	191786	656217
P97807	36	2991.07	Fh	0.98074	0.454795	0.9102	0.0333842	0.94396	0.142824	P97807|FUMH_MOUSE Fumarate hydratase, mitochondrial OS=Mus musculus GN=Fh PE=1 SV=3	4.95971e+08	4.96594e+08	5.53631e+08	5.03252e+08	5.14634e+08	5.1697e+08	5.04282e+08	4.87939e+08	5.17429e+08	4.88078e+08	5.65745e+08	5.545e+08	5.76225e+08	5.27815e+08	4.92019e+08	5.07645e+08	4.76852e+08	5.33019e+08	4.84539e+08	4.70323e+08
P97447	5	243.01	Fhl1	0.69467	0.00213097	1.25179	0.0239254	1.36718	0.00226402	P97447|FHL1_MOUSE Four and a half LIM domains protein 1 OS=Mus musculus GN=Fhl1 PE=1 SV=3	6.49092e+06	6.7458e+06	5.7472e+06	7.50447e+06	5.36986e+06	4.84714e+06	4.22066e+06	3.64807e+06	4.7478e+06	4.6673e+06	4.87086e+06	4.82265e+06	4.06501e+06	4.52911e+06	5.0145e+06	6.76127e+06	6.59048e+06	4.69963e+06	5.80988e+06	5.30824e+06
O70433	15	907.33	Fhl2	0.721314	0.125665	0.673537	0.0190282	1.18234	0.357228	O70433|FHL2_MOUSE Four and a half LIM domains protein 2 OS=Mus musculus GN=Fhl2 PE=1 SV=1	1.01213e+08	1.19729e+08	9.5026e+07	1.5983e+08	1.85881e+08	1.09199e+08	6.22664e+07	8.14176e+07	8.85974e+07	1.35798e+08	1.39138e+08	1.04869e+08	9.26942e+07	1.11064e+08	1.1187e+08	1.057e+08	6.26964e+07	4.88836e+07	7.17643e+07	8.78906e+07
Q9CQ92	4	178.36	Fis1	0.97539	0.821513	1.18889	0.0133315	1.06215	0.588105	Q9CQ92|FIS1_MOUSE Mitochondrial fission 1 protein OS=Mus musculus GN=Fis1 PE=1 SV=1	5.34952e+06	5.51666e+06	6.39805e+06	4.72112e+06	3.92821e+06	5.7328e+06	4.34971e+06	4.02409e+06	5.54762e+06	5.62159e+06	4.72671e+06	4.63363e+06	4.80986e+06	5.42205e+06	4.80513e+06	5.07053e+06	6.04931e+06	6.23578e+06	6.33698e+06	5.31318e+06
P26883	3	244.03	Fkbp1a	0.816189	0.0679476	1.14646	0.0453948	1.13855	0.20116	P26883|FKB1A_MOUSE Peptidyl-prolyl cis-trans isomerase FKBP1A OS=Mus musculus GN=Fkbp1a PE=1 SV=2	1.20721e+07	1.5236e+07	1.52672e+07	1.60772e+07	1.07719e+07	1.35584e+07	9.89879e+06	1.15793e+07	1.05386e+07	1.10882e+07	1.19481e+07	1.29674e+07	1.08615e+07	1.17978e+07	1.34014e+07	1.18715e+07	1.46642e+07	1.46872e+07	1.52513e+07	1.34325e+07
Q62446	8	438.74	Fkbp3	0.888101	0.190385	1.20363	0.0404886	1.09607	0.296851	Q62446|FKBP3_MOUSE Peptidyl-prolyl cis-trans isomerase FKBP3 OS=Mus musculus GN=Fkbp3 PE=1 SV=2	1.33669e+07	1.62193e+07	1.45405e+07	1.72733e+07	1.632e+07	1.77128e+07	1.21537e+07	1.30101e+07	1.32521e+07	1.28947e+07	1.51258e+07	1.53563e+07	1.22068e+07	1.13128e+07	1.69059e+07	1.85372e+07	1.71927e+07	1.79605e+07	1.60745e+07	1.55822e+07
P30416	11	505	Fkbp4	0.952449	0.567853	1.07973	0.03388	1.01707	0.796509	P30416|FKBP4_MOUSE Peptidyl-prolyl cis-trans isomerase FKBP4 OS=Mus musculus GN=Fkbp4 PE=1 SV=5	4.88438e+06	5.2098e+06	5.64851e+06	5.5185e+06	4.3705e+06	5.11071e+06	3.64788e+06	4.77029e+06	5.63018e+06	5.25384e+06	4.76219e+06	5.41065e+06	4.90973e+06	4.88695e+06	5.23192e+06	5.52305e+06	5.10483e+06	5.3625e+06	5.51114e+06	5.70913e+06
O54998	1	14.65	Fkbp7	1.04402	0.829673	1.99325	0.0149782	1.46023	0.19579	O54998|FKBP7_MOUSE Peptidyl-prolyl cis-trans isomerase FKBP7 OS=Mus musculus GN=Fkbp7 PE=1 SV=1	20450.9	34020.7	28360.5	39141.1	51538	50565.1	29399.7	42919.3	29120.5	29144.1	27503.5	34132.4	9805.8	6651.38	40731.3	59475.9	50516.6	47365.6	40077.6	39410.4
Q2VIS4	1	27.06	Flg2	0.0375999	0.349956	58.9997	0.327504	73.4465	0.982458	Q2VIS4|FILA2_MOUSE Filaggrin-2 OS=Mus musculus GN=Flg2 PE=1 SV=2	7759.5	1.4801e+06	14784	14860	0	2278.1	3881.88	40701.3	4065	6131.92	4797.96	2064.19	4309.73	4384.41	5105.13	9501.1	12912.3	20880.4	1.16306e+06	12660.6
Q8BTM8	45	2642.47	Flna	1.18308	0.0501369	1.68422	0.0137332	1.05347	0.609287	Q8BTM8|FLNA_MOUSE Filamin-A OS=Mus musculus GN=Flna PE=1 SV=5	2.08292e+07	2.01679e+07	1.54905e+07	1.9421e+07	1.43713e+07	1.93497e+07	2.3059e+07	2.15407e+07	2.15288e+07	2.13302e+07	1.07561e+07	1.43174e+07	1.85823e+07	1.44484e+07	2.75938e+07	2.52365e+07	3.7545e+07	2.47655e+07	2.67704e+07	3.00167e+07
Q80X90	3	468.32	Flnb	2.09088	0.00045737	2.12366	0.0246332	1.08898	0.551648	Q80X90|FLNB_MOUSE Filamin-B OS=Mus musculus GN=Flnb PE=1 SV=3	163650	90624.3	137612	121863	124406	198930	259339	263094	280752	332193	72300	77638.3	138439	159419	138217	397780	299658	167087	169169	210798
Q8VHX6	56	3644.7	Flnc	1.15333	0.0199922	0.851154	0.0267133	0.94055	0.230687	Q8VHX6|FLNC_MOUSE Filamin-C OS=Mus musculus GN=Flnc PE=1 SV=3	6.99726e+07	6.45e+07	6.62404e+07	6.49299e+07	7.79424e+07	7.79996e+07	8.19683e+07	6.96187e+07	8.18424e+07	8.48377e+07	7.11747e+07	6.84198e+07	7.02338e+07	8.22376e+07	7.32367e+07	7.27932e+07	5.57649e+07	5.58211e+07	6.12237e+07	6.5326e+07
O08917	3	97.47	Flot1	0.768835	0.295942	1.48746	0.030518	1.03171	0.939549	O08917|FLOT1_MOUSE Flotillin-1 OS=Mus musculus GN=Flot1 PE=1 SV=1	180833	342546	160081	169907	169942	81793.7	213900	150321	134820	205921	129351	237908	184884	180367	259345	180467	311153	328347	329547	325831
P50608;A2ALU4	2	69.85	Fmod	0.940194	0.80545	1.79872	0.0214111	1.27519	0.366054	P50608|FMOD_MOUSE Fibromodulin OS=Mus musculus GN=Fmod PE=2 SV=1	163809	340213	235229	481142	290845	431227	182366	289921	330288	187053	205213	338574	160700	148752	331864	375303	631393	348764	405297	370916
P11276	12	540.22	Fn1	1.73638	0.000439691	2.14319	7.36244e-05	1.02011	0.892901	P11276|FINC_MOUSE Fibronectin OS=Mus musculus GN=Fn1 PE=1 SV=4	1.6033e+06	1.36311e+06	1.92844e+06	1.41011e+06	1.12508e+06	2.47489e+06	2.38459e+06	2.40731e+06	3.11516e+06	2.5194e+06	1.05883e+06	1.3702e+06	1.63795e+06	1.65633e+06	1.56024e+06	3.60596e+06	3.1583e+06	3.46165e+06	2.8211e+06	2.56304e+06
Q9ER35	2	121.94	Fn3k	0.866956	0.222732	1.06026	0.61066	1.27842	0.0125615	Q9ER35|FN3K_MOUSE Fructosamine-3-kinase OS=Mus musculus GN=Fn3k PE=1 SV=1	575993	519654	508464	600072	568192	598052	611753	381967	452407	359349	413561	356007	531690	480911	386430	478088	427825	544330	517201	331834
Q8K274	2	61.65	Fn3krp	0.943368	0.714301	1.31589	0.0799639	1.1523	0.13126	Q8K274|KT3K_MOUSE Ketosamine-3-kinase OS=Mus musculus GN=Fn3krp PE=1 SV=2	133988	170561	179971	146996	127397	76574.5	158449	118403	179687	182821	116577	125459	123662	147097	145813	147313	223293	215857	121942	158249
Q6NWW9	1	14.2	Fndc3b	1.09338	0.446507	0.669862	0.0428656	1.05231	0.651308	Q6NWW9|FND3B_MOUSE Fibronectin type III domain-containing protein 3B OS=Mus musculus GN=Fndc3b PE=1 SV=1	439503	538253	463662	377334	591212	678045	504142	548547	448591	455694	246176	428030	506817	604350	504794	327902	266246	359189	259100	321659
Q61239	1	60.54	Fnta	0.834934	0.0562802	1.04522	0.542097	0.974148	0.731103	Q61239|FNTA_MOUSE Protein farnesyltransferase/geranylgeranyltransferase type-1 subunit alpha OS=Mus musculus GN=Fnta PE=1 SV=1	63870	85973.2	67943.7	78464.3	68934.6	71360.8	62560.1	48963.4	62769.5	59252.1	72170	77061.4	87176.8	63143.5	75325.3	81078.1	90816.3	74931.3	75880	69122.3
P47930	1	25.62	Fosl2	0.711511	0.595411	0.704022	0.481089	0.808668	0.348728	P47930|FOSL2_MOUSE Fos-related antigen 2 OS=Mus musculus GN=Fosl2 PE=1 SV=2	1.46558e+06	34979.3	574805	33502.1	696126	48364	433474	835217	330337	348392	1.59248e+06	354476	749790	552696	219216	649044	712286	153581	160114	766986
Q61553	3	78.57	Fscn1	1.81907	0.00537782	1.6056	0.00113369	0.905292	0.243286	Q61553|FSCN1_MOUSE Fascin OS=Mus musculus GN=Fscn1 PE=1 SV=4	194102	254631	288246	309020	313230	344026	417378	497510	660737	552885	284997	315810	307617	296048	296956	614634	449869	434943	502017	409228
P09528	10	749.9	Fth1	0.961349	0.612724	1.2976	0.00843037	1.13804	0.0715658	P09528|FRIH_MOUSE Ferritin heavy chain OS=Mus musculus GN=Fth1 PE=1 SV=2	4.73595e+07	4.46756e+07	4.32829e+07	4.17632e+07	3.5735e+07	4.65559e+07	3.60256e+07	4.65919e+07	4.0095e+07	3.53221e+07	3.84051e+07	4.02755e+07	3.51094e+07	3.29881e+07	4.02234e+07	4.53486e+07	5.23685e+07	5.79012e+07	4.41404e+07	4.2895e+07
P29391;P49945	5	441.57	Ftl1	1.40447	0.0871126	2.14343	0.000699059	1.17654	0.159967	P29391|FRIL1_MOUSE Ferritin light chain 1 OS=Mus musculus GN=Ftl1 PE=1 SV=2	9.03562e+06	1.09292e+07	1.07956e+07	1.00597e+07	8.2333e+06	2.11443e+07	9.70269e+06	1.12906e+07	1.36487e+07	1.31077e+07	7.98119e+06	8.86438e+06	6.71254e+06	6.6379e+06	1.14967e+07	2.03033e+07	2.04333e+07	2.01635e+07	1.56065e+07	1.28589e+07
Q91WJ8	2	53.4	Fubp1	0.777678	0.352348	1.7017	0.0313078	1.36729	0.250364	Q91WJ8|FUBP1_MOUSE Far upstream element-binding protein 1 OS=Mus musculus GN=Fubp1 PE=1 SV=1	126223	198868	213965	349835	155718	267209	112730	136052	143181	153198	179903	182156	116652	76259.8	209030	358755	248153	307068	172391	213736
Q9D6K8	3	137.9	Fundc2	0.812047	0.0669585	1.18129	0.0266366	1.2907	0.00613189	Q9D6K8|FUND2_MOUSE FUN14 domain-containing protein 2 OS=Mus musculus GN=Fundc2 PE=1 SV=1	1.80468e+07	1.98339e+07	1.67771e+07	2.03291e+07	2.01543e+07	1.55751e+07	1.24751e+07	2.12679e+07	1.36127e+07	1.43283e+07	1.74444e+07	1.51914e+07	1.2653e+07	1.54531e+07	1.29711e+07	1.78031e+07	1.74543e+07	1.70565e+07	1.87328e+07	1.603e+07
P56959	2	129.24	Fus	0.360121	0.00929555	1.35432	0.125069	1.71446	0.0841135	P56959|FUS_MOUSE RNA-binding protein FUS OS=Mus musculus GN=Fus PE=1 SV=1	210002	737640	421781	569919	454066	177258	101716	244681	178782	159481	331880	356809	305606	232486	169236	433084	508136	369809	350408	229216
O35943	1	68.99	Fxn	0.892558	0.473325	0.784358	0.0626192	0.947178	0.680127	O35943|FRDA_MOUSE Frataxin, mitochondrial OS=Mus musculus GN=Fxn PE=1 SV=1	464045	734227	801374	839284	572262	871002	523972	535297	587663	526754	779646	797455	568781	571210	884335	505951	526984	522190	685654	584027
Q61584;Q9WVR4;P35922	10	512.25	Fxr1	1.06177	0.501308	1.06652	0.41691	0.979969	0.739693	Q61584|FXR1_MOUSE Fragile X mental retardation syndrome-related protein 1 OS=Mus musculus GN=Fxr1 PE=1 SV=2	2.48885e+06	2.58412e+06	2.93024e+06	2.64836e+06	2.60018e+06	3.55681e+06	2.31175e+06	2.42148e+06	2.8845e+06	2.89579e+06	2.75388e+06	2.77056e+06	2.84691e+06	2.88816e+06	2.26312e+06	3.4016e+06	3.18635e+06	2.64442e+06	2.74284e+06	2.44688e+06
Q9Z239	1	55.9	Fxyd1	1.10708	0.632323	1.41477	0.0484374	1.17394	0.39674	Q9Z239|PLM_MOUSE Phospholemman OS=Mus musculus GN=Fxyd1 PE=1 SV=1	4.78341e+06	6.60804e+06	3.4701e+06	3.5355e+06	3.6e+06	5.71834e+06	6.95974e+06	4.01474e+06	2.67037e+06	4.98941e+06	2.37764e+06	3.80428e+06	4.14191e+06	4.0756e+06	4.33837e+06	3.15628e+06	6.00708e+06	5.57202e+06	6.42467e+06	5.34965e+06
P97855	5	209.85	G3bp1	1.07999	0.536183	1.21765	0.0320886	1.08065	0.291811	P97855|G3BP1_MOUSE Ras GTPase-activating protein-binding protein 1 OS=Mus musculus GN=G3bp1 PE=1 SV=1	1.29064e+06	1.30067e+06	1.46644e+06	1.48495e+06	1.23444e+06	2.07479e+06	1.16978e+06	1.25417e+06	1.37549e+06	1.44499e+06	1.26314e+06	1.34346e+06	1.12533e+06	1.0445e+06	1.4949e+06	1.72007e+06	1.525e+06	1.63738e+06	1.35404e+06	1.39983e+06
P97379	1	18.58	G3bp2	0.749376	0.276252	1.04775	0.788657	0.981675	0.990303	P97379|G3BP2_MOUSE Ras GTPase-activating protein-binding protein 2 OS=Mus musculus GN=G3bp2 PE=1 SV=2	68630	70087.5	69524.5	68945.6	56282.3	5802.4	37126.8	46792.6	82925.7	77246.7	56713.6	72655.3	60262.6	55834.9	94228.3	92405	57208.5	94043.7	62157.3	50099.8
Q00612	1	46.33	G6pdx	1.40736	0.187431	2.52208	0.016967	1.45754	0.380519	Q00612|G6PD1_MOUSE Glucose-6-phosphate 1-dehydrogenase X OS=Mus musculus GN=G6pdx PE=1 SV=3	129517	80083.8	179032	106360	34374.2	90982.5	188151	128599	176680	160596	20575.4	77979.9	67777.7	112174	84684.5	106453	309016	168327	172978	159226
Q8R3R8	1	15.78	Gabarapl1	0.499142	0.00828835	2.09127	0.023823	1.82694	0.000801478	Q8R3R8|GBRL1_MOUSE Gamma-aminobutyric acid receptor-associated protein-like 1 OS=Mus musculus GN=Gabarapl1 PE=1 SV=2	122790	166635	204304	171985	114923	115765	40743.2	69330.1	52994.1	110817	88465.5	85574.5	90414.9	78076.7	84761.3	183702	277805	217892	87909.5	126277
Q9CR59	1	32.79	Gadd45gip1	0.911331	0.212663	1.19578	0.158589	1.11733	0.323448	Q9CR59|G45IP_MOUSE Growth arrest and DNA damage-inducible proteins-interacting protein 1 OS=Mus musculus GN=Gadd45gip1 PE=1 SV=1	259890	354194	300256	366938	293844	272877	305878	285411	283314	287978	361111	231784	300254	302987	213585	285429	344895	405077	365994	284320
Q9R0N0	2	64.23	Galk1	0.78953	0.259336	1.14154	0.388083	1.22494	0.218677	Q9R0N0|GALK1_MOUSE Galactokinase OS=Mus musculus GN=Galk1 PE=1 SV=2	260573	275991	215241	398472	333123	94859.1	315531	315171	221390	224237	272596	310209	162345	246159	219689	290625	323894	198584	224997	344297
Q8K157	1	57.62	Galm	0.959105	0.764274	0.818063	0.0174186	0.977275	0.703675	Q8K157|GALM_MOUSE Aldose 1-epimerase OS=Mus musculus GN=Galm PE=1 SV=1	511675	462841	659206	373082	358152	377378	549321	406030	485696	449815	474340	504556	436685	469084	535283	399073	308084	452018	425959	394534
Q8BHN3	7	208.36	Ganab	1.23065	0.0916508	1.44498	0.000299122	0.976912	0.759591	Q8BHN3|GANAB_MOUSE Neutral alpha-glucosidase AB OS=Mus musculus GN=Ganab PE=1 SV=1	376147	350857	553141	434765	319433	553514	525418	399482	520989	504158	377998	408892	352818	481414	461298	630256	607024	550158	650550	571064
P16858;Q64467	46	3572.46	Gapdh	1.08296	0.221234	1.01184	0.724332	0.992314	0.781402	P16858|G3P_MOUSE Glyceraldehyde-3-phosphate dehydrogenase OS=Mus musculus GN=Gapdh PE=1 SV=2	1.5377e+09	1.73172e+09	1.53483e+09	1.64517e+09	1.73108e+09	1.9869e+09	1.58929e+09	1.51525e+09	1.90189e+09	1.86585e+09	1.69683e+09	1.66612e+09	1.5591e+09	1.65901e+09	1.66282e+09	1.79058e+09	1.59157e+09	1.54263e+09	1.65209e+09	1.76464e+09
Q9CZD3	3	96.76	Gars	1.25316	0.0236132	1.11838	0.0554815	0.960227	0.480901	Q9CZD3|SYG_MOUSE Glycine--tRNA ligase OS=Mus musculus GN=Gars PE=1 SV=1	543081	523965	599973	515384	596935	878834	628280	631923	696584	647348	533363	564410	528871	660997	606818	676026	629115	631204	700319	600428
Q64737	8	441.62	Gart	1.03842	0.624821	0.924356	0.591343	1.04165	0.616842	Q64737|PUR2_MOUSE Trifunctional purine biosynthetic protein adenosine-3 OS=Mus musculus GN=Gart PE=1 SV=3	3.7138e+06	3.12696e+06	3.81063e+06	3.82698e+06	3.25583e+06	3.00657e+06	3.96007e+06	3.2944e+06	4.03891e+06	4.11555e+06	2.29897e+06	2.84645e+06	4.37427e+06	4.59771e+06	2.90768e+06	3.15641e+06	2.92773e+06	3.36359e+06	3.18724e+06	3.10226e+06
O55126;O55125	17	973.19	Gbas	0.907276	0.0130174	0.79783	0.00176632	0.899902	0.0465621	O55126|NIPS2_MOUSE Protein NipSnap homolog 2 OS=Mus musculus GN=Gbas PE=1 SV=1	2.47756e+08	2.5011e+08	2.45283e+08	2.37461e+08	2.42337e+08	2.27231e+08	2.43187e+08	2.01392e+08	2.19376e+08	2.18364e+08	2.83883e+08	2.70362e+08	2.88432e+08	2.86373e+08	2.29927e+08	2.03753e+08	2.09073e+08	2.28401e+08	2.27006e+08	2.15999e+08
Q9D6Y9	3	69.77	Gbe1	1.02391	0.855747	1.1354	0.255564	1.0295	0.755095	Q9D6Y9|GLGB_MOUSE 1,4-alpha-glucan-branching enzyme OS=Mus musculus GN=Gbe1 PE=1 SV=1	749077	581240	648076	605948	508535	451707	754873	541273	598422	820537	623350	618604	617839	606115	538335	470241	611088	774208	834836	720646
Q61107	1	20.35	Gbp4	1.41845	0.0101303	0.666117	0.000316646	0.688327	0.00038462	Q61107|GBP4_MOUSE Guanylate-binding protein 4 OS=Mus musculus GN=Gbp4 PE=1 SV=1	631343	560005	650266	522478	639720	591121	840059	887569	936599	1.0054e+06	808564	758867	887572	990964	917965	631530	634148	539222	502883	599107
P21614	19	1196.52	Gc	1.09149	0.236044	1.38687	0.00147686	1.06455	0.354076	P21614|VTDB_MOUSE Vitamin D-binding protein OS=Mus musculus GN=Gc PE=1 SV=2	2.20451e+07	2.05735e+07	2.51885e+07	2.21892e+07	2.57199e+07	2.40304e+07	2.5e+07	2.7223e+07	2.88684e+07	2.11811e+07	2.00491e+07	1.9728e+07	2.39606e+07	2.47677e+07	2.01946e+07	2.85918e+07	3.07411e+07	3.43359e+07	3.12148e+07	2.58694e+07
P01864;P01863	4	342.67	GCAB_MOUSE	2.36232	0.00208747	2.35976	0.00532371	0.952911	0.803959	P01864|GCAB_MOUSE Ig gamma-2A chain C region secreted form OS=Mus musculus PE=1 SV=1	3.77882e+06	5.94327e+06	4.22728e+06	6.66825e+06	4.56002e+06	1.68817e+07	1.04023e+07	8.93666e+06	1.00162e+07	1.32409e+07	6.83184e+06	4.53649e+06	3.39403e+06	5.45729e+06	6.20215e+06	1.34219e+07	1.34437e+07	1.55002e+07	5.4514e+06	1.45319e+07
Q60759	10	633.3	Gcdh	0.96841	0.508546	0.832565	0.00189006	0.881957	0.0192798	Q60759|GCDH_MOUSE Glutaryl-CoA dehydrogenase, mitochondrial OS=Mus musculus GN=Gcdh PE=1 SV=2	1.34255e+07	1.27676e+07	1.42292e+07	1.3153e+07	1.47224e+07	1.30307e+07	1.50445e+07	1.18752e+07	1.30161e+07	1.31736e+07	1.6689e+07	1.59355e+07	1.49797e+07	1.60774e+07	1.37572e+07	1.34582e+07	1.19886e+07	1.27826e+07	1.30312e+07	1.32123e+07
Q91WK5	2	150.55	Gcsh	0.663485	0.0767822	0.885749	0.663033	1.15258	0.46023	Q91WK5|GCSH_MOUSE Glycine cleavage system H protein, mitochondrial OS=Mus musculus GN=Gcsh PE=1 SV=2	751412	1.00528e+06	648758	957888	454339	698895	362804	443641	677142	350489	756968	1.21074e+06	379218	634609	330760	456268	455287	691978	636253	694075
Q9R111	2	60.16	Gda	1.04381	0.818618	2.12114	0.0162799	1.52451	0.0710669	Q9R111|GUAD_MOUSE Guanine deaminase OS=Mus musculus GN=Gda PE=1 SV=1	241584	248701	243117	175504	124765	289097	220539	111726	246779	210811	102455	163941	101502	91339.7	218795	255648	383589	397455	178591	222923
P50396	9	852.36	Gdi1	1.16228	0.00185162	1.10394	0.0496367	0.95597	0.325358	P50396|GDIA_MOUSE Rab GDP dissociation inhibitor alpha OS=Mus musculus GN=Gdi1 PE=1 SV=3	6.1749e+06	5.63192e+06	6.10151e+06	5.91695e+06	5.64855e+06	7.16125e+06	6.67996e+06	6.43194e+06	6.61222e+06	7.37145e+06	5.80454e+06	6.29177e+06	6.59964e+06	6.62788e+06	5.50752e+06	7.4273e+06	6.46044e+06	6.59608e+06	6.72161e+06	6.83047e+06
Q61598	14	1174.69	Gdi2	1.07235	0.240041	1.18435	0.00633577	1.07085	0.0940833	Q61598|GDIB_MOUSE Rab GDP dissociation inhibitor beta OS=Mus musculus GN=Gdi2 PE=1 SV=1	1.82988e+07	1.90825e+07	2.10521e+07	1.91983e+07	2.10472e+07	2.12375e+07	1.96532e+07	1.84035e+07	2.28331e+07	2.36916e+07	1.91651e+07	1.77233e+07	1.94083e+07	1.85306e+07	1.73225e+07	2.44795e+07	2.20978e+07	2.04472e+07	2.24227e+07	1.96901e+07
Q8K0D5	15	652.31	Gfm1	1.14305	0.0237623	0.835886	0.00368136	0.916641	0.0751384	Q8K0D5|EFGM_MOUSE Elongation factor G, mitochondrial OS=Mus musculus GN=Gfm1 PE=1 SV=1	9.04945e+06	8.06951e+06	8.21318e+06	8.69203e+06	9.23515e+06	1.10704e+07	1.04245e+07	8.90559e+06	9.56403e+06	9.48305e+06	1.01456e+07	9.44531e+06	9.76425e+06	9.50063e+06	8.33755e+06	8.62196e+06	7.38516e+06	7.38476e+06	8.1249e+06	7.93148e+06
Q8R2Q4	5	160.94	Gfm2	1.20554	0.406369	0.797172	0.249994	1.055	0.631095	Q8R2Q4|RRF2M_MOUSE Ribosome-releasing factor 2, mitochondrial OS=Mus musculus GN=Gfm2 PE=1 SV=2	657673	485711	408233	452770	521133	256958	837109	446379	726867	777290	380202	504763	392716	732609	383572	339590	296201	346013	401456	525061
Q9D7X8	5	185.7	Ggct	0.639922	0.0946632	1.13699	0.628736	1.32283	0.208862	Q9D7X8|GGCT_MOUSE Gamma-glutamylcyclotransferase OS=Mus musculus GN=Ggct PE=1 SV=1	2.01113e+06	4.43111e+06	2.35915e+06	2.20896e+06	1.76913e+06	1.9081e+06	1.47738e+06	1.55461e+06	1.52267e+06	1.7151e+06	1.81143e+06	1.93019e+06	1.73483e+06	1.85923e+06	2.32504e+06	1.57076e+06	1.5162e+06	1.8408e+06	4.24627e+06	1.81008e+06
Q91VC9	1	43.06	Ghitm	3.0929	0.0205765	1.64602	0.228975	0.867833	0.859165	Q91VC9|GHITM_MOUSE Growth hormone-inducible transmembrane protein OS=Mus musculus GN=Ghitm PE=1 SV=1	51311	30896.4	21342.3	17219.9	24176.9	127425	137321	71339.2	25433.5	86787.1	10390.6	20882.5	49798.2	36245.4	49704.5	25980.7	85915.8	59866.2	86331.6	16825
Q99JY3	1	26.77	Gimap4	1.79798	0.00838454	1.04769	0.860717	0.885528	0.844794	Q99JY3|GIMA4_MOUSE GTPase IMAP family member 4 OS=Mus musculus GN=Gimap4 PE=1 SV=1	37926.1	33573.7	35083.6	28318	39557.2	71775.2	57462.9	34686.8	71936.4	77812.4	23022.1	27768.3	27582.1	59369.2	59269.2	44229.4	16918.9	49036.1	53513.3	42708.6
P23242	2	72.09	Gja1	1.74459	0.234556	2.35349	0.0331761	1.38542	0.365964	P23242|CXA1_MOUSE Gap junction alpha-1 protein OS=Mus musculus GN=Gja1 PE=1 SV=2	751915	1.68589e+06	561976	385958	371662	2.18116e+06	1.78323e+06	839084	161567	1.59009e+06	23586.8	447767	619567	372451	1.24873e+06	792556	959241	1.33727e+06	1.96977e+06	1.32407e+06
Q64516;P21995	9	310.12	Gk	1.18798	0.0405853	0.820491	0.0609568	0.84831	0.0956979	Q64516|GLPK_MOUSE Glycerol kinase OS=Mus musculus GN=Gk PE=1 SV=2	1.42493e+06	1.41005e+06	1.19193e+06	1.02229e+06	1.19748e+06	1.59899e+06	1.57601e+06	1.26617e+06	1.45885e+06	1.52091e+06	1.24828e+06	1.30707e+06	1.46767e+06	1.73663e+06	1.60404e+06	1.06873e+06	1.16176e+06	1.05208e+06	1.26804e+06	1.49123e+06
Q9CPU0	7	359.42	Glo1	0.979883	0.866271	0.973805	0.717726	1.0026	0.929767	Q9CPU0|LGUL_MOUSE Lactoylglutathione lyase OS=Mus musculus GN=Glo1 PE=1 SV=3	1.29465e+07	1.61467e+07	1.37248e+07	1.48498e+07	1.24699e+07	1.92811e+07	1.13537e+07	1.11465e+07	1.39968e+07	1.29487e+07	1.24791e+07	1.51948e+07	1.36866e+07	1.16052e+07	1.699e+07	1.38232e+07	1.32062e+07	1.35838e+07	1.33162e+07	1.41939e+07
Q9CPV4	9	450.44	Glod4	1.12432	0.0217776	1.16956	0.0360966	0.914017	0.137584	Q9CPV4|GLOD4_MOUSE Glyoxalase domain-containing protein 4 OS=Mus musculus GN=Glod4 PE=1 SV=1	8.99985e+06	9.22106e+06	1.11395e+07	9.3889e+06	1.02475e+07	1.16113e+07	1.06509e+07	1.10261e+07	1.07901e+07	1.10097e+07	1.16924e+07	9.45985e+06	1.07006e+07	1.14296e+07	1.03235e+07	1.17431e+07	1.3587e+07	1.35954e+07	1.32177e+07	1.05522e+07
Q7TNC8	1	17.56	Glra2	0.867007	0.44124	0.944853	0.817886	1.11045	0.576828	Q7TNC8|GLRA2_MOUSE Glycine receptor subunit alpha-2 OS=Mus musculus GN=Glra2 PE=1 SV=1	3.36503e+06	6.19071e+06	3.34321e+06	5.15577e+06	3.55416e+06	4.68189e+06	4.68455e+06	2.74769e+06	3.68539e+06	2.93552e+06	2.67738e+06	5.45566e+06	4.49198e+06	2.78095e+06	4.05361e+06	3.22919e+06	2.38708e+06	3.22668e+06	3.00205e+06	6.54144e+06
Q9QUH0	3	169.6	Glrx	0.780516	0.224504	1.11622	0.525127	1.22031	0.181667	Q9QUH0|GLRX1_MOUSE Glutaredoxin-1 OS=Mus musculus GN=Glrx PE=1 SV=3	1.94562e+06	1.99291e+06	2.33903e+06	2.59781e+06	1.89489e+06	2.80801e+06	1.11286e+06	1.0708e+06	2.05761e+06	1.35709e+06	1.9878e+06	2.1813e+06	1.1782e+06	1.19548e+06	2.28309e+06	1.69035e+06	2.2924e+06	1.74105e+06	2.56112e+06	1.56664e+06
Q9CQM9	6	325.92	Glrx3	0.976327	0.728062	0.939601	0.377232	0.996313	0.943066	Q9CQM9|GLRX3_MOUSE Glutaredoxin-3 OS=Mus musculus GN=Glrx3 PE=1 SV=1	3.01199e+06	3.5786e+06	3.33254e+06	3.68834e+06	4.0338e+06	3.97019e+06	3.44385e+06	3.52119e+06	3.26319e+06	3.02913e+06	3.49226e+06	3.48125e+06	3.2082e+06	3.39399e+06	4.13486e+06	3.95052e+06	3.3416e+06	3.24958e+06	2.98792e+06	3.11124e+06
Q80Y14	3	335.08	Glrx5	0.718334	0.0128758	1.01321	0.910359	1.37057	0.0265685	Q80Y14|GLRX5_MOUSE Glutaredoxin-related protein 5, mitochondrial OS=Mus musculus GN=Glrx5 PE=1 SV=2	4.34843e+06	4.46244e+06	4.75841e+06	5.79491e+06	4.10551e+06	4.39415e+06	2.9207e+06	3.64357e+06	3.07336e+06	2.82729e+06	4.02644e+06	4.36602e+06	2.7102e+06	2.5454e+06	3.476e+06	3.14251e+06	3.41639e+06	3.3852e+06	4.07007e+06	3.33602e+06
D3Z7P3	2	52.3	Gls	1.2993	0.0138625	0.811512	0.127219	0.799054	0.00660431	D3Z7P3|GLSK_MOUSE Glutaminase kidney isoform, mitochondrial OS=Mus musculus GN=Gls PE=1 SV=1	142278	188144	181494	197382	184920	246060	230451	192216	216525	276601	216746	219447	210859	226619	245425	186449	162125	129669	159036	270881
P26443	21	1251.06	Glud1	0.870796	0.0163959	0.769452	1.70192e-05	0.965643	0.371756	P26443|DHE3_MOUSE Glutamate dehydrogenase 1, mitochondrial OS=Mus musculus GN=Glud1 PE=1 SV=1	6.54598e+07	5.71169e+07	6.55174e+07	5.88483e+07	5.8916e+07	5.46518e+07	5.93351e+07	4.77219e+07	5.16469e+07	5.29846e+07	6.40078e+07	5.80256e+07	6.64466e+07	6.55273e+07	6.27332e+07	5.02967e+07	4.7448e+07	4.89315e+07	4.98886e+07	4.7152e+07
P15105	2	157.59	Glul	0.884171	0.309463	0.876156	0.0671418	1.12338	0.380479	P15105|GLNA_MOUSE Glutamine synthetase OS=Mus musculus GN=Glul PE=1 SV=6	2.07793e+06	1.37287e+06	2.37512e+06	1.99248e+06	1.59642e+06	1.6088e+06	2.03454e+06	1.56562e+06	1.53849e+06	1.57686e+06	1.67173e+06	1.66268e+06	1.46509e+06	2.01114e+06	1.57015e+06	1.48851e+06	1.34977e+06	1.44226e+06	1.55422e+06	1.50812e+06
Q9CQI3;Q9ERL7	2	76.92	Gmfb	0.742422	0.0477384	1.06489	0.443126	1.06597	0.642742	Q9CQI3|GMFB_MOUSE Glia maturation factor beta OS=Mus musculus GN=Gmfb PE=1 SV=3	449548	608551	486602	761503	608729	542460	349981	470515	402420	398734	601438	559410	464348	463145	646193	597114	619108	519579	531951	644215
Q9DCZ1	7	565.98	Gmpr	1.15393	0.114019	1.3326	0.00133449	1.03324	0.615097	Q9DCZ1|GMPR1_MOUSE GMP reductase 1 OS=Mus musculus GN=Gmpr PE=1 SV=1	5.54996e+06	4.88286e+06	5.24302e+06	5.15361e+06	6.08149e+06	7.42501e+06	4.97048e+06	5.75505e+06	6.75853e+06	6.14429e+06	5.66519e+06	5.23618e+06	5.58476e+06	5.44389e+06	4.11514e+06	7.77061e+06	6.47235e+06	6.93549e+06	6.86608e+06	6.6633e+06
P21278	1	33.33	Gna11	2.44433	0.118011	1.66168	0.108211	1.01286	0.731045	P21278|GNA11_MOUSE Guanine nucleotide-binding protein subunit alpha-11 OS=Mus musculus GN=Gna11 PE=1 SV=1	82050.8	106216	77098.9	43114	33874.8	377138	97683.5	80672.6	105623	175711	10907.8	73310.1	55661.6	86081.5	112048	48038.7	116106	158035	129443	110039
P08752;B2RSH2;Q9DC51;P18872;P20612;P27600	9	370.92	Gnai2	1.40919	0.0686873	1.37029	0.093927	1.07807	0.636729	P08752|GNAI2_MOUSE Guanine nucleotide-binding protein G(i) subunit alpha-2 OS=Mus musculus GN=Gnai2 PE=1 SV=5	3.7301e+06	4.56483e+06	2.78981e+06	2.62407e+06	2.41227e+06	5.27047e+06	4.78563e+06	3.67746e+06	3.21287e+06	5.77116e+06	1.47348e+06	2.48655e+06	4.25864e+06	3.01023e+06	3.72478e+06	2.8171e+06	4.30729e+06	4.49527e+06	4.53359e+06	4.33759e+06
P63094;Q8CGK7	6	263.25	Gnas	1.00473	0.972969	1.30594	0.0272171	1.10779	0.426069	P63094|GNAS2_MOUSE Guanine nucleotide-binding protein G(s) subunit alpha isoforms short OS=Mus musculus GN=Gnas PE=1 SV=1	1.33605e+06	2.01625e+06	1.27498e+06	1.36283e+06	1.28253e+06	1.35013e+06	2.00828e+06	1.32066e+06	1.30057e+06	1.32741e+06	1.16014e+06	1.02355e+06	1.30562e+06	1.54455e+06	1.53115e+06	1.3137e+06	1.74538e+06	1.84218e+06	1.95431e+06	1.71795e+06
P62874	2	295.59	Gnb1	1.1348	0.388465	1.20878	0.221235	1.117	0.455531	P62874|GBB1_MOUSE Guanine nucleotide-binding protein G(I)/G(S)/G(T) subunit beta-1 OS=Mus musculus GN=Gnb1 PE=1 SV=3	812058	920292	722753	1.10939e+06	1.27603e+06	1.10797e+06	956030	795040	1.31565e+06	1.31834e+06	846986	834409	1.06728e+06	925669	659155	1.22649e+06	794017	820674	985831	1.41121e+06
P62880;P29387;O88879	5	564.99	Gnb2	1.02846	0.718282	1.11726	0.0670506	1.04593	0.55168	P62880|GBB2_MOUSE Guanine nucleotide-binding protein G(I)/G(S)/G(T) subunit beta-2 OS=Mus musculus GN=Gnb2 PE=1 SV=3	5.31171e+06	6.46103e+06	4.85448e+06	5.65411e+06	6.46733e+06	6.69938e+06	5.13927e+06	5.29804e+06	6.34412e+06	6.08617e+06	5.73404e+06	5.77285e+06	5.80792e+06	5.35691e+06	4.81456e+06	6.30066e+06	5.71e+06	5.5257e+06	6.31099e+06	6.86191e+06
O88958	1	30.97	Gnpda1	0.688595	0.506194	0.922605	0.733382	0.764602	0.212863	O88958|GNPI1_MOUSE Glucosamine-6-phosphate isomerase 1 OS=Mus musculus GN=Gnpda1 PE=1 SV=3	188367	237730	174769	149949	875983	93818.9	153628	347323	243346	282090	386861	303723	479847	300963	656245	489771	584080	283727	380698	224695
P05201	27	2046.67	Got1	0.974302	0.480436	0.996175	0.834405	1.02993	0.211036	P05201|AATC_MOUSE Aspartate aminotransferase, cytoplasmic OS=Mus musculus GN=Got1 PE=1 SV=3	4.48265e+08	4.31777e+08	4.72207e+08	4.41785e+08	4.37489e+08	4.63962e+08	4.33031e+08	3.83154e+08	4.46414e+08	4.47616e+08	4.32928e+08	4.44907e+08	4.43295e+08	4.36505e+08	4.09047e+08	4.45696e+08	4.27375e+08	4.23443e+08	4.36456e+08	4.25422e+08
P05202	35	2587.95	Got2	1.05666	0.229044	0.762128	0.00048875	0.851484	0.00781025	P05202|AATM_MOUSE Aspartate aminotransferase, mitochondrial OS=Mus musculus GN=Got2 PE=1 SV=1	7.37747e+08	6.71788e+08	7.41174e+08	6.82684e+08	7.25367e+08	8.01097e+08	8.12592e+08	6.58205e+08	7.4252e+08	7.45966e+08	8.44642e+08	7.82815e+08	8.99178e+08	9.12439e+08	7.40405e+08	6.1617e+08	6.2531e+08	6.14776e+08	6.49878e+08	6.79166e+08
Q8K2C8	1	20.29	Gpat4	0.834081	0.406145	0.607353	0.110482	1.23744	0.326953	Q8K2C8|GPAT4_MOUSE Glycerol-3-phosphate acyltransferase 4 OS=Mus musculus GN=Gpat4 PE=1 SV=1	628410	1.22456e+06	683905	1.06283e+06	849331	1.1198e+06	895298	437784	748004	509969	299632	755680	1.04544e+06	608917	885676	601266	178005	415541	306911	681921
Q9QZF2	3	71.83	Gpc1	2.52408	0.025231	1.2689	0.255501	0.676852	0.196718	Q9QZF2|GPC1_MOUSE Glypican-1 OS=Mus musculus GN=Gpc1 PE=1 SV=1	474572	395819	427045	187001	195782	1.26718e+06	750027	363255	622715	1.23782e+06	272816	341913	539199	500404	828070	434417	655768	659817	734094	665822
Q8C0L9	2	51.77	Gpcpd1	1.56242	0.18932	0.859087	0.25515	0.660205	0.0495856	Q8C0L9|GPCP1_MOUSE Glycerophosphocholine phosphodiesterase GPCPD1 OS=Mus musculus GN=Gpcpd1 PE=1 SV=1	260037	460203	446524	250693	650895	981547	982866	273308	555905	438007	480433	699041	563943	809865	579610	525180	613131	499230	404708	649178
P13707	7	350.65	Gpd1	0.858036	0.205499	0.971174	0.60024	1.27903	0.021454	P13707|GPDA_MOUSE Glycerol-3-phosphate dehydrogenase [NAD(+)], cytoplasmic OS=Mus musculus GN=Gpd1 PE=1 SV=3	6.13264e+06	4.51259e+06	5.44614e+06	4.00725e+06	4.45695e+06	4.26022e+06	3.54671e+06	3.97679e+06	3.84064e+06	5.44519e+06	3.40188e+06	3.95395e+06	4.02919e+06	3.79747e+06	4.01616e+06	3.91462e+06	3.9664e+06	3.10669e+06	3.66803e+06	3.98947e+06
Q3ULJ0	6	348.45	Gpd1l	1.05265	0.316936	1.00469	0.944262	0.947579	0.388294	Q3ULJ0|GPD1L_MOUSE Glycerol-3-phosphate dehydrogenase 1-like protein OS=Mus musculus GN=Gpd1l PE=1 SV=2	3.78147e+06	3.94123e+06	3.54335e+06	3.78916e+06	4.26588e+06	4.13239e+06	3.78596e+06	3.87638e+06	3.92512e+06	4.61843e+06	3.88582e+06	3.97373e+06	4.36789e+06	4.63194e+06	3.53057e+06	3.99434e+06	3.8595e+06	3.65589e+06	4.26148e+06	4.71445e+06
Q64521	3	123.01	Gpd2	1.07182	0.606992	0.786906	0.0477365	0.961951	0.634347	Q64521|GPDM_MOUSE Glycerol-3-phosphate dehydrogenase, mitochondrial OS=Mus musculus GN=Gpd2 PE=1 SV=2	279481	167146	314869	262285	248585	234178	331497	235324	232230	330520	257901	306506	238925	258112	261250	240814	140626	183681	213917	261797
P06745	37	2089.82	Gpi	1.22176	0.0205393	1.21614	0.0117301	1.03672	0.480862	P06745|G6PI_MOUSE Glucose-6-phosphate isomerase OS=Mus musculus GN=Gpi PE=1 SV=4	1.64761e+08	1.56604e+08	1.6244e+08	1.48125e+08	1.47171e+08	2.2129e+08	1.83219e+08	1.51622e+08	1.98664e+08	1.97076e+08	1.43192e+08	1.2964e+08	1.64221e+08	1.69058e+08	1.45395e+08	1.76163e+08	1.71009e+08	2.09296e+08	1.82922e+08	1.74548e+08
O70362	2	41.65	Gpld1	1.05869	0.858467	1.79744	0.00675005	0.920393	0.575545	O70362|PHLD_MOUSE Phosphatidylinositol-glycan-specific phospholipase D OS=Mus musculus GN=Gpld1 PE=1 SV=1	51109.9	107118	87225.3	38752.4	87919.5	31662	65295.1	140820	107817	48370.8	95114.2	57882.4	91505.1	95858.5	63951.3	174220	170142	162237	129495	90629.4
Q99LD4	5	201.82	Gps1	1.07787	0.419832	1.18202	0.0271359	1.00289	0.968412	Q99LD4|CSN1_MOUSE COP9 signalosome complex subunit 1 OS=Mus musculus GN=Gps1 PE=1 SV=1	847724	662297	814856	707183	712036	664557	863746	728461	775314	1.00358e+06	718984	676796	686245	795596	855700	879185	741151	936019	935596	920913
Q6IR34	1	19.97	Gpsm1	0.728335	0.0946167	0.953967	0.737627	1.3179	0.137313	Q6IR34|GPSM1_MOUSE G-protein-signaling modulator 1 OS=Mus musculus GN=Gpsm1 PE=1 SV=3	92923.4	144339	99348.7	124379	72783.9	108225	54558.9	69719.9	81809.5	74452.8	70413.8	116560	56325.4	82583.5	79134.8	76772.9	75937.3	84835.8	63366.7	85460.7
Q8QZR5	3	153.01	Gpt	0.916147	0.775228	0.878921	0.655257	1.11865	0.838194	Q8QZR5|ALAT1_MOUSE Alanine aminotransferase 1 OS=Mus musculus GN=Gpt PE=1 SV=3	659674	214909	539660	336776	278912	339969	172132	246782	603695	497137	296419	380679	337682	510560	289282	292543	96607.2	176811	503087	525863
P11352	4	115.87	Gpx1	1.01373	0.943515	1.54028	0.00793774	1.20469	0.18089	P11352|GPX1_MOUSE Glutathione peroxidase 1 OS=Mus musculus GN=Gpx1 PE=1 SV=2	1.64667e+06	2.09193e+06	1.93913e+06	2.36216e+06	2.65614e+06	3.39865e+06	1.20004e+06	2.20441e+06	1.76451e+06	2.27529e+06	1.89133e+06	1.59827e+06	1.4513e+06	1.41867e+06	2.51905e+06	2.99842e+06	3.19152e+06	2.85056e+06	2.21111e+06	2.424e+06
P46412;P21765	8	299.59	Gpx3	1.57509	0.0077236	1.79904	0.000402747	1.18416	0.152808	P46412|GPX3_MOUSE Glutathione peroxidase 3 OS=Mus musculus GN=Gpx3 PE=1 SV=2	7.3873e+06	9.87877e+06	1.05206e+07	7.86916e+06	7.49725e+06	1.7036e+07	1.32857e+07	9.76736e+06	1.24987e+07	1.5382e+07	6.4571e+06	6.86381e+06	7.00849e+06	6.32512e+06	9.78751e+06	1.23512e+07	1.41251e+07	1.54098e+07	1.28041e+07	1.08704e+07
O70325;Q91XR9;P97813	9	310.65	Gpx4	1.07567	0.299731	1.01648	0.541849	0.979299	0.473456	O70325|GPX41_MOUSE Phospholipid hydroperoxide glutathione peroxidase, mitochondrial OS=Mus musculus GN=Gpx4 PE=1 SV=4	6.74331e+06	6.13939e+06	6.17438e+06	6.61083e+06	6.02276e+06	7.95363e+06	7.07393e+06	5.41154e+06	6.78026e+06	6.86929e+06	6.87953e+06	6.25171e+06	6.27935e+06	6.55107e+06	6.3989e+06	6.49431e+06	6.37647e+06	6.35879e+06	7.0224e+06	6.64191e+06
Q9JJA9	1	18.4	Grasp	0.81982	0.335784	1.38253	0.254236	1.09764	0.640664	Q9JJA9|GRASP_MOUSE General receptor for phosphoinositides 1-associated scaffold protein OS=Mus musculus GN=Grasp PE=1 SV=2	36135.3	62332.2	61897.4	99215.2	88444.8	50771	55021	75514	59085.8	44925.9	121396	53465	64342	43658.4	34206.1	116770	111202	87520.9	74030.3	48832.1
Q60631	6	256.51	Grb2	0.773179	0.00347755	1.03394	0.662989	1.04302	0.575824	Q60631|GRB2_MOUSE Growth factor receptor-bound protein 2 OS=Mus musculus GN=Grb2 PE=1 SV=1	1.63668e+06	1.9004e+06	1.7575e+06	1.96575e+06	1.59115e+06	1.18392e+06	1.31044e+06	1.55687e+06	1.31594e+06	1.47661e+06	1.75404e+06	1.94175e+06	1.51092e+06	1.32913e+06	1.95053e+06	1.67387e+06	1.70559e+06	1.77882e+06	1.88426e+06	1.73183e+06
O35127	1	69.66	Grcc10	0.529568	0.0405227	1.1001	0.677598	1.22922	0.338021	O35127|C10_MOUSE Protein C10 OS=Mus musculus GN=Grcc10 PE=1 SV=1	65899.7	103246	64670.5	108802	59316.2	83146.2	30226.7	51505.7	23151.5	24821.3	95692.3	90676.8	40974.7	28140.1	71500.3	55110.1	62870.7	63688	91254.2	86791.1
Q91Z53	9	470.5	Grhpr	1.23092	0.122321	1.0164	0.705967	0.91312	0.0422569	Q91Z53|GRHPR_MOUSE Glyoxylate reductase/hydroxypyruvate reductase OS=Mus musculus GN=Grhpr PE=1 SV=1	5.55026e+06	6.18383e+06	5.23893e+06	6.06536e+06	6.1912e+06	9.41946e+06	6.57045e+06	4.79744e+06	7.41522e+06	7.7766e+06	5.96556e+06	6.51436e+06	6.49482e+06	6.39542e+06	6.64052e+06	6.5605e+06	5.94293e+06	6.14898e+06	6.5257e+06	7.3575e+06
P47743	1	14.64	Grm8	2.3756	0.00236451	0.593551	0.0257852	0.711868	0.0364286	P47743|GRM8_MOUSE Metabotropic glutamate receptor 8 OS=Mus musculus GN=Grm8 PE=1 SV=2	2.1242e+06	2.03707e+06	2.31359e+06	1.67275e+06	1.23197e+06	5.53702e+06	5.37809e+06	2.40604e+06	4.46465e+06	4.49638e+06	2.44497e+06	2.14449e+06	2.67497e+06	3.4961e+06	2.41549e+06	1.47305e+06	1.04013e+06	1.03823e+06	1.50343e+06	2.7658e+06
Q99LP6	7	411.84	Grpel1	1.06333	0.418223	0.893773	0.146386	1.00066	0.926766	Q99LP6|GRPE1_MOUSE GrpE protein homolog 1, mitochondrial OS=Mus musculus GN=Grpel1 PE=1 SV=1	1.49606e+07	1.6464e+07	1.42998e+07	1.61745e+07	1.52003e+07	1.99384e+07	1.36767e+07	1.61499e+07	1.73004e+07	1.49165e+07	1.8567e+07	1.48094e+07	1.42815e+07	1.33253e+07	1.60655e+07	1.49725e+07	1.22214e+07	1.33445e+07	1.41978e+07	1.41279e+07
Q8C5Q4	1	16.5	Grsf1	0.610227	0.0631601	1.42873	0.14421	1.29464	0.342589	Q8C5Q4|GRSF1_MOUSE G-rich sequence factor 1 OS=Mus musculus GN=Grsf1 PE=1 SV=2	839283	1.54038e+06	769179	1.88393e+06	1.62644e+06	802370	677353	1.13762e+06	611522	834762	1.27733e+06	1.64747e+06	631330	630023	957518	1.72224e+06	2.09838e+06	1.17548e+06	1.15531e+06	1.19749e+06
Q9EST1;Q32M21	2	33.68	Gsdma	0.677479	0.0943106	1.23396	0.10173	1.1454	0.309378	Q9EST1|GSDMA_MOUSE Gasdermin-A OS=Mus musculus GN=Gsdma PE=2 SV=1	354646	540290	338803	340564	446536	99113.2	226625	443632	286899	312807	440431	281470	329259	330146	383000	438158	548282	385202	464957	340489
Q9WV60	1	37.76	Gsk3b	1.40082	0.0843928	1.08782	0.702942	0.896385	0.550114	Q9WV60|GSK3B_MOUSE Glycogen synthase kinase-3 beta OS=Mus musculus GN=Gsk3b PE=1 SV=2	730953	433532	367153	270316	487964	525159	700310	507126	718466	756700	383047	377717	636912	702668	454271	524657	294557	442044	719603	798094
P13020	14	818.7	Gsn	1.11476	0.0196548	1.22632	0.00118846	0.955681	0.388069	P13020|GELS_MOUSE Gelsolin OS=Mus musculus GN=Gsn PE=1 SV=3	2.01019e+07	2.4057e+07	2.40189e+07	2.12547e+07	2.15107e+07	2.59343e+07	2.51695e+07	2.40584e+07	2.38912e+07	2.46214e+07	2.08728e+07	2.22227e+07	2.44734e+07	2.30979e+07	2.54214e+07	2.71144e+07	3.01796e+07	2.94442e+07	2.64975e+07	2.91253e+07
Q8R050	2	92.09	Gspt1	1.39542	0.0975491	1.18601	0.0967749	0.907942	0.352814	Q8R050|ERF3A_MOUSE Eukaryotic peptide chain release factor GTP-binding subunit ERF3A OS=Mus musculus GN=Gspt1 PE=1 SV=2	341387	492048	426834	371972	622171	414595	510387	605820	750298	864749	529414	544309	412747	504273	492244	745846	614826	508526	517907	557739
P47791	4	136.05	Gsr	1.0205	0.866451	1.04929	0.415284	1.03005	0.552916	P47791|GSHR_MOUSE Glutathione reductase, mitochondrial OS=Mus musculus GN=Gsr PE=1 SV=3	1.37065e+06	1.47543e+06	1.47281e+06	1.65808e+06	1.3714e+06	904312	1.46519e+06	1.58829e+06	1.90563e+06	1.63555e+06	1.51301e+06	1.36572e+06	1.56003e+06	1.36627e+06	1.32893e+06	1.52245e+06	1.41862e+06	1.32323e+06	1.49012e+06	1.73117e+06
P30115	1	52.79	Gsta3	0.70119	0.0352681	0.982587	0.90866	1.36727	0.0855725	P30115|GSTA3_MOUSE Glutathione S-transferase A3 OS=Mus musculus GN=Gsta3 PE=1 SV=2	89464.1	72852.9	117626	133958	131140	86165.3	79046.4	58838.3	76322.3	81804.6	84158.4	85872.8	80722.1	53055.5	94825.8	56698.1	113032	77820.8	72656.7	71485
P24472;P13745	9	738.6	Gsta4	1.03404	0.701102	0.90038	0.0763645	0.926432	0.209274	P24472|GSTA4_MOUSE Glutathione S-transferase A4 OS=Mus musculus GN=Gsta4 PE=1 SV=3	2.7714e+07	2.55983e+07	3.04357e+07	2.7222e+07	2.41529e+07	3.59605e+07	2.54162e+07	2.5669e+07	2.76507e+07	2.50254e+07	2.72956e+07	2.69549e+07	3.03066e+07	2.79344e+07	3.33617e+07	2.51757e+07	2.73223e+07	2.81695e+07	2.67976e+07	2.38579e+07
Q9DCM2	13	792.63	Gstk1	0.926035	0.166455	0.861111	0.00593963	0.920705	0.104618	Q9DCM2|GSTK1_MOUSE Glutathione S-transferase kappa 1 OS=Mus musculus GN=Gstk1 PE=1 SV=3	3.81294e+07	3.45491e+07	3.61129e+07	3.13663e+07	3.33287e+07	2.99381e+07	3.67657e+07	3.02633e+07	3.21012e+07	3.1586e+07	4.10606e+07	3.49565e+07	3.89318e+07	3.82477e+07	3.52312e+07	2.98138e+07	3.48238e+07	3.20155e+07	3.28838e+07	3.27202e+07
P10649	17	1185.28	Gstm1	0.932144	0.141217	0.892186	0.0446688	0.954888	0.37668	P10649|GSTM1_MOUSE Glutathione S-transferase Mu 1 OS=Mus musculus GN=Gstm1 PE=1 SV=2	7.8363e+07	7.45479e+07	8.18478e+07	7.9548e+07	6.83861e+07	7.80719e+07	7.25973e+07	6.51163e+07	7.19317e+07	6.90079e+07	7.42846e+07	7.37973e+07	9.02939e+07	8.09809e+07	8.14157e+07	6.57578e+07	7.54606e+07	7.51711e+07	6.73994e+07	7.37746e+07
P15626;O35660	8	955.93	Gstm2	1.19597	0.12083	1.13692	0.0325283	1.04202	0.580892	P15626|GSTM2_MOUSE Glutathione S-transferase Mu 2 OS=Mus musculus GN=Gstm2 PE=1 SV=2	2.08789e+07	1.70621e+07	2.16445e+07	2.13156e+07	1.71119e+07	3.01226e+07	2.28378e+07	1.79634e+07	2.23128e+07	2.39844e+07	1.72123e+07	1.6969e+07	1.98019e+07	1.93567e+07	2.07209e+07	1.93222e+07	2.22508e+07	2.30145e+07	2.03748e+07	2.19771e+07
P48774	5	227.83	Gstm5	1.04908	0.46244	0.784006	0.0126292	0.823172	0.0367326	P48774|GSTM5_MOUSE Glutathione S-transferase Mu 5 OS=Mus musculus GN=Gstm5 PE=1 SV=1	897576	774332	891577	700769	734665	839915	838814	758389	810666	947389	945443	831635	934249	1.1905e+06	956115	809115	713417	676464	823171	786488
Q80W21	3	640.89	Gstm7	1.06206	0.507248	0.975598	0.683591	0.849143	0.0358053	Q80W21|GSTM7_MOUSE Glutathione S-transferase Mu 7 OS=Mus musculus GN=Gstm7 PE=1 SV=1	1.66178e+06	1.78302e+06	2.07522e+06	1.93855e+06	1.807e+06	1.96252e+06	1.98286e+06	1.58275e+06	2.4947e+06	1.81773e+06	2.0249e+06	1.95116e+06	2.22762e+06	2.61461e+06	2.09338e+06	1.97254e+06	2.11337e+06	2.25026e+06	2.18227e+06	2.12695e+06
O09131;Q8K2Q2	17	801.49	Gsto1	0.886276	0.0704652	0.989151	0.785729	1.14462	0.0070508	O09131|GSTO1_MOUSE Glutathione S-transferase omega-1 OS=Mus musculus GN=Gsto1 PE=1 SV=2	2.55267e+07	3.00353e+07	2.71981e+07	2.87707e+07	2.74933e+07	2.75716e+07	2.27374e+07	2.05356e+07	2.67164e+07	2.56527e+07	2.55179e+07	2.19945e+07	2.45136e+07	2.49483e+07	2.4484e+07	2.54662e+07	2.19889e+07	2.32729e+07	2.35751e+07	2.58375e+07
P19157;P46425	17	973.98	Gstp1	1.03041	0.581815	1.11506	0.0236715	1.05697	0.12259	P19157|GSTP1_MOUSE Glutathione S-transferase P 1 OS=Mus musculus GN=Gstp1 PE=1 SV=2	7.25009e+07	7.51076e+07	7.35708e+07	7.77029e+07	7.38501e+07	8.69681e+07	7.09554e+07	6.53973e+07	7.91495e+07	8.1595e+07	7.1075e+07	6.96414e+07	6.42017e+07	6.9824e+07	7.79009e+07	7.89916e+07	7.66539e+07	8.06948e+07	7.27274e+07	8.41509e+07
Q64471	1	22.57	Gstt1	0.559958	0.00237683	0.90696	0.483503	1.21483	0.0590201	Q64471|GSTT1_MOUSE Glutathione S-transferase theta-1 OS=Mus musculus GN=Gstt1 PE=1 SV=4	228865	273727	236291	239635	221772	60714.7	135326	167328	117220	191523	148473	199784	199970	255298	184504	127463	176849	153661	212474	225657
Q61133	1	43.4	Gstt2	0.374717	0.0157962	1.19253	0.368655	1.07307	0.690262	Q61133|GSTT2_MOUSE Glutathione S-transferase theta-2 OS=Mus musculus GN=Gstt2 PE=1 SV=4	37987.1	64198.3	50465.6	68056.4	92862.6	165.103	25975.4	29686	9551.12	52122.2	63630.1	74012.6	34444.6	32506.7	87622.9	79844.3	78343.5	63902.8	55289.3	71099
Q9WVL0	8	426.38	Gstz1	0.900772	0.0490865	0.869055	0.0385783	1.03157	0.54987	Q9WVL0|MAAI_MOUSE Maleylacetoacetate isomerase OS=Mus musculus GN=Gstz1 PE=1 SV=1	4.88485e+06	5.27068e+06	5.50694e+06	5.80371e+06	5.50508e+06	4.67751e+06	5.29611e+06	4.28977e+06	4.98421e+06	5.04737e+06	4.85184e+06	4.65577e+06	6.05888e+06	5.3853e+06	5.19395e+06	4.69657e+06	4.63983e+06	4.03719e+06	4.5606e+06	4.7879e+06
Q8C3X4	1	50.88	Guf1	1.15896	0.268951	1.03557	0.752035	1.04984	0.630738	Q8C3X4|GUF1_MOUSE Translation factor Guf1, mitochondrial OS=Mus musculus GN=Guf1 PE=1 SV=1	363456	256229	355293	373564	324536	493810	344470	268761	382797	449201	295435	339727	328929	247530	382034	408387	244382	321588	347843	328137
Q9R062	8	647.05	Gyg1	1.02897	0.725857	0.998021	0.972147	0.982059	0.733354	Q9R062|GLYG_MOUSE Glycogenin-1 OS=Mus musculus GN=Gyg1 PE=1 SV=3	1.02469e+07	1.30825e+07	1.30739e+07	1.29316e+07	9.89435e+06	1.1023e+07	1.14266e+07	1.12047e+07	1.38909e+07	1.33998e+07	1.13124e+07	1.15061e+07	1.17642e+07	1.2726e+07	1.30026e+07	1.24889e+07	1.11394e+07	1.40778e+07	1.10737e+07	1.14122e+07
Q9Z1E4;Q8VCB3	13	542.93	Gys1	1.15158	0.129474	0.799084	0.00345266	0.922077	0.339265	Q9Z1E4|GYS1_MOUSE Glycogen [starch] synthase, muscle OS=Mus musculus GN=Gys1 PE=1 SV=2	8.45445e+06	5.87395e+06	7.00797e+06	5.57884e+06	6.91147e+06	7.55525e+06	8.35676e+06	6.5875e+06	8.12044e+06	8.33433e+06	6.85588e+06	6.38776e+06	8.08432e+06	8.04994e+06	7.30738e+06	5.95315e+06	5.31493e+06	6.03645e+06	6.07672e+06	5.93339e+06
P10922	4	319.16	H1f0	0.916069	0.295883	1.30253	0.0258371	1.06296	0.103332	P10922|H10_MOUSE Histone H1.0 OS=Mus musculus GN=H1f0 PE=2 SV=4	2.99974e+07	2.86246e+07	2.86905e+07	2.97378e+07	2.62681e+07	3.31961e+07	2.30351e+07	2.24705e+07	2.39478e+07	2.86402e+07	2.60247e+07	2.9554e+07	2.65906e+07	2.64842e+07	2.61765e+07	2.7238e+07	4.3314e+07	4.0175e+07	3.17863e+07	3.31067e+07
Q9QZQ8	7	533.6	H2afy	1.37065	0.0679971	1.74454	0.000780955	1.09623	0.213789	Q9QZQ8|H2AY_MOUSE Core histone macro-H2A.1 OS=Mus musculus GN=H2afy PE=1 SV=3	3.19861e+06	3.64337e+06	2.9732e+06	3.51325e+06	3.1598e+06	6.47828e+06	4.67013e+06	2.97126e+06	4.29413e+06	4.18584e+06	3.03297e+06	3.39134e+06	3.30932e+06	2.90036e+06	2.40681e+06	4.70154e+06	6.54328e+06	5.57765e+06	5.13946e+06	4.27734e+06
Q8CCK0	1	224.69	H2afy2	0.718278	0.178922	1.03098	0.861053	1.09669	0.757036	Q8CCK0|H2AW_MOUSE Core histone macro-H2A.2 OS=Mus musculus GN=H2afy2 PE=1 SV=3	71705.8	199588	93311.9	131767	123054	98547.1	80107.2	64423.5	82005.2	119837	65768.5	91567.7	141171	130663	135645	106957	121601	160247	83000.2	110509
P0C0S6	2	290.61	H2afz	1.73819	0.00495476	1.29875	0.0214372	0.862459	0.0631879	P0C0S6|H2AZ_MOUSE Histone H2A.Z OS=Mus musculus GN=H2afz PE=1 SV=2	1.65667e+06	1.87796e+06	1.67651e+06	2.09362e+06	1.42842e+06	4.18882e+06	2.62151e+06	2.32738e+06	3.04107e+06	3.00119e+06	1.83512e+06	2.12903e+06	2.02133e+06	1.95055e+06	2.18989e+06	1.94956e+06	2.72978e+06	2.95397e+06	2.43499e+06	3.08276e+06
P01898;P01895;P01902	4	318.13	H2-Q10	1.40044	0.138342	1.59955	0.00640682	1.01248	0.924295	P01898|HA10_MOUSE H-2 class I histocompatibility antigen, Q10 alpha chain OS=Mus musculus GN=H2-Q10 PE=1 SV=3	1.4311e+06	1.1766e+06	1.6558e+06	1.0906e+06	919107	1.13568e+06	1.68373e+06	1.77121e+06	2.76887e+06	1.42575e+06	1.18361e+06	1.09868e+06	1.0266e+06	1.07641e+06	1.81058e+06	1.72082e+06	1.95536e+06	2.48048e+06	2.05573e+06	1.69822e+06
P02301	2	484.47	H3f3c	0.947995	0.676127	0.775341	0.0494818	0.868216	0.215546	P02301|H3C_MOUSE Histone H3.3C OS=Mus musculus GN=H3f3c PE=3 SV=3	1.34763e+07	1.54705e+07	1.21099e+07	1.69699e+07	1.38966e+07	1.77279e+07	1.61621e+07	9.31656e+06	1.17636e+07	1.32125e+07	1.24924e+07	1.79453e+07	2.01754e+07	1.71498e+07	1.50773e+07	1.13905e+07	1.25557e+07	1.14506e+07	1.23374e+07	1.64952e+07
Q61425	28	1951.05	Hadh	0.835165	0.017429	0.692576	6.24951e-06	0.886173	0.0112956	Q61425|HCDH_MOUSE Hydroxyacyl-coenzyme A dehydrogenase, mitochondrial OS=Mus musculus GN=Hadh PE=1 SV=2	4.41154e+08	4.15863e+08	4.58525e+08	4.27277e+08	3.93816e+08	4.18999e+08	3.94343e+08	3.3289e+08	3.16317e+08	3.21893e+08	4.79765e+08	4.78154e+08	5.31262e+08	4.55415e+08	4.66483e+08	3.29886e+08	3.18778e+08	3.33169e+08	3.54171e+08	3.33852e+08
Q8BMS1	72	5575.48	Hadha	0.942579	0.483943	0.71603	9.39955e-05	0.890378	0.0134645	Q8BMS1|ECHA_MOUSE Trifunctional enzyme subunit alpha, mitochondrial OS=Mus musculus GN=Hadha PE=1 SV=1	1.83264e+09	1.68021e+09	1.65696e+09	1.84681e+09	1.86714e+09	1.56793e+09	2.1943e+09	1.54132e+09	1.47014e+09	1.59996e+09	1.98371e+09	2.05665e+09	2.02347e+09	2.10788e+09	1.8058e+09	1.34949e+09	1.2948e+09	1.35457e+09	1.57717e+09	1.56817e+09
Q99JY0	52	3340.28	Hadhb	0.930097	0.224355	0.797145	0.000600572	0.906289	0.0299215	Q99JY0|ECHB_MOUSE Trifunctional enzyme subunit beta, mitochondrial OS=Mus musculus GN=Hadhb PE=1 SV=1	1.2295e+09	1.30623e+09	1.21001e+09	1.37335e+09	1.26034e+09	1.26105e+09	1.39031e+09	1.09343e+09	1.06396e+09	1.12473e+09	1.52657e+09	1.46019e+09	1.38892e+09	1.38151e+09	1.28188e+09	1.04304e+09	1.06961e+09	1.11755e+09	1.22622e+09	1.15473e+09
Q99KB8	4	156.06	Hagh	0.762283	0.00314213	0.957304	0.407123	1.16231	0.00675169	Q99KB8|GLO2_MOUSE Hydroxyacylglutathione hydrolase, mitochondrial OS=Mus musculus GN=Hagh PE=1 SV=2	4.29143e+06	4.65071e+06	4.64217e+06	4.51862e+06	3.95799e+06	3.42988e+06	2.89458e+06	2.84218e+06	3.8701e+06	3.77993e+06	3.94734e+06	3.96492e+06	3.95708e+06	3.66875e+06	3.44221e+06	3.81439e+06	3.40764e+06	3.51032e+06	4.13959e+06	3.29798e+06
Q61035;Q99KK9	4	92.93	Hars	0.971286	0.794851	1.05124	0.485718	1.00576	0.970638	Q61035|SYHC_MOUSE Histidine--tRNA ligase, cytoplasmic OS=Mus musculus GN=Hars PE=1 SV=2	483242	338898	431542	521190	479680	330920	444846	453453	405062	555534	424916	465286	406937	472917	471581	509106	494700	466511	522050	364123
O35387	3	144.14	Hax1	0.596321	0.0105893	0.8815	0.470789	1.06708	0.681968	O35387|HAX1_MOUSE HCLS1-associated protein X-1 OS=Mus musculus GN=Hax1 PE=1 SV=1	112986	148394	76729.9	95108.4	114164	69012.1	74312.4	49528.2	80468.7	53094.6	78724.9	134501	84160.8	89099.7	126486	74141.2	64063.5	80592.6	112115	121273
P01942;P06467	13	1101.44	Hba	0.968174	0.779941	1.16765	0.255121	1.10402	0.294745	P01942|HBA_MOUSE Hemoglobin subunit alpha OS=Mus musculus GN=Hba PE=1 SV=2	4.2955e+09	4.55612e+09	5.48053e+09	5.03492e+09	3.85265e+09	5.5291e+09	4.58161e+09	2.95635e+09	4.91811e+09	4.49557e+09	3.84712e+09	3.90463e+09	3.62901e+09	4.42261e+09	5.22859e+09	3.67451e+09	5.25119e+09	6.47762e+09	4.00622e+09	5.14844e+09
P02088	11	1981.95	Hbb-b1	1.09058	0.519447	1.32216	0.146127	1.16422	0.151934	P02088|HBB1_MOUSE Hemoglobin subunit beta-1 OS=Mus musculus GN=Hbb-b1 PE=1 SV=2	2.50292e+09	2.32505e+09	2.95422e+09	2.62738e+09	2.07645e+09	3.37075e+09	2.7326e+09	1.68041e+09	3.26306e+09	2.57019e+09	1.9464e+09	2.11149e+09	1.68489e+09	2.23533e+09	2.74671e+09	2.06343e+09	3.20752e+09	4.10894e+09	1.99516e+09	2.8049e+09
P02089	1	543.25	Hbb-b2	1.41402	0.167737	1.51096	0.182878	1.55273	0.0538913	P02089|HBB2_MOUSE Hemoglobin subunit beta-2 OS=Mus musculus GN=Hbb-b2 PE=1 SV=2	1.15544e+06	770336	1.25274e+06	1.25242e+06	618774	1.81505e+06	1.35699e+06	628070	2.02937e+06	1.31092e+06	487640	651355	600114	509639	1.00341e+06	486488	808388	1.46508e+06	665694	1.48824e+06
P02104	1	112.95	Hbb-y	0.910466	0.529814	1.17195	0.272569	1.22959	0.076224	P02104|HBE_MOUSE Hemoglobin subunit epsilon-Y2 OS=Mus musculus GN=Hbb-y PE=1 SV=2	400694	365132	369118	374875	256887	427110	276248	194502	389978	320689	338638	252537	259178	263342	323134	250549	352786	470741	282368	327452
P53702	2	36.49	Hccs	0.794893	0.289883	0.88881	0.41919	1.20521	0.511101	P53702|CCHL_MOUSE Cytochrome c-type heme lyase OS=Mus musculus GN=Hccs PE=1 SV=2	1.67675e+06	827834	1.99115e+06	922997	1.83077e+06	1.3297e+06	1.35788e+06	807068	1.01285e+06	1.25508e+06	1.09456e+06	1.09478e+06	916867	1.6382e+06	1.27073e+06	1.41899e+06	860698	911661	1.03673e+06	1.11823e+06
P51859	7	263.48	Hdgf	0.9126	0.381922	1.52401	0.00409557	1.30761	0.0313831	P51859|HDGF_MOUSE Hepatoma-derived growth factor OS=Mus musculus GN=Hdgf PE=1 SV=2	3.2591e+06	3.98805e+06	3.54611e+06	3.92784e+06	4.31993e+06	3.77884e+06	2.58977e+06	4.45128e+06	3.23799e+06	3.31897e+06	3.34265e+06	3.54773e+06	2.51161e+06	2.10749e+06	3.05219e+06	4.69772e+06	5.03262e+06	4.90324e+06	3.66262e+06	3.89595e+06
Q3UGR5	7	294.36	Hdhd2	0.964607	0.464068	0.890714	0.179381	0.835753	0.0514971	Q3UGR5|HDHD2_MOUSE Haloacid dehalogenase-like hydrolase domain-containing protein 2 OS=Mus musculus GN=Hdhd2 PE=1 SV=2	1.50858e+07	1.86776e+07	1.85128e+07	1.7895e+07	1.66297e+07	1.81245e+07	1.72619e+07	1.64698e+07	1.62203e+07	1.56522e+07	1.93014e+07	2.16908e+07	2.55751e+07	1.73736e+07	1.99185e+07	1.76036e+07	2.10139e+07	1.86468e+07	1.81525e+07	1.70923e+07
Q8VDJ3;A2A935	5	241.46	Hdlbp	1.44231	0.0499644	1.11862	0.0157531	0.877699	0.0536549	Q8VDJ3|VIGLN_MOUSE Vigilin OS=Mus musculus GN=Hdlbp PE=1 SV=1	916457	797927	971871	1.09983e+06	1.01482e+06	1.54035e+06	2.02044e+06	1.0367e+06	1.15857e+06	1.16832e+06	1.09877e+06	1.10919e+06	1.04071e+06	1.03146e+06	1.18975e+06	1.3059e+06	1.2515e+06	1.17683e+06	1.25649e+06	1.12798e+06
Q9D1G3	6	213.45	Hhatl	1.1984	0.580232	1.67515	0.0746772	1.23544	0.62461	Q9D1G3|HHATL_MOUSE Protein-cysteine N-palmitoyltransferase HHAT-like protein OS=Mus musculus GN=Hhatl PE=1 SV=2	1.80814e+06	2.82224e+06	1.28531e+06	717908	721111	1.90479e+06	2.47279e+06	1.68825e+06	601947	2.14608e+06	448989	1.06499e+06	1.91549e+06	886688	1.63696e+06	987661	1.98514e+06	1.97957e+06	2.785e+06	2.23501e+06
Q99L13	13	562.54	Hibadh	0.969445	0.805171	0.852877	0.028441	0.9849	0.821762	Q99L13|3HIDH_MOUSE 3-hydroxyisobutyrate dehydrogenase, mitochondrial OS=Mus musculus GN=Hibadh PE=1 SV=1	2.40408e+07	2.39314e+07	2.52299e+07	3.17047e+07	2.90434e+07	3.65972e+07	2.2041e+07	2.08254e+07	2.40359e+07	2.63577e+07	2.92907e+07	2.63198e+07	2.55351e+07	2.38467e+07	3.10114e+07	2.61512e+07	2.28544e+07	2.24133e+07	2.1981e+07	2.25946e+07
Q8QZS1	15	1203.02	Hibch	0.98858	0.759678	0.78554	8.52229e-06	0.896669	0.000627005	Q8QZS1|HIBCH_MOUSE 3-hydroxyisobutyryl-CoA hydrolase, mitochondrial OS=Mus musculus GN=Hibch PE=1 SV=1	6.02896e+07	5.61573e+07	6.15778e+07	6.0137e+07	6.05402e+07	6.13448e+07	6.48522e+07	5.32263e+07	5.75927e+07	5.82748e+07	6.69242e+07	6.51699e+07	6.69141e+07	6.9414e+07	6.47018e+07	5.51873e+07	4.98105e+07	4.94408e+07	5.29469e+07	5.42968e+07
Q9DD02	1	45.87	Hikeshi	0.381269	0.059947	1.33745	0.312181	1.21211	0.479797	Q9DD02|HIKES_MOUSE Protein Hikeshi OS=Mus musculus GN=Hikeshi PE=1 SV=1	31880	28513.9	0	24300.9	27702.5	0	15215.1	10680	5005.36	11953.2	7342.37	20466.7	36671.9	12024	16224.1	29988.1	19090.7	26089.8	17143.1	31708.4
P70349	9	437.08	Hint1	0.859811	0.144372	1.16224	0.0355009	1.1482	0.160275	P70349|HINT1_MOUSE Histidine triad nucleotide-binding protein 1 OS=Mus musculus GN=Hint1 PE=1 SV=3	2.93085e+07	3.77056e+07	3.89393e+07	4.09267e+07	3.23799e+07	3.62271e+07	2.33585e+07	3.44683e+07	3.00845e+07	2.99914e+07	3.56724e+07	3.40077e+07	2.78173e+07	2.5472e+07	3.31535e+07	3.58177e+07	3.58449e+07	3.54401e+07	3.81253e+07	3.62242e+07
Q9D0S9	5	286.69	Hint2	0.945921	0.421815	1.04353	0.529341	1.04084	0.559838	Q9D0S9|HINT2_MOUSE Histidine triad nucleotide-binding protein 2, mitochondrial OS=Mus musculus GN=Hint2 PE=1 SV=1	2.4812e+07	2.75644e+07	2.74679e+07	3.09904e+07	2.57637e+07	3.12352e+07	2.34194e+07	2.51308e+07	2.52742e+07	2.41516e+07	2.98881e+07	2.72295e+07	2.37996e+07	2.13055e+07	2.90152e+07	2.82874e+07	2.74629e+07	2.85508e+07	2.76793e+07	2.497e+07
P43275	2	184.19	Hist1h1a	1.07093	0.835479	2.11947	0.0118258	1.37617	0.383485	P43275|H11_MOUSE Histone H1.1 OS=Mus musculus GN=Hist1h1a PE=1 SV=2	314162	436337	419551	1.12117e+06	381234	541635	352166	770006	380677	817522	364980	355524	495319	482390	243738	1.0237e+06	1.15675e+06	760743	745617	429096
P43276	2	52.45	Hist1h1b	1.05331	0.634166	1.92884	0.000868691	1.37348	0.0108919	P43276|H15_MOUSE Histone H1.5 OS=Mus musculus GN=Hist1h1b PE=1 SV=2	3.64059e+06	4.06868e+06	4.3721e+06	5.52632e+06	3.28885e+06	4.62239e+06	3.84727e+06	3.94721e+06	4.45332e+06	5.14031e+06	2.7735e+06	3.00392e+06	3.11703e+06	3.12896e+06	3.19086e+06	4.83913e+06	7.71229e+06	6.45807e+06	5.40768e+06	4.92866e+06
P15864;P43277;Q07133	3	265.11	Hist1h1c	0.984164	0.847748	1.50252	0.0138347	1.25611	0.00436245	P15864|H12_MOUSE Histone H1.2 OS=Mus musculus GN=Hist1h1c PE=1 SV=2	3.84371e+07	3.92537e+07	4.4631e+07	4.2614e+07	3.48709e+07	4.74798e+07	3.13161e+07	4.061e+07	4.11461e+07	3.60905e+07	2.79254e+07	3.46119e+07	3.27569e+07	3.35393e+07	3.02343e+07	4.08947e+07	6.44257e+07	5.1231e+07	4.70269e+07	3.54249e+07
P43274	1	201.38	Hist1h1e	0.716505	0.0106323	1.10365	0.416622	1.24035	0.062104	P43274|H14_MOUSE Histone H1.4 OS=Mus musculus GN=Hist1h1e PE=1 SV=2	3.12276e+07	3.80933e+07	4.35753e+07	3.75808e+07	2.91226e+07	2.68828e+07	2.72181e+07	1.91629e+07	2.77058e+07	2.77145e+07	2.22363e+07	3.13481e+07	3.20153e+07	3.02231e+07	2.89748e+07	2.38776e+07	4.19103e+07	3.18668e+07	2.8085e+07	3.40666e+07
Q6ZWY9;P10853;Q64524;P70696	9	735.26	Hist1h2bc	0.949393	0.510566	1.19317	0.0192712	1.12468	0.0498858	Q6ZWY9|H2B1C_MOUSE Histone H2B type 1-C/E/G OS=Mus musculus GN=Hist1h2bc PE=1 SV=3	1.51555e+08	1.60701e+08	1.43842e+08	1.76022e+08	1.34822e+08	1.76915e+08	1.42277e+08	1.22913e+08	1.40089e+08	1.45935e+08	1.33476e+08	1.37431e+08	1.30969e+08	1.45786e+08	1.34257e+08	1.52646e+08	1.9444e+08	1.65144e+08	1.43875e+08	1.57539e+08
P68433	4	427.97	Hist1h3a	1.07065	0.699083	1.10096	0.407048	0.998195	0.982187	P68433|H31_MOUSE Histone H3.1 OS=Mus musculus GN=Hist1h3a PE=1 SV=2	1.53184e+06	2.21869e+06	1.5184e+06	2.74632e+06	1.84651e+06	3.02475e+06	2.19692e+06	1.44408e+06	1.96646e+06	1.92625e+06	1.24761e+06	2.24163e+06	2.42244e+06	1.95794e+06	2.00996e+06	1.8995e+06	2.27948e+06	2.20074e+06	1.98481e+06	2.51252e+06
P84228	3	474.29	Hist1h3b	1.05839	0.747979	0.916041	0.644405	1.03781	0.791266	P84228|H32_MOUSE Histone H3.2 OS=Mus musculus GN=Hist1h3b PE=1 SV=2	6.13554e+06	7.35921e+06	4.18866e+06	7.21441e+06	5.21015e+06	9.40196e+06	6.66358e+06	4.13478e+06	5.47552e+06	6.19018e+06	3.44755e+06	7.26101e+06	6.26744e+06	6.40503e+06	5.63005e+06	4.62625e+06	4.45377e+06	3.92265e+06	5.22503e+06	8.34763e+06
P62806	12	668.76	Hist1h4a	0.992114	0.902771	1.42957	0.00922719	1.11729	0.0273146	P62806|H4_MOUSE Histone H4 OS=Mus musculus GN=Hist1h4a PE=1 SV=2	2.27608e+08	2.42916e+08	2.19972e+08	2.53324e+08	2.18362e+08	2.52452e+08	2.15235e+08	1.91081e+08	2.31589e+08	2.6266e+08	2.1602e+08	2.02501e+08	2.11302e+08	2.22428e+08	1.87927e+08	2.57327e+08	3.86005e+08	3.24057e+08	2.56086e+08	2.63527e+08
P17710;Q3TRM8	26	1732.59	Hk1	1.20509	0.0219799	1.28765	0.000377079	1.07437	0.197302	P17710|HXK1_MOUSE Hexokinase-1 OS=Mus musculus GN=Hk1 PE=1 SV=3	3.57863e+07	3.10802e+07	3.67704e+07	3.19905e+07	3.59788e+07	3.95911e+07	3.91289e+07	3.52899e+07	4.57648e+07	4.70265e+07	2.97549e+07	3.01401e+07	3.27249e+07	3.66001e+07	3.0508e+07	4.27756e+07	3.8754e+07	4.22457e+07	4.28286e+07	3.90699e+07
O08528	21	1315.38	Hk2	1.05742	0.350644	0.969358	0.658724	0.961001	0.524405	O08528|HXK2_MOUSE Hexokinase-2 OS=Mus musculus GN=Hk2 PE=1 SV=1	3.93988e+07	3.57179e+07	3.45757e+07	3.56961e+07	4.15283e+07	3.66494e+07	4.21248e+07	3.45609e+07	4.38226e+07	4.04925e+07	3.8322e+07	3.71658e+07	3.81973e+07	4.586e+07	3.49571e+07	3.82798e+07	3.08102e+07	4.13335e+07	4.01977e+07	3.79211e+07
P22907	1	59.17	Hmbs	0.849587	0.196273	1.0124	0.847955	0.99296	0.882689	P22907|HEM3_MOUSE Porphobilinogen deaminase OS=Mus musculus GN=Hmbs PE=1 SV=2	69373.6	85874	71624.7	63749.8	53944.4	78096.2	58738.6	53001.9	48167.4	54735	58984.9	77925.3	70638.1	65218.1	74242.9	68813.8	71252.5	80391.7	66308.2	64545.7
P17095	2	99.13	Hmga1	0.811654	0.160659	1.80944	0.00126298	1.2674	0.0584619	P17095|HMGA1_MOUSE High mobility group protein HMG-I/HMG-Y OS=Mus musculus GN=Hmga1 PE=1 SV=4	1.20249e+06	1.83842e+06	1.37887e+06	2.00357e+06	1.73894e+06	1.51705e+06	868170	1.62022e+06	1.21736e+06	1.40215e+06	1.35444e+06	1.37104e+06	1.19045e+06	1.18414e+06	1.34013e+06	2.23434e+06	2.71549e+06	2.87124e+06	2.13323e+06	1.69883e+06
P63158	5	305.76	Hmgb1	1.08017	0.483621	1.39001	0.000826334	1.14928	0.0742445	P63158|HMGB1_MOUSE High mobility group protein B1 OS=Mus musculus GN=Hmgb1 PE=1 SV=2	7.64519e+06	8.39469e+06	6.74266e+06	9.67279e+06	8.21315e+06	1.08426e+07	6.68184e+06	9.7285e+06	9.11243e+06	7.56346e+06	7.46556e+06	7.48715e+06	6.74568e+06	6.5305e+06	7.15723e+06	9.70221e+06	9.59975e+06	1.15879e+07	9.78955e+06	8.50767e+06
P38060;Q8JZS7	8	488.02	Hmgcl	0.996674	0.955471	0.830692	0.0405841	0.905536	0.229664	P38060|HMGCL_MOUSE Hydroxymethylglutaryl-CoA lyase, mitochondrial OS=Mus musculus GN=Hmgcl PE=1 SV=2	3.52216e+06	4.69508e+06	4.0146e+06	4.34322e+06	4.47543e+06	4.61296e+06	3.881e+06	3.96556e+06	4.18128e+06	4.33967e+06	3.9377e+06	4.51678e+06	5.00886e+06	5.43611e+06	4.347e+06	3.99351e+06	3.5778e+06	3.27413e+06	4.23093e+06	4.23428e+06
Q9JL35	3	119.11	Hmgn5	0.751435	0.212345	1.47879	0.00828947	1.09677	0.36218	Q9JL35|HMGN5_MOUSE High mobility group nucleosome-binding domain-containing protein 5 OS=Mus musculus GN=Hmgn5 PE=1 SV=2	164788	161950	214089	207330	224206	98464.1	110894	276759	135568	108981	201636	200474	157531	145332	181593	292024	303654	295932	215679	203758
O70252	1	26.01	Hmox2	1.102	0.566836	2.086	0.00349745	1.38547	0.204226	O70252|HMOX2_MOUSE Heme oxygenase 2 OS=Mus musculus GN=Hmox2 PE=1 SV=1	243693	281703	179142	117316	279869	193716	249289	246985	212349	311754	137505	196062	146409	84403.8	230818	210841	374521	348788	409142	315493
P97825	1	21.69	Hn1	0.930236	0.856871	1.56243	0.145861	1.92243	0.14009	P97825|HN1_MOUSE Hematological and neurological expressed 1 protein OS=Mus musculus GN=Hn1 PE=1 SV=3	237523	536110	189686	658171	151890	668888	246851	235420	217009	281495	157233	386546	147191	100570	130926	169236	261583	278515	405055	326896
Q9CX86	2	109.3	Hnrnpa0	1.00897	0.940721	1.33866	0.020907	1.04276	0.814901	Q9CX86|ROA0_MOUSE Heterogeneous nuclear ribonucleoprotein A0 OS=Mus musculus GN=Hnrnpa0 PE=1 SV=1	746344	1.11238e+06	648459	1.05924e+06	1.07982e+06	1.12693e+06	888409	952000	873027	847563	1.0311e+06	1.1312e+06	708974	759605	824856	1.27546e+06	1.27582e+06	1.29739e+06	938786	1.17723e+06
P49312	4	321.59	Hnrnpa1	0.866802	0.20618	1.47062	0.00272296	1.22015	0.0729193	P49312|ROA1_MOUSE Heterogeneous nuclear ribonucleoprotein A1 OS=Mus musculus GN=Hnrnpa1 PE=1 SV=2	2.53063e+06	3.39639e+06	2.94148e+06	3.66111e+06	2.80036e+06	3.21895e+06	1.93096e+06	2.92661e+06	2.65795e+06	2.55357e+06	2.85737e+06	2.50715e+06	2.32544e+06	1.97893e+06	2.8951e+06	4.09683e+06	3.93702e+06	3.98415e+06	3.55462e+06	2.9042e+06
O88569	15	1020.08	Hnrnpa2b1	0.866193	0.136463	1.40937	0.00169872	1.23398	0.0393071	O88569|ROA2_MOUSE Heterogeneous nuclear ribonucleoproteins A2/B1 OS=Mus musculus GN=Hnrnpa2b1 PE=1 SV=2	3.33516e+07	4.50573e+07	3.96595e+07	4.90563e+07	4.03987e+07	4.33722e+07	3.08688e+07	3.53663e+07	3.41793e+07	3.59689e+07	3.77382e+07	3.58978e+07	3.00726e+07	2.88031e+07	3.56622e+07	4.9339e+07	5.36679e+07	4.95141e+07	4.49467e+07	3.95509e+07
Q8BG05	9	548.32	Hnrnpa3	0.922307	0.42022	1.13608	0.088294	1.07538	0.462294	Q8BG05|ROA3_MOUSE Heterogeneous nuclear ribonucleoprotein A3 OS=Mus musculus GN=Hnrnpa3 PE=1 SV=1	1.47618e+07	1.98368e+07	1.72785e+07	2.2079e+07	1.92231e+07	2.10672e+07	1.53797e+07	1.87057e+07	1.59059e+07	1.48813e+07	2.02552e+07	1.81798e+07	1.82315e+07	1.42684e+07	1.57131e+07	2.10417e+07	2.06718e+07	2.02181e+07	1.78906e+07	1.86165e+07
Q99020	6	321.32	Hnrnpab	1.03373	0.72803	1.20742	0.143726	1.18774	0.101532	Q99020|ROAA_MOUSE Heterogeneous nuclear ribonucleoprotein A/B OS=Mus musculus GN=Hnrnpab PE=1 SV=1	5.63349e+06	6.6356e+06	6.9107e+06	7.73913e+06	6.40123e+06	8.58455e+06	6.95175e+06	6.97802e+06	5.31463e+06	6.61509e+06	5.90706e+06	5.93482e+06	4.4138e+06	4.79158e+06	7.00622e+06	8.0488e+06	7.86786e+06	6.93803e+06	5.4146e+06	5.60307e+06
Q9Z204	5	289.48	Hnrnpc	0.980878	0.7689	1.27879	0.0186971	0.970472	0.837075	Q9Z204|HNRPC_MOUSE Heterogeneous nuclear ribonucleoproteins C1/C2 OS=Mus musculus GN=Hnrnpc PE=1 SV=1	3.04821e+06	3.56336e+06	2.97742e+06	3.44063e+06	3.27896e+06	3.27752e+06	2.67649e+06	3.07589e+06	3.7443e+06	3.22253e+06	3.93966e+06	3.79706e+06	2.70817e+06	2.72324e+06	3.63666e+06	4.44804e+06	4.89763e+06	4.11014e+06	3.91266e+06	4.12139e+06
Q60668	4	227.05	Hnrnpd	0.98504	0.871015	1.14672	0.128451	1.09751	0.319578	Q60668|HNRPD_MOUSE Heterogeneous nuclear ribonucleoprotein D0 OS=Mus musculus GN=Hnrnpd PE=1 SV=2	4.25947e+06	4.91068e+06	5.28597e+06	6.46179e+06	5.31659e+06	5.80273e+06	4.18025e+06	5.69566e+06	5.34773e+06	4.81566e+06	5.27112e+06	5.03597e+06	4.23854e+06	4.20611e+06	5.15193e+06	6.4171e+06	6.17145e+06	5.16856e+06	4.9842e+06	4.66952e+06
Q9Z130	1	80.64	Hnrnpdl	0.645085	0.120319	0.86972	0.454784	1.29355	0.0279753	Q9Z130|HNRDL_MOUSE Heterogeneous nuclear ribonucleoprotein D-like OS=Mus musculus GN=Hnrnpdl PE=1 SV=1	783432	711693	784775	767318	775537	1649.09	674854	286123	624365	879010	481041	534503	479672	635345	824686	547719	230539	536141	628110	627729
Q9Z2X1	4	383.1	Hnrnpf	0.935082	0.594522	1.33283	0.00379461	1.25348	0.0950514	Q9Z2X1|HNRPF_MOUSE Heterogeneous nuclear ribonucleoprotein F OS=Mus musculus GN=Hnrnpf PE=1 SV=3	480499	771268	680795	878302	655511	810464	537293	579080	633746	680762	498648	596761	491735	624809	553450	752923	705838	611197	828706	787141
P70333	2	338.5	Hnrnph2	0.975774	0.879202	1.13131	0.449395	0.961593	0.625252	P70333|HNRH2_MOUSE Heterogeneous nuclear ribonucleoprotein H2 OS=Mus musculus GN=Hnrnph2 PE=1 SV=1	174185	226799	187065	265910	276253	203617	164024	308454	261984	164752	208354	219343	253767	264577	229313	293598	347862	332011	160194	196021
P61979	13	864.18	Hnrnpk	0.908703	0.221308	1.17149	0.0141364	1.08669	0.244695	P61979|HNRPK_MOUSE Heterogeneous nuclear ribonucleoprotein K OS=Mus musculus GN=Hnrnpk PE=1 SV=1	1.47412e+07	1.8216e+07	1.69139e+07	1.97097e+07	1.57223e+07	1.54289e+07	1.34104e+07	1.82036e+07	1.49103e+07	1.55619e+07	1.68885e+07	1.73085e+07	1.51232e+07	1.40671e+07	1.5111e+07	1.99552e+07	1.85679e+07	1.90397e+07	1.81369e+07	1.62598e+07
Q8R081	9	564.78	Hnrnpl	1.06757	0.327587	1.16567	0.00990694	1.09542	0.200828	Q8R081|HNRPL_MOUSE Heterogeneous nuclear ribonucleoprotein L OS=Mus musculus GN=Hnrnpl PE=1 SV=2	4.07615e+06	3.95147e+06	3.5498e+06	4.8873e+06	4.6196e+06	4.50215e+06	4.03909e+06	4.49263e+06	4.84079e+06	4.63429e+06	3.97049e+06	4.12067e+06	3.71031e+06	3.82632e+06	3.61986e+06	4.77536e+06	4.89302e+06	4.31373e+06	3.95705e+06	4.49721e+06
Q9D0E1	9	406.76	Hnrnpm	0.834115	0.0245273	1.52513	0.000134111	1.32456	0.00271946	Q9D0E1|HNRPM_MOUSE Heterogeneous nuclear ribonucleoprotein M OS=Mus musculus GN=Hnrnpm PE=1 SV=3	2.14682e+06	2.39458e+06	2.42124e+06	2.75662e+06	2.06516e+06	1.90532e+06	1.77808e+06	2.22402e+06	1.96262e+06	1.95952e+06	1.93869e+06	1.91303e+06	1.67657e+06	1.8099e+06	1.55866e+06	2.78901e+06	2.7935e+06	3.04817e+06	2.58673e+06	2.3515e+06
Q8VEK3	16	931.44	Hnrnpu	1.08936	0.14985	1.12781	0.0190057	1.07099	0.161489	Q8VEK3|HNRPU_MOUSE Heterogeneous nuclear ribonucleoprotein U OS=Mus musculus GN=Hnrnpu PE=1 SV=1	1.39148e+07	1.43615e+07	1.34927e+07	1.55588e+07	1.44789e+07	1.8101e+07	1.43053e+07	1.40667e+07	1.55947e+07	1.61558e+07	1.16189e+07	1.33876e+07	1.33198e+07	1.45598e+07	1.41608e+07	1.6108e+07	1.48483e+07	1.54752e+07	1.45261e+07	1.46585e+07
Q00PI9	2	94.07	Hnrnpul2	1.27106	0.469148	2.07846	0.000101085	1.33089	0.0807544	Q00PI9|HNRL2_MOUSE Heterogeneous nuclear ribonucleoprotein U-like protein 2 OS=Mus musculus GN=Hnrnpul2 PE=1 SV=2	190233	112512	134590	149331	176370	12921.7	156417	212600	273748	314177	119720	149357	132209	85321.9	86720.2	248257	277868	237822	211405	216285
Q9QWW1	1	48.29	Homer2	1.09835	0.663568	1.60948	0.0288317	1.03859	0.815411	Q9QWW1|HOME2_MOUSE Homer protein homolog 2 OS=Mus musculus GN=Homer2 PE=1 SV=1	169205	411891	178005	343386	227583	236275	315551	313013	205576	390462	193679	457849	147474	172216	309433	443213	432493	388956	385394	411129
Q61646	10	439.51	Hp	0.1569	0.0466817	1.42465	0.623274	4.49803	0.0640175	Q61646|HPT_MOUSE Haptoglobin OS=Mus musculus GN=Hp PE=1 SV=1	3.61551e+07	1.37685e+07	4.4639e+07	1.34266e+07	2.41e+06	2.93947e+06	4.00614e+06	6.70344e+06	1.22075e+06	2.45183e+06	5.81256e+06	8.60668e+06	3.87146e+06	2.59558e+06	3.65766e+06	3.48374e+06	2.26535e+07	4.30501e+06	2.97173e+06	1.55243e+06
Q3TEA8	5	226.11	Hp1bp3	1.01935	0.564258	1.18839	0.0149853	0.98387	0.840855	Q3TEA8|HP1B3_MOUSE Heterochromatin protein 1-binding protein 3 OS=Mus musculus GN=Hp1bp3 PE=1 SV=1	2.87659e+06	2.64497e+06	2.64603e+06	2.56976e+06	2.68663e+06	2.74984e+06	2.84538e+06	2.55425e+06	2.61055e+06	2.92372e+06	2.80199e+06	2.62879e+06	2.93732e+06	3.02665e+06	2.24933e+06	3.02608e+06	3.57179e+06	3.17573e+06	3.31235e+06	3.12845e+06
P00493	1	59.07	Hprt1	1.7661	0.00160502	2.57125	9.74696e-05	1.56063	0.0224736	P00493|HPRT_MOUSE Hypoxanthine-guanine phosphoribosyltransferase OS=Mus musculus GN=Hprt1 PE=1 SV=3	116983	104846	81373.7	136735	109383	142129	183757	200322	237616	206334	43611.3	77703.5	100291	74807.1	55575	149176	181577	166154	186890	221250
Q91X72	18	982.44	Hpx	0.982535	0.893567	1.45373	0.0347864	1.3158	0.0648988	Q91X72|HEMO_MOUSE Hemopexin OS=Mus musculus GN=Hpx PE=1 SV=2	1.59512e+08	1.27238e+08	1.70649e+08	1.20224e+08	9.87208e+07	1.67006e+08	1.0142e+08	1.24538e+08	1.27248e+08	1.44318e+08	1.01692e+08	9.84623e+07	9.27403e+07	8.62767e+07	1.34845e+08	1.34022e+08	1.99947e+08	1.74713e+08	1.25787e+08	1.12774e+08
Q9ESB3	8	435.97	Hrg	1.29355	0.00912028	1.57855	0.000932969	1.03899	0.572802	Q9ESB3|HRG_MOUSE Histidine-rich glycoprotein OS=Mus musculus GN=Hrg PE=1 SV=2	2.61099e+06	3.04177e+06	2.83679e+06	2.72476e+06	3.1243e+06	4.00983e+06	3.17329e+06	3.86098e+06	4.31122e+06	3.19246e+06	2.3804e+06	2.89134e+06	2.42221e+06	2.57995e+06	3.52659e+06	4.23985e+06	4.33893e+06	4.96571e+06	4.65423e+06	3.58604e+06
Q8K3A0	3	193.93	Hscb	0.728714	0.00467898	1.00647	0.950969	1.06681	0.543929	Q8K3A0|HSC20_MOUSE Iron-sulfur cluster co-chaperone protein HscB, mitochondrial OS=Mus musculus GN=Hscb PE=1 SV=2	1.22841e+06	1.36384e+06	1.14097e+06	1.61768e+06	1.576e+06	1.07853e+06	1.00065e+06	925831	1.03648e+06	1.00623e+06	1.54024e+06	1.31032e+06	971488	1.14037e+06	1.53071e+06	1.20908e+06	1.1956e+06	1.30759e+06	1.23477e+06	1.58808e+06
O08756	12	1128.43	Hsd17b10	0.853404	0.0327553	0.840028	0.00523808	0.973316	0.633949	O08756|HCD2_MOUSE 3-hydroxyacyl-CoA dehydrogenase type-2 OS=Mus musculus GN=Hsd17b10 PE=1 SV=4	5.05039e+07	5.834e+07	4.86274e+07	5.45709e+07	4.92462e+07	5.11035e+07	4.93911e+07	3.99606e+07	4.13573e+07	4.11722e+07	5.56051e+07	5.19208e+07	5.88956e+07	5.55083e+07	4.65219e+07	4.48612e+07	4.42536e+07	4.30841e+07	4.52513e+07	4.80566e+07
P51660	6	277.8	Hsd17b4	0.996104	0.968455	0.790745	0.0155363	0.843923	0.102404	P51660|DHB4_MOUSE Peroxisomal multifunctional enzyme type 2 OS=Mus musculus GN=Hsd17b4 PE=1 SV=3	4.94071e+06	3.76507e+06	3.96411e+06	4.11405e+06	3.31295e+06	4.67538e+06	4.54678e+06	3.51401e+06	3.27149e+06	4.01095e+06	4.62899e+06	4.55707e+06	5.43665e+06	5.38452e+06	3.80643e+06	3.38349e+06	3.57172e+06	4.0007e+06	3.88491e+06	3.98973e+06
P50171	10	733.42	Hsd17b8	0.9354	0.102001	0.848089	0.0198422	0.953898	0.333351	P50171|DHB8_MOUSE Estradiol 17-beta-dehydrogenase 8 OS=Mus musculus GN=Hsd17b8 PE=1 SV=2	1.98163e+07	1.95828e+07	1.87206e+07	1.97945e+07	1.93781e+07	1.87909e+07	2.04546e+07	1.77232e+07	1.70961e+07	1.69425e+07	2.26754e+07	2.07926e+07	2.09197e+07	2.00142e+07	1.75925e+07	1.74755e+07	1.54072e+07	1.62039e+07	1.8257e+07	1.91568e+07
Q8BTX9	1	27.49	Hsdl1	15.6506	0.033435	0.224854	0.000465197	0.0378613	5.64436e-07	Q8BTX9|HSDL1_MOUSE Inactive hydroxysteroid dehydrogenase-like protein 1 OS=Mus musculus GN=Hsdl1 PE=1 SV=1	73327.9	169837	167684	104735	231803	5.52483e+06	2.72122e+06	1.03062e+06	1.11522e+06	1.30516e+06	2.73836e+06	3.19671e+06	4.38277e+06	4.33217e+06	5.09014e+06	972205	273449	498028	2.11517e+06	579788
Q2TPA8	21	1545.85	Hsdl2	0.973061	0.560415	0.771459	6.91256e-05	0.948166	0.0742057	Q2TPA8|HSDL2_MOUSE Hydroxysteroid dehydrogenase-like protein 2 OS=Mus musculus GN=Hsdl2 PE=1 SV=1	5.44589e+07	4.89219e+07	5.48089e+07	5.46622e+07	5.26271e+07	5.31486e+07	5.89693e+07	5.05095e+07	4.77598e+07	4.794e+07	5.80848e+07	5.58917e+07	5.56363e+07	5.71672e+07	5.32121e+07	4.70271e+07	3.78543e+07	4.4096e+07	4.39328e+07	4.30922e+07
P07901	21	1569.56	Hsp90aa1	1.07162	0.265214	1.17845	0.00157836	1.10988	0.0782583	P07901|HS90A_MOUSE Heat shock protein HSP 90-alpha OS=Mus musculus GN=Hsp90aa1 PE=1 SV=4	2.49566e+07	2.11482e+07	2.59338e+07	2.34609e+07	2.0293e+07	2.73181e+07	2.20465e+07	2.45388e+07	2.57603e+07	2.44215e+07	2.0501e+07	1.98042e+07	2.15086e+07	2.08675e+07	2.16477e+07	2.64344e+07	2.47135e+07	2.58746e+07	2.29802e+07	2.29443e+07
P11499	30	2644.41	Hsp90ab1	1.14653	0.00759986	1.1132	0.00594924	1.05787	0.0653416	P11499|HS90B_MOUSE Heat shock protein HSP 90-beta OS=Mus musculus GN=Hsp90ab1 PE=1 SV=3	1.80871e+08	1.78533e+08	1.85196e+08	1.74939e+08	1.65329e+08	1.95273e+08	2.0067e+08	1.83904e+08	2.19087e+08	2.15595e+08	1.59617e+08	1.61494e+08	1.76118e+08	1.69468e+08	1.69767e+08	1.93536e+08	1.86302e+08	1.97141e+08	1.76902e+08	1.77276e+08
P08113	20	1432.45	Hsp90b1	1.15165	0.0390097	1.38524	0.000463793	1.0613	0.191734	P08113|ENPL_MOUSE Endoplasmin OS=Mus musculus GN=Hsp90b1 PE=1 SV=2	3.48343e+07	3.66698e+07	3.98825e+07	3.47416e+07	3.3148e+07	4.63417e+07	3.47352e+07	4.07761e+07	4.23465e+07	4.22632e+07	3.19749e+07	3.40876e+07	3.51975e+07	3.14965e+07	3.61655e+07	5.07029e+07	5.10753e+07	4.86845e+07	4.2452e+07	4.10825e+07
Q9CZJ2	3	92.05	Hspa12b	0.972923	0.878406	0.586392	0.0168264	0.923481	0.676649	Q9CZJ2|HS12B_MOUSE Heat shock 70 kDa protein 12B OS=Mus musculus GN=Hspa12b PE=1 SV=1	259484	267883	153377	268141	310121	299811	293726	121957	216747	292676	210026	309146	202178	390556	251422	145702	150032	142632	148416	212662
P17879	1	564.52	Hspa1b	0.623629	0.186563	1.20947	0.493772	1.49153	0.33235	P17879|HS71B_MOUSE Heat shock 70 kDa protein 1B OS=Mus musculus GN=Hspa1b PE=1 SV=3	758021	320720	791478	519598	197026	450509	283493	506606	194332	178291	350098	323480	386516	232275	441991	231453	433769	705319	533201	193913
P16627	1	481.95	Hspa1l	2.35418	0.0173651	0.482176	5.80299e-05	0.219917	8.62763e-05	P16627|HS71L_MOUSE Heat shock 70 kDa protein 1-like OS=Mus musculus GN=Hspa1l PE=1 SV=4	75413.5	144935	105062	96111.5	257912	472281	255234	323021	166982	381996	500208	591810	697404	608043	692037	266700	304824	252719	369460	295980
Q61316	21	1481.26	Hspa4	0.988584	0.807535	1.10015	0.0890685	1.06466	0.0530286	Q61316|HSP74_MOUSE Heat shock 70 kDa protein 4 OS=Mus musculus GN=Hspa4 PE=1 SV=1	2.12412e+07	2.23822e+07	2.33213e+07	2.17006e+07	2.25232e+07	2.2899e+07	2.00987e+07	1.93522e+07	2.36504e+07	2.38992e+07	2.16292e+07	2.16899e+07	2.16337e+07	1.97575e+07	1.97065e+07	2.60515e+07	2.34302e+07	2.29753e+07	1.99762e+07	2.24412e+07
P48722	5	295.9	Hspa4l	0.878665	0.482265	0.857786	0.121859	0.966064	0.696772	P48722|HS74L_MOUSE Heat shock 70 kDa protein 4L OS=Mus musculus GN=Hspa4l PE=1 SV=2	758596	563805	848575	661053	613739	279855	556813	554240	776817	859951	654310	805200	584857	733714	788731	725193	572013	527027	538478	696851
P20029	23	2069.38	Hspa5	1.02519	0.714143	1.15894	0.0164899	1.00108	0.984617	P20029|GRP78_MOUSE 78 kDa glucose-regulated protein OS=Mus musculus GN=Hspa5 PE=1 SV=3	1.09258e+08	1.15021e+08	1.28296e+08	1.33345e+08	1.1144e+08	1.28895e+08	9.88717e+07	1.2019e+08	1.30755e+08	1.33693e+08	1.14161e+08	1.20171e+08	1.12059e+08	1.22132e+08	1.28196e+08	1.44837e+08	1.3104e+08	1.56191e+08	1.35171e+08	1.24319e+08
P63017	29	3243.37	Hspa8	1.0007	0.98852	1.0204	0.396806	0.999008	0.963621	P63017|HSP7C_MOUSE Heat shock cognate 71 kDa protein OS=Mus musculus GN=Hspa8 PE=1 SV=1	2.07344e+08	2.21273e+08	2.26843e+08	2.15657e+08	2.20271e+08	2.49551e+08	1.93422e+08	2.03524e+08	2.28035e+08	2.1762e+08	2.23068e+08	2.23882e+08	2.14306e+08	2.07703e+08	2.23512e+08	2.37755e+08	2.20066e+08	2.21236e+08	2.1933e+08	2.16372e+08
P38647	48	3732.71	Hspa9	1.11875	0.167434	0.863631	0.0135828	0.899448	0.0540099	P38647|GRP75_MOUSE Stress-70 protein, mitochondrial OS=Mus musculus GN=Hspa9 PE=1 SV=3	2.98701e+08	2.81422e+08	3.27518e+08	3.2222e+08	3.24316e+08	4.37594e+08	3.24199e+08	3.31816e+08	3.28541e+08	3.16591e+08	3.89883e+08	3.35502e+08	3.33961e+08	3.14474e+08	3.54103e+08	3.24917e+08	2.83215e+08	3.03172e+08	2.81736e+08	2.99248e+08
P14602	13	712.42	Hspb1	0.708398	0.00109017	1.13197	0.0996497	1.24111	0.0140613	P14602|HSPB1_MOUSE Heat shock protein beta-1 OS=Mus musculus GN=Hspb1 PE=1 SV=3	7.52922e+07	7.81067e+07	9.32245e+07	8.94747e+07	7.43491e+07	6.74954e+07	5.07194e+07	6.08761e+07	5.69159e+07	5.4753e+07	7.39323e+07	6.84668e+07	5.75399e+07	5.8951e+07	7.18186e+07	7.74565e+07	8.62274e+07	7.31139e+07	6.98983e+07	6.76547e+07
Q99PR8	4	168.04	Hspb2	0.929115	0.566253	1.25302	0.00732122	1.16831	0.240211	Q99PR8|HSPB2_MOUSE Heat shock protein beta-2 OS=Mus musculus GN=Hspb2 PE=1 SV=2	2.34198e+06	3.70119e+06	2.99225e+06	4.13133e+06	3.7869e+06	2.67305e+06	2.54333e+06	3.49474e+06	3.82e+06	3.22078e+06	2.91266e+06	3.24115e+06	2.64789e+06	2.67508e+06	3.03452e+06	3.67982e+06	3.993e+06	3.99481e+06	3.42247e+06	3.09289e+06
Q9QZ57	2	85.52	Hspb3	1.14446	0.552153	1.01684	0.886952	0.853266	0.318818	Q9QZ57|HSPB3_MOUSE Heat shock protein beta-3 OS=Mus musculus GN=Hspb3 PE=2 SV=1	236267	356063	160961	385848	249419	440014	153822	375900	355972	263447	330473	345463	291372	245761	414278	333681	281248	362814	273517	403483
Q5EBG6	8	713.76	Hspb6	0.659306	0.00204124	0.993688	0.893594	1.19722	0.0651339	Q5EBG6|HSPB6_MOUSE Heat shock protein beta-6 OS=Mus musculus GN=Hspb6 PE=1 SV=1	5.08403e+07	6.62528e+07	6.36508e+07	7.28134e+07	5.05669e+07	3.61434e+07	3.81799e+07	4.45727e+07	4.1288e+07	4.03267e+07	5.58625e+07	5.26532e+07	4.72328e+07	4.70714e+07	5.12046e+07	4.69416e+07	4.8432e+07	5.20537e+07	5.60117e+07	4.89822e+07
P35385	6	476.16	Hspb7	0.712538	0.0316003	1.08266	0.489618	1.21622	0.123137	P35385|HSPB7_MOUSE Heat shock protein beta-7 OS=Mus musculus GN=Hspb7 PE=1 SV=3	9.36205e+06	1.23512e+07	1.26213e+07	1.42516e+07	1.05036e+07	1.20034e+07	6.12015e+06	8.74173e+06	7.68278e+06	7.55562e+06	1.15631e+07	1.12641e+07	7.73944e+06	7.66307e+06	1.03551e+07	9.98282e+06	1.21766e+07	9.04429e+06	1.22786e+07	9.11851e+06
Q9JK92	5	173.34	Hspb8	0.824209	0.0729504	0.879044	0.037758	1.03525	0.689067	Q9JK92|HSPB8_MOUSE Heat shock protein beta-8 OS=Mus musculus GN=Hspb8 PE=1 SV=1	5.03562e+06	6.45558e+06	5.92112e+06	7.37691e+06	6.02193e+06	6.3731e+06	4.17311e+06	5.12351e+06	4.78636e+06	4.93875e+06	6.62774e+06	5.84815e+06	5.51351e+06	5.64431e+06	6.1283e+06	5.19661e+06	4.99423e+06	4.77017e+06	6.0185e+06	5.18262e+06
P63038	45	3984.18	Hspd1	0.965585	0.454318	0.808039	0.000221854	0.871464	0.00419916	P63038|CH60_MOUSE 60 kDa heat shock protein, mitochondrial OS=Mus musculus GN=Hspd1 PE=1 SV=1	4.12387e+08	3.99542e+08	4.03222e+08	3.70447e+08	3.9466e+08	4.30775e+08	3.38626e+08	4.00545e+08	3.80542e+08	3.6162e+08	4.54873e+08	4.64215e+08	4.58302e+08	4.07509e+08	4.87437e+08	3.56766e+08	3.67941e+08	3.82209e+08	3.68558e+08	3.60661e+08
Q64433	5	216.33	Hspe1	0.596496	0.00721598	0.935557	0.492417	1.21553	0.164633	Q64433|CH10_MOUSE 10 kDa heat shock protein, mitochondrial OS=Mus musculus GN=Hspe1 PE=1 SV=2	6.47829e+07	7.76216e+07	9.02445e+07	9.50401e+07	5.55367e+07	6.15047e+07	3.56812e+07	4.76357e+07	4.1112e+07	4.26589e+07	7.27785e+07	6.60381e+07	6.06979e+07	4.9518e+07	6.62415e+07	4.82167e+07	6.7907e+07	5.41433e+07	6.92092e+07	5.54806e+07
Q05793	77	4227.79	Hspg2	1.14126	0.0190969	1.05086	0.274661	0.956565	0.30635	Q05793|PGBM_MOUSE Basement membrane-specific heparan sulfate proteoglycan core protein OS=Mus musculus GN=Hspg2 PE=1 SV=1	8.44828e+07	7.39346e+07	8.96787e+07	7.97684e+07	9.07553e+07	1.04431e+08	9.21454e+07	8.93307e+07	9.62615e+07	9.5584e+07	8.72615e+07	9.06064e+07	8.53691e+07	9.17075e+07	8.26836e+07	1.04907e+08	9.24098e+07	8.94995e+07	8.68727e+07	8.61945e+07
Q61699	3	121.89	Hsph1	0.664298	0.0738617	0.941594	0.701539	1.12537	0.48932	Q61699|HS105_MOUSE Heat shock protein 105 kDa OS=Mus musculus GN=Hsph1 PE=1 SV=2	584487	512206	869232	549962	453479	610984	318798	475917	284701	282144	668810	508915	472311	671942	316598	465385	649129	481185	414901	473866
Q9JIY5	5	285.1	Htra2	0.844839	0.00559914	0.96953	0.596003	1.01097	0.805013	Q9JIY5|HTRA2_MOUSE Serine protease HTRA2, mitochondrial OS=Mus musculus GN=Htra2 PE=1 SV=2	3.36562e+06	3.94498e+06	3.75625e+06	3.58744e+06	3.69475e+06	3.0333e+06	2.91086e+06	3.56316e+06	2.97077e+06	3.02389e+06	3.82453e+06	4.05902e+06	3.41553e+06	3.05102e+06	3.79988e+06	3.56452e+06	3.60939e+06	3.75396e+06	3.47132e+06	3.19776e+06
P06330;P01749	2	132.92	HVM51_MOUSE	1.37449	0.0199602	1.67343	0.0871266	0.87451	0.505004	P06330|HVM51_MOUSE Ig heavy chain V region AC38 205.12 OS=Mus musculus PE=1 SV=1	1.10436e+06	1.44856e+06	1.30585e+06	1.16101e+06	1.46378e+06	1.48711e+06	1.75715e+06	1.42384e+06	2.05659e+06	2.18689e+06	2.03591e+06	1.68181e+06	1.07535e+06	998470	1.62239e+06	2.25307e+06	2.81547e+06	4.11526e+06	1.34938e+06	1.87352e+06
P18525	1	32.76	HVM54_MOUSE	0.264968	0.489257	179.56	0.324847	32.5632	0.824518	P18525|HVM54_MOUSE Ig heavy chain V region 5-84 OS=Mus musculus PE=1 SV=1	173455	0	0	667.05	0	0	0	0	11113.1	35023.7	0	4786.27	560.937	0	0	0	34604.9	5790.87	0	919749
Q9JKR6	2	71.39	Hyou1	1.50054	0.2175	0.93882	0.745834	0.87681	0.141004	Q9JKR6|HYOU1_MOUSE Hypoxia up-regulated protein 1 OS=Mus musculus GN=Hyou1 PE=1 SV=1	109968	139050	144738	153822	131886	398116	140975	205804	137667	137001	143136	134698	180639	171468	144986	244292	142808	138700	118019	83698.1
Q8BU30	1	27.32	Iars	3.02698	0.211869	1.40317	0.501	0.526907	0.472043	Q8BU30|SYIC_MOUSE Isoleucine--tRNA ligase, cytoplasmic OS=Mus musculus GN=Iars PE=1 SV=2	25126.4	19496.6	8561.21	6816.94	11964.3	232.121	42646.3	24857.1	26079.7	124023	3324.82	26326.8	23320.4	0	83609	25196.6	33833	48728.3	46964.8	36924.3
Q8BIJ6	17	1022.1	Iars2	1.2532	0.0716749	0.75267	0.0460802	0.909039	0.442051	Q8BIJ6|SYIM_MOUSE Isoleucine--tRNA ligase, mitochondrial OS=Mus musculus GN=Iars2 PE=1 SV=1	1.08359e+07	9.63287e+06	7.99246e+06	7.55433e+06	8.68727e+06	1.28558e+07	1.3531e+07	8.77197e+06	9.53764e+06	1.13254e+07	7.94332e+06	7.77574e+06	1.0429e+07	1.2001e+07	1.10269e+07	5.80976e+06	6.20344e+06	8.08433e+06	8.05303e+06	8.86271e+06
Q8CAK1	5	231.11	Iba57	0.910365	0.14306	0.690632	0.00018375	0.852701	0.022561	Q8CAK1|CAF17_MOUSE Putative transferase CAF17 homolog, mitochondrial OS=Mus musculus GN=Iba57 PE=1 SV=1	3.78366e+06	3.29643e+06	3.40067e+06	3.17878e+06	3.25268e+06	2.64752e+06	3.41041e+06	2.89394e+06	3.44455e+06	2.99988e+06	4.22811e+06	4.16869e+06	4.12459e+06	4.02527e+06	3.28704e+06	2.77953e+06	2.62699e+06	2.65358e+06	3.01166e+06	2.62601e+06
Q9DBD0	5	247.52	Ica	1.23961	0.22542	1.95342	0.000291105	1.32686	0.00464022	Q9DBD0|ICA_MOUSE Inhibitor of carbonic anhydrase OS=Mus musculus GN=Ica PE=1 SV=1	540163	607968	782262	621606	615572	475992	910477	743728	1.11792e+06	678420	496141	431436	435254	512623	511808	808557	876061	1.15185e+06	1.05038e+06	776478
Q9JKV2	1	19.17	Ick	0.957677	0.293879	0.903349	0.271008	0.9999	0.936114	Q9JKV2|ICK_MOUSE Serine/threonine-protein kinase ICK OS=Mus musculus GN=Ick PE=1 SV=2	5.81611e+06	5.46434e+06	5.23381e+06	4.99409e+06	5.3382e+06	4.64523e+06	5.49953e+06	5.14606e+06	5.02822e+06	5.39129e+06	5.49741e+06	5.70333e+06	5.347e+06	6.02914e+06	4.27236e+06	4.22939e+06	5.2848e+06	4.76288e+06	4.13236e+06	5.8448e+06
Q9JHR7	2	78.31	Ide	3.38463	0.001614	0.331622	0.0122784	0.386283	0.0161661	Q9JHR7|IDE_MOUSE Insulin-degrading enzyme OS=Mus musculus GN=Ide PE=1 SV=1	1.37383e+06	1.26766e+06	1.07616e+06	1.26826e+06	1.2862e+06	6.43639e+06	4.72343e+06	2.64904e+06	3.59348e+06	3.82642e+06	1.04655e+06	2.845e+06	3.29039e+06	3.8989e+06	5.15623e+06	1.08602e+06	959168	1.05908e+06	1.11258e+06	1.16773e+06
O88844	14	772.11	Idh1	1.0037	0.953556	0.872322	0.000265046	0.954476	0.169989	O88844|IDHC_MOUSE Isocitrate dehydrogenase [NADP] cytoplasmic OS=Mus musculus GN=Idh1 PE=1 SV=2	1.83239e+07	1.70497e+07	1.91465e+07	1.78792e+07	1.63831e+07	2.06222e+07	1.73122e+07	1.46156e+07	1.78133e+07	1.87476e+07	1.81103e+07	1.86796e+07	1.83534e+07	1.81373e+07	1.97363e+07	1.60517e+07	1.64464e+07	1.54751e+07	1.62353e+07	1.69324e+07
P54071;Q3TZ89	50	3260.01	Idh2	0.944772	0.180979	0.836759	0.0117954	0.927152	0.164809	P54071|IDHP_MOUSE Isocitrate dehydrogenase [NADP], mitochondrial OS=Mus musculus GN=Idh2 PE=1 SV=3	1.80911e+09	1.69806e+09	1.70429e+09	1.80292e+09	1.84263e+09	1.55959e+09	1.88307e+09	1.55701e+09	1.7073e+09	1.66089e+09	1.96404e+09	1.90654e+09	1.96933e+09	2.10012e+09	1.6129e+09	1.51592e+09	1.52715e+09	1.5194e+09	1.65078e+09	1.78025e+09
Q9D6R2	30	1850.58	Idh3a	1.00552	0.892343	0.764031	1.03514e-05	0.873322	0.00123556	Q9D6R2|IDH3A_MOUSE Isocitrate dehydrogenase [NAD] subunit alpha, mitochondrial OS=Mus musculus GN=Idh3a PE=1 SV=1	4.18913e+08	3.77046e+08	4.12237e+08	4.13574e+08	4.20736e+08	4.6305e+08	4.13476e+08	4.03357e+08	3.86578e+08	3.87328e+08	4.99623e+08	4.73359e+08	4.5547e+08	4.47189e+08	4.63138e+08	3.72638e+08	3.3649e+08	3.46544e+08	3.67265e+08	3.63962e+08
P70404	20	1454.22	Idh3g	1.02267	0.681459	0.812876	0.0173035	0.893748	0.153973	P70404|IDHG1_MOUSE Isocitrate dehydrogenase [NAD] subunit gamma 1, mitochondrial OS=Mus musculus GN=Idh3g PE=1 SV=1	1.73693e+08	1.54115e+08	1.63911e+08	1.65946e+08	1.95708e+08	1.56266e+08	1.87205e+08	1.67633e+08	1.75691e+08	1.85921e+08	2.23689e+08	2.01623e+08	1.9549e+08	1.67277e+08	1.66745e+08	1.65359e+08	1.37561e+08	1.51766e+08	1.58049e+08	1.63419e+08
Q64345	1	21.53	Ifit3	0.698853	0.00552156	1.30411	0.123375	1.41893	0.0119624	Q64345|IFIT3_MOUSE Interferon-induced protein with tetratricopeptide repeats 3 OS=Mus musculus GN=Ifit3 PE=1 SV=1	213799	234158	224484	278519	242284	181220	112217	203490	181046	155929	209047	165396	127298	133325	205882	306624	171270	233733	199102	185959
Q62559	1	14.61	Ift52	0.871164	0.11935	1.26918	0.00128356	1.15663	0.0640516	Q62559|IFT52_MOUSE Intraflagellar transport protein 52 homolog OS=Mus musculus GN=Ift52 PE=1 SV=2	966855	1.11645e+06	1.24405e+06	960079	891600	1.03932e+06	813758	912858	811581	934269	922996	811618	901300	930784	911001	1.10247e+06	1.26808e+06	1.17472e+06	994156	1.14357e+06
Q9QZ29	1	65.61	Igbp1b	1.05189	0.765315	1.11724	0.287999	0.996926	0.895152	Q9QZ29|IGB1B_MOUSE Immunoglobulin-binding protein 1b OS=Mus musculus GN=Igbp1b PE=1 SV=1	50005.8	41853.2	59589.6	37804.2	28173.2	61212.4	32582.2	52288.9	42192.6	40432	57529.4	40319.5	45124.5	35500.9	39622.2	54735.6	54385.7	44264.1	45994.2	44285.7
Q61581	1	42.33	Igfbp7	1.77209	0.00780207	4.17769	0.00113859	1.5696	0.090948	Q61581|IBP7_MOUSE Insulin-like growth factor-binding protein 7 OS=Mus musculus GN=Igfbp7 PE=1 SV=3	26526.7	18963.4	40867.6	37444	30066	58657.8	35631	49393.9	66192.1	62792.3	28050	21932.7	15198.1	8130.09	24719.1	120033	97745.2	76506.7	60599.1	54655
P01867	6	283.53	Igh-3	1.42723	0.0495002	2.80101	0.0226794	1.25791	0.213191	P01867|IGG2B_MOUSE Ig gamma-2B chain C region OS=Mus musculus GN=Igh-3 PE=1 SV=3	7.60863e+06	1.09243e+07	7.58446e+06	6.21282e+06	6.31894e+06	1.07675e+07	9.60865e+06	7.74114e+06	1.28392e+07	1.42047e+07	9.85178e+06	4.81252e+06	3.95017e+06	4.63884e+06	7.4716e+06	1.38359e+07	1.98976e+07	2.99356e+07	7.19852e+06	1.51932e+07
P01868	9	376.36	Ighg1	0.836071	0.765119	3.74759	0.170463	1.90944	0.31504	P01868|IGHG1_MOUSE Ig gamma-1 chain C region secreted form OS=Mus musculus GN=Ighg1 PE=1 SV=1	4.09209e+06	3.6585e+07	8.25784e+06	8.81064e+06	7.50179e+06	1.5288e+07	5.58189e+06	4.18132e+06	6.70192e+06	2.27983e+07	4.36089e+06	6.91267e+06	5.28539e+06	3.6746e+06	1.39374e+07	8.30721e+06	3.48975e+07	7.00567e+07	1.01779e+07	4.61943e+06
P03987	8	361.39	IGHG3_MOUSE	0.430337	0.0985399	1.93689	0.0379245	1.87856	0.150948	P03987|IGHG3_MOUSE Ig gamma-3 chain C region OS=Mus musculus PE=1 SV=2	1.34417e+07	5.12545e+06	5.70855e+06	4.35844e+06	1.88647e+07	4.46987e+06	4.68357e+06	2.28663e+06	4.94049e+06	4.05996e+06	3.50724e+06	2.63085e+06	1.19882e+07	2.85606e+06	4.30232e+06	8.27339e+06	1.19074e+07	1.11163e+07	8.24246e+06	9.43425e+06
P01872	12	762.89	Ighm	1.92389	0.00201095	0.74528	0.0765132	0.631876	0.0323652	P01872|IGHM_MOUSE Ig mu chain C region OS=Mus musculus GN=Ighm PE=1 SV=2	2.40681e+07	1.37501e+07	2.98119e+07	2.77405e+07	2.27125e+07	5.7814e+07	3.69742e+07	3.9402e+07	5.16748e+07	4.13138e+07	3.72732e+07	4.36654e+07	2.46582e+07	3.27177e+07	4.85625e+07	3.35829e+07	2.94403e+07	2.17887e+07	2.42665e+07	3.01971e+07
P18531	1	71.51	Ighv3-6	0.205402	0.364159	15.4255	0.112339	28.7639	0.184306	P18531|HVM60_MOUSE Ig heavy chain V region 3-6 OS=Mus musculus GN=Ighv3-6 PE=1 SV=1	1.21897e+06	189245	4315.44	6179.2	17969.2	10364.6	137267	6011.36	18737.5	122716	23046.1	6068.81	0	13253.2	7579.23	51025.5	114769	465881	12272.2	126513
P01837	6	410.78	IGKC_MOUSE	0.974839	0.874163	1.8491	0.0497773	1.28268	0.142323	P01837|IGKC_MOUSE Ig kappa chain C region OS=Mus musculus PE=1 SV=1	1.49457e+07	2.55988e+07	1.42774e+07	1.71556e+07	1.72607e+07	2.32659e+07	1.40195e+07	1.39702e+07	1.55539e+07	2.01833e+07	1.59667e+07	1.24365e+07	1.39436e+07	9.18528e+06	1.80394e+07	2.1066e+07	3.20154e+07	4.16491e+07	1.47994e+07	1.91149e+07
P01633	1	36.67	Igk-V19-17	1.29784	0.0570046	1.71825	0.00274302	0.816252	0.218931	P01633|KV5A1_MOUSE Ig kappa chain V19-17 OS=Mus musculus GN=Igk-V19-17 PE=1 SV=1	507576	726895	319205	626271	557199	663891	707965	658208	708962	813353	653145	934422	606045	574179	585521	1.00936e+06	1.28303e+06	1.26984e+06	1.33184e+06	867773
Q7TSN7	1	15.89	Igsf5	0.840887	0.715173	1.19792	0.580532	0.809778	0.341782	Q7TSN7|IGSF5_MOUSE Immunoglobulin superfamily member 5 OS=Mus musculus GN=Igsf5 PE=1 SV=1	64890.8	200779	164547	155964	282218	49676	60123.1	397011	106054	117360	309988	172067	225982	220929	143424	437505	238304	136682	384802	87341.8
Q61730	2	67.46	Il1rap	1.07997	0.659547	1.5714	0.0036705	1.04917	0.802842	Q61730|IL1AP_MOUSE Interleukin-1 receptor accessory protein OS=Mus musculus GN=Il1rap PE=1 SV=1	279392	390931	340992	436050	547809	527191	393154	467740	523867	242773	419178	361444	272555	392422	456067	660236	600874	707517	567805	451846
O55222	7	368.74	Ilk	0.878653	0.164436	1.35372	0.00100887	1.32217	0.00116525	O55222|ILK_MOUSE Integrin-linked protein kinase OS=Mus musculus GN=Ilk PE=1 SV=2	2.71899e+06	2.80222e+06	2.40146e+06	2.94292e+06	2.88907e+06	1.70064e+06	2.67348e+06	2.32799e+06	2.56534e+06	2.81813e+06	2.21835e+06	2.12121e+06	2.02531e+06	2.27008e+06	1.76818e+06	2.53593e+06	2.83605e+06	2.76815e+06	2.70602e+06	3.23673e+06
Q8CAQ8	45	3015.46	Immt	0.998062	0.955427	0.829372	0.0013161	0.931935	0.070245	Q8CAQ8|MIC60_MOUSE MICOS complex subunit Mic60 OS=Mus musculus GN=Immt PE=1 SV=1	3.07326e+08	2.97716e+08	2.7608e+08	2.91509e+08	2.85952e+08	3.00899e+08	3.19203e+08	2.79517e+08	2.76446e+08	2.79691e+08	3.22851e+08	3.16692e+08	3.08275e+08	3.34167e+08	2.83127e+08	2.46572e+08	2.59092e+08	2.42798e+08	2.6911e+08	2.80489e+08
O55023	9	303.08	Impa1	0.951716	0.316976	1.02447	0.626157	0.992661	0.924901	O55023|IMPA1_MOUSE Inositol monophosphatase 1 OS=Mus musculus GN=Impa1 PE=1 SV=1	3.0948e+06	3.04442e+06	3.19817e+06	2.93782e+06	2.73655e+06	2.66695e+06	2.74172e+06	2.65198e+06	3.21996e+06	3.00632e+06	2.61311e+06	3.10221e+06	2.92311e+06	3.41711e+06	3.0672e+06	2.98294e+06	3.22334e+06	2.98574e+06	3.01179e+06	3.28897e+06
P40936	3	74.55	Inmt	0.227331	5.48672e-05	0.309446	0.000558525	0.889633	0.314561	P40936|INMT_MOUSE Indolethylamine N-methyltransferase OS=Mus musculus GN=Inmt PE=1 SV=1	926102	903843	654800	873419	664373	35847.1	367605	192394	171355	147246	844899	1.11203e+06	843872	714719	1.00605e+06	88758.8	470624	124318	199870	515613
P49442	2	101.52	Inpp1	0.800538	0.089636	1.18517	0.249001	1.13425	0.306152	P49442|INPP_MOUSE Inositol polyphosphate 1-phosphatase OS=Mus musculus GN=Inpp1 PE=1 SV=2	220037	227937	188344	243662	178389	135412	130948	158604	223777	198525	130824	214926	144755	254623	187971	209229	183657	213698	218564	280739
Q9WTL4	1	22.23	Insrr	0.694991	0.297381	2.30931	0.278771	1.10092	0.483582	Q9WTL4|INSRR_MOUSE Insulin receptor-related protein OS=Mus musculus GN=Insrr PE=1 SV=2	258363	331492	287873	227827	199814	52715.3	220359	428443	109530	96172.9	248295	353838	174793	172442	236334	285841	456270	315271	1.5834e+06	97375
Q9CUL5	1	45.13	Iqca1	1.06064	0.429491	0.806566	0.00467273	0.982966	0.789451	Q9CUL5|IQCA1_MOUSE IQ and AAA domain-containing protein 1 OS=Mus musculus GN=Iqca1 PE=2 SV=2	2.46217e+06	2.32546e+06	2.23215e+06	1.86872e+06	2.27712e+06	2.20391e+06	2.53074e+06	1.9423e+06	2.52387e+06	2.64183e+06	2.47865e+06	2.19459e+06	2.41349e+06	2.33395e+06	1.93843e+06	1.85275e+06	1.89863e+06	1.6196e+06	1.80984e+06	1.98105e+06
Q9JKF1	5	191.94	Iqgap1	1.83939	0.00244645	1.60081	0.0112793	0.746939	0.00691663	Q9JKF1|IQGA1_MOUSE Ras GTPase-activating-like protein IQGAP1 OS=Mus musculus GN=Iqgap1 PE=1 SV=2	305352	272313	339705	395153	308649	495581	474537	533638	734029	744191	377474	469251	475932	381616	466148	918733	774130	649367	678477	453715
P56477	1	25.71	Irf5	1.02647	0.769527	0.766418	0.188965	0.629148	0.0212971	P56477|IRF5_MOUSE Interferon regulatory factor 5 OS=Mus musculus GN=Irf5 PE=1 SV=1	237934	234932	212254	169193	174967	226673	216544	179622	238269	195414	238583	354402	502396	283194	257419	211597	296159	180565	282462	283073
Q9D924	1	37.37	Isca1	1.2282	0.138332	1.27899	0.0494419	0.967568	0.821834	Q9D924|ISCA1_MOUSE Iron-sulfur cluster assembly 1 homolog, mitochondrial OS=Mus musculus GN=Isca1 PE=2 SV=1	179111	171591	227063	186570	209144	195787	243731	171560	305590	278961	202679	270751	163627	184949	184102	252307	249454	257152	214970	312922
Q9DCB8	3	197.62	Isca2	0.88522	0.406636	0.767347	0.0567664	1.06259	0.627798	Q9DCB8|ISCA2_MOUSE Iron-sulfur cluster assembly 2 homolog, mitochondrial OS=Mus musculus GN=Isca2 PE=1 SV=2	522966	680402	541157	575539	400359	627289	514273	537719	428093	300799	426563	628871	471538	607482	425740	361726	426641	334225	495362	346603
Q9D7P6	4	179.5	Iscu	0.70336	0.134474	1.14346	0.308599	1.32574	0.203654	Q9D7P6|ISCU_MOUSE Iron-sulfur cluster assembly enzyme ISCU, mitochondrial OS=Mus musculus GN=Iscu PE=1 SV=1	862795	1.53183e+06	1.09558e+06	2.02746e+06	1.01915e+06	1.14254e+06	765624	1.17017e+06	799886	719517	1.19123e+06	1.18782e+06	807288	741558	1.0028e+06	942903	1.14151e+06	953996	1.4413e+06	1.15835e+06
Q91V64	7	374.82	Isoc1	1.05732	0.333909	1.04473	0.417795	0.914584	0.0379396	Q91V64|ISOC1_MOUSE Isochorismatase domain-containing protein 1 OS=Mus musculus GN=Isoc1 PE=1 SV=1	2.05631e+06	2.05806e+06	2.3777e+06	1.96105e+06	2.06045e+06	2.30544e+06	2.25842e+06	1.86408e+06	2.28512e+06	2.40319e+06	2.17883e+06	2.28037e+06	2.3793e+06	2.38221e+06	2.27475e+06	2.51522e+06	2.26635e+06	2.72282e+06	2.04983e+06	2.45538e+06
P85094	5	605.73	Isoc2a	0.933235	0.33389	0.706824	0.00593765	1.00085	0.933978	P85094|ISC2A_MOUSE Isochorismatase domain-containing protein 2A OS=Mus musculus GN=Isoc2a PE=1 SV=1	9.09074e+06	8.37307e+06	8.78766e+06	8.76791e+06	7.52815e+06	9.60031e+06	8.46912e+06	7.12739e+06	7.31013e+06	7.1999e+06	8.62542e+06	7.45049e+06	8.57793e+06	7.55237e+06	1.03052e+07	6.74709e+06	4.60918e+06	5.85389e+06	5.75812e+06	7.07978e+06
Q9QUM0	1	13.63	Itga2b	0.742709	0.454642	2.27929	0.0166079	1.35545	0.324462	Q9QUM0|ITA2B_MOUSE Integrin alpha-IIb OS=Mus musculus GN=Itga2b PE=1 SV=2	164378	91563.2	212088	102322	266287	0	67170.5	133623	258643	161943	176666	158260	108864	93341.7	80110.4	298440	177648	212824	259168	458793
Q61739	1	68.5	Itga6	1.38674	0.477334	1.89566	0.199006	0.816997	0.410953	Q61739|ITA6_MOUSE Integrin alpha-6 OS=Mus musculus GN=Itga6 PE=1 SV=3	15584.7	18080.8	13862.5	37754.7	21508.7	0	21699	21532	47932.8	56928.4	11335.8	48965.9	14620.8	0	55789.8	11101.2	31051.4	73168.8	55693.1	76771.9
Q61738	5	156.43	Itga7	1.11008	0.195018	0.952155	0.366639	0.9279	0.234811	Q61738|ITA7_MOUSE Integrin alpha-7 OS=Mus musculus GN=Itga7 PE=1 SV=3	1.36777e+06	1.33271e+06	1.12074e+06	1.46517e+06	1.3888e+06	1.67334e+06	1.65089e+06	1.21342e+06	1.37418e+06	1.49816e+06	1.37056e+06	1.39475e+06	1.3128e+06	1.48358e+06	1.63218e+06	1.234e+06	1.50988e+06	1.41504e+06	1.35824e+06	1.33252e+06
P09055	10	421.64	Itgb1	1.15705	0.313073	1.59975	0.0109765	1.13581	0.347086	P09055|ITB1_MOUSE Integrin beta-1 OS=Mus musculus GN=Itgb1 PE=1 SV=1	2.61527e+06	3.1513e+06	2.09646e+06	2.05994e+06	1.94614e+06	3.14166e+06	2.91381e+06	2.40509e+06	1.91093e+06	3.36167e+06	1.56201e+06	2.0565e+06	2.21149e+06	1.9454e+06	2.67449e+06	2.35512e+06	4.22707e+06	3.90407e+06	3.29608e+06	2.93489e+06
Q9R000	1	27.95	Itgb1bp2	0.76649	0.03361	0.845508	0.18309	1.15612	0.244266	Q9R000|ITBP2_MOUSE Integrin beta-1-binding protein 2 OS=Mus musculus GN=Itgb1bp2 PE=1 SV=1	23161.2	26126.3	22563.3	35467.5	24624.1	21790.7	19090.1	19191.3	20812	20248.4	22666	25584.4	24890.4	24357.8	16626.1	16385.9	18239	16841.6	18766.7	26260.2
Q61702	9	306.36	Itih1	1.38351	0.000203367	1.98061	0.000407835	1.24334	0.0233881	Q61702|ITIH1_MOUSE Inter-alpha-trypsin inhibitor heavy chain H1 OS=Mus musculus GN=Itih1 PE=1 SV=2	2.57951e+06	2.95741e+06	2.53333e+06	2.4932e+06	2.65797e+06	3.91863e+06	3.4078e+06	3.40428e+06	4.04092e+06	3.52031e+06	2.1861e+06	1.96637e+06	2.11035e+06	1.68725e+06	2.6837e+06	4.14533e+06	5.01623e+06	4.87042e+06	3.53591e+06	3.49348e+06
Q61703	8	317.03	Itih2	1.75816	0.00437456	1.96882	0.00485613	1.01245	0.828875	Q61703|ITIH2_MOUSE Inter-alpha-trypsin inhibitor heavy chain H2 OS=Mus musculus GN=Itih2 PE=1 SV=1	1.69172e+06	2.78333e+06	2.29043e+06	2.25201e+06	2.02346e+06	5.05366e+06	3.25321e+06	2.86591e+06	3.91815e+06	4.32089e+06	1.66363e+06	1.76088e+06	2.18382e+06	1.92952e+06	3.36733e+06	3.55359e+06	4.83779e+06	5.82917e+06	3.57993e+06	3.66991e+06
A6X935	17	807.92	Itih4	0.608639	0.142166	1.49572	0.0241578	2.16872	0.0486093	A6X935|ITIH4_MOUSE Inter alpha-trypsin inhibitor, heavy chain 4 OS=Mus musculus GN=Itih4 PE=1 SV=2	1.14935e+07	6.47314e+06	1.11814e+07	4.52227e+06	2.90413e+06	5.50981e+06	4.08539e+06	4.06184e+06	4.21088e+06	4.39269e+06	2.83168e+06	4.03253e+06	3.0432e+06	2.41989e+06	4.53724e+06	4.26466e+06	5.8792e+06	6.33788e+06	4.74777e+06	3.99513e+06
Q9D892	4	201.19	Itpa	1.43622	0.00337407	0.864988	0.303972	0.762973	0.113732	Q9D892|ITPA_MOUSE Inosine triphosphate pyrophosphatase OS=Mus musculus GN=Itpa PE=1 SV=2	1.835e+06	1.59504e+06	1.52533e+06	1.63699e+06	1.14431e+06	1.76833e+06	2.36991e+06	2.19981e+06	2.38272e+06	2.39076e+06	1.45184e+06	1.7334e+06	2.67981e+06	2.53881e+06	1.73627e+06	1.65982e+06	1.61214e+06	1.81573e+06	1.8912e+06	1.79221e+06
Q9Z329	1	44.23	Itpr2	1.1708	0.541902	1.36551	0.0285167	0.845781	0.385745	Q9Z329|ITPR2_MOUSE Inositol 1,4,5-trisphosphate receptor type 2 OS=Mus musculus GN=Itpr2 PE=1 SV=4	1.03933e+06	902969	19636.2	986172	791678	808684	739549	745540	969003	1.11576e+06	897640	898903	993646	998731	632772	1.16099e+06	1.5635e+06	1.27459e+06	1.04175e+06	997017
Q9Z0R4	1	47.64	Itsn1	1.25881	0.222871	0.447457	0.00864517	0.463508	0.00137082	Q9Z0R4|ITSN1_MOUSE Intersectin-1 OS=Mus musculus GN=Itsn1 PE=1 SV=2	321520	288120	274712	246400	220200	406852	446120	395124	277770	174724	419876	508851	578471	935843	471583	214589	261015	308297	244389	275878
Q9JHI5	35	1843.4	Ivd	0.874607	0.0187422	0.805041	0.000578291	0.93271	0.155682	Q9JHI5|IVD_MOUSE Isovaleryl-CoA dehydrogenase, mitochondrial OS=Mus musculus GN=Ivd PE=1 SV=1	2.47394e+08	2.41624e+08	2.51921e+08	2.28884e+08	2.15758e+08	2.23697e+08	2.28191e+08	1.98487e+08	1.92407e+08	1.94136e+08	2.61409e+08	2.46522e+08	2.74889e+08	2.62417e+08	2.25877e+08	1.94239e+08	1.9993e+08	2.1145e+08	2.06921e+08	2.1076e+08
Q920Q8	1	27.52	Ivns1abp	1.10978	0.70047	1.11884	0.529607	1.05359	0.934885	Q920Q8|NS1BP_MOUSE Influenza virus NS1A-binding protein homolog OS=Mus musculus GN=Ivns1abp PE=1 SV=2	44571.5	133399	68829.4	114259	41858.9	60361.4	114277	87452.3	119895	65165.2	99290.4	89140.8	82857.7	65188.2	45947.2	99075.4	63906.2	60814.5	91086.9	112989
Q9ET78;Q9ET80	13	721.4	Jph2	0.973467	0.85556	1.37991	0.00294003	1.18152	0.118637	Q9ET78|JPH2_MOUSE Junctophilin-2 OS=Mus musculus GN=Jph2 PE=1 SV=2	7.60961e+06	9.95948e+06	8.1166e+06	7.49631e+06	6.77234e+06	1.16824e+07	6.53664e+06	6.2995e+06	7.23727e+06	7.13845e+06	5.96203e+06	6.58163e+06	6.32267e+06	6.07276e+06	8.87697e+06	8.85479e+06	9.46939e+06	9.95256e+06	9.88288e+06	8.50333e+06
Q02257	20	1270.12	Jup	1.14662	0.583316	0.980079	0.938546	1.12812	0.851819	Q02257|PLAK_MOUSE Junction plakoglobin OS=Mus musculus GN=Jup PE=1 SV=3	8.93617e+06	1.98649e+07	5.59353e+06	7.94466e+06	8.81597e+06	1.39721e+07	1.35852e+07	9.9277e+06	1.02757e+07	1.08947e+07	7.1475e+06	9.80822e+06	7.39176e+06	1.21274e+07	8.87048e+06	6.3426e+06	4.82674e+06	7.66377e+06	1.67763e+07	8.83259e+06
Q8BX02	1	34.97	Kank2	1.17767	0.537036	1.04599	0.569537	0.804383	0.307718	Q8BX02|KANK2_MOUSE KN motif and ankyrin repeat domain-containing protein 2 OS=Mus musculus GN=Kank2 PE=1 SV=1	10947.4	21436.3	2559.82	22665.8	17750.1	23012.8	19856.1	14671.6	18350	12857.8	22402.7	17713.1	16418.3	17702.3	19449.4	17368.1	23137.5	20418.3	18962.8	18108.3
Q99MN1	9	295.29	Kars	1.12733	0.037589	0.952296	0.345104	0.958149	0.456304	Q99MN1|SYK_MOUSE Lysine--tRNA ligase OS=Mus musculus GN=Kars PE=1 SV=1	3.60845e+06	3.22817e+06	3.40192e+06	3.23186e+06	3.42474e+06	3.57182e+06	4.03972e+06	3.34259e+06	3.87503e+06	4.21717e+06	3.21095e+06	3.16541e+06	3.97701e+06	3.82862e+06	3.45111e+06	3.43813e+06	3.22258e+06	3.34429e+06	3.34332e+06	3.44361e+06
Q50H33;Q6WVG3	1	46.21	Kctd8	0.993634	0.980967	1.73304	0.0669932	1.20399	0.823876	Q50H33|KCTD8_MOUSE BTB/POZ domain-containing protein KCTD8 OS=Mus musculus GN=Kctd8 PE=1 SV=1	56393.5	11651.5	59361.1	34938.9	42659.2	16487	50868.9	42086.9	46743.6	47512.7	29885.8	23292.6	34271.4	46136.2	36684.3	70354.5	65115	91444.6	30164.9	38007
Q3U2K5	1	25.22	Kdm4d	0.920734	0.642176	1.11065	0.731434	1.12553	0.418707	Q3U2K5|KDM4D_MOUSE Lysine-specific demethylase 4D OS=Mus musculus GN=Kdm4d PE=2 SV=2	4.61303e+06	3.09842e+06	3.63854e+06	3.55427e+06	4.48664e+06	3.83123e+06	3.14024e+06	1.65346e+06	4.21457e+06	5.01436e+06	5.26279e+06	4.4103e+06	1.46111e+06	1.56743e+06	4.52658e+06	3.71014e+06	1.85349e+06	3.17036e+06	4.19296e+06	6.20754e+06
Q5NCY0	1	16.83	Kdm6b	1.58986	0.0918222	1.11908	0.382223	0.818787	0.200744	Q5NCY0|KDM6B_MOUSE Lysine-specific demethylase 6B OS=Mus musculus GN=Kdm6b PE=1 SV=1	2.67135e+07	1.76806e+07	2.31416e+07	1.83039e+07	2.38942e+07	5.84055e+07	3.29224e+07	1.7983e+07	3.18105e+07	3.33406e+07	3.20314e+07	3.26048e+07	2.01495e+07	2.00384e+07	2.91959e+07	2.81164e+07	2.56243e+07	2.69457e+07	3.28586e+07	3.64341e+07
Q60749	1	35.23	Khdrbs1	1.16108	0.190938	1.19255	0.166337	1.21517	0.172972	Q60749|KHDR1_MOUSE KH domain-containing, RNA-binding, signal transduction-associated protein 1 OS=Mus musculus GN=Khdrbs1 PE=1 SV=2	90089.4	114509	82444	130082	125929	149117	123025	137764	111136	109485	83764	93759.4	66759.1	83200.9	119411	106124	102431	117003	125018	82366.8
Q3U0V1	3	90.83	Khsrp	0.83398	0.371592	0.990286	0.926255	0.868702	0.304613	Q3U0V1|FUBP2_MOUSE Far upstream element-binding protein 2 OS=Mus musculus GN=Khsrp PE=1 SV=2	193940	250209	243686	366612	368967	101560	253714	306830	253869	271124	347463	404558	254755	323464	308311	353300	268625	309689	396257	294763
Q61768;P28738	8	445.72	Kif5b	1.39425	0.00281349	1.07933	0.401738	1.06009	0.37152	Q61768|KINH_MOUSE Kinesin-1 heavy chain OS=Mus musculus GN=Kif5b PE=1 SV=3	586424	682825	627274	601343	677764	882783	842872	724427	1.06871e+06	908820	532454	565236	532377	725384	640164	734579	537541	604971	620660	735491
Q9D783	1	24.96	Klhl40	0.974287	0.952278	1.11686	0.648052	0.728052	0.225166	Q9D783|KLH40_MOUSE Kelch-like protein 40 OS=Mus musculus GN=Klhl40 PE=1 SV=1	116921	184663	101625	118913	526351	161530	117117	298578	176767	267522	359427	227504	276278	145785	431113	334987	482393	302945	323860	164205
A2AUC9;Q64176	11	510	Klhl41	1.19953	0.0328738	0.877412	0.0650039	0.890793	0.104848	A2AUC9|KLH41_MOUSE Kelch-like protein 41 OS=Mus musculus GN=Klhl41 PE=1 SV=1	3.88567e+06	4.09001e+06	3.99413e+06	3.54083e+06	4.34059e+06	5.58939e+06	4.83972e+06	3.83598e+06	4.79628e+06	4.75085e+06	3.63145e+06	4.54978e+06	4.54916e+06	4.90285e+06	4.65167e+06	4.18109e+06	3.49532e+06	3.7128e+06	3.96429e+06	4.19956e+06
P26262	3	140.94	Klkb1	1.54316	0.014854	2.04766	0.000710139	1.2152	0.150099	P26262|KLKB1_MOUSE Plasma kallikrein OS=Mus musculus GN=Klkb1 PE=1 SV=2	232851	252085	223655	197383	234445	321071	288417	338517	504711	307137	150930	174178	121451	239320	252584	311130	386531	436923	449285	337785
O08677	17	1030.92	Kng1	1.30774	0.00431602	1.35011	0.00729853	1.02533	0.665374	O08677|KNG1_MOUSE Kininogen-1 OS=Mus musculus GN=Kng1 PE=1 SV=1	4.41133e+07	5.05064e+07	4.9049e+07	4.5145e+07	4.72823e+07	6.89733e+07		5.39516e+07	6.70297e+07	5.70479e+07	4.23831e+07	4.43468e+07	3.8792e+07	4.39686e+07	6.07729e+07	5.82455e+07	6.07139e+07	7.12918e+07	6.25858e+07	5.80434e+07
O35344	1	48.94	Kpna3	1.25992	0.194188	1.21333	0.208262	0.948543	0.790929	O35344|IMA4_MOUSE Importin subunit alpha-4 OS=Mus musculus GN=Kpna3 PE=1 SV=1	67647.9	89770.8	53341.6	65016	65150.4	103613	63685.9	58633.6	88282.5	115326	69040.4	55749.6	69573.1	106753	58305.5	108678	71849.4	92156.3	76483.1	86931.1
O35343	2	213.12	Kpna4	1.44431	0.0113767	0.854087	0.432528	0.72054	0.165555	O35343|IMA3_MOUSE Importin subunit alpha-3 OS=Mus musculus GN=Kpna4 PE=1 SV=1	390047	365429	172205	299738	320277	497510	449944	398216	415025	474657	358114	277567	547779	619997	344508	361714	260698	460515	443467	308156
O35345	1	19.04	Kpna6	0.866662	0.583387	0.736952	0.136007	0.957755	0.949441	O35345|IMA7_MOUSE Importin subunit alpha-7 OS=Mus musculus GN=Kpna6 PE=1 SV=2	112874	105669	72345.8	92684.1	83408.7	0	101977	88418.4	107276	107043	57197.2	81161.4	93991	138167	117063	59642.5	54473.7	90134.8	77660.3	77411.7
P70168	4	94.77	Kpnb1	1.72864	0.157042	1.74667	0.0548173	1.14672	0.672426	P70168|IMB1_MOUSE Importin subunit beta-1 OS=Mus musculus GN=Kpnb1 PE=1 SV=2	597347	429623	407726	167698	230825	882696	627085	375122	230028	1.05405e+06	145729	196716	499326	300793	456095	271945	525647	681457	732663	580623
P04104	3	447.04	Krt1	0.660376	0.364345	1.92336	0.329357	2.11127	0.0898456	P04104|K2C1_MOUSE Keratin, type II cytoskeletal 1 OS=Mus musculus GN=Krt1 PE=1 SV=4	4.89816e+07	1.28187e+08	3.7656e+07	3.5843e+07	2.50183e+07	3.76652e+07	4.21587e+07	5.26389e+07	3.00609e+07	1.95326e+07	1.47941e+07	4.5023e+07	1.90809e+07	2.28906e+07	2.87898e+07	1.64015e+07	3.66662e+07	3.69524e+07	1.39231e+08	2.18977e+07
P02535	9	681.63	Krt10	0.41049	0.332341	2.28066	0.302326	2.75467	0.22901	P02535|K1C10_MOUSE Keratin, type I cytoskeletal 10 OS=Mus musculus GN=Krt10 PE=1 SV=3	9.37846e+07	4.94408e+08	7.04617e+07	6.13801e+07	4.0309e+07	4.94919e+07	5.03011e+07	1.08723e+08	6.44165e+07	3.91813e+07	3.26698e+07	8.15203e+07	4.4631e+07	5.86735e+07	5.85248e+07	5.77082e+07	6.64079e+07	7.69144e+07	3.79641e+08	4.8835e+07
Q64291	1	55.12	Krt12	0.031706	0.125909	2.87642	0.503293	9.11985	0.30665	Q64291|K1C12_MOUSE Keratin, type I cytoskeletal 12 OS=Mus musculus GN=Krt12 PE=1 SV=2	170397	21644.4	1.77155e+06	1.24648e+06	4874.56	5679.54	15014.3	50418.2	22607.3	8214.07	210792	11511.6	15664.3	107268	7286.19	6774.64	17246.6	940904	25896.4	23179.6
P08730	1	235.57	Krt13	0.293635	0.144684	2.84655	0.19414	6.26685	0.0328262	P08730|K1C13_MOUSE Keratin, type I cytoskeletal 13 OS=Mus musculus GN=Krt13 PE=1 SV=2	67160.7	56527.3	399797	368356	37798	52340.7	55673.4	53255.5	45405.8	66299.2	22136.4	34264.3	31063.5	53734.7	7143.53	56697.1	40321.9	234089	28483.6	62672.5
Q61781;B1AQ75	1	859.93	Krt14	0.244362	0.452612	1.32311	0.774467	8.47624	0.652835	Q61781|K1C14_MOUSE Keratin, type I cytoskeletal 14 OS=Mus musculus GN=Krt14 PE=1 SV=2	9446.96	273504	250.316	100.51	4468.16	3628.43	0	9926.24	56765.3	0	2747.26	4722.99	0	10838.6	15641.3	2244.39	1875.48	4637.01	36163	0
Q61414	1	280.06	Krt15	3.98045	0.274873	1.53305	0.607958	0.95309	0.748281	Q61414|K1C15_MOUSE Keratin, type I cytoskeletal 15 OS=Mus musculus GN=Krt15 PE=1 SV=2	159088	125852	26619.5	67183	20431	41008.9	27529.1	1.09207e+06	96998.9	331285	26215.6	74690.8	18266.1	25688.3	273959	3818.37	43498.5	124458	388681	81616
Q9Z2K1	3	414.47	Krt16	0.843966	0.802874	1.93308	0.554874	1.10121	0.616599	Q9Z2K1|K1C16_MOUSE Keratin, type I cytoskeletal 16 OS=Mus musculus GN=Krt16 PE=1 SV=3	1.62084e+06	7.07717e+06	1.43319e+06	1.22691e+06	723793	1.1438e+06	3.52628e+06	4.66098e+06	578964	286693	1.04411e+06	7.62953e+06	1.11317e+06	461807	722843	1.12102e+06	1.30331e+06	1.43926e+06	1.63571e+07	988084
Q9QWL7	1	421.31	Krt17	0.240695	0.160512	2.41855	0.2609	2.42892	0.202244	Q9QWL7|K1C17_MOUSE Keratin, type I cytoskeletal 17 OS=Mus musculus GN=Krt17 PE=1 SV=3	129471	96731.3	20935.3	40908.4	360082	0	0	40014.9	100709	15277.7	20322.8	130287	99021.1	8148.21	9058.29	56611	75710.1	171327	331858	9854.06
P05784	1	107.05	Krt18	1.4034	0.456976	1.47277	0.5525	2.44284	0.0584473	P05784|K1C18_MOUSE Keratin, type I cytoskeletal 18 OS=Mus musculus GN=Krt18 PE=1 SV=5	44518.7	59164.7	100760	201740	102188	184344	298682	101270	63199.6	65951.7	9454.7	13711.9	37221.2	42547.8	105171	110819	140146	17587.8	26371.2	11568.8
P19001	2	356.97	Krt19	0.559645	0.0840339	1.28236	0.262711	1.9277	0.0406317	P19001|K1C19_MOUSE Keratin, type I cytoskeletal 19 OS=Mus musculus GN=Krt19 PE=1 SV=1	203621	100484	275594	124555	99610.9	104405	97529.6	113963	57945.1	76035.9	50164.4	77930.4	85434.2	75225.8	128252	120057	128770	63790.1	80414.2	141720
Q3TTY5	7	345.6	Krt2	0.565467	0.344622	1.78223	0.326056	2.17215	0.157696	Q3TTY5|K22E_MOUSE Keratin, type II cytoskeletal 2 epidermal OS=Mus musculus GN=Krt2 PE=1 SV=1	4.42075e+07	1.6414e+08	3.87556e+07	3.56336e+07	2.34406e+07	3.75102e+07	3.53015e+07	5.16178e+07	2.98897e+07	1.88138e+07	1.59163e+07	4.98198e+07	2.2867e+07	2.66097e+07	2.5743e+07	2.38892e+07	3.62364e+07	3.69442e+07	1.30569e+08	2.35772e+07
Q8CCX5	1	50.42	Krt222	0.587265	0.00103748	1.02072	0.91087	1.12465	0.342283	Q8CCX5|KT222_MOUSE Keratin-like protein KRT222 OS=Mus musculus GN=Krt222 PE=2 SV=1	553110	662658	729452	594013	846226	357561	387984	476320	387908	378387	766298	717291	535616	449357	541660	847904	806992	549255	452313	416118
A1L317	1	68.73	Krt24	0.275398	0.378785	5.67994	0.270726	7.90031	0.39319	A1L317|K1C24_MOUSE Keratin, type I cytoskeletal 24 OS=Mus musculus GN=Krt24 PE=2 SV=2	265583	3.09348e+06	273309	169120	3935.42	84207.9	147904	554446	201953	59494.8	27888.6	293238	20602.2	49541.7	90410	43539.4	196139	295937	2.04917e+06	151135
P07744	1	243.23	Krt4	0.303277	0.251734	1.53261	0.509878	5.77533	0.383132	P07744|K2C4_MOUSE Keratin, type II cytoskeletal 4 OS=Mus musculus GN=Krt4 PE=1 SV=2	38082.9	56852.8	850504	559557	13320.3	101012	30524.9	131076	78474.9	119382	26310.4	55792.8	62280.5	50442.5	68070.7	17976.7	32936.3	234724	36063.2	81217.4
Q6IFX2	3	668.76	Krt42	0.796875	0.694682	2.36025	0.450867	1.31593	0.432557	Q6IFX2|K1C42_MOUSE Keratin, type I cytoskeletal 42 OS=Mus musculus GN=Krt42 PE=1 SV=1	1.64899e+06	4.89313e+06	1.48182e+06	971125	732817	876214	2.20647e+06	3.64367e+06	625431	400124	915540	4.48732e+06	915638	363770	710119	1.06136e+06	1.16713e+06	1.47202e+06	1.31575e+07	589845
Q922U2	3	550.6	Krt5	0.622798	0.450562	2.11432	0.346283	2.32421	0.184885	Q922U2|K2C5_MOUSE Keratin, type II cytoskeletal 5 OS=Mus musculus GN=Krt5 PE=1 SV=1	3.21641e+06	1.12658e+07	2.21472e+06	2.45606e+06	1.09729e+06	1.92312e+06	3.51826e+06	4.21931e+06	1.91269e+06	1.03845e+06	839970	3.78042e+06	1.30818e+06	1.43637e+06	1.34782e+06	1.25602e+06	2.15277e+06	2.28419e+06	1.11252e+07	1.60337e+06
P50446;Q9Z331;Q99M73	2	607.78	Krt6a	0.877977	0.347537	1.61107	0.248932	1.05354	0.658549	P50446|K2C6A_MOUSE Keratin, type II cytoskeletal 6A OS=Mus musculus GN=Krt6a PE=1 SV=3	4.5107e+06	6.8232e+06	4.85139e+06	4.25283e+06	4.59885e+06	4.12941e+06	5.77561e+06	4.68502e+06	3.41734e+06	3.97449e+06	4.06532e+06	7.08649e+06	4.24221e+06	4.31762e+06	4.05288e+06	7.43226e+06	5.57797e+06	5.29665e+06	1.6371e+07	3.60848e+06
Q6NXH9	1	359.77	Krt73	0.193202	0.209899	3.79245	0.354178	10.9114	0.51156	Q6NXH9|K2C73_MOUSE Keratin, type II cytoskeletal 73 OS=Mus musculus GN=Krt73 PE=1 SV=1	7858.21	12186.7	552950	484729	3834.33	37958	45102.4	46463.7	43868.5	31703.2	19753.3	12428.8	22823.9	22823.9	19458.8	25791.3	32598	293571	0	17002.8
Q8BGZ7	2	548.01	Krt75	0.70772	0.581873	2.12771	0.283048	2.34587	0.246085	Q8BGZ7|K2C75_MOUSE Keratin, type II cytoskeletal 75 OS=Mus musculus GN=Krt75 PE=1 SV=1	1.41763e+06	6.35136e+06	1.20729e+06	1.17656e+06	513104	1.197e+06	1.98878e+06	2.00234e+06	1.42999e+06	930387	464220	1.82935e+06	608056	792188	852867	868155	1.02324e+06	1.20464e+06	5.35772e+06	1.22027e+06
Q3UV17	1	251.84	Krt76	0.45756	0.330005	2.10583	0.379651	2.81344	0.18342	Q3UV17|K22O_MOUSE Keratin, type II cytoskeletal 2 oral OS=Mus musculus GN=Krt76 PE=1 SV=1	3.51226e+07	1.41619e+08	2.50923e+07	2.17357e+07	9.72042e+06	1.95162e+07	2.41645e+07	3.45855e+07	1.75084e+07	1.09695e+07	8.47826e+06	3.22481e+07	1.10748e+07	1.49094e+07	1.62094e+07	5.01556e+06	2.01959e+07	2.30665e+07	1.11063e+08	1.52747e+07
Q6IFZ6;Q6IFZ9	4	425.31	Krt77	0.535667	0.528023	3.14241	0.252795	2.95533	0.378338	Q6IFZ6|K2C1B_MOUSE Keratin, type II cytoskeletal 1b OS=Mus musculus GN=Krt77 PE=1 SV=1	294535	3.93812e+06	407410	395711	209406	247422	494718	1.10781e+06	605968	353747	189751	651844	190668	192902	549655	989698	397119	434642	3.49825e+06	257491
Q8VED5	1	271.3	Krt79	0.750564	0.499101	1.88097	0.216399	1.86322	0.162164	Q8VED5|K2C79_MOUSE Keratin, type II cytoskeletal 79 OS=Mus musculus GN=Krt79 PE=1 SV=2	8.55201e+06	2.003e+07	6.82143e+06	6.47461e+06	3.3966e+06	8.1845e+06	5.60576e+06	1.14259e+07	5.56471e+06	3.20064e+06	2.99449e+06	8.91791e+06	3.68405e+06	5.07416e+06	3.62856e+06	5.39062e+06	7.76119e+06	7.10189e+06	2.09359e+07	4.51651e+06
P11679	1	220.94	Krt8	0.23148	0.100162	0.660961	0.448631	2.29495	0.352616	P11679|K2C8_MOUSE Keratin, type II cytoskeletal 8 OS=Mus musculus GN=Krt8 PE=1 SV=4	108212	10862.3	133579	355927	109638	9282.12	14241.4	91592.1	4363.41	46774.4	51798.2	24705.8	108789	9349.66	118313	101451	31733.5	21557.5	25654.6	26455
Q0VBK2	2	83.39	Krt80	2.22504	0.0157833	1.37359	0.629022	3.50103	0.0204679	Q0VBK2|K2C80_MOUSE Keratin, type II cytoskeletal 80 OS=Mus musculus GN=Krt80 PE=1 SV=1	3.42403e+06	1.44082e+06	2.36713e+06	528080	1.38393e+06	3.04838e+06	5.13946e+06	3.74264e+06	2.87112e+06	5.54415e+06	225573	185885	85116.6	176372	1.93885e+06	604874	1.11362e+06	635224	1.00687e+06	226952
Q9Z2T6;P97861	3	159.93	Krt85	0.122413	0.376744	76.7898	0.345224	4.33468	0.501804	Q9Z2T6|KRT85_MOUSE Keratin, type II cuticular Hb5 OS=Mus musculus GN=Krt85 PE=1 SV=2	109.253	81.0809	42.3917	36511.7	1796.63	415.564	2963.14	1090.61	223.663	24.9521	242.864	1912.86	1765.69	4139.87	830.052	674020	3538.37	2910.42	108.191	2187.05
Q61595	10	360.24	Ktn1	1.66585	0.0279956	0.804088	0.271389	0.817805	0.297628	Q61595|KTN1_MOUSE Kinectin OS=Mus musculus GN=Ktn1 PE=1 SV=1	1.71879e+06	1.2593e+06	1.44186e+06	1.3455e+06	1.21865e+06	3.38145e+06	1.85135e+06	1.40361e+06	2.53585e+06	2.46221e+06	1.3439e+06	1.83814e+06	1.23335e+06	1.46311e+06	2.66156e+06	1.47047e+06	1.07562e+06	1.1357e+06	1.52224e+06	1.66293e+06
P03976	1	51.23	KV2A5_MOUSE	0.148567	0.401269	9.76259	0.260207	9.98553	0.557091	P03976|KV2A5_MOUSE Ig kappa chain V-II region 17S29.1 OS=Mus musculus PE=1 SV=1	1541.95	187559	149.205	0	4952.96	0	2568.93	1702.44	8299.45	16281.3	0	13186	0	5812.04	450.363	2662.61	19359.5	149114	1933.45	16797
P01635	1	53.94	KV5A3_MOUSE	0.867042	0.629139	2.95746	0.0858586	1.40713	0.355857	P01635|KV5A3_MOUSE Ig kappa chain V-V region K2 (Fragment) OS=Mus musculus PE=1 SV=1	237111	283558	66752.6	172718	88215.4	119307	104300	145527	168946	197479	96175.2	72841.7	77532.1	60767.2	295579	143827	453354	749822	262075	173958
P01637	1	82.75	KV5A5_MOUSE	1.7509	0.275297	1.52287	0.64615	0.524535	0.810202	P01637|KV5A5_MOUSE Ig kappa chain V-V region T1 OS=Mus musculus PE=4 SV=1	194353	404294	60692.2	72758.5	87442.3	501131	129960	476094	143482	184262	207152	143465	1.11543e+06	60993.7	35369.1	145015	381848	1.56338e+06	112884	176221
P01643	1	164.22	KV5AA_MOUSE	1.59831	0.471667	2.02787	0.0936688	1.20994	0.921172	P01643|KV5AA_MOUSE Ig kappa chain V-V region MOPC 173 OS=Mus musculus PE=1 SV=1	57151.5	169705	185106	535035	128423	7492.83	580142	792586	93793	244844	199885	212269	120725	226831	129111	655385	243281	422860	96496.7	384394
P04940	1	66.38	KV6A6_MOUSE	2.60621	0.254712	3.48428	0.270887	0.478889	0.62026	P04940|KV6A6_MOUSE Ig kappa chain V-VI region NQ2-17.4.1 OS=Mus musculus PE=2 SV=1	4199.04	36309.5	0	5543.74	15751.4	10828.5	4264.85	39929	19698.1	86353	3820.76	112780	7549.52	155.744	4750.34	8880.47	99671.6	278593	40407.1	22117.6
P04945	1	48.41	KV6AB_MOUSE	1.09493	0.891149	1.8839	0.238646	0.642146	0.448417	P04945|KV6AB_MOUSE Ig kappa chain V-VI region NQ2-6.1 OS=Mus musculus PE=2 SV=1	110174	59538.7	35882.8	10724.3	392413	20157.7	156594	58628	262637	168500	134821	560972	46874.7	35950.9	169348	347829	698238	305553	254526	179726
Q8C8H8	1	17.78	Ky	1.229	0.055225	0.857017	0.125775	0.886409	0.198006	Q8C8H8|KY_MOUSE Kyphoscoliosis peptidase OS=Mus musculus GN=Ky PE=1 SV=1	789819	623657	725663	658293	727374	687386	1.01309e+06	738498	991175	901848	645776	776755	732584	982887	838497	709134	570414	668887	670963	788531
Q8BTY1	6	311.15	Kyat1	1.17201	0.499522	1.1246	0.10803	0.975102	0.733248	Q8BTY1|KAT1_MOUSE Kynurenine--oxoglutarate transaminase 1 OS=Mus musculus GN=Kyat1 PE=1 SV=1	948164	840326	895876	799371	849348	1.79876e+06	769692	583425	894308	1.03223e+06	760659	954844	805608	1.01135e+06	911260	1.05871e+06	999232	890297	937936	1.11124e+06
Q71RI9	11	520.3	Kyat3	0.89763	0.0874583	0.761808	0.000498422	0.935458	0.0812868	Q71RI9|KAT3_MOUSE Kynurenine--oxoglutarate transaminase 3 OS=Mus musculus GN=Kyat3 PE=1 SV=1	1.09979e+07	1.09561e+07	1.09578e+07	1.22316e+07	1.02647e+07	1.09315e+07	1.13136e+07	8.97075e+06	9.134e+06	9.38625e+06	1.14527e+07	1.20404e+07	1.18819e+07	1.25596e+07	1.12965e+07	8.75713e+06	8.10141e+06	8.27619e+06	9.41383e+06	1.05741e+07
Q91YP0	7	251.86	L2hgdh	1.00622	0.953248	0.699743	0.00737191	0.830803	0.0821693	Q91YP0|L2HDH_MOUSE L-2-hydroxyglutarate dehydrogenase, mitochondrial OS=Mus musculus GN=L2hgdh PE=1 SV=1	1.10305e+06	1.12017e+06	864532	931504	1.25754e+06	950686	1.34465e+06	974332	891035	1.14894e+06	1.043e+06	1.47023e+06	1.12178e+06	1.36073e+06	1.3557e+06	759134	752033	837149	973285	1.12277e+06
Q8BLB7	1	28.99	L3mbtl3	2.46269	0.153272	0.451301	0.10695	0.478494	0.0803421	Q8BLB7|LMBL3_MOUSE Lethal(3)malignant brain tumor-like protein 3 OS=Mus musculus GN=L3mbtl3 PE=1 SV=1	126976	617427	133717	197693	195695	95381.8	329659	1.37491e+06	598807	732562	652275	538987	815777	490243	160032	77444	204158	52806	164160	700681
P01843	1	48.31	LAC1_MOUSE	3.28876	0.0126399	2.75551	0.0100518	0.544483	0.201852	P01843|LAC1_MOUSE Ig lambda-1 chain C region OS=Mus musculus PE=1 SV=1	157382	77452.1	103835	129588	184799	732800	549999	294022	261585	309336	146986	258324	277516	72315.2	444265	517374	999572	634902	370115	783014
Q3V384	9	389.09	Lace1	1.24345	0.00797925	0.907519	0.225441	0.987637	0.874468	Q3V384|LACE1_MOUSE Lactation elevated protein 1 OS=Mus musculus GN=Lace1 PE=1 SV=1	4.31073e+06	3.88716e+06	3.78738e+06	4.84463e+06	4.71521e+06	5.5057e+06	5.36188e+06	4.57724e+06	5.84089e+06	5.50459e+06	4.23349e+06	4.26229e+06	4.42113e+06	5.17004e+06	3.72787e+06	4.44561e+06	3.79468e+06	3.39066e+06	3.77928e+06	4.38711e+06
Q9EP89	3	165.45	Lactb	1.21925	0.0730421	0.822895	0.1417	0.791202	0.0629537	Q9EP89|LACTB_MOUSE Serine beta-lactamase-like protein LACTB, mitochondrial OS=Mus musculus GN=Lactb PE=1 SV=1	784965	734043	704809	718873	896168	789608	1.21461e+06	944027	870612	861680	1.28494e+06	903878	1.07021e+06	811852	781048	960920	703456	837006	797908	693342
Q99KR3	3	79.99	Lactb2	1.04758	0.638065	0.974281	0.760646	0.83019	0.0558326	Q99KR3|LACB2_MOUSE Endoribonuclease LACTB2 OS=Mus musculus GN=Lactb2 PE=1 SV=1	207816	245173	258657	226938	306593	229965	232284	236479	291624	314073	291695	250422	303043	349923	304786	355500	273797	299370	290716	241911
Q60675	79	4534	Lama2	0.795352	0.000437199	0.795224	0.000476304	0.969699	0.477092	Q60675|LAMA2_MOUSE Laminin subunit alpha-2 OS=Mus musculus GN=Lama2 PE=1 SV=2	1.24789e+08	1.17938e+08	1.23194e+08	1.26115e+08	1.43589e+08	1.01196e+08	1.02294e+08	1.05321e+08	9.86795e+07	9.80555e+07	1.41685e+08	1.35841e+08	1.2327e+08	1.30533e+08	1.24157e+08	1.09302e+08	9.65441e+07	1.01597e+08	9.98497e+07	1.13966e+08
Q61789	1	33.45	Lama3	1.26021	0.0155647	1.08901	0.334898	0.942894	0.356794	Q61789|LAMA3_MOUSE Laminin subunit alpha-3 OS=Mus musculus GN=Lama3 PE=1 SV=4	914798	991690	741278	897641	866339	1.13813e+06	981728	953464	1.27422e+06	1.21221e+06	816480	985517	894987	1.00663e+06	975331	908560	930786	1.30555e+06	953398	997145
P97927	14	560.01	Lama4	1.09576	0.13424	1.09301	0.118437	0.909461	0.073058	P97927|LAMA4_MOUSE Laminin subunit alpha-4 OS=Mus musculus GN=Lama4 PE=1 SV=2	6.14294e+06	5.50552e+06	6.35773e+06	5.37913e+06	5.9687e+06	5.40466e+06	6.278e+06	6.92701e+06	6.87246e+06	6.68288e+06	7.02151e+06	6.84548e+06	6.03649e+06	5.94538e+06	6.42743e+06	7.84348e+06	7.53409e+06	6.78804e+06	6.43768e+06	6.67492e+06
Q61001	8	454.8	Lama5	1.9194	0.000145006	1.55246	0.000511093	1.01546	0.766552	Q61001|LAMA5_MOUSE Laminin subunit alpha-5 OS=Mus musculus GN=Lama5 PE=1 SV=4	1.03768e+06	979225	1.12816e+06	956327	971686	2.34647e+06	1.7813e+06	1.62467e+06	2.17541e+06	1.80944e+06	846215	1.10161e+06	906117	1.20248e+06	939420	1.76075e+06	1.30704e+06	1.57562e+06	1.59366e+06	1.5188e+06
P02469	39	2124.33	Lamb1	0.853729	0.0003673	0.8676	0.00142307	0.972646	0.39472	P02469|LAMB1_MOUSE Laminin subunit beta-1 OS=Mus musculus GN=Lamb1 PE=1 SV=3	5.37345e+07	5.04473e+07	5.43885e+07	5.28656e+07	5.83896e+07	4.52344e+07	4.71222e+07	4.53094e+07	4.64775e+07	4.62144e+07	5.7434e+07	5.85173e+07	5.3363e+07	5.54023e+07	5.26973e+07	5.12673e+07	4.50377e+07	4.80023e+07	4.69865e+07	4.93905e+07
Q61292	28	1448.06	Lamb2	0.945689	0.159987	0.925854	0.028868	0.971089	0.443679	Q61292|LAMB2_MOUSE Laminin subunit beta-2 OS=Mus musculus GN=Lamb2 PE=1 SV=2	2.39421e+07	2.10067e+07	2.36904e+07	2.1549e+07	2.47524e+07	2.19423e+07	2.11875e+07	2.06952e+07	2.22454e+07	2.26276e+07	2.36141e+07	2.53579e+07	2.23462e+07	2.37742e+07	2.327e+07	2.3132e+07	2.18362e+07	2.09427e+07	2.09726e+07	2.2703e+07
P02468	47	2903.77	Lamc1	0.887055	0.0398151	0.873982	0.0221484	0.966184	0.538652	P02468|LAMC1_MOUSE Laminin subunit gamma-1 OS=Mus musculus GN=Lamc1 PE=1 SV=2	9.94858e+07	8.66587e+07	9.47483e+07	9.34069e+07	1.10845e+08	8.7497e+07	8.05155e+07	9.05154e+07	8.9378e+07	8.24443e+07	1.08938e+08	1.06268e+08	9.14901e+07	1.03281e+08	9.21476e+07	9.62947e+07	8.36925e+07	8.15918e+07	8.66527e+07	9.06164e+07
P11438	2	78.05	Lamp1	0.858265	0.33194	1.81327	1.44728e-05	1.39258	0.0228676	P11438|LAMP1_MOUSE Lysosome-associated membrane glycoprotein 1 OS=Mus musculus GN=Lamp1 PE=1 SV=2	729532	1.27972e+06	785954	824142	754752	987681	640752	739611	652107	733984	605316	596280	634749	729280	575376	1.08115e+06	1.32319e+06	1.13752e+06	1.09503e+06	1.05859e+06
P17047	2	59.72	Lamp2	1.30993	0.422511	1.7456	0.00221235	1.17942	0.186494	P17047|LAMP2_MOUSE Lysosome-associated membrane glycoprotein 2 OS=Mus musculus GN=Lamp2 PE=1 SV=2	261209	396687	309490	386524	315555	910717	249735	357407	337500	331530	231412	325395	240455	257392	360840	446057	616674	558287	397469	452397
O88653	2	70.26	Lamtor3	0.848247	0.153003	1.27334	0.0763391	1.03233	0.669728	O88653|LTOR3_MOUSE Ragulator complex protein LAMTOR3 OS=Mus musculus GN=Lamtor3 PE=1 SV=1	457889	543852	538398	601200	499119	389570	389090	360851	598685	501565	595694	663898	358545	343899	595741	703480	615024	626976	677211	634237
Q9JJK2	1	29.71	Lancl2	2.05263	0.37692	0.246916	0.0194082	0.219504	0.005221	Q9JJK2|LANC2_MOUSE LanC-like protein 2 OS=Mus musculus GN=Lancl2 PE=1 SV=1	4711.65	4965.11	15647.6	2602.74	18725.8	0	5765.03	56788.2	13833.8	19374.3	25108	30403.3	64648.7	68326	24051.7	28562.9	6184.19	0	10099.6	7632.16
Q9CPY7	15	742.2	Lap3	1.08303	0.0199262	0.839516	0.004105	0.853415	0.00247574	Q9CPY7|AMPL_MOUSE Cytosol aminopeptidase OS=Mus musculus GN=Lap3 PE=1 SV=3	2.78975e+07	2.6756e+07	2.90426e+07	2.76041e+07	2.87896e+07	2.9977e+07	3.25566e+07	2.90954e+07	3.12056e+07	2.88866e+07	3.34065e+07	3.00542e+07	3.54016e+07	3.46828e+07	3.06069e+07	2.84425e+07	2.69632e+07	2.49968e+07	2.77436e+07	2.96621e+07
Q8BMJ2	1	27.33	Lars	1.00722	0.971322	0.829496	0.400878	0.784274	0.232869	Q8BMJ2|SYLC_MOUSE Leucine--tRNA ligase, cytoplasmic OS=Mus musculus GN=Lars PE=1 SV=2	73376.7	116541	146303	111102	115867	128069	178836	97056.3	73185.9	90112.7	161372	83931.3	124636	175429	172736	146288	137465	152783	123173	35956.6
Q8VDC0;Q9D9J8	3	52.86	Lars2	1.36643	0.248206	1.40968	0.0612918	1.1272	0.257565	Q8VDC0|SYLM_MOUSE Probable leucine--tRNA ligase, mitochondrial OS=Mus musculus GN=Lars2 PE=1 SV=1	2.58285e+06	3.0851e+06	3.19221e+06	2.8246e+06	3.37102e+06	4.3479e+06	2.6496e+06	7.4222e+06	2.98842e+06	3.16462e+06	3.03474e+06	3.47097e+06	2.58511e+06	2.31394e+06	1.95206e+06	2.49343e+06	3.59839e+06	3.33603e+06	4.52959e+06	4.87141e+06
Q61792	4	83.45	Lasp1	0.858993	0.384243	1.24613	0.0537432	1.17556	0.412199	Q61792|LASP1_MOUSE LIM and SH3 domain protein 1 OS=Mus musculus GN=Lasp1 PE=1 SV=1	896309	1.2782e+06	613113	1.29137e+06	1.14393e+06	1.1447e+06	666827	1.09853e+06	786632	789773	1.04762e+06	844942	748337	794301	1.00773e+06	1.29334e+06	1.25285e+06	1.10675e+06	1.00009e+06	883461
Q61233	5	195.45	Lcp1	3.26542	0.000870047	2.4709	0.000864275	0.949919	0.981905	Q61233|PLSL_MOUSE Plastin-2 OS=Mus musculus GN=Lcp1 PE=1 SV=4	284581	225981	295143	328622	261656	1.26111e+06	588070	734840	873591	1.10086e+06	237184	193516	263353	275436	500091	863694	793105	744340	747150	482903
Q8BVA5	1	36.17	Ldah	1.05629	0.822417	0.730712	0.161638	1.1859	0.625666	Q8BVA5|LDAH_MOUSE Lipid droplet-associated hydrolase OS=Mus musculus GN=Ldah PE=1 SV=1	177148	74274.5	82215.3	108555	52895.7	119904	118351	78833.6	78034.8	127832	91055.5	65956.6	73905.5	127272	59287.9	72279.1	29428.2	72248.2	66286.4	64813.8
Q9JKS4	43	3134.25	Ldb3	0.903563	0.151935	0.987317	0.855922	1.04949	0.545216	Q9JKS4|LDB3_MOUSE LIM domain-binding protein 3 OS=Mus musculus GN=Ldb3 PE=1 SV=1	3.06867e+08	3.81103e+08	3.15637e+08	3.93746e+08	3.74204e+08	3.67526e+08	3.06753e+08	3.0405e+08	3.0611e+08	3.16274e+08	3.67638e+08	3.82703e+08	2.86408e+08	3.58235e+08	2.93028e+08	3.27066e+08	3.39234e+08	2.98192e+08	3.34925e+08	3.67186e+08
P06151;P00342	22	1357.05	Ldha	1.26441	0.0104544	1.24077	0.00137435	1.02862	0.470453	P06151|LDHA_MOUSE L-lactate dehydrogenase A chain OS=Mus musculus GN=Ldha PE=1 SV=3	1.38667e+08	1.298e+08	1.40776e+08	1.31272e+08	1.34569e+08	1.99839e+08	1.57456e+08	1.4208e+08	1.65035e+08	1.89174e+08	1.24822e+08	1.16897e+08	1.42915e+08	1.40244e+08	1.31425e+08	1.7636e+08	1.54713e+08	1.7101e+08	1.56678e+08	1.55558e+08
P16125	27	2401.14	Ldhb	0.964918	0.422669	0.856648	0.00313601	0.930782	0.111393	P16125|LDHB_MOUSE L-lactate dehydrogenase B chain OS=Mus musculus GN=Ldhb PE=1 SV=2	5.24086e+08	4.84292e+08	5.12862e+08	4.62085e+08	4.8042e+08	5.25631e+08	4.54581e+08	4.24272e+08	4.88275e+08	4.84553e+08	5.09738e+08	4.73099e+08	5.55979e+08	5.59617e+08	5.48531e+08	4.48164e+08	4.27572e+08	4.57435e+08	4.66125e+08	4.68222e+08
Q9Z2I0	11	720.56	Letm1	0.971933	0.798064	0.804448	0.044449	0.904745	0.267504	Q9Z2I0|LETM1_MOUSE LETM1 and EF-hand domain-containing protein 1, mitochondrial OS=Mus musculus GN=Letm1 PE=1 SV=1	1.01834e+07	9.61121e+06	9.70521e+06	7.52232e+06	8.37828e+06	7.0909e+06	1.19366e+07	7.93257e+06	8.30677e+06	8.85922e+06	8.56968e+06	9.4159e+06	9.30982e+06	1.20979e+07	1.07869e+07	6.22373e+06	7.74223e+06	9.07962e+06	9.14698e+06	8.17485e+06
P16045	11	612.24	Lgals1	0.766972	0.0194601	1.08316	0.395787	1.18582	0.0730858	P16045|LEG1_MOUSE Galectin-1 OS=Mus musculus GN=Lgals1 PE=1 SV=3	3.47968e+07	3.32817e+07	3.94978e+07	3.90569e+07	2.97706e+07	3.48236e+07	2.32734e+07	2.8459e+07	2.35061e+07	2.52346e+07	3.39833e+07	3.34627e+07	2.61464e+07	2.45217e+07	3.06465e+07	2.51458e+07	3.57267e+07	3.1926e+07	3.63168e+07	3.20164e+07
P16110	1	21.42	Lgals3	3.38221	0.0540537	3.53549	0.0861626	1.09989	0.536253	P16110|LEG3_MOUSE Galectin-3 OS=Mus musculus GN=Lgals3 PE=1 SV=3	10203.9	13535.8	68295.3	28984.6	19050.6	166091	36363.6	72574.5	43516.9	155200	5588.3	16075.4	26484.6	3736.09	75465.2	127687	191683	52836.9	39704	38333.4
O89017	1	59.23	Lgmn	1.94699	0.0527796	1.42509	0.398007	0.960171	0.756754	O89017|LGMN_MOUSE Legumain OS=Mus musculus GN=Lgmn PE=1 SV=1	112134	106207	81498.1	116549	52310.3	313888	132973	93610.7	182374	189706	100750	131618	49749.6	27852.5	178172	235207	7025.45	172160	158258	122998
Q99M04	1	55.93	Lias	0.735416	0.218095	0.837842	0.53308	1.03155	0.891701	Q99M04|LIAS_MOUSE Lipoyl synthase, mitochondrial OS=Mus musculus GN=Lias PE=1 SV=1	57685.2	76583.7	25673	72567.9	68906.1	16674.2	62598.7	50474.1	48253	43666	95070.3	58640.7	28431.5	45078.3	64975.5	77427.6	53086.6	23350.3	34024.8	56924.9
P42703	2	60.19	Lifr	1.26603	0.245025	1.22034	0.286079	1.03605	0.892253	P42703|LIFR_MOUSE Leukemia inhibitory factor receptor OS=Mus musculus GN=Lifr PE=1 SV=1	46032.6	117823	98673.6	125233	94735.7	74690.2	135885	149793	150875	99612.2	86604.6	74371.1	69307.2	75387.4	160040	109712	103705	136483	106163	112260
Q3UH68	7	283.81	Limch1	1.02757	0.736746	1.10362	0.320302	0.950119	0.524089	Q3UH68|LIMC1_MOUSE LIM and calponin homology domains-containing protein 1 OS=Mus musculus GN=Limch1 PE=1 SV=2	1.29047e+06	1.08163e+06	1.36944e+06	1.35478e+06	1.66469e+06	1.26509e+06	1.28513e+06	1.39329e+06	1.53893e+06	1.46497e+06	1.66744e+06	1.44931e+06	1.23965e+06	1.38115e+06	1.37841e+06	2.02226e+06	1.40413e+06	1.61725e+06	1.42449e+06	1.38515e+06
Q8JZS0;O88951	2	70.51	Lin7a	0.866084	0.0163093	1.17897	0.226985	1.08278	0.413358	Q8JZS0|LIN7A_MOUSE Protein lin-7 homolog A OS=Mus musculus GN=Lin7a PE=1 SV=2	539332	456844	505919	465473	503714	471496	380574	423719	453038	411509	598874	472590	393413	304443	513036	533846	469883	621212	444968	620922
Q9DBH5	1	36.17	Lman2	1.15875	0.619233	1.41506	0.0777668	1.21014	0.467864	Q9DBH5|LMAN2_MOUSE Vesicular integral-membrane protein VIP36 OS=Mus musculus GN=Lman2 PE=1 SV=2	156756	119495	84975.9	77530.3	56692.6	55813.9	198903	132859	77200.6	109326	43086.5	74080.3	114949	61269	116032	109750	107513	144419	122552	95116.2
Q8VEE1	1	37.88	Lmcd1	0.616745	0.0190725	1.14584	0.239197	1.11344	0.316435	Q8VEE1|LMCD1_MOUSE LIM and cysteine-rich domains protein 1 OS=Mus musculus GN=Lmcd1 PE=1 SV=1	209988	195548	204514	252279	290117	83912.1	127929	215283	103597	180044	222337	180941	222667	236265	172824	262343	286728	250507	215051	171360
P48678	38	2246.92	Lmna	0.928081	0.207579	1.20775	0.00386028	1.0575	0.171013	P48678|LMNA_MOUSE Prelamin-A/C OS=Mus musculus GN=Lmna PE=1 SV=2	9.04783e+07	1.04189e+08	9.78119e+07	9.8597e+07	8.76607e+07	1.00661e+08	7.75228e+07	9.5002e+07	8.59967e+07	8.51238e+07	9.12919e+07	9.48286e+07	9.29013e+07	8.53106e+07	8.8376e+07	1.07868e+08	1.26137e+08	1.07781e+08	1.03334e+08	1.0164e+08
P14733	9	642.95	Lmnb1	1.05844	0.530305	1.15956	0.0413282	1.06631	0.319175	P14733|LMNB1_MOUSE Lamin-B1 OS=Mus musculus GN=Lmnb1 PE=1 SV=3	3.75782e+06	4.59528e+06	4.6389e+06	4.92751e+06	4.48724e+06	5.96059e+06	3.88511e+06	4.29023e+06	4.7829e+06	4.7973e+06	4.0438e+06	4.54602e+06	4.00223e+06	3.80491e+06	4.61641e+06	5.39094e+06	5.41034e+06	4.59806e+06	4.28749e+06	4.67948e+06
P21619	12	864.08	Lmnb2	0.696477	0.00107269	1.11968	0.113282	1.02155	0.664109	P21619|LMNB2_MOUSE Lamin-B2 OS=Mus musculus GN=Lmnb2 PE=1 SV=2	4.54293e+06	4.77613e+06	5.12811e+06	4.85899e+06	4.47226e+06	2.58874e+06	3.04333e+06	4.19905e+06	3.28213e+06	3.44786e+06	4.76987e+06	4.81246e+06	4.68154e+06	3.84949e+06	5.16343e+06	5.33485e+06	5.85037e+06	5.46877e+06	4.78585e+06	4.62261e+06
Q3UHZ5	8	290.39	Lmod2	0.940895	0.64264	1.10381	0.160035	0.996743	0.871527	Q3UHZ5|LMOD2_MOUSE Leiomodin-2 OS=Mus musculus GN=Lmod2 PE=1 SV=1	1.9548e+06	2.80851e+06	1.50685e+06	2.6399e+06	2.78385e+06	1.986e+06	1.86713e+06	2.41349e+06	2.2327e+06	2.5034e+06	2.88959e+06	2.46056e+06	2.03014e+06	2.26545e+06	2.08637e+06	2.59351e+06	2.607e+06	2.51648e+06	2.66804e+06	2.56497e+06
Q8C129	1	79.43	Lnpep	1.47988	0.250003	1.13907	0.656886	0.897057	0.997135	Q8C129|LCAP_MOUSE Leucyl-cystinyl aminopeptidase OS=Mus musculus GN=Lnpep PE=1 SV=1	42623.6	77150.5	22734.4	19916.3	30808.7	83774.9	67715.4	42486.4	23372.9	68613.4	9318.31	21709.4	65596.7	49417.5	69366.2	30760.4	59382	57941.2	51707	45574.2
Q8CGK3	31	1638.73	Lonp1	0.900996	0.218922	1.04306	0.334672	1.16833	0.00144057	Q8CGK3|LONM_MOUSE Lon protease homolog, mitochondrial OS=Mus musculus GN=Lonp1 PE=1 SV=2	1.94146e+08	1.82722e+08	1.90895e+08	1.8562e+08	1.80311e+08	2.08634e+08	1.85366e+08	1.30167e+08	1.49943e+08	1.67145e+08	1.44376e+08	1.67311e+08	1.5678e+08	1.71859e+08	1.58842e+08	1.80036e+08	1.5999e+08	1.63445e+08	1.54799e+08	1.7531e+08
Q9D5U0	1	15.79	Lpcat2b	1.9168	0.172842	0.277388	0.00605153	0.473075	0.0702359	Q9D5U0|PCT2B_MOUSE Lysophosphatidylcholine acyltransferase 2B OS=Mus musculus GN=Lpcat2b PE=2 SV=1	4.89313e+06	3.25327e+06	2.76048e+06	3.44747e+06	3.42603e+06	1.53295e+07	5.37478e+06	5.03121e+06	3.60572e+06	4.74029e+06	2.11829e+06	8.43219e+06	8.30019e+06	7.70224e+06	1.10318e+07	2.16779e+06	1.86225e+06	1.93394e+06	2.3337e+06	2.12786e+06
P11152;Q9WVG5	6	499.54	Lpl	1.08346	0.520773	1.53457	0.000362881	1.39108	0.000829646	P11152|LIPL_MOUSE Lipoprotein lipase OS=Mus musculus GN=Lpl PE=1 SV=3	5.47868e+06	6.53297e+06	6.45343e+06	7.4437e+06	6.65559e+06	8.9111e+06	6.10585e+06	5.16562e+06	6.38015e+06	8.71943e+06	4.85226e+06	4.3589e+06	4.14086e+06	4.97676e+06	5.08066e+06	7.47527e+06	6.41665e+06	8.16282e+06	7.70054e+06	6.16822e+06
Q8BFW7	4	108.35	Lpp	0.909509	0.33713	1.1319	0.277043	1.01682	0.954294	Q8BFW7|LPP_MOUSE Lipoma-preferred partner homolog OS=Mus musculus GN=Lpp PE=1 SV=1	3.95199e+06	4.7531e+06	4.99685e+06	3.9608e+06	3.18071e+06	3.27059e+06	3.65691e+06	4.19822e+06	4.19025e+06	3.64134e+06	4.21614e+06	4.05777e+06	3.93476e+06	3.9551e+06	4.33484e+06	4.26646e+06	6.43061e+06	4.50184e+06	4.01605e+06	3.98746e+06
A2ARV4	1	21	Lrp2	7.88585	0.23227	4.89894	0.185522	1.98124	0.258578	A2ARV4|LRP2_MOUSE Low-density lipoprotein receptor-related protein 2 OS=Mus musculus GN=Lrp2 PE=1 SV=1	58624.9	0	30570.5	26831.5	0	668613	121082	0	38444	86831.7	0	0	0	0	58562.7	0	35396.7	160650	10712.7	80135.1
P55302	6	223.5	Lrpap1	0.951888	0.675859	1.58918	0.000930299	1.34852	0.0636939	P55302|AMRP_MOUSE Alpha-2-macroglobulin receptor-associated protein OS=Mus musculus GN=Lrpap1 PE=1 SV=1	1.03805e+06	1.51559e+06	1.41693e+06	1.47804e+06	1.06531e+06	1.55981e+06	960601	1.11079e+06	1.30596e+06	1.26336e+06	949800	1.23466e+06	842014	635640	1.16832e+06	1.47564e+06	1.5012e+06	1.61551e+06	1.54615e+06	1.53795e+06
Q6PB66	43	2632.05	Lrpprc	1.11549	0.107984	0.796291	0.0116386	0.903305	0.153876	Q6PB66|LPPRC_MOUSE Leucine-rich PPR motif-containing protein, mitochondrial OS=Mus musculus GN=Lrpprc PE=1 SV=2	3.95248e+07	3.32278e+07	3.46367e+07	3.33334e+07	3.80848e+07	3.94424e+07	4.69754e+07	3.58254e+07	3.79613e+07	3.92528e+07	4.1976e+07	3.42447e+07	3.9732e+07	4.57933e+07	3.62021e+07	3.00546e+07	2.70409e+07	3.17841e+07	3.41646e+07	3.45802e+07
Q8VC16	1	13.88	Lrrc14	0.90415	0.680344	1.27927	0.327236	0.899506	0.611589	Q8VC16|LRC14_MOUSE Leucine-rich repeat-containing protein 14 OS=Mus musculus GN=Lrrc14 PE=1 SV=1	95400	163549	103452	110673	157835	23107.6	116051	168801	136119	126359	169942	114134	160286	172743	84290.4	141979	312019	151288	149789	142201
Q8BGI7	1	15.41	Lrrc39	0.513737	0.0752966	0.75849	0.39464	1.26805	0.456263	Q8BGI7|LRC39_MOUSE Leucine-rich repeat-containing protein 39 OS=Mus musculus GN=Lrrc39 PE=1 SV=1	92291.4	46960.7	114437	42409	101377	38145.4	72453.6	59304.9	3168.54	31125.1	66664.8	84294.1	66457.3	71194.1	24843	50818.3	32900.1	98880.2	29386.5	25766.1
Q9D0R8	1	59.67	Lsm12	0.640901	0.291284	1.76902	0.0335027	1.12418	0.776653	Q9D0R8|LSM12_MOUSE Protein LSM12 homolog OS=Mus musculus GN=Lsm12 PE=1 SV=1	4054.29	18518.4	6956.66	8341.37	20477.1	8744.14	13634.2	5989.94	4712.01	4314.86	2157.34	7509.65	16401.8	12631.2	13202.8	13132.5	19341.2	18140.2	24507.9	16695
Q9QXA5	1	41.35	Lsm4	1.23634	0.423018	1.49408	0.06791	1.17652	0.580791	Q9QXA5|LSM4_MOUSE U6 snRNA-associated Sm-like protein LSm4 OS=Mus musculus GN=Lsm4 PE=1 SV=1	185734	89594.6	240069	277908	208586	414658	236336	206347	247947	133393	207185	251287	161363	118285	113450	234957	188797	364341	262261	221956
Q9CQQ8	1	13.54	Lsm7	0.578926	0.0152042	1.33732	0.0605425	1.42754	0.0552288	Q9CQQ8|LSM7_MOUSE U6 snRNA-associated Sm-like protein LSm7 OS=Mus musculus GN=Lsm7 PE=1 SV=1	70262.7	137193	129194	107079	95958	72905.6	46972.4	89990.7	42986.1	59584.2	94452.3	79458.3	61651.6	56137.3	86355.6	97630.9	115430	101525	121855	69139.5
P24527	12	518.11	Lta4h	1.03302	0.583995	1.07398	0.389127	1.15964	0.0880154	P24527|LKHA4_MOUSE Leukotriene A-4 hydrolase OS=Mus musculus GN=Lta4h PE=1 SV=4	2.97911e+06	2.90357e+06	2.85935e+06	2.87598e+06	2.80621e+06	3.30012e+06	2.84048e+06	2.41911e+06	3.29751e+06	3.04326e+06	2.09618e+06	1.94829e+06	2.65408e+06	2.98232e+06	2.75765e+06	2.62527e+06	2.55365e+06	2.76003e+06	2.7285e+06	2.69125e+06
Q8K4G1	1	13.96	Ltbp4	1.15119	0.669319	3.81782	0.00180275	1.89341	0.0525741	Q8K4G1|LTBP4_MOUSE Latent-transforming growth factor beta-binding protein 4 OS=Mus musculus GN=Ltbp4 PE=1 SV=2	99920.4	60633.3	48338.2	48098.7	45647	116627	16330.2	102078	54363	58997.1	19235.7	32807.9	33206.1	10505.1	64082.1	180325	136501	114000	102326	77077.1
Q7TNC4	1	113.74	Luc7l2	1.0137	0.885307	1.42769	0.00917949	1.07162	0.406091	Q7TNC4|LC7L2_MOUSE Putative RNA-binding protein Luc7-like 2 OS=Mus musculus GN=Luc7l2 PE=1 SV=1	370036	365407	336169	450439	342532	401202	341041	292065	449473	406352	431114	350334	323528	341361	293622	517347	349978	533423	550757	532622
P51885	9	567.4	Lum	1.12182	0.411554	1.536	0.00552403	1.08502	0.450668	P51885|LUM_MOUSE Lumican OS=Mus musculus GN=Lum PE=1 SV=2	3.14229e+07	3.18045e+07	4.03878e+07	3.44851e+07	2.68762e+07	5.01417e+07	3.13486e+07	4.28588e+07	3.19923e+07	2.87331e+07	2.75562e+07	3.21391e+07	2.98699e+07	2.28029e+07	3.96817e+07	4.75192e+07	5.6912e+07	5.01066e+07	3.95182e+07	3.94928e+07
P01723	1	20.98	LV1A_MOUSE	1.63247	0.00266244	1.7491	0.00903081	0.841877	0.236946	P01723|LV1A_MOUSE Ig lambda-1 chain V region OS=Mus musculus PE=1 SV=2	84757.7	50294.7	67537.8	63117.2	83380	97351.9	103945	101727	133285	133565	93511.2	63659.8	89382.2	66454.7	101646	161644	195830	109152	109339	149306
P0CW02	1	79.97	Ly6c1	0.966601	0.92703	0.971986	0.90949	0.595167	0.0776003	P0CW02|LY6C1_MOUSE Lymphocyte antigen 6C1 OS=Mus musculus GN=Ly6c1 PE=2 SV=1	51077.8	197430	72514.9	96081.9	56792.2	36152.9	121618	141411	53961.1	104926	114870	124639	231365	107086	218281	99013.7	188085	241325	139777	105734
P97823	5	255.15	Lypla1	1.05272	0.522825	0.866126	0.0586521	0.972524	0.561261	P97823|LYPA1_MOUSE Acyl-protein thioesterase 1 OS=Mus musculus GN=Lypla1 PE=1 SV=1	7.74322e+06	6.58978e+06	6.74595e+06	7.17639e+06	6.81199e+06	9.22661e+06	7.27728e+06	6.3141e+06	6.55003e+06	7.54809e+06	7.23378e+06	7.04362e+06	6.39908e+06	7.55111e+06	7.83045e+06	6.46678e+06	5.09153e+06	5.92661e+06	6.436e+06	7.30987e+06
Q9WTL7	1	45.39	Lypla2	1.11347	0.517055	1.08937	0.474762	1.18615	0.0973392	Q9WTL7|LYPA2_MOUSE Acyl-protein thioesterase 2 OS=Mus musculus GN=Lypla2 PE=1 SV=1	317829	328021	229352	322947	279527	485744	255290	222040	329214	353054	250547	257887	241658	202583	293102	352777	224221	228914	238799	312400
Q8K215	2	37.7	Lyrm4	1.16506	0.251156	0.898285	0.343916	0.853673	0.209947	Q8K215|LYRM4_MOUSE LYR motif-containing protein 4 OS=Mus musculus GN=Lyrm4 PE=1 SV=1	440145	619088	683544	709783	599384	689305	733264	480874	763568	888697	584684	592201	873221	720511	804458	542016	692174	563290	628664	785293
Q9DA03	1	59.99	Lyrm7	0.911571	0.419356	0.967214	0.814053	0.9838	0.98511	Q9DA03|LYRM7_MOUSE Complex III assembly factor LYRM7 OS=Mus musculus GN=Lyrm7 PE=3 SV=2	602558	649139	711098	870214	651928	850362	602377	531206	586485	606336	977578	712483	467972	658271	726016	873601	590693	622527	651478	687885
Q3UN90	1	38.7	Lyrm9	0.403378	0.000869594	1.28686	0.164028	1.4972	0.0317822	Q3UN90|LYRM9_MOUSE LYR motif-containing protein 9 OS=Mus musculus GN=Lyrm9 PE=3 SV=1	134413	177038	174377	192543	123491	96840.8	31261.8	87060.5	38735.6	69554.7	166466	78660.1	113504	100694	76250.2	137302	181890	121108	117438	131472
P17897	1	32.47	Lyz1	0.340509	0.153158	1.06261	0.899318	2.84114	0.482387	P17897|LYZ1_MOUSE Lysozyme C-1 OS=Mus musculus GN=Lyz1 PE=1 SV=1	25641.7	124406	60383	164909	2513.6	0	53756.4	28569.8	18299.5	28036.4	55099.4	18115.3	13129.5	6971.74	39677.3	7180.55	19006.6	37993.7	18660.9	58477.8
Q8K3C3	5	209.43	Lzic	0.719696	0.0118768	1.10989	0.513105	1.1778	0.246393	Q8K3C3|LZIC_MOUSE Protein LZIC OS=Mus musculus GN=Lzic PE=1 SV=1	3.11637e+06	3.84979e+06	3.22868e+06	3.94282e+06	3.6817e+06	3.5017e+06	2.06763e+06	2.12226e+06	2.68597e+06	2.44695e+06	3.49589e+06	3.74755e+06	2.06191e+06	1.87764e+06	3.9464e+06	4.09301e+06	3.55522e+06	3.09473e+06	2.94089e+06	3.10804e+06
Q9QXZ0	1	32.25	Macf1	0.00336675	0.0226074	#DIV/0!	0.0169173	#DIV/0!	4.19997e-10	Q9QXZ0|MACF1_MOUSE Microtubule-actin cross-linking factor 1 OS=Mus musculus GN=Macf1 PE=1 SV=2	147617	54575.8	60112.7	30012.7	22794.5	1060.91	0	0	0	0	0	0	0	0	0	12932.8	15042.5	7608.81	0	5088.95
Q922B1	10	555.99	Macrod1	1.02751	0.572088	0.846471	0.00363288	0.898849	0.0215068	Q922B1|MACD1_MOUSE O-acetyl-ADP-ribose deacetylase MACROD1 OS=Mus musculus GN=Macrod1 PE=1 SV=2	3.90727e+07	4.07138e+07	3.89209e+07	4.57938e+07	4.24971e+07	4.65635e+07	4.42376e+07	4.12435e+07	4.27392e+07	3.79094e+07	4.87517e+07	4.61867e+07	4.46721e+07	4.77018e+07	4.29805e+07	4.01848e+07	3.4474e+07	3.7862e+07	3.94228e+07	4.29925e+07
Q9QZ04	1	27.9	Magel2	0.473936	0.00592964	1.25789	0.337696	1.24625	0.256521	Q9QZ04|MAGL2_MOUSE MAGE-like protein 2 OS=Mus musculus GN=Magel2 PE=1 SV=2	1.61261e+07	2.71783e+07	1.83312e+07	2.82084e+07	2.89168e+07	4.47557e+06	9.19774e+06	1.58342e+07	1.38356e+07	1.29419e+07	2.24802e+07	2.1045e+07	2.5623e+07	1.41472e+07	1.19991e+07	3.17445e+07	3.25053e+07	2.67182e+07	1.22324e+07	1.66692e+07
Q8BHE8	2	58.55	Maip1	0.585991	0.0499644	0.602029	0.129878	1.28384	0.191471	Q8BHE8|MAIP1_MOUSE m-AAA protease-interacting protein 1, mitochondrial OS=Mus musculus GN=Maip1 PE=1 SV=1	115071	106689	102906	67690.7	94247.4	29031.1	116101	61798.5	42147	36068.3	53862.1	42049.4	139961	57310.8	85841.2	54613.9	49023.1	47436.7	41062.4	36047.3
Q9CXI5	2	109.73	Manf	0.765836	0.194094	1.76944	0.0232035	1.30313	0.149793	Q9CXI5|MANF_MOUSE Mesencephalic astrocyte-derived neurotrophic factor OS=Mus musculus GN=Manf PE=1 SV=1	639465	794899	778248	1.1778e+06	805229	838210	388517	939037	568316	479091	940769	667571	487248	396269	727797	1.25345e+06	1.65354e+06	1.01321e+06	1.00118e+06	775608
Q8BW75	11	465.64	Maob	0.995953	0.964089	0.663044	0.00261853	0.94278	0.477088	Q8BW75|AOFB_MOUSE Amine oxidase [flavin-containing] B OS=Mus musculus GN=Maob PE=1 SV=4	9.06866e+06	8.75992e+06	7.22476e+06	7.77309e+06	8.56494e+06	7.15461e+06	1.06266e+07	7.86114e+06	7.20904e+06	8.37244e+06	7.87375e+06	9.6133e+06	7.66258e+06	1.04835e+07	8.27046e+06	5.79103e+06	5.43873e+06	4.47055e+06	6.78722e+06	6.62245e+06
Q91VR7;Q9CQV6	2	46.52	Map1lc3a	1.02519	0.91167	1.19123	0.233995	1.05515	0.630416	Q91VR7|MLP3A_MOUSE Microtubule-associated proteins 1A/1B light chain 3A OS=Mus musculus GN=Map1lc3a PE=1 SV=1	553519	458198	560106	451777	376406	885241	346485	367811	416974	443943	428897	555334	422115	302972	565242	404907	678370	595504	479476	551276
Q63932	1	19.31	Map2k2	0.953309	0.820351	1.23166	0.40303	1.16041	0.842474	Q63932|MP2K2_MOUSE Dual specificity mitogen-activated protein kinase kinase 2 OS=Mus musculus GN=Map2k2 PE=1 SV=2	143938	129597	133240	80397.2	35611.3	112551	90518.9	98633.3	103925	92745.2	75853.5	91012.9	98967.3	65318.8	119364	108468	42478.7	96426.3	174436	133076
P27546	21	1123.1	Map4	1.08747	0.186803	1.11463	0.0963547	0.984961	0.827633	P27546|MAP4_MOUSE Microtubule-associated protein 4 OS=Mus musculus GN=Map4 PE=1 SV=3	1.81938e+07	2.20117e+07	2.06262e+07	2.21955e+07	2.38286e+07	2.46824e+07	1.98011e+07	2.44868e+07	2.35555e+07	2.3677e+07	2.24164e+07	2.31508e+07	1.85023e+07	2.03758e+07	2.40418e+07	2.69205e+07	2.53505e+07	2.32087e+07	2.21247e+07	2.33191e+07
A2AJI0	1	52.34	Map7d1	1.03932	0.852404	1.6537	0.00154451	1.18907	0.438506	A2AJI0|MA7D1_MOUSE MAP7 domain-containing protein 1 OS=Mus musculus GN=Map7d1 PE=1 SV=1	162316	157911	294251	175057	115115	207319	135445	139757	245013	212684	162514	149998	156834	134505	156956	238156	256443	314841	261819	186891
A2AG50	1	31.59	Map7d2	1.95766	0.0566349	0.596957	0.067958	0.611849	0.101479	A2AG50|MA7D2_MOUSE MAP7 domain-containing protein 2 OS=Mus musculus GN=Map7d2 PE=1 SV=1	1.1247e+06	259325	410139	305413	335018	819281	1.44348e+06	640505	931095	931749	787056	424888	588225	1.16873e+06	1.01017e+06	382928	278036	478999	551622	683753
P63085	1	15.48	Mapk1	0.90498	0.759926	1.04535	0.812487	1.03919	0.658352	P63085|MK01_MOUSE Mitogen-activated protein kinase 1 OS=Mus musculus GN=Mapk1 PE=1 SV=3	46973.6	32904.3	39365.2	38910.1	37895.2	0	60371.6	21328.6	35835.9	59883.8	36344.7	29102.9	37573	52223.2	33410.8	38580.1	17761.2	44413.4	45146.8	51307.8
P47811	1	29.75	Mapk14	10.2732	0.37519	1.13985	0.88846	1.16813	0.995485	P47811|MK14_MOUSE Mitogen-activated protein kinase 14 OS=Mus musculus GN=Mapk14 PE=1 SV=3	0	18999.2	4694.06	0	0	235263	3044.01	3677.22	0	1421.18	0	14845.1	5437.9	0	0	14402	0	3696.8	0	5020.82
Q63844	2	44.97	Mapk3	1.16704	0.0865031	0.966423	0.847396	1.01685	0.784788	Q63844|MK03_MOUSE Mitogen-activated protein kinase 3 OS=Mus musculus GN=Mapk3 PE=1 SV=5	620783	469734	457304	435595	441941	504808	644667	569439	539682	571905	346857	343234	576294	648913	469869	373193	338419	532941	625288	435239
Q8R001	4	180.98	Mapre2	0.964941	0.709143	1.10068	0.207554	1.01603	0.907411	Q8R001|MARE2_MOUSE Microtubule-associated protein RP/EB family member 2 OS=Mus musculus GN=Mapre2 PE=1 SV=1	1.2393e+06	1.70145e+06	1.18609e+06	1.37898e+06	1.69552e+06	1.63482e+06	1.2089e+06	1.42523e+06	1.3323e+06	1.34762e+06	1.64846e+06	1.54011e+06	1.45168e+06	1.26019e+06	1.18729e+06	1.67302e+06	1.40099e+06	1.4545e+06	1.57111e+06	1.7017e+06
Q6PER3	1	32.89	Mapre3	1.42067	0.128833	1.16213	0.57265	1.21629	0.538693	Q6PER3|MARE3_MOUSE Microtubule-associated protein RP/EB family member 3 OS=Mus musculus GN=Mapre3 PE=1 SV=1	496640	300479	473103	461001	167846	733695	494861	306414	568873	594102	277118	396284	216388	243908	427670	389220	282098	584439	133661	425097
P10637	7	322.16	Mapt	0.987906	0.930855	1.0512	0.605997	1.01891	0.940634	P10637|TAU_MOUSE Microtubule-associated protein tau OS=Mus musculus GN=Mapt PE=1 SV=3	3.292e+06	5.38029e+06	3.65781e+06	5.41214e+06	5.61056e+06	6.12967e+06	3.83921e+06	4.26916e+06	4.39131e+06	4.44103e+06	4.81301e+06	5.27943e+06	3.65962e+06	3.57899e+06	5.58845e+06	5.23414e+06	4.93875e+06	4.69676e+06	4.36053e+06	4.86285e+06
Q922Q1	2	84.13	Marc2	1.10045	0.235585	1.47219	0.000370556	1.24964	0.0191747	Q922Q1|MARC2_MOUSE Mitochondrial amidoxime reducing component 2 OS=Mus musculus GN=Marc2 PE=1 SV=1	344744	292386	275607	309636	247326	343748	357418	300615	271149	344394	211135	227530	221824	285215	230398	307925	362305	369947	373103	318167
P26645	10	568.82	Marcks	0.878537	0.140401	1.46336	0.0167079	1.25973	0.0190867	P26645|MARCS_MOUSE Myristoylated alanine-rich C-kinase substrate OS=Mus musculus GN=Marcks PE=1 SV=2	5.64456e+06	7.68074e+06	6.90665e+06	7.69339e+06	5.97362e+06	5.56511e+06	6.22522e+06	6.85533e+06	5.8216e+06	5.31425e+06	6.25208e+06	5.43125e+06	5.07112e+06	4.80399e+06	5.35134e+06	8.45237e+06	1.04321e+07	8.0493e+06	6.48177e+06	5.96306e+06
Q499X9	1	30.01	Mars2	1.41255	0.131153	0.544418	0.241012	1.07239	0.532963	Q499X9|SYMM_MOUSE Methionine--tRNA ligase, mitochondrial OS=Mus musculus GN=Mars2 PE=1 SV=2	24997.7	20519.9	11951.6	10944.8	15526.2	35997.5	20556.3	18260	21018.8	22737.3	6269.71	5640.3	15149.2	34219.8	16994.9	8333.61	2519.22	8673.12	16284	6803.73
P98064	1	18.23	Masp1	0.0829191	0.00126237	4.65497	0.0309995	7.40096	0.000656757	P98064|MASP1_MOUSE Mannan-binding lectin serine protease 1 OS=Mus musculus GN=Masp1 PE=1 SV=2	283160	824473	640611	917813	1.12815e+06	5383.06	78405.5	87687.4	82731.9	60404	75706.1	36071.9	65993.6	91694.5	243197	451250	680590	867294	316286	71012.7
Q60592	1	15.41	Mast2	1.02179	0.816495	0.736151	0.0114667	0.784341	0.00777995	Q60592|MAST2_MOUSE Microtubule-associated serine/threonine-protein kinase 2 OS=Mus musculus GN=Mast2 PE=1 SV=1	1.15611e+06	1.27728e+06	953254	1.07358e+06	1.13253e+06	1.24496e+06	1.27903e+06	846044	1.04656e+06	1.29802e+06	1.29863e+06	1.22615e+06	1.56493e+06	1.49706e+06	1.54373e+06	955261	736644	1.17157e+06	1.12669e+06	1.25896e+06
Q3THS6;Q91X83	3	81.6	Mat2a	1.55165	0.00228934	1.12861	0.286912	0.946763	0.735999	Q3THS6|METK2_MOUSE S-adenosylmethionine synthase isoform type-2 OS=Mus musculus GN=Mat2a PE=1 SV=2	476311	572428	426530	512914	497157	912875	731283	586076	754220	871912	418994	439782	735494	534679	496143	580205	551271	657353	597018	576860
Q99LB6	2	86.31	Mat2b	1.14611	0.364556	1.15947	0.139515	1.05095	0.625286	Q99LB6|MAT2B_MOUSE Methionine adenosyltransferase 2 subunit beta OS=Mus musculus GN=Mat2b PE=1 SV=1	325806	318875	351813	339949	239711	339810	345858	217662	467542	435576	281144	372017	241555	254899	350133	300251	354787	377602	342142	364132
Q8K310	5	164.93	Matr3	1.13697	0.42704	1.12367	0.0968813	1.08599	0.360526	Q8K310|MATR3_MOUSE Matrin-3 OS=Mus musculus GN=Matr3 PE=1 SV=1	439746	583474	480382	637551	482225	874254	502373	411983	609573	584521	423563	495302	496956	474262	525583	534862	450002	603462	537987	588107
Q8VCF0	4	180.66	Mavs	0.55043	0.0114146	1.54828	0.0481907	1.56894	0.0938222	Q8VCF0|MAVS_MOUSE Mitochondrial antiviral-signaling protein OS=Mus musculus GN=Mavs PE=1 SV=1	334315	771408	561636	568923	507320	318728	220124	394803	277301	299207	612269	372858	293800	139802	329972	522472	584662	455335	513836	631173
P04247	26	2486.88	Mb	0.966088	0.666766	1.08975	0.135949	1.0296	0.561012	P04247|MYG_MOUSE Myoglobin OS=Mus musculus GN=Mb PE=1 SV=3	3.35597e+09	3.49771e+09	3.34092e+09	3.34986e+09	2.93019e+09	3.92997e+09	2.63579e+09	2.87808e+09	3.47164e+09	3.00048e+09	3.6091e+09	3.30335e+09	3.17217e+09	3.10487e+09	2.81158e+09	3.35534e+09	3.13936e+09	3.61924e+09	3.51167e+09	3.81164e+09
P39039	2	73.26	Mbl1	1.14289	0.556826	2.59319	0.00307011	1.13669	0.537425	P39039|MBL1_MOUSE Mannose-binding protein A OS=Mus musculus GN=Mbl1 PE=1 SV=1	147169	213233	272236	152311	107994	127139	203164	258272	282590	149369	135726	292145	109013	85208.2	163469	380834	551163	467859	366768	270484
Q8R2Y2	5	152.75	Mcam	1.06132	0.640673	1.8085	0.0310487	1.30709	0.0115066	Q8R2Y2|MUC18_MOUSE Cell surface glycoprotein MUC18 OS=Mus musculus GN=Mcam PE=1 SV=1	635368	515252	772544	624808	531467	746563	502581	841287	544406	633428	482331	466395	437613	445161	524448	1.25456e+06	1.08707e+06	797609	684865	436619
Q8R3F5	5	221.51	Mcat	0.887487	0.0362347	0.84987	0.0387463	0.913406	0.227906	Q8R3F5|FABD_MOUSE Malonyl-CoA-acyl carrier protein transacylase, mitochondrial OS=Mus musculus GN=Mcat PE=1 SV=3	1.4444e+06	1.55579e+06	1.46281e+06	1.67951e+06	1.60318e+06	1.46239e+06	1.43964e+06	1.46774e+06	1.31265e+06	1.19178e+06	1.98858e+06	1.71688e+06	1.73914e+06	1.65738e+06	1.37802e+06	1.50235e+06	1.34809e+06	1.45009e+06	1.52158e+06	1.38479e+06
Q99MR8	25	1649.97	Mccc1	0.862795	0.0705822	0.673639	0.000542242	0.926847	0.20538	Q99MR8|MCCA_MOUSE Methylcrotonoyl-CoA carboxylase subunit alpha, mitochondrial OS=Mus musculus GN=Mccc1 PE=1 SV=2	5.70587e+07	5.71901e+07	5.0514e+07	5.74929e+07	6.14292e+07	4.20562e+07	6.14648e+07	4.6503e+07	4.63474e+07	4.83905e+07	6.38958e+07	6.32572e+07	5.87932e+07	6.76214e+07	5.25075e+07	4.06392e+07	3.59015e+07	3.70466e+07	4.25814e+07	5.00156e+07
Q3ULD5	25	1691.96	Mccc2	0.858216	0.0301739	0.734343	0.00118034	0.932876	0.272043	Q3ULD5|MCCB_MOUSE Methylcrotonoyl-CoA carboxylase beta chain, mitochondrial OS=Mus musculus GN=Mccc2 PE=1 SV=1	5.42188e+07	4.64914e+07	5.01529e+07	4.69784e+07	5.05187e+07	4.05942e+07	4.97941e+07	3.57936e+07	4.40962e+07	4.28687e+07	5.62224e+07	5.39744e+07	5.63562e+07	5.59935e+07	4.3684e+07	3.78576e+07	3.51404e+07	3.74113e+07	4.11028e+07	4.39923e+07
Q9D1I5	6	324.5	Mcee	0.68225	0.00293238	0.949104	0.616995	1.31739	0.0411547	Q9D1I5|MCEE_MOUSE Methylmalonyl-CoA epimerase, mitochondrial OS=Mus musculus GN=Mcee PE=1 SV=1	9.31335e+06	1.18041e+07	1.16048e+07	1.41755e+07	1.04818e+07	8.69222e+06	7.41637e+06	8.34673e+06	7.68898e+06	7.0029e+06	1.03501e+07	8.84242e+06	7.76551e+06	6.30887e+06	1.02884e+07	9.51989e+06	7.34244e+06	7.79229e+06	8.27488e+06	8.40907e+06
P11034	1	20.97	Mcpt1	0.0860126	0.0123518	0.393833	0.103891	1.30629	0.837771	P11034|MCPT1_MOUSE Mast cell protease 1 OS=Mus musculus GN=Mcpt1 PE=1 SV=2	111978	108025	229751	155761	16129.3	3934.78	32009.7	0	0	17524.8	25167.4	125631	129771	91988.1	103330	5025.56	27654.8	3928.19	14075.3	136736
Q9CQ21	1	23.37	Mcts2	0.778226	0.255913	0.966046	0.841639	1.11892	0.373956	Q9CQ21|MCTS2_MOUSE Malignant T-cell-amplified sequence 2 OS=Mus musculus GN=Mcts2 PE=1 SV=1	179334	205495	149519	154750	160185	48159	138994	95218.7	158731	219832	87841.2	170847	158869	189757	151707	193897	90261.9	171272	152899	124919
Q9CXD6	2	34.88	Mcur1	0.851883	0.384899	0.813714	0.245109	0.925907	0.532697	Q9CXD6|MCUR1_MOUSE Mitochondrial calcium uniporter regulator 1 OS=Mus musculus GN=Mcur1 PE=1 SV=1	255095	241373	176730	208586	188516	61426.3	230613	217344	186941	215446	236228	230462	185274	304197	199788	149552	134280	146448	257631	252701
[truncated: 1,076 more rows]

## Sheet: S2
Table S2. Significantly dergulated proteins in sham-irradiated heart after treatment with Fenofibrtae
[truncated: 109 more rows]

[truncated: 4 more sheets: S3, S4, S5, S6]
